# Supplementary material for: Expression of stress responsive genes enables Limosilactobacillus reuteri to cross-protection against acid, bile salt, and freeze-drying
Source: Front Microbiol. 2024 Sep 30;15:1437803. doi: 10.3389/fmicb.2024.1437803 (PMC11471561; doi:10.3389/fmicb.2024.1437803)
Supplement: Supplementary file 2 [file Table_2.XLSX]

## Sheet: CsbD_vs_36E
Protein	ProteinGroup	FastaHeaders	Proteins	Peptides	RazorUniquePeptides	UniquePeptides	Coverage	MolWeight	LFQ intensity CsbD-1	LFQ intensity CsbD-2	average CsbD	LFQ intensity 36E-1	LFQ intensity 36E-2	average 36E	CsbD/36E	Significance B
WP_072574758.1	WP_072574758.1;OJI11748.1;WP_072575188.1;OTA75794.1;OTA69797.1;OTA67645.1;OTA66278.1;OTA54269.1;OJI10371.1;WP_163622750.1;WP_152709503.1;WP_152701350.1	WP_072574758.1 hypothetical protein [Limosilactobacillus reuteri];OJI11748.1 hypothetical protein BJI45_00025 [Limosilactobacillus reuteri];WP_072575188.1 hypothetical protein [Limosilactobacillus reuteri];OTA75794.1 hypothetical protein BHL81_09335 [Limos	12	1	1	1	11.1	14.469	837690	826620	832155	625.09	709	667.045	1247.52	2.64524e-38
PTM24484.1	PTM24484.1;PTM28577.1;WP_107690532.1;OTA53739.1;CUR43963.1;WP_003669972.1;WP_063164364.1;WP_152712213.1;WP_229288977.1;QLQ61053.1;OUP84542.1;OUN42396.1;QLL76819.1;OTA83818.1;UIT53665.1;ABI26348.1;OTA86801.1;AMY14372.1;UIN25565.1;AEI57078.1;OTA52314.1;EEI64680.1;OTA81290.1;OJI10761.1;OTA74189.1;OTA69699.1;VTZ89827.1;OTA44360.1;OTA46733.1;WP_086135975.1;WP_078009655.1;CUR38201.1;CUR40225.1;OON64932…	PTM24484.1 dipeptidase [Limosilactobacillus reuteri];PTM28577.1 dipeptidase [Limosilactobacillus reuteri];WP_107690532.1 C69 family dipeptidase [Limosilactobacillus reuteri];OTA53739.1 peptidase C69 [Limosilactobacillus reuteri];CUR43963.1 Dipeptidase [Lim	48	18	1	1	42.3	54.689	3773.4	178740	91256.7	1483.4	553.83	1018.62	89.589	5.07964e-16
OTA51333.1	OTA51333.1;AMY14208.1;OTA71499.1;RNF36573.1;UCN17656.1;UCN19421.1;UZM90376.1;VTZ92626.1;WP_003675337.1;WP_016496435.1;WP_079376225.1;QKT14532.1;OTA76584.1;QDK47752.1;OTA84624.1;CCC03700.1;OTA43832.1;WP_086132006.1;CUR37744.1;OTA48827.1;OTA76848.1;OTA73721.1;OTA71126.1;CUR43730.1;CUU11722.1;OJI10597.1;OTA63925.1;OTA54377.1;OPG87711.1;OTA44003.1;AGN98398.1;OTA87975.1;WP_229276404.1;OTA47263.1;KGE72…	OTA51333.1 hypothetical protein BHL90_04110 [Limosilactobacillus reuteri];AMY14208.1 hypothetical protein ADV92_06610 [Limosilactobacillus reuteri];OTA71499.1 hypothetical protein BHL77_08135 [Limosilactobacillus reuteri];RNF36573.1 hypothetical protein EA	198	6	6	6	50	19.246	158930	492430	325680	7429.4	8891.9	8160.65	39.9086	3.4449e-11
WP_260234370.1	WP_260234370.1;WP_136001541.1;TGY58174.1	WP_260234370.1 Hsp20/alpha crystallin family protein [Limosilactobacillus reuteri];WP_136001541.1 Hsp20/alpha crystallin family protein [Limosilactobacillus reuteri];TGY58174.1 Hsp20/alpha crystallin family protein [Limosilactobacillus reuteri]	3	11	11	1	87.4	16.748	22490000	29635000	26062500	2333600	2478200	2405900	10.8327	5.1692e-10
WP_229285331.1	WP_229285331.1	WP_229285331.1 histidine phosphatase family protein [Limosilactobacillus reuteri]	1	7	1	1	37.6	24.76	112660	6166300	3139480	482940	124150	303545	10.3427	3.83249e-09
ANU51019.1	ANU51019.1;OYS47442.1;WP_003666710.1;RMX25177.1;PTV05133.1;OYS53721.1;QQR15046.1;OXE59508.1;KEQ19876.1;KEK16807.1;KEK13680.1;EDX42103.1;PIN29668.1;WLC96388.1;UUW69089.1;UIT54487.1;UIN26690.1;PUH33350.1;PUH33013.1;PTM27745.1;PTM23610.1;CUR40116.1;OUP89489.1;OUN49332.1;OON66417.1;EEI65892.1;WP_003671894.1;CUR38329.1;AEI57990.1;ABD13906.1;WP_229269306.1	ANU51019.1 YebC/PmpR family DNA-binding transcriptional regulator [Limosilactobacillus reuteri];OYS47442.1 YebC/PmpR family DNA-binding transcriptional regulator [Limosilactobacillus reuteri];WP_003666710.1 MULTISPECIES: YebC/PmpR family DNA-binding transc	31	15	1	1	72.6	27.188	2022.7	31314	16668.3	964.57	2924.9	1944.73	8.57101	0.000142125
CCC03686.1	CCC03686.1;KEK15028.1;OPG87725.1;OYT01345.1;OTA49753.1;CUU11738.1;EDX43211.1;OYS60323.1;OYS69121.1;WP_003675319.1;OYS73478.1;OYS75249.1;OYS58857.1;WP_003665056.1;PWT66745.1;WP_035169118.1;OYS72584.1;OJI10609.1;KEK14087.1;WP_107721148.1;OYS88856.1;OYT06775.1;PTV04449.1;PWT33533.1;PWT35347.1;PWT43423.1;PWT45032.1;OYT06319.1;PWT60146.1;PWT70009.1;RMX27865.1;RNF36586.1;PWT59206.1;TGB11878.1;OYT05179.…	CCC03686.1 unnamed protein product [Limosilactobacillus reuteri subsp. suis];KEK15028.1 hypothetical protein LR3_05175 [Limosilactobacillus reuteri];OPG87725.1 hypothetical protein B5D07_09370 [Limosilactobacillus reuteri];OYT01345.1 hypothetical protein C	162	6	6	3	17.6	56.25	692860	1474300	1083580	142540	110750	126645	8.55604	6.37327e-08
WP_225417135.1	WP_225417135.1;OUP90857.1;WP_229270854.1;PWT35276.1;CUU13430.1;KEK16167.1;OPG87067.1;OTA43390.1;OTA46090.1;OUN50459.1;CCC04482.1;PWT55718.1;PWT58341.1;PWT59987.1;PWT66150.1;PWT66720.1;WP_003676411.1;PWT37930.1;WP_229410628.1;QLQ62045.1;WP_181462673.1;WP_257496576.1;OUL52054.1;WP_019253582.1;WP_169482369.1;WP_135350298.1;QWS05241.1;WP_216271538.1;TGB09675.1;PWT68376.1;PWT45505.1;PWT40115.1;PWT4009…	WP_225417135.1 hypothetical protein, partial [Limosilactobacillus reuteri];OUP90857.1 hypothetical protein B5F04_00485 [Limosilactobacillus reuteri];WP_229270854.1 hypothetical protein [Limosilactobacillus reuteri];PWT35276.1 hypothetical protein DKZ24_042	37	10	10	9	43.4	33.58	2319800	864460	1592130	263130	165920	214525	7.42165	4.52235e-07
CUU13540.1	CUU13540.1;OTA46133.1;OUN50383.1;OUP90808.1;WP_003676516.1;WP_087214258.1;CCC04533.1;OPG87257.1;WP_079376343.1;TGB10348.1;WP_135350235.1;WP_229270829.1;WP_035168422.1;PWT66677.1;QWS05290.1;PWT38110.1;WP_109883906.1;WP_109897295.1;PWT60029.1;PWT66193.1;WP_216271604.1;PWT58110.1;PWT55760.1;PWT41037.1;PWT37545.1;WP_169482546.1;KEK16128.1;PWT35318.1	CUU13540.1 conserved hypothetical protein (plasmid) [Limosilactobacillus reuteri subsp. suis];OTA46133.1 hypothetical protein BHL74_00450 [Limosilactobacillus reuteri];OUN50383.1 hypothetical protein B5G22_00165 [Limosilactobacillus reuteri];OUP90808.1 hyp	28	9	9	9	43.8	36.118	2391700	695080	1543390	195770	229170	212470	7.26404	6.01167e-07
WP_134988272.1	WP_134988272.1;AWD61482.1	WP_134988272.1 CopG family transcriptional regulator [Limosilactobacillus reuteri];AWD61482.1 hypothetical protein LWHH1689_0116 [Limosilactobacillus reuteri]	2	2	2	2	26.4	6.03	1249300	663540	956420	165850	111550	138700	6.8956	0.000660557
WP_085719402.1	WP_085719402.1	WP_085719402.1 Asp-tRNA(Asn)/Glu-tRNA(Gln) amidotransferase subunit GatA [Limosilactobacillus reuteri]	1	31	1	1	68	53.052	138580	74142	106361	11944	21828	16886	6.29877	0.00119791
WP_285143054.1	WP_285143054.1;UGQ32309.1;WP_260241154.1;WP_229408533.1;WP_229286160.1;WP_229281210.1;WP_229275372.1;WP_229272859.1;WP_229270665.1;WP_229269104.1;WP_169471067.1;WP_085719347.1;WP_162216357.1;WP_152720500.1;WP_152719118.1;WP_134989460.1;WP_134907278.1;WP_122481526.1;WP_113897319.1;WP_099979672.1;PTV03696.1;QDR71971.1;WP_085678964.1;UFK67797.1;WP_019253161.1;PWT47505.1;WP_019252689.1;WP_016496582.1…	WP_285143054.1 MerR family transcriptional regulator [Limosilactobacillus reuteri];UGQ32309.1 MerR family transcriptional regulator [Limosilactobacillus reuteri];WP_260241154.1 MerR family transcriptional regulator [Limosilactobacillus reuteri];WP_22940853	182	1	1	1	8.8	17.127	48342	50488	49415	6435.1	11225	8830.05	5.59623	0.0025075
PWT39386.1	PWT39386.1;PWT45458.1;PWT55803.1;PWT57262.1;PWT58070.1;PWT64883.1;PWT66236.1;PWT68209.1;QLQ61958.1;WP_109956862.1;TGB10387.1;WP_003676633.1;WP_065868970.1;WP_109884748.1;WP_109937394.1;WP_109954684.1;PWT39571.1;CCC04596.1;OUP87215.1;CUU13476.1;KEK16085.1;OCW70355.1;OCW71508.1;OTA46051.1;OTA51582.1;PWT68239.1;OUL52002.1;OYS80628.1;OYS81387.1;OYS83706.1;PWT34026.1;PWT34475.1;OUN50418.1;WP_229410569…	PWT39386.1 hypothetical protein DKZ22_11005, partial [Limosilactobacillus reuteri];PWT45458.1 hypothetical protein DKZ25_00045 [Limosilactobacillus reuteri];PWT55803.1 hypothetical protein DKZ31_01605 [Limosilactobacillus reuteri];PWT57262.1 hypothetical p	34	2	2	2	43.4	9.8446	430300	272850	351575	53799	72389	63094	5.57224	0.00257357
AGN99035.1	AGN99035.1;OYS96042.1;OYS48660.1;CUR37906.1;CUR44050.1;CUU12398.1;EDX43633.1;KEK16198.1;KEQ20834.1;OCX48223.1;OJI11464.1;OPG88289.1;AMY14956.1;OTA44185.1;OTA47802.1;OTA48474.1;OTA51400.1;OTA57025.1;OTA71987.1;OTA72742.1;OTA75513.1;OTA78439.1;OTA81933.1;OYS50955.1;OYS77649.1;OYS75145.1;OYS71180.1;WP_016496731.1;CCC03875.1;OYS58915.1;OYS59981.1;OYS63406.1;OYS63700.1;OYS67270.1;OYS69499.1;OYS70808.1…	AGN99035.1 ArpR family protein [Limosilactobacillus reuteri I5007];OYS96042.1 DNA-binding protein [Limosilactobacillus reuteri];OYS48660.1 DNA-binding protein [Limosilactobacillus reuteri];CUR37906.1 Phage DNA binding protein [Limosilactobacillus reuteri];	196	3	3	1	35.3	13.637	135370	157840	146605	23932	30747	27339.5	5.36239	0.0032386
WP_087214254.1	WP_087214254.1;WP_087356019.1;OTA46132.1;OUN50382.1;OUP90809.1;TGB10347.1;WP_003676514.1;WP_135350234.1;CUU13541.1;WP_229270830.1;CCC04532.1;OPG87256.1;WP_079376342.1;WP_260241220.1;PWT58109.1;PWT66192.1;PWT60028.1;PWT66678.1;QWS05289.1;WP_229280926.1;PWT67816.1;WP_109897296.1;PWT55759.1;UUW69596.1;WP_019253537.1;OUL52096.1;WP_109883904.1;PWT37544.1;WP_169482548.1;WP_181462640.1;WP_216271602.1;QL…	WP_087214254.1 hypothetical protein [Limosilactobacillus reuteri];WP_087356019.1 hypothetical protein [Limosilactobacillus reuteri];OTA46132.1 hypothetical protein BHL74_00445 [Limosilactobacillus reuteri];OUN50382.1 hypothetical protein B5G22_00160 [Limos	41	9	9	9	31.7	43.754	1143000	731250	937125	141240	211650	176445	5.31115	2.75404e-05
EDX43052.1	EDX43052.1;OYS78067.1;WP_003675030.1;WP_003672404.1;WLR78981.1;WJK30019.1;UZM90528.1;UIT53603.1;UIN25626.1;UCN19576.1;UCN17810.1;TGY64608.1;RNF36718.1;QWS03897.1;RMX25412.1;QQR14110.1;QKT14685.1;QDK47900.1;PWT68339.1;PWT63412.1;PWT62212.1;PWT61819.1;PWT57234.1;PWT56784.1;WP_170090622.1;OYS76450.1;WP_109897642.1;PWT51794.1;PWT50547.1;PWT46149.1;PWT39961.1;PWT39532.1;PWT36380.1;PWT33785.1;PWT31601.…	EDX43052.1 CsbD family protein [Limosilactobacillus reuteri subsp. rodentium];OYS78067.1 CsbD family protein [Limosilactobacillus reuteri];WP_003675030.1 MULTISPECIES: CsbD family protein [Limosilactobacillus];WP_003672404.1 CsbD family protein [Limosilact	109	3	3	3	23.7	6.5254	1071400	823560	947480	142150	220520	181335	5.22503	3.30669e-05
WP_087214248.1	WP_087214248.1;WP_003676510.1;TGB10345.1;OUP90811.1;OUN50380.1;OTA46130.1;CUU13543.1;CCC04530.1;WP_260241218.1;WP_079376340.1;OPG87254.1	WP_087214248.1 hypothetical protein [Limosilactobacillus reuteri];WP_003676510.1 hypothetical protein [Limosilactobacillus reuteri];TGB10345.1 hypothetical protein E5F87_07735 [Limosilactobacillus reuteri];OUP90811.1 hypothetical protein B5F04_00250 [Limos	11	7	7	7	48.4	22.042	833250	465310	649280	127100	124170	125635	5.16799	0.00402245
OPG88290.1	OPG88290.1;AGN99034.1;OJI11463.1;RNF37112.1;QKT15220.1;QDK48406.1;OTA81934.1;WP_003675622.1;VTZ91726.1;UZM91026.1;UCN20004.1;UCN18238.1;CCC03876.1;CUR37907.1;CUR44051.1;CUU12397.1;OTA82598.1;OTA61317.1;OTA44186.1;OTA45598.1;AMY14955.1;OTA47803.1;OTA51401.1;OTA57026.1;OTA66860.1;OTA72743.1;OTA74963.1;OTA75512.1;OTA78438.1;OTA48473.1;OCX48222.1;OUL53310.1;ANU51487.1;OON61381.1;OFB59914.1;WLR79572.1…	OPG88290.1 hypothetical protein B5D07_05985 [Limosilactobacillus reuteri];AGN99034.1 hypothetical protein LRI_0825 [Limosilactobacillus reuteri I5007];OJI11463.1 hypothetical protein BJI45_01905 [Limosilactobacillus reuteri];RNF37112.1 hypothetical protein	182	5	5	5	66.2	8.5506	6905700	8041700	7473700	1587600	1312900	1450250	5.15339	1.87686e-05
ABQ83784.1	ABQ83784.1;OTA75943.1;OTA84051.1;OTA86226.1;OUL52604.1;OXE60425.1;OTA71049.1;OCX49207.1;OCW69243.1;OCW68290.1;AGN98632.1;AGR64683.1;AKP01751.1;AMY14480.1;ANU51842.1;AXX74679.1;BAG25965.1;CCC03436.1;CUR36960.1;CUR42619.1;CUU12014.1;EEI09422.1;EGC14388.1;KGE72240.1;KRK51965.1;OTA82681.1;OTA75331.1;OCW62749.1;OTA73330.1;WP_065533259.1;WP_098047188.1;WP_102817044.1;WP_134907973.1;WP_152702387.1;WP_15…	ABQ83784.1 hypothetical protein Lreu_1539 [Limosilactobacillus reuteri subsp. reuteri];OTA75943.1 hypothetical protein BHL81_02160 [Limosilactobacillus reuteri];OTA84051.1 hypothetical protein BHL84_02110 [Limosilactobacillus reuteri];OTA86226.1 hypothetic	183	7	7	7	47.3	16.827	753620	825500	789560	147340	161280	154310	5.11671	0.0042618
ABQ83924.1	ABQ83924.1;WP_124216198.1;PTV04058.1;OTA50710.1;OTA46737.1;OTA44486.1;OTA44364.1;CUR37946.1;CUR38205.1;CUR40229.1;CUR43967.1;CUU11896.1;EDX43117.1;EEI09276.1;EGC14537.1;QBE46307.1;KEK13994.1;KEK14896.1;KEQ21098.1;AMY14376.1;KGE72600.1;KRK49649.1;OAV47599.1;OJI10765.1;OPG87860.1;PTS30180.1;PTS16599.1;QDK47851.1;OXE60281.1;WP_168240690.1;WP_223659386.1;WP_229267393.1;WP_260245622.1;WP_271901288.1;W…	ABQ83924.1 amino acid/polyamine/organocation transporter, APC superfamily [Limosilactobacillus reuteri subsp. reuteri];WP_124216198.1 APC family permease [Limosilactobacillus reuteri];PTV04058.1 APC family permease [Limosilactobacillus reuteri];OTA50710.1	185	3	3	3	8	49.589	273790	475370	374580	92458	63510	77984	4.80329	0.00610386
WP_228341441.1	WP_228341441.1	WP_228341441.1 hypothetical protein [Limosilactobacillus reuteri]	1	1	1	1	1	209.14	2789400	1759000	2274200	1109.7	969330	485220	4.68695	0.000106929
UAW62326.1	UAW62326.1;OTA46758.1;CCC03518.1;CUR43989.1;CUU11919.1;EEI09250.1;EGC14511.1;KRK50460.1;OAV47625.1;OCX49320.1;OFB58530.1;OJI10788.1;OTA50734.1;UCN19548.1;OTA52340.1;OTA53765.1;OTA58107.1;OTA64383.1;OTA69725.1;OTA74215.1;UNL36649.1;UPG77811.1;ABQ83898.1;UZM90502.1;BAG26064.1;AKP01869.1;OTA77174.1;OTA79700.1;RNF36691.1;OTA84363.1;PTS16573.1;PTS30154.1;PWT30385.1;PWT40455.1;PWT44912.1;PWT47067.1;PWT…	UAW62326.1 glucose 1-dehydrogenase [Limosilactobacillus reuteri];OTA46758.1 3-oxoacyl-ACP reductase [Limosilactobacillus reuteri];CCC03518.1 alcohol dehydrogenase [Limosilactobacillus reuteri subsp. suis];CUR43989.1 Glucose 1-dehydrogenase [Limosilactobaci	200	14	14	9	60.6	26.923	10018000	11492000	10755000	2365100	2277900	2321500	4.63278	6.28884e-05
WP_109884551.1	WP_109884551.1;PWT66643.1;PWT63321.1;PWT58526.1;PWT53681.1;PWT35251.1;WP_225417173.1;WP_152702756.1;WP_229392083.1;WP_217324362.1	WP_109884551.1 lytic transglycosylase [Limosilactobacillus reuteri];PWT66643.1 lytic transglycosylase [Limosilactobacillus reuteri];PWT63321.1 lytic transglycosylase [Limosilactobacillus reuteri];PWT58526.1 lytic transglycosylase [Limosilactobacillus reute	10	2	2	1	1	225.17	102840	213300	158070	41541	27606	34573.5	4.572	0.00801073
AGN98921.1	AGN98921.1;OTA74103.1;OTA49833.1;OTA59822.1;WP_016496693.1;CUU12284.1;AMY14754.1;OPG88218.1;OTA51005.1;OTA73236.1;OTA63416.1;OTA44885.1;OTA49574.1;OTA66969.1;OTA76617.1;OTA76702.1;OTA71388.1;OTA89769.1;CUR37192.1;QDK48248.1;WP_229280714.1;UZM91122.1;RNF37004.1;CUR41730.1;CCC03988.1;OTA46211.1;WP_086142139.1;WP_003675770.1;OTA83468.1;OTA89010.1;OJI11351.1;WP_117114933.1;QKT16189.1;WP_086118232.1;W…	AGN98921.1 aldo/keto reductase [Limosilactobacillus reuteri I5007];OTA74103.1 oxidoreductase [Limosilactobacillus reuteri];OTA49833.1 oxidoreductase [Limosilactobacillus reuteri];OTA59822.1 oxidoreductase [Limosilactobacillus reuteri];WP_016496693.1 aldo/k	158	13	13	13	53.8	36.393	12607000	14938000	13772500	3156000	2959100	3057550	4.50442	8.54678e-05
OTA73109.1	OTA73109.1;OTA85271.1;CUU12177.1;OJI11043.1;OPG88113.1;OTA42673.1;OTA45945.1;OTA49874.1;OTA51711.1;OTA60163.1;OTA66330.1;OTA66371.1;OTA73898.1;OTA79737.1;UCN18027.1;UCN19794.1;UZM90806.1;VTZ91446.1;WP_003674767.1;WP_170090736.1;CCC03285.1;WP_229283070.1;OTA78037.1;OTA52413.1;AGN98810.1;AMY14650.1;CUR37810.1;WP_174891809.1;CUR42775.1;QKT14880.1;QDK48099.1;OTA91242.1;WP_016496633.1;WP_086142409.1;O…	OTA73109.1 recombination regulator RecX [Limosilactobacillus reuteri];OTA85271.1 recombination regulator RecX [Limosilactobacillus reuteri];CUU12177.1 Regulatory protein RecX [Limosilactobacillus reuteri subsp. suis];OJI11043.1 recombination regulator RecX	232	6	6	5	36	31.107	645530	287260	466395	37905	171790	104848	4.44832	0.00928688
WP_257496610.1	WP_257496610.1;WP_229410598.1;WP_229270824.1;WP_216271620.1;WP_135350240.1;WP_109937458.1;WP_087214278.1;WP_086142038.1;WP_003676542.1;UNL36931.1;TGB10358.1;QWS05300.1;PWT67846.1;PWT45562.1;PWT38588.1;PWT34130.1;OUP90797.1;OUN50395.1;OTA46143.1;OTA44045.1;OPG87584.1;CUU13528.1;CCC04545.1	WP_257496610.1 nicotinamide riboside transporter PnuC [Limosilactobacillus reuteri];WP_229410598.1 nicotinamide riboside transporter PnuC [Limosilactobacillus reuteri];WP_229270824.1 nicotinamide riboside transporter PnuC [Limosilactobacillus reuteri];WP_2	23	1	1	1	4.1	30.198	290270	137720	213995	56417	43728	50072.5	4.2737	0.0114764
CUU11984.1	CUU11984.1;CUR37602.1;QKT14712.1;WP_003674981.1;WP_229276575.1;CCC03459.1;WP_229280812.1;OJI10861.1;OTA48844.1;OTA58528.1;OTA78150.1;CUR44200.1;QDK47930.1;RNF36750.1;UZM90579.1;VTZ88682.1;WP_072575313.1;WP_086132491.1;WP_086141373.1;OPG87937.1;WP_142490305.1;OTA74799.1;OTA87054.1;WP_134989499.1;AWD63103.1;PWT46098.1;PWT61756.1;WP_134907666.1;WP_229306353.1;WP_113897273.1;WP_065533273.1;QQR14174.1…	CUU11984.1 glycosyl hydrolase family 8 protein [Limosilactobacillus reuteri subsp. suis];CUR37602.1 Beta-glucanase precursor [Limosilactobacillus reuteri];QKT14712.1 beta-glucanase [Limosilactobacillus reuteri];WP_003674981.1 glycosyl hydrolase family 8 [L	242	8	8	8	31.7	43.943	204980	66303	135642	29595	34257	31926	4.24862	0.0118342
OTA87313.1	OTA87313.1;AXX74407.1;OTA72329.1;OTA68883.1;OTA57591.1;OTA51357.1;OTA50826.1;OTA45340.1;OPG87694.1;OTA77477.1;OJI10572.1;CUU11689.1;CUR42459.1;CUR37886.1;CCC03730.1;AMY14184.1;QKT14504.1;OTA73122.1;OTA78755.1;VTZ90998.1;WP_169471654.1;WP_113897112.1;WP_003675390.1;UZM90349.1;OTA78860.1;UCN19395.1;UCN17630.1;RNF36548.1;QDK47726.1;OTA82468.1;OTA45252.1;OTA61671.1;AGN98366.1;OON61817.1;WP_113898031.…	OTA87313.1 NAD-dependent dehydratase [Limosilactobacillus reuteri];AXX74407.1 NAD-dependent epimerase/dehydratase family protein [Limosilactobacillus reuteri];OTA72329.1 NAD-dependent dehydratase [Limosilactobacillus reuteri];OTA68883.1 NAD-dependent dehyd	168	14	14	14	81.2	24.12	6769200	7281200	7025200	1765400	1625000	1695200	4.14417	0.000206087
CUU13475.1	CUU13475.1;CCC04597.1;WP_229280860.1;WP_019253491.1;OUL52003.1;WP_239834992.1;WP_238594803.1;WP_225415496.1;WP_181462607.1;QLQ61957.1;WP_019253490.1;OUL52004.1;WP_225358021.1	CUU13475.1 hypothetical phage protein (plasmid) [Limosilactobacillus reuteri subsp. suis];CCC04597.1 putative phosphoglycerophosphatase A [Limosilactobacillus reuteri subsp. suis];WP_229280860.1 phosphatidylglycerophosphatase A [Limosilactobacillus reuteri	13	7	7	7	23.5	44.098	892440	416680	654560	128250	195780	162015	4.04012	0.0153193
WP_225360898.1	WP_225360898.1;OYS51413.1;OTA60145.1;OTA66348.1;OTA66389.1;OTA73091.1;OTA73916.1;OTA76324.1;OTA78019.1;OTA85253.1;OYS67945.1;OTA88276.1;OTA91260.1;OXE60543.1;OYS49464.1;OYS49754.1;OYS53999.1;OTA51729.1;OYS55478.1;OYS56840.1;OYS63709.1;OTA45963.1;OTA79719.1;OTA42655.1;EEI09540.1;AGN98791.1;AKP01607.1;AMY14632.1;ANU51725.1;BAG25832.1;CCC03304.1;CUR37829.1;OTA52395.1;OTA49278.1;CUU12158.1;WP_1527029…	WP_225360898.1 GNAT family N-acetyltransferase, partial [Limosilactobacillus reuteri];OYS51413.1 GNAT family N-acetyltransferase [Limosilactobacillus reuteri];OTA60145.1 GNAT family N-acetyltransferase [Limosilactobacillus reuteri];OTA66348.1 GNAT family N	209	2	2	2	17.8	17.205	91696	105570	98633	40738	8916.4	24827.2	3.97278	0.0166699
WP_003674965.1	WP_003674965.1;VTZ88660.1;OTA78156.1;OTA64994.1;OPG87947.1;OJI10870.1;CUR44188.1;CCC03449.1	WP_003674965.1 NAD(P)H-dependent oxidoreductase [Limosilactobacillus reuteri];VTZ88660.1 FMN-dependent NADH-azoreductase [Limosilactobacillus reuteri];OTA78156.1 NAD(P)H dehydrogenase (quinone) [Limosilactobacillus reuteri];OTA64994.1 NAD(P)H dehydrogenase	8	4	4	1	48.9	14.903	245050	269210	257130	68279	61972	65125.5	3.94822	0.017194
CCC04543.1	CCC04543.1;OCW67421.1;WP_085679350.1;WP_086142037.1;WP_065869169.1;CUU13530.1;WP_003676537.1;OTA46142.1;OTA44046.1;OCW68412.1;OYS81424.1;OYS83743.1;WP_094509125.1;WP_229280936.1;OYS80591.1;WP_260241223.1;WP_109975895.1;WP_181462631.1;OUL51971.1;WP_109884039.1;WP_086879169.1;QLQ61989.1;PWT59961.1;PWT37213.1;WP_135350239.1;TGB10357.1;UUW69585.1;WP_219285555.1;WP_109883926.1;PWT35328.1;PWT37555.1;PW…	CCC04543.1 putative antiproliferative protein [Limosilactobacillus reuteri subsp. suis];OCW67421.1 hypothetical protein BBP13_09340 [Limosilactobacillus reuteri];WP_085679350.1 prohibitin family protein [Limosilactobacillus reuteri];WP_086142037.1 prohibit	37	4	4	4	22.3	29.269	868870	422790	645830	178250	159300	168775	3.82657	0.0200654
PWT39617.1	PWT39617.1;OTA46026.1;CUR36645.1;CUR43857.1;CUU13369.1;EGC14932.1;KRK50407.1;OAV47128.1;OJI10413.1;OPG89323.1;AKP00346.1;AMY14007.1;OTA51443.1;BAG24629.1;OTA56088.1;OTA58754.1;PWT69168.1;PTS28237.1;QDK49402.1;WP_004562439.1;WP_086142256.1;WP_172468149.1;UZM90173.1;OTA48140.1;CCC04087.1;OTA43380.1;VTZ88744.1;PWT32621.1;PWT37162.1;PWT34946.1;OTA72191.1;OTA78246.1;OTA79778.1;OTA81442.1;OTA88807.1;OT…	PWT39617.1 branched-chain amino acid ABC transporter permease [Limosilactobacillus reuteri];OTA46026.1 branched-chain amino acid ABC transporter permease [Limosilactobacillus reuteri];CUR36645.1 branched-chain amino acid transport protein [Limosilactobacil	207	5	5	5	11.9	33.718	359140	266500	312820	44855	120070	82462.5	3.79348	0.020933
OYS46999.1	OYS46999.1;OYS71226.1;OYS53130.1;WP_191981479.1;OYS55022.1;OYS86851.1;OYS61069.1;OYS62475.1;OYS85248.1;OYS66059.1;OYS56380.1;OYS83438.1;OYS49166.1;OYS74106.1;OYS76429.1;OYS78046.1;OYS80102.1;OYS67012.1;OYS70000.1;WP_267493804.1;WP_153707046.1;WP_228341595.1;OYS50545.1;OYS80014.1;OYS97117.1;WP_019251528.1;OYS95010.1;OYS99958.1;OYS87069.1;OYT05245.1;OYT08367.1;OYT08736.1;OYT10078.1;OYS94655.1;TGY64…	OYS46999.1 amino acid permease [Limosilactobacillus reuteri];OYS71226.1 amino acid permease [Limosilactobacillus reuteri];OYS53130.1 amino acid permease [Limosilactobacillus reuteri];WP_191981479.1 APC family permease, partial [Limosilactobacillus reuteri]	163	5	5	5	12.4	51.886	391520	501510	446515	108590	127380	117985	3.78451	0.0211752
ANU51851.1	ANU51851.1;UCN17850.1;WP_181462702.1;QWS03819.1;CUR42602.1;CUR39801.1;TGY45060.1;WP_216578308.1;QKT14720.1;WP_078009612.1;WP_065533265.1;WP_035153729.1;UUW68137.1;QQR14186.1;WP_229278727.1;PWT37504.1;PWT30276.1;PTM29106.1;PTM27175.1;OXE60414.1;OON64955.1;KEQ20139.1;WP_135951815.1;WP_153703280.1;WP_174891797.1;WP_285227584.1;WP_229286786.1;WP_229277650.1;WP_229270572.1;WP_228340887.1;WP_229284938.…	ANU51851.1 NAD(P)H dehydrogenase [Limosilactobacillus reuteri];UCN17850.1 flavodoxin family protein [Limosilactobacillus reuteri];WP_181462702.1 flavodoxin family protein [Limosilactobacillus reuteri];QWS03819.1 flavodoxin family protein [Limosilactobacill	196	4	1	1	41.3	19.95	53377	55160	54268.5	13545	15370	14457.5	3.75366	0.0220311
WP_225415656.1	WP_225415656.1;CCC04150.1;OTA80914.1;CUR36841.1;OTA78815.1;CUR42368.1;WP_086120108.1;WP_079375826.1;WP_004562497.1;UZM90232.1;CUU11555.1;OJI10468.1;OTA46678.1;OPG89450.1;OTA53145.1;AMY14062.1;OTA76043.1;OTA64441.1;OTA73837.1;OTA74899.1;OTA84905.1;OTA88327.1;WP_080549744.1;WP_217324476.1;WP_191995361.1;PWT49788.1;UYQ75064.1;WP_085649820.1;PWT45872.1;UCN19280.1;WP_080637860.1;OYS49443.1;WP_08568086…	WP_225415656.1 polyphosphate kinase 2 family protein [Limosilactobacillus reuteri];CCC04150.1 conserved hypothetical protein [Limosilactobacillus reuteri subsp. suis];OTA80914.1 phosphate--nucleotide phosphotransferase [Limosilactobacillus reuteri];CUR3684	191	13	13	13	56.8	29.456	2796700	2644600	2720650	829030	679420	754225	3.60721	0.00134104
OPG87654.1	OPG87654.1;OTA42610.1;OTA62982.1;OTA56565.1;OTA49988.1;OTA48996.1;OTA85868.1;OTA45051.1;KEQ20952.1;OTA43609.1;KEK14152.1;KEK13794.1;EDX43281.1;CUU11654.1;CUR43459.1;CCC03761.1;OTA63940.1;OTA71822.1;OTA72521.1;OTA76905.1;OTA77449.1;OTA79594.1;WP_229308791.1;WP_229271582.1;OYS53205.1;AGN98329.1;OON61566.1;CUR39857.1;WP_107690454.1;PTM29295.1;PTM27442.1;WP_078009932.1;UFK65420.1;AMY14154.1;CUR37991.…	OPG87654.1 LysR family transcriptional regulator [Limosilactobacillus reuteri];OTA42610.1 transcriptional regulator [Limosilactobacillus reuteri];OTA62982.1 transcriptional regulator [Limosilactobacillus reuteri];OTA56565.1 transcriptional regulator [Limos	124	3	3	3	11.8	32.881	92991	127860	110426	42042	19248	30645	3.60338	0.0267685
WP_225417199.1	WP_225417199.1;PWT58528.1;PWT66645.1;WP_019251705.1;WP_229306426.1;WP_229305703.1;WP_229268404.1;WP_144227300.1;WP_109884553.1;WP_087214741.1;QDR72911.1;WP_079376039.1;WP_229394071.1;UFK69283.1;UFK66748.1;UAW61317.1;TGY61996.1;RMX24379.1;QLQ61774.1;QLL76207.1;UUW69484.1;OPG88521.1;OYS55891.1;OTA47645.1;WP_109956898.1;PWT41488.1;WP_109962682.1;WP_230213163.1;OUP89767.1;PWT53683.1;PWT35253.1;OYS694…	WP_225417199.1 DUF6096 family protein, partial [Limosilactobacillus reuteri];PWT58528.1 hypothetical protein DKZ30_07845 [Limosilactobacillus reuteri];PWT66645.1 hypothetical protein DKZ28_04745 [Limosilactobacillus reuteri];WP_019251705.1 MULTISPECIES: DU	43	1	1	1	14.9	10.326	483410	1229600	856505	335000	143360	239180	3.58101	0.0275629
OTA62522.1	OTA62522.1;WP_251939302.1;OTA74774.1;OTA77426.1;CUU12228.1;CCC04042.1;AMY14702.1;OJI11298.1;WP_142499119.1;OPG88201.1;CUR36591.1;QKT14925.1;WP_003675859.1;CUR41986.1;OTA45236.1;OTA62927.1;OTA49627.1;OTA46340.1;OTA83519.1;QDK48197.1;UCN18074.1;RNF36951.1;OTA51423.1;UCN19841.1;UZM90858.1;AGN98861.1;OTA60213.1;OTA79942.1;VTZ92302.1;OTA73376.1;OTA74152.1;OTA83278.1;PWT62828.1;PWT43785.1;PWT32139.1;PW…	OTA62522.1 hypothetical protein BHL75_01350 [Limosilactobacillus reuteri];WP_251939302.1 hypothetical protein [Limosilactobacillus reuteri];OTA74774.1 hypothetical protein BHL79_06660 [Limosilactobacillus reuteri];OTA77426.1 hypothetical protein BHL80_0741	140	5	5	5	20.6	33.242	824940	1035900	930420	251070	269450	260260	3.57496	0.00145172
WP_228340932.1	WP_228340932.1	WP_228340932.1 replication initiation protein [Limosilactobacillus reuteri]	1	1	1	1	5.8	29.493	39337	409780	224558	82100	45380	63740	3.52304	0.0297416
WP_003676730.1	WP_003676730.1;CUU12455.1;CCC04636.1	WP_003676730.1 acyltransferase family protein [Limosilactobacillus reuteri];CUU12455.1 conserved hypothetical membrane protein [Limosilactobacillus reuteri subsp. suis];CCC04636.1 conserved hypothetical protein [Limosilactobacillus reuteri subsp. suis]	3	2	2	2	7.2	39.436	235530	201270	218400	123180	2878.8	63029.4	3.46505	0.0321076
CCC04459.1	CCC04459.1;WP_109937407.1;CUU13453.1;PWT34699.1;PWT55695.1;PWT57986.1;PWT58876.1;PWT45482.1;PWT66127.1;WP_003676367.1;PWT34050.1;PWT65669.1;WP_181462686.1;OPG87089.1;OUP90879.1;QLQ62067.1;WP_079376380.1;OTA46068.1;WP_087356082.1;KEK16062.1;WP_135350265.1;WP_219285494.1;WP_229270866.1;WP_229286604.1;WP_229410634.1;WP_257496654.1;WP_087214378.1;UUW69665.1;OUL52032.1;WP_035168293.1;WP_169482328.1;TG…	CCC04459.1 hypothetical protein LRATCC53608_1706 [Limosilactobacillus reuteri subsp. suis];WP_109937407.1 hypothetical protein [Limosilactobacillus reuteri];CUU13453.1 hypothetical protein LRATCC53608_pI035 (plasmid) [Limosilactobacillus reuteri subsp. sui	41	6	6	6	18.8	49.786	522920	135000	328960	98889	97440	98164.5	3.35111	0.0373668
CUU13539.1	CUU13539.1;WP_229270828.1;OTA46168.1;WP_229307410.1;WP_229410602.1;WP_225358026.1;OUN50384.1;OUP90807.1;WP_239834990.1;WP_239879263.1;CCC04534.1;WP_003676518.1;TGB10413.1;OPG87258.1;WP_225359294.1;WP_225428844.1;WP_257536267.1;WP_225418049.1;WP_257496603.1;WP_225414911.1;WP_243466844.1;WP_231124890.1;WP_229280928.1;WP_225437857.1;WP_225415874.1;WP_253202454.1;WP_100068887.1;PWT45595.1;PWT35332.1;…	CUU13539.1 hypothetical protein LRATCC53608_pI127 (plasmid) [Limosilactobacillus reuteri subsp. suis];WP_229270828.1 hypothetical protein [Limosilactobacillus reuteri];OTA46168.1 hypothetical protein BHL74_00455 [Limosilactobacillus reuteri];WP_229307410.1	50	7	7	7	21	49.053	497320	192640	344980	113390	93948	103669	3.32771	0.0385575
ABQ84130.1	ABQ84130.1;WP_065867381.1;OTA63952.1;OUP88616.1;OUN48405.1;OTA85856.1;OTA81817.1;OTA79582.1;OTA77461.1;OTA76832.1;OTA71248.1;OTA68867.1;TGY58342.1;TSB18774.1;UAW62497.1;UZM90324.1;UYQ75002.1;OXE60108.1;OTA50169.1;OTA43864.1;OYS45095.1;AMY14167.1;OAV46344.1;AGN98346.1;OYS49026.1;OYS47754.1;OTA53488.1;OYS65294.1;OYS52538.1;OYS65253.1;OYS62564.1;OYS60375.1;OYS57462.1;OYS54595.1;OYS54322.1;UXE89264.1…	ABQ84130.1 glutamine amidotransferase class-I [Limosilactobacillus reuteri subsp. reuteri];WP_065867381.1 type 1 glutamine amidotransferase [Limosilactobacillus reuteri];OTA63952.1 GMP synthase [Limosilactobacillus reuteri];OUP88616.1 GMP synthase [Limosil	208	5	5	5	40.8	25.353	1055800	1278400	1167100	320320	403760	362040	3.22368	0.00349367
UZM90517.1	UZM90517.1;OTA46492.1;WP_072575298.1;OTA92740.1;WP_086131498.1;WP_174891790.1;WP_241545345.1;WP_302499778.1;OTA46773.1;OJI10802.1;CUR44005.1;WP_003675046.1;WP_123072442.1;CUU11935.1;OTA89941.1;OTA77189.1;AMY14415.1;CCC03502.1;OTA49673.1;VTZ90634.1;OTA54410.1;OTA64368.1;OTA52969.1;OTA84348.1;OTA77098.1;OTA76271.1;UCN17798.1;OTA74583.1;UCN19564.1;OTA72457.1;OTA58232.1;AGN98555.1;OTA58122.1;QKT14673…	UZM90517.1 hypothetical protein OP870_01660 [Limosilactobacillus reuteri];OTA46492.1 hypothetical protein BHL74_03925 [Limosilactobacillus reuteri];WP_072575298.1 hypothetical protein [Limosilactobacillus reuteri];OTA92740.1 hypothetical protein BHL83_0285	197	2	2	2	6	49.03	101960	99308	100634	24156	38370	31263	3.21895	0.0446515
CCC03683.1	CCC03683.1;CUU11741.1;WP_003675312.1;OTA66983.1;OTA60506.1;ABQ84066.1;AGN98416.1;AKP02041.1;AMY14224.1;ANU52103.1;BAG26228.1;CUR38036.1;CUR42986.1;EDX43208.1;OTA73541.1;QBE46449.1;EEI09146.1;KEK15031.1;OAV46906.1;OJI10612.1;OPG87722.1;OTA46460.1;OTA46666.1;OTA49750.1;OTA51200.1;OTA51569.1;PWT41984.1;OYS88853.1;OYS75246.1;OYS73475.1;UHC31198.1;OTA80035.1;OTA84754.1;OTA87189.1;OTA91537.1;OXE60167.1…	CCC03683.1 putative U34 dipeptidase [Limosilactobacillus reuteri subsp. suis];CUU11741.1 Probable dipeptidase [Limosilactobacillus reuteri subsp. suis];WP_003675312.1 C69 family dipeptidase [Limosilactobacillus reuteri];OTA66983.1 peptidase C69 [Limosilact	222	6	6	3	15.3	54.374	451970	485450	468710	135050	156350	145700	3.21695	0.0447726
AGO00090.1	AGO00090.1;CUU13407.1;CCC04123.1;WP_004562473.1;WP_229278967.1;OYS94284.1;OYS92199.1;OYS88240.1;OYS85296.1;OYS84881.1;OYS81992.1;OYS65819.1;OYS65751.1;OCW70031.1;OYS57357.1;OYS51985.1;QDK49432.1;WP_063164294.1;RMX26550.1;QKT16154.1;WP_035152063.1;WP_094560993.1;OYS49419.1;WP_229276812.1;OYS96420.1;KEK15725.1;WP_229286769.1;WP_229407556.1;OYS56712.1;OYS45849.1;OYS48998.1;WP_229282367.1;OTA88835.1;…	AGO00090.1 aldo-keto reductase [Limosilactobacillus reuteri I5007];CUU13407.1 aldo-keto reductase family protein [Limosilactobacillus reuteri subsp. suis];CCC04123.1 aldo-keto reductase [Limosilactobacillus reuteri subsp. suis];WP_004562473.1 aldo/keto red	170	17	17	17	64.5	32.294	10672000	11437000	11054500	3594800	3323100	3458950	3.19591	0.00240738
AAF25576.1	AAF25576.1;CUU13332.1;WP_085954359.1;OJI10377.1;WP_072575189.1;OTA71861.1;WP_216578331.1;CCC03122.1;WP_086120688.1;OTA54737.1;OTA51438.1;WP_086141895.1;WP_086136113.1;OTA80965.1;OTA77085.1;WP_086143079.1;OTA68946.1;WP_086143075.1;OTA69848.1;OPG86560.1;WP_079376415.1;OTA68157.1;WP_086143109.1;OTA79744.1;WP_086141517.1;OPG85710.1;pdb|3I57|A;pdb|3I57|B;OPG86384.1;OPG86648.1;WP_143449069.1;OPG86756.1…	AAF25576.1 mucus binding protein precursor [Limosilactobacillus reuteri 1063];CUU13332.1 mucus binding protein [Limosilactobacillus reuteri subsp. suis];WP_085954359.1 YSIRK-type signal peptide-containing protein [Limosilactobacillus reuteri];OJI10377.1 hy	37	40	40	40	26.8	357.95	11148000	6528400	8838200	2835200	2750500	2792850	3.16458	0.00262033
OTA43063.1	OTA43063.1;UAW60878.1;WP_142499345.1;QPB65967.1;WP_109883415.1;WP_229270598.1;WP_162216261.1;WP_229407544.1;WP_229304200.1;WP_229307118.1;WP_107721647.1;WP_109913640.1;WP_122481133.1;WP_229304604.1;WP_123835317.1;QDR72831.1;QQR14974.1;WP_229269849.1;WP_153704975.1;WP_223659628.1;WP_229267813.1;WP_169477997.1;WP_153701022.1;WP_229284788.1;WP_229283832.1;WP_153702585.1;OPG88759.1;OYT04389.1;OTA7134…	OTA43063.1 peptidase P60 [Limosilactobacillus reuteri];UAW60878.1 LysM peptidoglycan-binding domain-containing protein [Limosilactobacillus reuteri];WP_142499345.1 C40 family peptidase [Limosilactobacillus reuteri];QPB65967.1 LysM peptidoglycan-binding dom	250	5	5	1	17.6	48.692	5852400	2193200	4022800	1430200	1313300	1371750	2.9326	0.00737444
AEI57064.1	AEI57064.1;WP_229398011.1;UIN25576.1;UIT53653.1;WP_013923871.1;WP_229308908.1;WP_152701273.1;EEI64641.1;OYS99979.1;OYS45933.1;OCW67209.1;OCW69955.1;OCW71003.1;OCX49338.1;OJI10772.1;OON64923.1;OPG87854.1;OTA44492.1;OTA46743.1;OTA50716.1;OTA52324.1;OTA53749.1;OTA58091.1;OTA64399.1;OTA69709.1;OTA74199.1;OTA77159.1;OTA79684.1;OTA81300.1;OTA84378.1;OCW64007.1;OTA86286.1;OAV47607.1;KEQ20016.1;OYT09392.…	AEI57064.1 lipoyltransferase and lipoate-protein ligase [Limosilactobacillus reuteri SD2112];WP_229398011.1 lipoate--protein ligase [Limosilactobacillus reuteri];UIN25576.1 lipoate--protein ligase [Limosilactobacillus reuteri];UIT53653.1 lipoate--protein l	199	18	18	5	57.9	38.488	21545000	23388000	22466500	8278500	7389900	7834200	2.86775	0.00591285
ABD13941.1	ABD13941.1;QLQ62553.1;PTM29382.1;OTA61775.1;CUR43916.1;CUU11842.1;EEI64722.1;OJI10716.1;OTA44309.1;OTA44841.1;OTA51402.1;OTA51629.1;OTA68120.1;OTA73686.1;OTA74459.1;OTA80109.1;OTA80714.1;OTA84231.1;OTA86844.1;OUN49444.1;OUP89366.1;QLL76864.1;PTM27329.1;CCC03592.1;AEI57129.1;AMY14327.1;UIN25519.1;UIT53711.1;VTZ88153.1;WP_003669915.1;WP_003675166.1;WP_098046122.1;CUR41960.1;CUR39223.1;WP_229271435.…	ABD13941.1 putative ethanolamine utilization protein [Limosilactobacillus reuteri];QLQ62553.1 BMC domain-containing protein [Limosilactobacillus reuteri];PTM29382.1 BMC domain-containing protein [Limosilactobacillus reuteri];OTA61775.1 propanediol utilizat	93	8	8	8	92.2	12.423	3483200	3693900	3588550	1146800	1396100	1271450	2.82241	0.0098274
CCC04476.1	CCC04476.1;OUL52049.1;CUU13436.1;WP_229270857.1;WP_087214413.1;OPG87073.1;OTA43385.1;WP_019253587.1;OTA46085.1;WP_003676400.1;QLQ62051.1;OUN50453.1;WP_087356068.1;OUP90863.1;WP_229280886.1;WP_216271698.1;QWS05353.1;WP_169482358.1;WP_109897522.1;PWT40121.1;WP_260241189.1;WP_109883825.1;PWT66726.1;PWT66144.1;PWT38943.1;PWT37924.1;KEK16174.1;PWT35270.1;PWT58347.1;PWT59981.1;WP_135350304.1;PWT55712.1…	CCC04476.1 conserved hypothetical protein [Limosilactobacillus reuteri subsp. suis];OUL52049.1 cellulose-binding protein (plasmid) [Limosilactobacillus reuteri];CUU13436.1 hypothetical phage protein (plasmid) [Limosilactobacillus reuteri subsp. suis];WP_22	42	10	10	10	41.6	39.975	3545000	1611500	2578250	853750	986260	920005	2.80243	0.010355
WP_174891815.1	WP_174891815.1;QKT14901.1	WP_174891815.1 KxYKxGKxW signal peptide domain-containing protein [Limosilactobacillus reuteri];QKT14901.1 KxYKxGKxW signal peptide domain-containing protein [Limosilactobacillus reuteri]	2	21	1	0	50.4	71.033	2391400	704350	1547875	630470	506180	568325	2.72357	0.0127381
AMY13926.1	AMY13926.1;OTA79710.1;ARE60377.1;AXX74141.1;CCC03176.1;CUR37971.1;CUR43454.1;CUU13274.1;EDX43548.1;KEK14242.1;KEK16261.1;OJI10319.1;OTA77234.1;OTA46649.1;OTA49034.1;OTA49394.1;OTA56935.1;OTA65518.1;OTA68143.1;OTA71437.1;OTA71907.1;WP_003665559.1;WP_086120508.1;WP_229282495.1;WP_124216351.1;KGE72497.1;WP_085649617.1;OTA75692.1;RMX24974.1;OXE59871.1;OYS54848.1;OYS48929.1;PTV03536.1;PWT48031.1;PWT52…	AMY13926.1 nucleoside-diphosphate kinase [Limosilactobacillus reuteri];OTA79710.1 nucleoside-diphosphate kinase [Limosilactobacillus reuteri];ARE60377.1 nucleoside-diphosphate kinase [Limosilactobacillus reuteri];AXX74141.1 nucleoside-diphosphate kinase [L	96	12	12	1	54.4	16.772	11559000	12497000	12028000	4902400	4119000	4510700	2.66655	0.0103733
OTA45072.1	OTA45072.1;CUU11784.1;OTA71730.1;UCN17718.1;RNF36626.1;QKT14592.1;QDK47810.1;OTA84469.1;OTA79484.1;OTA79015.1;CCC03644.1;OTA68291.1;OTA62577.1;OTA59044.1;OTA51230.1;OTA45368.1;CUR42830.1;OTA72870.1;AMY14271.1;WP_003675240.1;WP_229276702.1;UCN19483.1;UZM90436.1;OTA73710.1;AGN98468.1;OPG87786.1;UUW68352.1;WP_219285347.1;OJI10661.1;CUR37321.1;OTA50214.1;VTZ88206.1;WP_229268120.1;WP_072575273.1;OTA45…	OTA45072.1 glyoxal reductase [Limosilactobacillus reuteri];CUU11784.1 aldo-keto reductase family protein [Limosilactobacillus reuteri subsp. suis];OTA71730.1 glyoxal reductase [Limosilactobacillus reuteri];UCN17718.1 aldo/keto reductase [Limosilactobacillu	191	11	11	3	51.8	32.292	2254600	2393400	2324000	891910	880450	886180	2.62249	0.0166369
AMY14307.1	AMY14307.1;OTA73666.1;OJI10696.1;OTA44329.1;OTA44821.1;OTA51649.1;OTA61795.1;OTA68945.1;OTA74439.1;CUR43896.1;OTA80129.1;OTA80694.1;OTA84211.1;OTA86864.1;VTZ88173.1;WP_003675189.1;CUU11822.1;CCC03612.1;PWT65678.1;TGB11959.1;TSB18122.1;UAW62360.1;UCN17752.1;UCN19518.1;UIN25499.1;WP_229304777.1;WP_229281506.1;WP_229280739.1;WP_229274201.1;WP_229269126.1;WP_229268211.1;WP_217324439.1;WP_174891780.1;…	AMY14307.1 aquaporin [Limosilactobacillus reuteri];OTA73666.1 aquaporin [Limosilactobacillus reuteri];OJI10696.1 aquaporin [Limosilactobacillus reuteri];OTA44329.1 aquaporin [Limosilactobacillus reuteri];OTA44821.1 aquaporin [Limosilactobacillus reuteri];O	101	2	2	2	11.9	25.142	14895000	13673000	14284000	6058800	4902800	5480800	2.60619	0.0122971
CCC04490.1	CCC04490.1;PWT40108.1;WP_169477387.1;WP_003676428.1;QWS05250.1;QLQ62039.1;WP_035168493.1;PWT66156.1;CUU13422.1;PWT37935.1;OTA46097.1;PWT34081.1;PWT35281.1;OUN50464.1;KEK16161.1;PWT45513.1;PWT58336.1;PWT66714.1;PWT59992.1;PWT55723.1;WP_109954737.1;UUW69634.1;WP_219285467.1;PWT67823.1;WP_169470790.1;PWT38417.1;WP_079376364.1;OUL52062.1;OPG87059.1;OUP90849.1;WP_135350293.1;TGB09670.1;WP_019253575.1;…	CCC04490.1 putative DNA binding HU [Limosilactobacillus reuteri subsp. suis];PWT40108.1 HU family DNA-binding protein [Limosilactobacillus reuteri];WP_169477387.1 HU family DNA-binding protein [Limosilactobacillus reuteri];WP_003676428.1 MULTISPECIES: HU f	38	5	5	5	52.3	9.9195	4029300	1414600	2721950	1268300	878260	1073280	2.5361	0.0209282
WP_217324524.1	WP_217324524.1;OJI11299.1;CUR36590.1;OTA51422.1;OTA62521.1;AMY14703.1;OTA74775.1;OTA60212.1;OTA79941.1;OTA82433.1;OTA83277.1;OTA83518.1;AGN98862.1;OTA44115.1;PWT57398.1;WP_139561555.1;PWT43786.1;PWT32140.1;PWT34368.1;PWT40643.1;OTA77425.1;QDK48198.1;RNF36952.1;QKT14926.1;WP_229268741.1;QWS04780.1;WP_109897410.1;PWT37278.1;KGE70172.1;CUR41981.1;OPG88200.1;AEI56543.1;OTA45235.1;UAW61965.1;WP_229394…	WP_217324524.1 LysM domain-containing protein [Limosilactobacillus reuteri];OJI11299.1 peptidoglycan-binding protein LysM [Limosilactobacillus reuteri];CUR36590.1 Aggregation promoting factor [Limosilactobacillus reuteri];OTA51422.1 peptidoglycan-binding p	160	6	1	0	30.5	27.91	1799500	713160	1256330	575580	417470	496525	2.53025	0.0212572
WP_003674499.1	WP_003674499.1;UCN19179.1;UCN17412.1;OTA87506.1;OTA85676.1;OTA83710.1;OTA76510.1;OTA71153.1;OTA70969.1;OTA65012.1;OTA53656.1;OTA49116.1;OTA48515.1;OTA44766.1;OTA44697.1;CUU13315.1;CUR43281.1;CUR37861.1;CCC03135.1;AMY13964.1;AGO00007.1	WP_003674499.1 cytochrome b5 domain-containing protein [Limosilactobacillus reuteri];UCN19179.1 cytochrome B5 [Limosilactobacillus reuteri];UCN17412.1 cytochrome B5 [Limosilactobacillus reuteri];OTA87506.1 cytochrome B5 [Limosilactobacillus reuteri];OTA856	21	4	4	2	76.6	8.5584	4277000	5228300	4752650	1867800	1934100	1900950	2.50014	0.023033
CUR36491.1	CUR36491.1;OTA77626.1;UCN20096.1;UCN18331.1;RNF37174.1;QDK48501.1;OTA84602.1;OTA82819.1;WP_003673979.1;OTA61303.1;OTA43124.1;OTA58716.1;OTA49139.1;OTA73650.1;CCC02757.1;OTA43449.1;CUR43188.1;CUU12488.1;VTZ94036.1;OPG88458.1;AGN99149.1;WP_229287526.1;OCW68467.1;TGY42977.1;QDR72412.1;WP_019253220.1;OUL54167.1;OCX47041.1;OCW68695.1;OCW62031.1;WP_152712237.1;OCW61906.1;WP_063164047.1;OCW61773.1;KGE71…	CUR36491.1 FIG00746897: hypothetical protein [Limosilactobacillus reuteri];OTA77626.1 hypothetical protein BHL80_07000 [Limosilactobacillus reuteri];UCN20096.1 hypothetical protein LEP61_04635 [Limosilactobacillus reuteri];UCN18331.1 hypothetical protein L	108	4	4	4	55.4	11.186	1194600	1127800	1161200	375440	555520	465480	2.49463	0.0233744
CCC03430.1	CCC03430.1;WP_086120402.1;CUR42806.1;OTA67533.1;RNF36774.1;QKT14737.1;QDK47953.1;OTA86220.1;OTA84057.1;OTA82675.1;OTA75949.1;OTA75337.1;OTA71043.1;OTA58281.1;OTA58149.1;OTA48621.1;OTA48180.1;OTA47778.1;OTA45675.1;OTA43709.1;OJI10885.1;CUU12020.1;CUR36954.1;UCN17868.1;WP_086142547.1;UZM90606.1;WP_003674943.1;WP_302499797.1;WP_229308009.1;OTA73324.1;UCN19634.1;OYS57394.1;WP_094509753.1;KEK15924.1;W…	CCC03430.1 alcohol dehydrogenase [Limosilactobacillus reuteri subsp. suis];WP_086120402.1 zinc-dependent alcohol dehydrogenase family protein [Limosilactobacillus reuteri];CUR42806.1 Alcohol dehydrogenase [Limosilactobacillus reuteri];OTA67533.1 alcohol de	204	8	8	8	26.4	37.868	1367200	1315500	1341350	536170	543300	539735	2.4852	0.02397
AGN98859.1	AGN98859.1;OTA77428.1;OTA82435.1;OTA83280.1;OTA83521.1;PWT32137.1;PWT34371.1;PWT40646.1;PWT43783.1;OTA62925.1;PWT57920.1;WP_229305176.1;WP_229283733.1;WP_229279221.1;WP_153703599.1;PWT57401.1;WP_109884813.1;WP_016496668.1;WP_003675863.1;OTA79944.1;OTA74772.1;UCN18072.1;OTA74150.1;PWT62830.1;PWT52731.1;CCC04044.1;CUR36593.1;CUR41989.1;CUU12226.1;OJI11296.1;OPG88203.1;OTA44117.1;OTA45238.1;OTA46338…	AGN98859.1 anaerobic ribonucleoside-triphosphate reductase [Limosilactobacillus reuteri I5007];OTA77428.1 anaerobic ribonucleoside-triphosphate reductase [Limosilactobacillus reuteri];OTA82435.1 anaerobic ribonucleoside-triphosphate reductase [Limosilactob	246	25	25	25	36.4	85.177	6583100	5343000	5963050	2571800	2499900	2535850	2.3515	0.0253727
WP_003675093.1	WP_003675093.1;CUU11897.1;CCC03539.1;OTA79679.1;OTA86291.1;AGN98518.1;OTA44487.1;OPG87859.1;QDK47852.1;OTA50711.1;OJI10766.1;CUR43968.1;CUR37945.1;QKT14637.1;UZM90481.1;VTZ89837.1;OTA64404.1;WP_174891783.1;OTA77154.1;OTA58086.1;WP_228341577.1;QWS03961.1;OTA84383.1;WP_063164367.1;OTA46738.1;UNL36669.1;UNL41027.1;UXE89045.1;WP_216271089.1;OTA81295.1;WP_217324444.1;AMY14377.1;OTA52319.1;OTA53744.1;O…	WP_003675093.1 alpha/beta fold hydrolase [Limosilactobacillus reuteri];CUU11897.1 conserved hypothetical protein [Limosilactobacillus reuteri subsp. suis];CCC03539.1 conserved hypothetical protein [Limosilactobacillus reuteri subsp. suis];OTA79679.1 alpha/	177	12	12	1	73.4	27.524	3142000	3283700	3212850	1385000	1350100	1367550	2.34935	0.0344848
AGN99879.1	AGN99879.1;OTA49098.1;CCC03244.1;OTA65723.1;CUR36448.1;CUR43009.1;CUU13205.1;OJI10251.1;OPG87010.1;OTA47186.1;OTA47422.1;OTA47956.1;OTA53363.1;UCN17300.1;OTA69941.1;UZM90016.1;OTA74019.1;OTA74849.1;OTA75646.1;OTA89545.1;OTA90646.1;QDK49250.1;QKT15960.1;RNF37826.1;WP_003674676.1;UCN19068.1;WP_225358215.1;AMY13851.1;WP_086143220.1;OTA63454.1;WP_229304625.1;OYS51616.1;WP_257525562.1;WP_260234901.1;O…	AGN99879.1 Arylsulfotransferase (ASST) [Limosilactobacillus reuteri I5007];OTA49098.1 hypothetical protein BHL90_01725 [Limosilactobacillus reuteri];CCC03244.1 conserved hypothetical protein [Limosilactobacillus reuteri subsp. suis];OTA65723.1 hypothetical	108	19	19	19	60	52.863	5354400	5566600	5460500	2391400	2299200	2345300	2.32827	0.027117
OTA73812.1	OTA73812.1;OPG89425.1;OTA43838.1;OTA49932.1;OTA53120.1;OTA64416.1;OTA67000.1;OTA81662.1;CUU13405.1;OTA74874.1;OTA67638.1;OTA76068.1;OTA76168.1;OTA80889.1;OJI10443.1;CUR42096.1;RNF36506.1;UCN19252.1;OTA88834.1;QDK49431.1;CCC04121.1;UZM90206.1;VTZ88081.1;CUR36379.1;UCN17485.1;WP_004562471.1;OTA43144.1;AGO00087.1;WP_229283088.1;QKT16152.1;WP_174892013.1;WP_086142341.1;WP_016497194.1;AMY14037.1;OTA52…	OTA73812.1 amidohydrolase [Limosilactobacillus reuteri];OPG89425.1 amidohydrolase [Limosilactobacillus reuteri];OTA43838.1 amidohydrolase [Limosilactobacillus reuteri];OTA49932.1 amidohydrolase [Limosilactobacillus reuteri];OTA53120.1 amidohydrolase [Limos	156	26	26	26	68.8	57.699	6378600	6843800	6611200	2528700	3176300	2852500	2.31769	0.0279519
WP_086131847.1	WP_086131847.1;OTA89858.1	WP_086131847.1 type I glyceraldehyde-3-phosphate dehydrogenase, partial [Limosilactobacillus reuteri];OTA89858.1 type I glyceraldehyde-3-phosphate dehydrogenase, partial [Limosilactobacillus reuteri]	2	2	1	1	7.7	30.617	3678600	3427700	3553150	38604	3039100	1538852	2.30896	0.0384364
WP_229271389.1	WP_229271389.1	WP_229271389.1 lipoate--protein ligase [Limosilactobacillus reuteri]	1	15	2	2	45.7	38.511	2676700	2985700	2831200	1216500	1240300	1228400	2.30479	0.0388702
WP_229272485.1	WP_229272485.1	WP_229272485.1 cysteine synthase family protein [Limosilactobacillus reuteri]	1	10	1	1	47.4	32.584	795700	919370	857535	401960	365640	383800	2.23433	0.0469844
AGN98359.1	AGN98359.1;OPG87678.1;UCN17624.1;UCN19390.1;VTZ90984.1;QDK47721.1;WP_003675399.1;CUR37880.1;CCC03736.1;AMY14179.1;CUR42437.1;CUU11683.1;OJI10566.1;OTA45247.1;UZM90345.1;OTA82463.1;OTA45345.1;OTA51363.1;OTA57586.1;OTA61676.1;OTA68877.1;OTA72334.1;OTA73127.1;OTA77471.1;OTA78749.1;OTA50821.1;RNF36542.1;OTA78865.1;OTA87319.1;WP_174891766.1;QKT14498.1;WP_191996550.1;WP_035152157.1;KEQ20970.1;WLR78793.…	AGN98359.1 aminopeptidase C [Limosilactobacillus reuteri I5007];OPG87678.1 aminopeptidase [Limosilactobacillus reuteri];UCN17624.1 C1 family peptidase [Limosilactobacillus reuteri];UCN19390.1 C1 family peptidase [Limosilactobacillus reuteri];VTZ90984.1 Ami	205	30	30	4	75.9	51.016	20854000	24549000	22701500	10680000	10440000	10560000	2.14976	0.0452758
WP_163622411.1	WP_163622411.1;OTA50141.1;OTA87250.1;OTA83938.1;OTA78101.1;OTA76531.1;OTA74908.1;OTA71214.1;OTA70985.1;OTA60467.1;OTA53792.1;OTA48535.1;OTA46486.1;OTA43095.1;OPG89415.1;CUU11575.1;CUR43756.1;CUR36858.1;QKT14411.1;UZM90249.1;VTZ87950.1;WP_019251835.1;WP_153704794.1;OTA90216.1;QDK47630.1;AMY14083.1;OYS96372.1;OYS87212.1;WP_035156678.1;KGE71095.1;OYS54916.1;OYS57079.1;OYS61387.1;OYS77068.1;OYS62391.…	WP_163622411.1 VOC family protein [Limosilactobacillus reuteri];OTA50141.1 sulfurtransferase [Limosilactobacillus reuteri];OTA87250.1 sulfurtransferase [Limosilactobacillus reuteri];OTA83938.1 sulfurtransferase [Limosilactobacillus reuteri];OTA78101.1 sulf	187	12	12	6	55.8	29.416	7562200	8102700	7832450	3889700	3457500	3673600	2.13209	0.0476378
UCN17997.1	UCN17997.1;OTA69862.1;AGN98779.1;OTA76446.1;CCC03316.1;CUR42744.1;CUU12146.1;OJI11016.1;OTA42644.1;OTA51393.1;OTA51741.1;OTA53231.1;OTA60522.1;OTA76312.1;OTA74044.1;OTA78007.1;OTA81225.1;WP_302499808.1;WP_079376145.1;OPG88092.1;WP_081120425.1;QDK48068.1;QKT14850.1;RNF36879.1;UCN19764.1;UZM90773.1;AMY14620.1;OTA83810.1;OTA42461.1;VTZ93484.1;OTA42922.1;WP_142490474.1;WP_117115006.1;OTA82254.1;WP_08…	UCN17997.1 NAD(P)/FAD-dependent oxidoreductase [Limosilactobacillus reuteri];OTA69862.1 pyridine nucleotide-disulfide oxidoreductase [Limosilactobacillus reuteri];AGN98779.1 FAD-dependent pyridine nucleotide-disulfide oxidoreductase [Limosilactobacillus re	234	21	21	11	57.8	48.971	9079600	10972000	10025800	4723000	4696800	4709900	2.12867	0.0481098
CCC03441.1	CCC03441.1;CUU12007.1;WP_086143317.1;WP_003674958.1;VTZ89001.1;UCN19623.1;UCN17857.1;QKT14727.1;QDK47944.1;OTA57808.1;CUR43377.1;OTA59903.1;WP_229304426.1;WP_086141714.1;OTA76418.1;WP_086132594.1;OTA73180.1;WP_086131631.1;WP_063164379.1;CUR37380.1;AMY14474.1;WP_216578378.1;RNF36763.1;WP_229281179.1;WP_117115106.1;OTA48707.1;WP_086141400.1;WP_229268159.1;WP_152718242.1;OCW69483.1;WP_152699916.1;WP…	CCC03441.1 putative Xaa-His dipeptidase [Limosilactobacillus reuteri subsp. suis];CUU12007.1 putative dipeptidase [Limosilactobacillus reuteri subsp. suis];WP_086143317.1 dipeptidase [Limosilactobacillus reuteri];WP_003674958.1 dipeptidase [Limosilactobaci	250	19	19	8	62.8	49.228	6175400	7474800	6825100	3163200	3265000	3214100	2.12349	0.0488322
WP_029507820.1	WP_029507820.1;WP_306036980.1;WLR78993.1	WP_029507820.1 glutamine-hydrolyzing GMP synthase [Limosilactobacillus reuteri];WP_306036980.1 glutamine-hydrolyzing GMP synthase [Limosilactobacillus reuteri];WLR78993.1 glutamine-hydrolyzing GMP synthase [Limosilactobacillus reuteri]	3	36	1	1	69.4	57.715	484220	473680	478950	428170	1542200	985185	0.486152	0.0468341
WP_229273621.1	WP_229273621.1;EGC14178.1;WP_229407269.1;UCN19825.1;UCN18058.1;WLR79277.1;WP_003664355.1;WP_011953520.1;UAW59695.1;WP_216578381.1;WP_229268046.1;UFK67634.1;WP_013923804.1;TGY57954.1;WP_152701333.1;WP_123072484.1;WP_102816636.1;WP_098046972.1;WP_094504473.1;UFK64888.1;UGQ32140.1;WP_019251428.1;WJK31727.1;OCW67011.1;OYT05725.1;OYS50151.1;UUW67935.1;PTM28103.1;TSB18732.1;WLC95240.1;VTZ92481.1;UHC307…	WP_229273621.1 GntR family transcriptional regulator [Limosilactobacillus reuteri];EGC14178.1 transcriptional regulator, GntR family [Limosilactobacillus reuteri MM4-1A];WP_229407269.1 GntR family transcriptional regulator [Limosilactobacillus reuteri];UCN	170	5	5	5	28.3	14.322	540710	537600	539155	1239600	982040	1110820	0.485367	0.046359
CCC02768.1	CCC02768.1;WP_003673995.1;CUU12501.1;OTA85926.1;OTA73020.1;KEQ21481.1;PWT32282.1;KRK45915.1;OJI11735.1;OPG88448.1;OTA45316.1;OTA45801.1;OTA46995.1;OTA51672.1;OTA57789.1;OTA72255.1;OJI11572.1;EEI08656.1;PWT34516.1;OYS74703.1;PWT41082.1;PWT65179.1;PWT68754.1;QBE45655.1;QDK48512.1;QKT15314.1;UNL39785.1;TGY61622.1;QPB66287.1;RMX26994.1;EGC14997.1;CUR37781.1;EDX42292.1;OYS78498.1;WP_260234844.1;WP_094…	CCC02768.1 conserved hypothetical protein [Limosilactobacillus reuteri subsp. suis];WP_003673995.1 hypothetical protein [Limosilactobacillus reuteri];CUU12501.1 conserved hypothetical protein [Limosilactobacillus reuteri subsp. suis];OTA85926.1 polyprenyl	199	7	7	7	31.2	33.874	385370	333100	359235	851840	640310	746075	0.4815	0.0440691
ACC62487.1	ACC62487.1;WP_003663648.1;WJK31296.1;OYS53232.1;WP_136001170.1;WP_153700956.1;WP_153702919.1;WP_153701717.1;WP_306037712.1;WP_152699906.1;WP_260245721.1;WP_260234852.1;WP_229284524.1;WP_229283395.1;WP_229273758.1;WP_219284944.1;WP_169471596.1;VTZ94067.1;UUW67512.1;WLR79712.1;WP_003667738.1;OCW68147.1;WP_003671861.1;PTS26670.1;OYS54544.1;PWT30594.1;WP_085650000.1;WP_079376059.1;WP_063164066.1;WP_1…	ACC62487.1 nitrate reductase gamma subunit [Limosilactobacillus reuteri];WP_003663648.1 respiratory nitrate reductase subunit gamma [Limosilactobacillus reuteri];WJK31296.1 respiratory nitrate reductase subunit gamma [Limosilactobacillus reuteri];OYS53232.	172	4	4	4	16.2	26.653	852040	834280	843160	1854900	1743600	1799250	0.468617	0.0370032
OYS78623.1	OYS78623.1;OYS90541.1;AGN99465.1;OON61786.1;ANU51115.1;AXX73665.1;CCC03043.1;CUR36799.1;CUR39911.1;CUR41237.1;CUR43347.1;CUU12790.1;EEI65086.1;OXE59411.1;OYS92358.1;AMY13446.1;OPG88783.1;OTA43250.1;OTA44965.1;OTA48915.1;OTA49498.1;OTA55350.1;OTA60961.1;OTA75772.1;OYS68893.1;OYS67596.1;OTA86097.1;OTA89437.1;QLL75745.1;WP_229268532.1;OYS44492.1;OYS47355.1;OYS49570.1;OYS51863.1;OYS52853.1;OYS55377.1…	OYS78623.1 hypothetical protein CBG05_06075 [Limosilactobacillus reuteri];OYS90541.1 hypothetical protein CBG06_02915 [Limosilactobacillus reuteri];AGN99465.1 TPR repeat-containing protein [Limosilactobacillus reuteri I5007];OON61786.1 hypothetical protein	207	14	14	14	49.2	35.054	1779700	1817200	1798450	4146000	3554200	3850100	0.467118	0.0362356
AGN99707.1	AGN99707.1;CUU13036.1;OTA76254.1;OTA75173.1;OTA68901.1;OTA64452.1;OTA60630.1;OTA59412.1;OTA48741.1;OTA47856.1;OTA47588.1;OTA45768.1;OTA43623.1;OPG89014.1;OJI10103.1;CUR42920.1;OTA82026.1;CUR36296.1;CCC04350.1;AMY13704.1;OTA82107.1;QDK49094.1;WP_086120143.1;WP_003676219.1;VTZ88599.1;UZM89867.1;UCN18906.1;UCN17136.1;RNF37673.1;QKT15810.1;OTA78523.1;OTA79160.1;WP_086135979.1;OTA84257.1;OYS85612.1;PW…	AGN99707.1 two-component system response regulator [Limosilactobacillus reuteri I5007];CUU13036.1 two-component system response regulator [Limosilactobacillus reuteri subsp. suis];OTA76254.1 DNA-binding response regulator [Limosilactobacillus reuteri];OTA7	183	13	13	13	63.6	27.798	1713200	2019000	1866100	3826600	4173600	4000100	0.466513	0.0359294
AGN99741.1	AGN99741.1;OTA79144.1;CCC04366.1;CUR36280.1;CUR42904.1;CUU13052.1;EDX41945.1;OJI10120.1;OPG88998.1;OTA43639.1;OTA47516.1;OTA47604.1;OTA82091.1;OTA48757.1;OTA59396.1;OTA60614.1;OTA62121.1;OTA68917.1;OTA75157.1;OTA76238.1;OTA78507.1;OTA82042.1;AMY13720.1;OYS65970.1;OYS90910.1;OYS67789.1;OYS48177.1;OYS50092.1;OYS50377.1;OYS53343.1;OYS56324.1;OYS56544.1;OYS56639.1;OYS60909.1;OYS61901.1;OYS86898.1;OTA…	AGN99741.1 GCN5-related N-acetyltransferase [Limosilactobacillus reuteri I5007];OTA79144.1 GNAT family N-acetyltransferase [Limosilactobacillus reuteri];CCC04366.1 putative acetyltransferase [Limosilactobacillus reuteri subsp. suis];CUR36280.1 Acetyltransf	193	4	4	4	33.7	19.111	630570	610010	620290	1065200	1597700	1331450	0.465876	0.0356083
OTA46291.1	OTA46291.1;RMX27441.1;OTA89406.1;WP_003674303.1;OTA51252.1;OTA49294.1;TGB11758.1;VTZ93702.1;PWT49796.1;RNF37386.1;OPG88701.1;AMY13339.1;AXX73612.1;CCC02993.1;CUU12736.1;AGR64128.1;OJI09797.1;PWT61501.1;PWT45882.1;OUL54502.1;OTA81670.1;OTA59327.1;OTA64935.1;OTA72987.1;OTA73801.1;OTA78741.1;OTA79280.1;OTA79506.1;OTA42441.1;OTA82330.1;CUR36748.1;CUR38921.1;WP_020843066.1;WJK32133.1;UZM89589.1;CUR409…	OTA46291.1 hypothetical protein BHL89_06190 [Limosilactobacillus reuteri];RMX27441.1 hypothetical protein C6H63_05565 [Limosilactobacillus reuteri];OTA89406.1 hypothetical protein BHL84_03785 [Limosilactobacillus reuteri];WP_003674303.1 hypothetical protei	163	8	8	8	59.8	13.888	639010	189600	414305	918910	865180	892045	0.464444	0.0348948
AGN99373.1	AGN99373.1;OTA49701.1;VTZ89059.1;WP_003674266.1;UCN18602.1;RNF37361.1;CCC02968.1;CUR37463.1;CUR43678.1;CUU12707.1;OJI09771.1;OPG88654.1;OTA42590.1;OTA43795.1;OTA47685.1;OTA48572.1;UCN16831.1;AMY13314.1;OTA79877.1;OTA57008.1;OTA55013.1;OTA88504.1;OTA88207.1;OTA86405.1;QDK48803.1;OTA77678.1;OTA72149.1;OTA57103.1;OTA71198.1;QKT15520.1;OTA71799.1;WP_265486251.1;WP_229268691.1;UZM89566.1;OYS49361.1;OY…	AGN99373.1 amino acid aminotransferase [Limosilactobacillus reuteri I5007];OTA49701.1 amino acid aminotransferase [Limosilactobacillus reuteri];VTZ89059.1 Putative N-acetyl-LL-diaminopimelate aminotransferase [Limosilactobacillus reuteri];WP_003674266.1 am	56	18	18	1	53	43.078	16707000	15845000	16276000	37800000	32331000	35065500	0.46416	0.013625
AGN99049.1	AGN99049.1;OTA48894.1;AMY14968.1;AXX73313.1;CCC03862.1;CUR36721.1;CUU12412.1;OCW63498.1;OCW67314.1;OCW68961.1;OTA56955.1;OCW70586.1;OJI11489.1;OPG88358.1;OTA42386.1;OTA42832.1;OTA44380.1;OTA50575.1;OCW65890.1;OTA86693.1;OYS69514.1;OTA89795.1;OTA66840.1;OTA69744.1;OTA72842.1;OTA74943.1;OTA76770.1;OTA80317.1;OTA85062.1;OYS65916.1;OTA63543.1;OYS48643.1;OYS50938.1;OYS54265.1;OYS56046.1;OYS57202.1;OYS…	AGN99049.1 alkyl hydroperoxide reductase [Limosilactobacillus reuteri I5007];OTA48894.1 peroxiredoxin [Limosilactobacillus reuteri];AMY14968.1 peroxiredoxin [Limosilactobacillus reuteri];AXX73313.1 peroxiredoxin [Limosilactobacillus reuteri];CCC03862.1 alk	161	22	22	2	74.3	21.041	57527000	65245000	61386000	137350000	127200000	132275000	0.464079	0.0136035
EEI65211.1	EEI65211.1;UFK67587.1;UPG78673.1;UNL40181.1;UNL37517.1;UIT54546.1;UIN26632.1;UHC31897.1;UGQ33298.1;UXE89941.1;OYT08981.1;UFK66139.1;UYQ75635.1;WP_152726864.1;PWT61084.1;PWT33421.1;UUW69138.1;UZM89690.1;PWT55306.1;OTA71555.1;OCX48917.1;OCW69419.1;OCW68448.1;OCW65532.1;OCW64417.1;OCW62914.1;OTA65572.1;VTZ92978.1;PWT69748.1;PWT65544.1;WP_003666775.1;WLR80107.1;WLC96440.1;WJK30905.1;PWT60638.1;PWT449…	EEI65211.1 cold-shock DNA-binding domain protein [Limosilactobacillus reuteri CF48-3A];UFK67587.1 Cold shock protein CspB [Limosilactobacillus reuteri];UPG78673.1 cold shock domain-containing protein [Limosilactobacillus reuteri];UNL40181.1 cold shock doma	163	3	3	3	51.9	9.3188	438060	398550	418305	674210	1162000	918105	0.455618	0.0307165
OJI10586.1	OJI10586.1;WP_072575257.1;UCN19410.1;CCC03712.1;WP_086131508.1;WP_252413617.1;WP_229282835.1;WP_086141706.1;WP_086118503.1;UZM90365.1;UCN17645.1;WP_003675361.1;VTZ89135.1;RNF36562.1;QDK47741.1;AGN98387.1;WP_225358059.1;OTA87964.1;OTA76802.1;OTA63914.1;OTA59055.1;OTA43177.1;OPG87701.1;CUU11709.1;CUR43553.1;CUR37733.1;AMY14197.1;OTA51160.1;OTA73847.1;WP_086132563.1;WP_174891770.1;OTA71669.1;WP_0861…	OJI10586.1 ABC transporter permease [Limosilactobacillus reuteri];WP_072575257.1 ABC transporter permease [Limosilactobacillus reuteri];UCN19410.1 ABC transporter permease [Limosilactobacillus reuteri];CCC03712.1 peptide ABC transporter permease component	221	7	7	7	29.5	38.964	514580	540250	527415	1178000	1140000	1159000	0.45506	0.0304652
OTA71240.1	OTA71240.1;CUU12928.1;QKT15726.1;ANU50985.1;AXX73807.1;CCC04247.1;CUR38004.1;CUR38478.1;CUR42015.1;CUR42960.1;QDR72991.1;QQR15079.1;RMX25142.1;KEK13713.1;KEQ19843.1;OCW62173.1;OCW64502.1;OCW66809.1;OCW67681.1;OCW69494.1;EDX42065.1;AMY13584.1;AGR63945.1;OJI09987.1;OTA50422.1;OCX49804.1;WP_035155832.1;OTA46448.1;OTA51838.1;OTA54543.1;OTA60136.1;OTA61762.1;OTA71587.1;OTA75048.1;OTA76944.1;OTA78552.1…	OTA71240.1 amino acid ABC transporter substrate-binding protein [Limosilactobacillus reuteri];CUU12928.1 amino acid ABC transporter amino acid binding protein [Limosilactobacillus reuteri subsp. suis];QKT15726.1 amino acid ABC transporter substrate-binding	186	10	10	10	51.6	32.407	1315700	1414300	1365000	3082100	2949600	3015850	0.452609	0.0293769
OTA82095.1	OTA82095.1;WP_035151757.1;CUR36284.1;CUR42908.1;CUU13048.1;KEK14745.1;KEK15187.1;KEQ21233.1;OCW65063.1;OCW66688.1;OCW67801.1;OCW70293.1;OCX49670.1;OJI10115.1;OPG89002.1;OTA43635.1;OTA45886.1;OTA47512.1;OTA47600.1;OTA48753.1;OTA59400.1;OTA62117.1;OYS93215.1;OYS85624.1;OYS98053.1;CCC04362.1;AMY13716.1;OTA60618.1;OYS50919.1;OTA79148.1;OTA82038.1;AGR63856.1;OTA76242.1;OTA78511.1;WP_094511664.1;TGB127…	OTA82095.1 ribokinase [Limosilactobacillus reuteri];WP_035151757.1 ribokinase [Limosilactobacillus reuteri];CUR36284.1 Ribokinase [Limosilactobacillus reuteri];CUR42908.1 Ribokinase [Limosilactobacillus reuteri];CUU13048.1 ribokinase [Limosilactobacillus r	199	14	14	13	66.1	32.432	1537400	1877500	1707450	3029500	4726600	3878050	0.440286	0.0243236
VTZ94070.1	VTZ94070.1;OTA78314.1;KEK15408.1;OYS72092.1;KEQ21469.1;OTA50046.1;OTA63868.1;OTA75263.1;OTA87240.1;RMX26695.1;OUN48871.1;OUP89015.1;OYS59432.1;OYS76045.1;OJI11132.1;OYS89296.1;EDX42305.1;CUU12514.1;CUR44156.1;CUR37768.1;CCC02781.1;OYS64126.1;OYS74716.1;OYT03221.1;OYS60878.1;OYT06070.1;OYT06177.1;OYT08807.1;PTV03380.1;WP_094504408.1;WP_003663647.1;QKT15327.1;UZM89376.1;OYS78485.1;RNF37635.1;AGN991…	VTZ94070.1 Nitrate reductase molybdenum cofactor assembly chaperone NarJ [Limosilactobacillus reuteri];OTA78314.1 nitrate reductase molybdenum cofactor assembly chaperone [Limosilactobacillus reuteri];KEK15408.1 nitrate reductase [Limosilactobacillus reute	186	5	5	5	45.8	22.235	1235100	1620900	1428000	3725700	2854900	3290300	0.434003	0.0220042
WP_153703373.1	WP_153703373.1	WP_153703373.1 FAD-dependent oxidoreductase [Limosilactobacillus reuteri]	1	24	24	2	60.2	60.02	17750000	18552000	18151000	43086000	41098000	42092000	0.431222	0.00683791
WP_257496671.1	WP_257496671.1	WP_257496671.1 UDP-N-acetylmuramate dehydrogenase [Limosilactobacillus reuteri]	1	15	2	2	70.5	32.361	439290	726860	583075	950530	1757500	1354015	0.430627	0.0208265
AGN99735.1	AGN99735.1;OTA47598.1;CUU13046.1;EDX41951.1;OJI10113.1;OPG89004.1;OTA43633.1;OTA82036.1;OTA45884.1;CUR36286.1;OTA59402.1;OTA60620.1;OTA62115.1;OTA68911.1;OTA75163.1;OTA76244.1;OTA78513.1;OTA47510.1;CUR42910.1;CCC04360.1;RMX25351.1;OTA87711.1;QKT15820.1;RNF37683.1;TGB12744.1;UCN17163.1;UCN18933.1;UZM89877.1;VTZ88582.1;WP_003666461.1;WP_086131640.1;WP_063164241.1;OTA79150.1;AMY13714.1;WP_302500130.…	AGN99735.1 L-fucose transporter [Limosilactobacillus reuteri I5007];OTA47598.1 L-fucose:H+ symporter permease [Limosilactobacillus reuteri];CUU13046.1 L-fucose:H+ symporter permease [Limosilactobacillus reuteri subsp. suis];EDX41951.1 L-fucose transporter	192	10	10	3	21.5	50.468	985230	1001000	993115	2469900	2167700	2318800	0.428288	0.0200383
OTA75736.1	OTA75736.1;WP_229278788.1;CUU12829.1;OPG88747.1;OTA44157.1;OTA49019.1;OTA50565.1;OTA54611.1;OTA60925.1;OTA71255.1;OTA82904.1;CCC03079.1;OTA71611.1;WP_229274362.1;WP_063164178.1;OTA76975.1;RMX27610.1;RNF37471.1;TGB10743.1;AMY13482.1;WP_003674402.1;OTA78658.1;WP_122481142.1;WP_229267805.1;WP_229279981.1;WP_229283826.1;OJI09886.1;WP_285227396.1;OTA85809.1;WP_086142203.1;WP_229273381.1;WP_072575079.1…	OTA75736.1 diaminopimelate decarboxylase [Limosilactobacillus reuteri];WP_229278788.1 diaminopimelate decarboxylase [Limosilactobacillus reuteri];CUU12829.1 Diaminopimelate decarboxylase [Limosilactobacillus reuteri subsp. suis];OPG88747.1 diaminopimelate	222	16	16	5	56.2	47.756	1255600	1436900	1346250	3217900	3077900	3147900	0.427666	0.0198323
CCC03077.1	CCC03077.1;OTA44999.1;OTA81892.1;OTA82906.1;WP_172381011.1;WP_172385619.1;WP_183406458.1;OTA71613.1;OTA71257.1;OTA60927.1;OTA75738.1;OTA76977.1;CUR42186.1;OTA78660.1;UCN16948.1;OTA54613.1;OTA50563.1;CUR36834.1;OTA44159.1;OTA43540.1;OPG88749.1;OJI09884.1;CUU12827.1;OTA49021.1;OTA85807.1;OTA60483.1;WP_171945892.1;UCN18719.1;RNF37469.1;AGN99501.1;WP_003674398.1;VTZ89634.1;QDK48916.1;WP_229407539.1;W…	CCC03077.1 amino acid amidohydrolase [Limosilactobacillus reuteri subsp. suis];OTA44999.1 N-acetyldiaminopimelate deacetylase [Limosilactobacillus reuteri];OTA81892.1 N-acetyldiaminopimelate deacetylase [Limosilactobacillus reuteri];OTA82906.1 N-acetyldiam	221	8	8	8	26.5	42.375	376960	359740	368350	911180	819970	865575	0.425555	0.019145
WP_229268417.1	WP_229268417.1;KGE72344.1;ANU50984.1;AWD61980.1;AXX73808.1;CCC04248.1;CUR38005.1;CUR42961.1;CUU12929.1;EDX42064.1;KEK16776.1;OTA49009.1;KEQ19842.1;OCW62174.1;KEK13714.1;OCW64503.1;OCW66808.1;OCW67682.1;OCW69495.1;OJI09988.1;VTZ88379.1;WLR80195.1;WP_003676075.1;WP_134988715.1;WP_003666656.1;AGN99610.1;AMY13585.1;WJK30816.1;OTA50423.1;PTV05169.1;OTA71239.1;OTA61761.1;OTA75049.1;OTA60137.1;OTA76943.…	WP_229268417.1 amino acid ABC transporter ATP-binding protein [Limosilactobacillus reuteri];KGE72344.1 polar amino acid ABC transporter ATPase [Limosilactobacillus reuteri];ANU50984.1 polar amino acid ABC transporter ATP-binding protein [Limosilactobacillu	96	12	12	1	57.6	24.099	2486500	2275000	2380750	6292600	4914700	5603650	0.424857	0.00591158
AGN99346.1	AGN99346.1;OTA83350.1;AMY13287.1;ANU51215.1;AXX73549.1;CCC02941.1;CUR37436.1;CUR43705.1;CUU12680.1;OYS53515.1;EDX41682.1;OTA42563.1;KGE70015.1;OCW61538.1;OCW63129.1;OCW63288.1;OCW69013.1;OCW69706.1;OJI09742.1;AGR64179.1;OPG88681.1;OTA43768.1;OYT02044.1;OTA77652.1;OYT02472.1;WP_063164117.1;OTA51790.1;OTA54987.1;OTA56982.1;OTA71172.1;OTA71773.1;OTA72176.1;KEK13885.1;OTA49727.1;OTA79850.1;OTA88234.1…	AGN99346.1 degV family protein [Limosilactobacillus reuteri I5007];OTA83350.1 fatty acid-binding protein DegV [Limosilactobacillus reuteri];AMY13287.1 fatty acid-binding protein DegV [Limosilactobacillus reuteri];ANU51215.1 fatty acid-binding protein DegV	171	10	10	6	40.7	30.657	1824500	2157000	1990750	4664500	4923200	4793850	0.415272	0.00470863
KRK50255.1	KRK50255.1;PTS27624.1;ABQ83036.1;WP_217324421.1;WP_003668100.1;UPG78847.1;UNL37647.1;UHC32066.1;UGQ33466.1;QPB66115.1;QBE47312.1;PTS14827.1;OFB59352.1;OAV47674.1;EGC15248.1;EEI08441.1;CUR40643.1;BAG25258.1;AKP01014.1;TGB11705.1;RMX27389.1;WP_122481297.1	KRK50255.1 degV family protein [Limosilactobacillus reuteri subsp. reuteri];PTS27624.1 DegV family protein [Limosilactobacillus reuteri];ABQ83036.1 degV family protein [Limosilactobacillus reuteri subsp. reuteri];WP_217324421.1 DegV family protein [Limosil	22	5	1	1	22.2	31.207	379430	430470	404950	1115300	935600	1025450	0.3949	0.0110219
CUU11977.1	CUU11977.1;CUR37594.1;UZM90572.1;WP_080564807.1;WP_003674995.1;CCC03466.1;QKT16175.1;OUL52577.1;OTA90199.1;OTA87047.1;OTA76463.1;AMY14452.1;OTA70853.1;OTA45972.1;OYS68471.1;WP_063164373.1;OJI10855.1;OTA53250.1;WP_079376175.1;OTA71095.1;WP_168353428.1;UCN17834.1;UCN19600.1;UUW68161.1;WP_041821599.1;VTZ88696.1;WP_225359271.1;WP_185290955.1;WP_172397150.1;TGY60870.1;WP_168341791.1;WP_042229414.1;OTA…	CUU11977.1 phosphate ABC transporter substrate binding component [Limosilactobacillus reuteri subsp. suis];CUR37594.1 Phosphate ABC transporter, periplasmic phosphate-binding protein PstS (TC 3.A.1.7.1) [Limosilactobacillus reuteri];UZM90572.1 phosphate AB	238	8	8	8	52.4	31.379	360160	307570	333865	679760	1040800	860280	0.388089	0.00964274
AGN98845.1	AGN98845.1;OTA76865.1;OTA77315.1;OTA74145.1;OTA43718.1;OTA49474.1;OTA81618.1;OTA55340.1;OTA71943.1;CCC03256.1;OTA43926.1;CUU12211.1;QKT14910.1;UZM90843.1;WP_080564804.1;WP_086120641.1;OTA71458.1;WP_226062009.1;UCN19826.1;UCN18059.1;CUR37406.1;WP_152111265.1;WP_086141494.1;OTA47736.1;UAW59694.1;WP_229407270.1;OYS80805.1;OPG88171.1;VTZ92478.1;EDX42740.1;OYS63861.1;OYS60454.1;OYS55737.1;OYS59179.1;O…	AGN98845.1 ABC transporter ATP-binding component [Limosilactobacillus reuteri I5007];OTA76865.1 multidrug ABC transporter ATP-binding protein [Limosilactobacillus reuteri];OTA77315.1 multidrug ABC transporter ATP-binding protein [Limosilactobacillus reuter	223	14	14	3	55.4	32.766	3230800	3169700	3200250	8548800	8397400	8473100	0.377695	0.0017331
WP_094536559.1	WP_094536559.1;OYS70748.1;WP_094502550.1;OYS51832.1;OYS44461.1;WP_153706914.1	WP_094536559.1 4-hydroxy-tetrahydrodipicolinate synthase [Limosilactobacillus reuteri];OYS70748.1 4-hydroxy-tetrahydrodipicolinate synthase [Limosilactobacillus reuteri];WP_094502550.1 4-hydroxy-tetrahydrodipicolinate synthase [Limosilactobacillus reuteri]	6	11	1	0	61.2	33.795	166200	152200	159200	424780	430000	427390	0.372494	0.0400599
OTA78224.1	OTA78224.1;QKT15856.1;WP_229407623.1;WP_251939311.1;OTA47290.1;UAW60634.1;RNF37718.1;PWT62727.1;CCC04399.1;CUR36246.1;CUR43508.1;UCN17201.1;CUU13085.1;OJI10150.1;PWT51847.1;WP_229278929.1;PWT47599.1;OTA88025.1;OTA86641.1;OTA85593.1;OTA80217.1;OTA47241.1;OTA70862.1;OTA69787.1;OTA59366.1;OTA57334.1;OTA56171.1;OTA52663.1;WP_229284590.1;OTA47546.1;WP_223659538.1;VTZ88847.1;WP_086143353.1;WP_003676265…	OTA78224.1 lactate utilization protein C [Limosilactobacillus reuteri];QKT15856.1 lactate utilization protein C [Limosilactobacillus reuteri];WP_229407623.1 lactate utilization protein C [Limosilactobacillus reuteri];WP_251939311.1 lactate utilization prot	199	2	2	2	15.2	27.697	36474	45319	40896.5	90689	129640	110164	0.371231	0.0394279
EEI08410.1	EEI08410.1;WP_229287259.1;PTM28598.1;WP_065532867.1;WLR79861.1;WP_003670914.1;UAW61187.1;WP_003674218.1;WP_230212561.1;WP_229409351.1;WP_229288570.1;WP_229277504.1;WP_019251605.1;WP_219178678.1;UAW63254.1;WP_216578055.1;WP_169471980.1;WP_163621982.1;WP_153701333.1;WP_152711632.1;WP_152699321.1;WP_134907804.1;UCN18566.1;UFK66423.1;UGQ33475.1;UHC32075.1;VTZ89023.1;UFK67309.1;OCW63279.1;OCW63138.1;O…	EEI08410.1 putative acyl-phosphate glycerol 3-phosphate acyltransferase, partial [Limosilactobacillus reuteri MM2-3];WP_229287259.1 glycerol-3-phosphate 1-O-acyltransferase PlsY [Limosilactobacillus reuteri];PTM28598.1 glycerol-3-phosphate acyltransferase	186	1	1	1	11.5	12.051	5062.8	194610	99836.4	305270	239490	272380	0.366534	0.0371317
UPG78439.1	UPG78439.1;RMX28248.1;TGY60061.1;ROV63432.1;RNF37724.1;WJK30646.1;WP_003673186.1;WLC96195.1;WLR80364.1;WP_003670464.1;WP_181462296.1;OCW67626.1;WP_142499367.1;WP_134988607.1;WP_113896743.1;WP_094504031.1;WP_063164250.1;WP_019252145.1;WP_003676272.1;TSB19873.1;UAW60629.1;UAW62874.1;UCN18976.1;OYS66007.1;KRK50315.1;UNL40421.1;TGB11265.1;OYS99022.1;OYT10008.1;OYT02335.1;UZM89918.1;RMX24782.1;UXE8968…	UPG78439.1 PspC domain-containing protein [Limosilactobacillus reuteri];RMX28248.1 PspC domain-containing protein [Limosilactobacillus reuteri];TGY60061.1 PspC domain-containing protein [Limosilactobacillus reuteri];ROV63432.1 PspC domain-containing protei	169	4	4	4	31.6	10.776	22354	103320	62837	219700	129860	174780	0.359521	0.0338663
WP_229270612.1	WP_229270612.1	WP_229270612.1 bifunctional (p)ppGpp synthetase/guanosine-3,5-bis(diphosphate) 3-pyrophosphohydrolase [Limosilactobacillus reuteri]	1	36	1	1	51	84.579	456300	417230	436765	1369900	1070800	1220350	0.357901	0.00504328
WP_153700767.1	WP_153700767.1;UXE90330.1;WP_153702482.1;WP_134988956.1;WP_124216061.1;WP_122481261.1;WP_094512578.1;WP_086878981.1;WP_084405165.1;UUW69386.1;WP_019253388.1;PWT31929.1;WP_003667936.1;WJK31193.1;VTZ93099.1;UZM89487.1;UYQ75851.1;WP_229272084.1;OYS58139.1;OYS76480.1;PWT40588.1;PTV04340.1;OYS71612.1;OYS73874.1;OYS76224.1;EGC15129.1;WLR79818.1;UNL36084.1;WP_163622379.1;UPG79087.1;UCN16753.1;UCN18524.1…	WP_153700767.1 FeoB-associated Cys-rich membrane protein [Limosilactobacillus reuteri];UXE90330.1 FeoB-associated Cys-rich membrane protein [Limosilactobacillus reuteri];WP_153702482.1 FeoB-associated Cys-rich membrane protein [Limosilactobacillus reuteri]	140	2	2	2	26.1	5.2464	33059	40897	36978	97158	111920	104539	0.353724	0.0313123
ABQ82477.1	ABQ82477.1;PWT54638.1;ANU52402.1;BAG24713.1;EEI09695.1;EGC15826.1;KRK51636.1;OAV46712.1;OFB58965.1;OXE59866.1;OYS48934.1;OYS54853.1;OYS86505.1;PWT44307.1;OYS93783.1;OYS98515.1;OYS99434.1;OYT00368.1;PTS16344.1;PTS29764.1;PWT31435.1;PWT32719.1;PWT34857.1;PWT38472.1;PWT41651.1;OYS88962.1;UNL40585.1;AKP00434.1;OYS92993.1;PWT63900.1;PWT59265.1;PWT66067.1;PWT69289.1;QBE46750.1;QPB65552.1;QQR15396.1;ROV…	ABQ82477.1 hypothetical protein Lreu_0207 [Limosilactobacillus reuteri subsp. reuteri];PWT54638.1 IpaB/EvcA family protein [Limosilactobacillus reuteri];ANU52402.1 IpaB/EvcA family protein [Limosilactobacillus reuteri];BAG24713.1 conserved hypothetical pro	118	13	1	0	47	36.908	27817	10016	18916.5	41375	65855	53615	0.352821	0.0309259
OTA48869.1	OTA48869.1;WP_079376015.1;OPG88619.1;WP_216578060.1;OTA43930.1;WP_042746356.1;OTA54605.1;OTA62167.1;OTA66403.1;OTA68851.1;WP_035157678.1;WP_019253411.1;OTA74263.1;OTA77958.1;OTA79993.1;OTA81723.1;OTA44638.1;WP_016496895.1;WP_229267625.1;WP_229270499.1;WP_003674191.1;WP_003666100.1;VTZ91345.1;OJI11265.1;KGE69993.1;KEK16035.1;WP_170090812.1;WP_086141052.1;WP_086142150.1;WP_122481287.1;WP_134988939.…	OTA48869.1 gluconate kinase [Limosilactobacillus reuteri];WP_079376015.1 gluconokinase [Limosilactobacillus reuteri];OPG88619.1 gluconate kinase [Limosilactobacillus reuteri];WP_216578060.1 gluconokinase [Limosilactobacillus reuteri];OTA43930.1 gluconate k	247	9	8	8	26.7	55.086	106490	193960	150225	352910	524640	438775	0.342374	0.0266823
AAX82613.1	AAX82613.1;UNL37114.1;UAW62739.1;UIN25108.1;WLC96046.1;UNL40578.1;WP_066035775.1;WP_003665581.1;UIT54128.1;WJK30489.1;KGE72485.1;VTZ89509.1;UZM90071.1;UYQ75254.1;UXE89533.1;UUW68724.1;UPG78291.1;QQR15389.1;RMX24986.1;RMX27950.1;RNF37880.1;ROV63607.1;OTA75680.1;WLR80521.1;TSB20328.1;UAW60481.1;UHC31511.1;UGQ32914.1;UFK68460.1;UFK65724.1;UCN19130.1;UCN17362.1;QWS04422.1;OYS93000.1;QPB65559.1;TGY637…	AAX82613.1 putative VEG protein [Limosilactobacillus reuteri];UNL37114.1 hypothetical protein G8B26_07150 [Limosilactobacillus reuteri];UAW62739.1 Veg family protein [Limosilactobacillus reuteri];UIN25108.1 Veg family protein [Limosilactobacillus reuteri];	157	6	6	6	72.5	9.0923	307930	248030	277980	942050	759540	850795	0.32673	0.00230998
WP_229288335.1	WP_229288335.1	WP_229288335.1 iron-containing alcohol dehydrogenase [Limosilactobacillus reuteri]	1	22	1	1	59	42.208	8918.9	4031	6474.95	24474	16929	20701.5	0.312777	0.016806
AGO00017.1	AGO00017.1;WP_003674480.1;UCN17422.1;AMY13974.1;CCC03126.1;CUR37300.1;CUR43272.1;CUU13324.1;OTA47277.1;OTA47498.1;OTA51238.1;OTA53633.1;OTA65529.1;OTA75061.1;OTA75411.1;OTA81404.1;OTA82206.1;OTA89802.1;OTA91686.1;QDK49372.1;QKT16081.1;UCN19189.1;OTA47760.1;CUR39438.1;UFK65662.1;CUR41720.1;OON59618.1;OUN40325.1;OUP82127.1;PTM22213.1;PTM26813.1;QLL75251.1;QLQ62922.1;UFK68400.1;QIZ05248.1;WP_0856505…	AGO00017.1 molybdenum cofactor biosynthesis protein A [Limosilactobacillus reuteri I5007];WP_003674480.1 GTP 3,8-cyclase MoaA [Limosilactobacillus reuteri];UCN17422.1 GTP 3,8-cyclase MoaA [Limosilactobacillus reuteri];AMY13974.1 cyclic pyranopterin phosp	93	19	19	19	62.3	38.251	1831500	1344800	1588150	5606600	4572300	5089450	0.312047	0.00017758
WP_260240882.1	WP_260240882.1;WP_216270742.1;WP_123835690.1;UNL39755.1;ROV61437.1;QWS03258.1;WP_164960459.1	WP_260240882.1 DEAD/DEAH box helicase [Limosilactobacillus reuteri];WP_216270742.1 DEAD/DEAH box helicase [Limosilactobacillus reuteri];WP_123835690.1 DEAD/DEAH box helicase [Limosilactobacillus reuteri];UNL39755.1 DEAD/DEAH box helicase [Limosilactobacill	7	13	1	1	16	132.8	4534.4	13451	8992.7	11481	46922	29201.5	0.307953	0.0154792
AGN99299.1	AGN99299.1;UAW61216.1;UCN18533.1;UZM89496.1;CCC02899.1;CUR40097.1;CUR43835.1;CUU12635.1;OPG88583.1;OTA42787.1;OTA46426.1;OTA47091.1;OTA50244.1;OTA50883.1;OTA58057.1;OTA67599.1;OTA72383.1;OTA73201.1;OTA74715.1;OTA77904.1;OTA78950.1;OTA81927.1;OTA83629.1;OTA85698.1;QDK48642.1;RNF37294.1;UCN16762.1;WP_003674164.1;OJI11244.1;WP_153705069.1;WP_229307809.1;WP_086141192.1;WP_229277032.1;WP_162216432.1;W…	AGN99299.1 GTP cyclohydrolase II [Limosilactobacillus reuteri I5007];UAW61216.1 GTP cyclohydrolase II [Limosilactobacillus reuteri];UCN18533.1 GTP cyclohydrolase II [Limosilactobacillus reuteri];UZM89496.1 bifunctional 3,4-dihydroxy-2-butanone-4-phosphate	120	6	6	1	22.9	43.908	101280	12246	56763	137360	247040	192200	0.295333	0.0123541
WP_229306113.1	WP_229306113.1	WP_229306113.1 nitrate reductase subunit alpha [Limosilactobacillus reuteri]	1	55	1	0	56.3	138.86	9963.2	19883	14923.1	52763	48395	50579	0.295045	0.0122885
EGC15420.1	EGC15420.1;QWS04834.1;QLQ62371.1;QLL75700.1;WP_153701099.1;QBE47146.1;UAW63103.1;WP_003674418.1;WP_122481082.1;WP_086878892.1;QKT15641.1;QIZ04010.1;PWT67204.1;PUH34915.1;PWT61089.1;PWT65549.1;OTA71550.1;OTA65567.1;OTA60915.1;OTA56115.1;OTA51470.1;QPB65948.1;RMX27621.1;OTA43352.1;ROV63828.1;AEI58056.1;AGR64034.1;EEI08575.1;EEI65206.1;VTZ92998.1;UYQ75640.1;UXE89946.1;UPG78678.1;UNL40176.1;UNL37521.…	EGC15420.1 hypothetical protein HMPREF0536_11069 [Limosilactobacillus reuteri MM4-1A];QWS04834.1 DUF1831 domain-containing protein [Limosilactobacillus reuteri];QLQ62371.1 DUF1831 domain-containing protein [Limosilactobacillus reuteri];QLL75700.1 cysteine	111	6	1	1	60.7	13.567	258650	128450	193550	600480	804230	702355	0.275573	0.00839528
AGN98787.1	AGN98787.1;OTA76320.1;CCC03308.1;EDX42799.1;OTA91264.1;OTA82880.1;OTA78015.1;OTA75887.1;OTA42651.1;OTA69817.1;OTA68197.1;OTA66393.1;OTA66352.1;OTA54871.1;OTA52391.1;OTA52385.1;OTA45967.1;OPG88105.1;OTA85249.1;RMX24472.1;CUR42752.1;CUR37833.1;UCN18004.1;WP_229283072.1;WP_229274520.1;WP_124216538.1;WP_003664437.1;VTZ93553.1;UCN19771.1;RNF36887.1;WP_231127650.1;OTA51733.1;RMX26781.1;TGB10512.1;AMY14…	AGN98787.1 LytTr DNA-binding domain-containing protein [Limosilactobacillus reuteri I5007];OTA76320.1 histidine kinase [Limosilactobacillus reuteri];CCC03308.1 conserved hypothetical protein [Limosilactobacillus reuteri subsp. suis];EDX42799.1 response reg	158	5	5	5	47.9	16.665	180260	128590	154425	521490	603890	562690	0.274441	0.00820042
OTA74258.1	OTA74258.1;AMY13265.1;CUR36966.1;CUR43292.1;CUU12659.1;OCW61521.1;OCW63146.1;OCW63271.1;OCW68996.1;OJI11270.1;CCC02922.1;OON66569.1;OTA43006.1;OTA43935.1;OTA44643.1;OTA48222.1;OTA48864.1;OTA53047.1;OYS62906.1;OPG88613.1;OYS63160.1;ANU51233.1;OTA62161.1;UCN16785.1;OYS48567.1;OTA77963.1;QQR14829.1;OTA81728.1;OTA82535.1;OTA86574.1;OUL54422.1;OUN45423.1;OTA74248.1;OUP87161.1;OYS45365.1;OTA79998.1;OYS…	OTA74258.1 alkaline-shock protein [Limosilactobacillus reuteri];AMY13265.1 alkaline-shock protein [Limosilactobacillus reuteri];CUR36966.1 alkaline shock protein 23 [Limosilactobacillus reuteri];CUR43292.1 alkaline shock protein 23 [Limosilactobacillus reu	181	7	7	7	63.8	13.857	1196800	1474600	1335700	5119200	4887500	5003350	0.266961	0.000336091
CCC04333.1	CCC04333.1;CUR43239.1;CUU13020.1;OTA78529.1;WP_003676192.1;WP_117114949.1;VTZ90210.1;QKT15805.1;RNF37659.1;UCN17131.1;UCN18901.1;WP_123072580.1;WP_016497025.1;WP_086131696.1;OTA88046.1;WP_229308113.1;QDK49088.1;OTA79166.1;OTA81870.1;OTA64920.1;OTA55709.1;OTA47850.1;OTA47582.1;OTA45774.1;OPG89020.1;OJI10085.1;AGN99699.1;UZM89861.1;CUR36303.1;WP_229283101.1	CCC04333.1 xylulose kinase [Limosilactobacillus reuteri subsp. suis];CUR43239.1 Xylulose kinase [Limosilactobacillus reuteri];CUU13020.1 Xylulose kinase [Limosilactobacillus reuteri subsp. suis];OTA78529.1 xylulokinase [Limosilactobacillus reuteri];WP_0036	30	12	12	2	35.9	55.888	273100	236240	254670	820380	1110900	965640	0.263732	0.000296648
AMY13688.1	AMY13688.1;OCW70269.1;OTA44610.1;OTA81869.1;OTA84108.1;OYS69045.1;RMX25055.1;WP_003676193.1;WP_229274919.1;KEK14769.1;CUU13021.1;CUR43240.1;OJI10086.1;CCC04334.1;RNF37660.1;WP_003666507.1;WP_094511652.1;OYT00969.1;OYS99249.1;OYS98027.1;OYS96190.1;OYS93189.1;OYS90880.1;OYS90723.1;OYS53313.1;WP_123072581.1;WP_094501928.1;EDX41975.1;WP_153706837.1;OYS48147.1;PTV05274.1;WP_107720660.1;AAT98631.1;WP_0…	AMY13688.1 xylose isomerase [Limosilactobacillus reuteri];OCW70269.1 xylose isomerase [Limosilactobacillus reuteri];OTA44610.1 xylose isomerase [Limosilactobacillus reuteri];OTA81869.1 xylose isomerase [Limosilactobacillus reuteri];OTA84108.1 xylose isomer	62	27	27	1	69.7	51.221	3741900	3519100	3630500	14882000	13226000	14054000	0.258325	1.30704e-05
OFB57237.1	OFB57237.1;WP_085650105.1;WP_169473134.1;WP_163622381.1;WP_229306389.1;WP_229288730.1;WP_229285145.1;WP_229280072.1;WP_229277035.1;WP_229272087.1;WP_217324560.1;WP_153706128.1;WP_109883366.1;WP_102815823.1;WP_153704340.1;WP_153701320.1;WP_152727192.1;WP_135950645.1;WP_134988953.1;WP_134907313.1;WP_122481264.1;WP_094500849.1;WP_283580987.1;OYS71615.1;UPG79090.1;UIT54768.1;UNL36079.1;UIN26411.1;WP_…	OFB57237.1 aromatic compound catabolic protein, partial [Limosilactobacillus reuteri];WP_085650105.1 PaaI family thioesterase [Limosilactobacillus reuteri];WP_169473134.1 PaaI family thioesterase [Limosilactobacillus reuteri];WP_163622381.1 PaaI family thi	180	1	1	1	22.2	8.6688	24337	43826	34081.5	93524	175960	134742	0.252939	0.00508765
WP_132139971.1	WP_132139971.1	WP_132139971.1 glutamate 5-kinase [Limosilactobacillus reuteri]	1	3	3	1	19.8	28.58	33063	14900	23981.5	93764	98806	96285	0.249068	0.00463669
WP_153706973.1	WP_153706973.1;WP_094501501.1;OYS54406.1;OYS45877.1;WP_229287009.1;WP_273774412.1;WP_229408561.1;WP_229407453.1;OYS97040.1;OYS87676.1;OYS91552.1;WP_229268934.1;OYS95086.1;OYS94731.1;OYT01462.1;WP_094511962.1;WP_169471505.1;WP_136000681.1;WP_122481053.1;OYT00053.1;TGY64715.1;TGB11914.1;RMX27828.1;UGQ32570.1;UHC31165.1;WP_153702775.1;WP_003669271.1;OYS50467.1;OYS51499.1;OYS57946.1;UPG77946.1;OYS846…	WP_153706973.1 M13-type metalloendopeptidase [Limosilactobacillus reuteri];WP_094501501.1 M13-type metalloendopeptidase [Limosilactobacillus reuteri];OYS54406.1 peptidase M13 [Limosilactobacillus reuteri];OYS45877.1 peptidase M13 [Limosilactobacillus reute	121	29	3	3	44.6	72.343	493080	15204	254142	747370	1400600	1073985	0.236635	9.33598e-05
WP_153701280.1	WP_153701280.1	WP_153701280.1 bifunctional acetaldehyde-CoA/alcohol dehydrogenase [Limosilactobacillus reuteri]	1	33	1	1	45	97.199	89924	87224	88574	124300	687130	405715	0.218316	0.00202859
VTZ88843.1	VTZ88843.1;OYS99030.1;OYS76356.1;OYS73917.1;OYS95928.1;OYS96900.1;OYS81532.1;OYS80055.1;OYS66527.1;OYT01886.1;OYT05772.1;OYS77956.1;OYS70890.1;OCW71079.1;OYS69669.1;QLL75483.1;OPG89051.1;OTA78226.1;OYS84777.1;OYS84813.1;AMY13749.1;OYS65999.1;OYS58265.1;OYS56245.1;OYT10000.1;OYS86927.1;OYS61872.1;OUN45356.1;OYS54129.1;OYS60938.1;OTA86643.1;OTA85591.1;OTA80219.1;QIZ05283.1;OYS50683.1;OUP86920.1;OYT…	VTZ88843.1 Lactate utilization protein A [Limosilactobacillus reuteri];OYS99030.1 Fe-S oxidoreductase [Limosilactobacillus reuteri];OYS76356.1 Fe-S oxidoreductase [Limosilactobacillus reuteri];OYS73917.1 Fe-S oxidoreductase [Limosilactobacillus reuteri];OY	192	4	4	4	20.8	33.716	36708	34830	35769	185240	149120	167180	0.213955	0.00177793
WP_289218300.1	WP_289218300.1;WJK30277.1	WP_289218300.1 DNA gyrase subunit A [Limosilactobacillus reuteri];WJK30277.1 DNA gyrase subunit A [Limosilactobacillus reuteri]	2	36	1	1	46.6	92.757	1421.7	331990	166706	14425	1575100	794762	0.209756	0.00155968
AGO00045.1	AGO00045.1;OTA51613.1;CUR36673.1;CUR42538.1;CUU13365.1;OJI10407.1;OPG89290.1;OTA43482.1;OTA46859.1;OTA90559.1;QDK49398.1;OTA52010.1;OTA60569.1;OTA64975.1;OTA73581.1;OTA75520.1;OTA80065.1;OTA85169.1;CCC04083.1;AMY14003.1;OTA50088.1;QKT16117.1;RNF37954.1;TGB10050.1;UCN17449.1;UCN19216.1;UZM90169.1;VTZ90105.1;WP_003675915.1;WP_016497174.1;WP_086142428.1;WP_229272516.1;WP_229276560.1;WP_229280352.1;W…	AGO00045.1 aspartate carbamoyltransferase [Limosilactobacillus reuteri I5007];OTA51613.1 aspartate carbamoyltransferase [Limosilactobacillus reuteri];CUR36673.1 Aspartate carbamoyltransferase [Limosilactobacillus reuteri];CUR42538.1 Aspartate carbamoyltran	193	6	6	6	28.8	34.312	41146	30669	35907.5	174010	176870	175440	0.204671	0.00132374
WP_163621952.1	WP_163621952.1;OTA88216.1;PTS14809.1;OTA71189.1;OCX50093.1;OTA72158.1;OCW69688.1;OCW69631.1;AKP00996.1;AMY13305.1;BAG25241.1;CCC02959.1;CUR37454.1;CUR38157.1;CUR40625.1;CUR43687.1;AGR65112.1;CUU12698.1;KEK13868.1;KGE70033.1;KRK50273.1;OAV47656.1;OCW61668.1;OTA88442.1;OTA83333.1;OCW65370.1;OTA79868.1;WP_216578043.1;WP_285227475.1;WP_285142381.1;WP_229283591.1;WP_229280045.1;WP_229268684.1;EEI08423…	WP_163621952.1 reductase [Limosilactobacillus reuteri];OTA88216.1 reductase [Limosilactobacillus reuteri];PTS14809.1 reductase [Limosilactobacillus reuteri];OTA71189.1 reductase [Limosilactobacillus reuteri];OCX50093.1 reductase [Limosilactobacillus reuter	180	4	4	4	44.9	13.969	35928	97006	66467	268620	404060	336340	0.197618	0.00104333
ABI26416.1	ABI26416.1	ABI26416.1 translation elongation factor G, partial [Limosilactobacillus reuteri]	1	25	1	1	64.4	47.726	35428	67772	51600	264400	258320	261360	0.197429	0.00103649
WP_003674718.1	WP_003674718.1;UZM90840.1;RNF36869.1;OTA87856.1;OTA75379.1;OTA47877.1;OTA47184.1;OTA45278.1;CUU12208.1;CCC03258.1;WP_169477496.1	WP_003674718.1 cold-shock protein [Limosilactobacillus reuteri];UZM90840.1 cold-shock protein [Limosilactobacillus reuteri];RNF36869.1 cold-shock protein [Limosilactobacillus reuteri];OTA87856.1 cold-shock protein [Limosilactobacillus reuteri];OTA75379.1 c	11	8	8	6	81.8	7.2839	4798100	4130100	4464100	26565000	19997000	23281000	0.191749	1.03133e-07
WP_169471953.1	WP_169471953.1;WP_169472530.1;PWT34231.1;PWT38327.1;AEI58206.1;AXX73575.1;EDX41549.1;EEI65188.1;KEK13861.1;KEK15938.1;KEQ20464.1;OCX50102.1;OON66637.1;OUN48959.1;OUP89088.1;OYS59871.1;OYS61445.1;OYS72691.1;PWT32048.1;OYS64497.1;OYS76749.1;OYS78825.1;OYS89081.1;OYT03206.1;OYT03725.1;OYT03919.1;OYT09130.1;PIN31154.1;PTM28633.1;PTM30844.1;PUH36117.1;PUH36410.1;PWT30480.1;OYS75150.1;WP_162216091.1;TG…	WP_169471953.1 aminotransferase class I/II-fold pyridoxal phosphate-dependent enzyme [Limosilactobacillus reuteri];WP_169472530.1 aminotransferase class I/II-fold pyridoxal phosphate-dependent enzyme [Limosilactobacillus reuteri];PWT34231.1 amino acid amin	135	18	1	0	53	43.078	27657	66638	47147.5	426290	70707	248498	0.18973	0.00078699
KRK51008.1	KRK51008.1;VTZ88550.1;UIN24974.1;UNL37224.1;QQR15281.1;WP_229410432.1;WP_003666324.1;WLR80709.1;WLC96154.1;UIT54260.1;KEK15268.1;UZM89959.1;UYQ75365.1;UXE89642.1;UUW68849.1;UPG78399.1;UNL40461.1;QWS04533.1;RMX24742.1;RMX28204.1;RNF37766.1;ROV62903.1;OTA80383.1;TSB20558.1;UAW60592.1;TGY61871.1;UGQ33023.1;UFK68567.1;UFK65833.1;UCN19016.1;UCN17246.1;UAW62840.1;OYS90779.1;QPB65669.1;UHC31620.1;TGY495…	KRK51008.1 hypothetical protein FC53_GL001792 [Limosilactobacillus reuteri subsp. reuteri];VTZ88550.1 Glutaredoxin-like protein NrdH [Limosilactobacillus reuteri];UIN24974.1 glutaredoxin-like protein NrdH [Limosilactobacillus reuteri];UNL37224.1 glutaredox	156	2	2	2	64.4	6.8057	71325	114840	93082.5	508030	594230	551130	0.168894	0.000340685
ABO43832.1	ABO43832.1;OXE59323.1;PTM28618.1;ANU51203.1;EEI66668.1;OON66622.1;OUN48974.1;OUP89073.1;WP_153702521.1;WP_085679575.1;AEI58222.1;PTM30859.1;PUH35003.1;PUH35185.1;QIZ04212.1;QLL75958.1;QQR14858.1;WP_078009090.1;PIN30483.1;UFK66402.1;UFK67328.1;UIN26467.1;UIT54711.1;WLC96635.1;WP_003670891.1;WP_065532855.1;UAW61168.1;WP_085649504.1;TGY48468.1;WP_085719851.1;WP_087214831.1;WP_098039494.1;WP_13595107…	ABO43832.1 RecQ [Limosilactobacillus reuteri];OXE59323.1 ATP-dependent DNA helicase RecQ [Limosilactobacillus reuteri];PTM28618.1 ATP-dependent DNA helicase RecQ [Limosilactobacillus reuteri];ANU51203.1 recombinase RecQ [Limosilactobacillus reuteri];EEI666	145	6	6	0	18.4	54.326	31185	41037	36111	182030	279500	230765	0.156484	0.000191661
WP_267493727.1	WP_267493727.1;TGY47896.1;WLC96290.1;WJK30757.1;UYQ75487.1;UXE89783.1;UUW68987.1;UPG78527.1;UNL40324.1;UNL37317.1;UHC31749.1;UGQ33152.1;UAW62955.1;UAW60712.1;TSB19071.1;PWT64561.1;TGB12781.1;WP_003672585.1;ROV62960.1;RNF37624.1;RMX25314.1;RMX25075.1;QWS05404.1;QQR15146.1;QPB65796.1;QLL75551.1;QIZ03869.1;QDR73055.1;QDK49070.1;PWT68994.1;OYS90703.1;QBE46993.1;WP_003667545.1;PWT65806.1;OYS50988.1;PT…	WP_267493727.1 hypothetical protein [Limosilactobacillus reuteri];TGY47896.1 hypothetical protein E5338_05845 [Limosilactobacillus reuteri];WLC96290.1 hypothetical protein LDE72_02580 [Limosilactobacillus reuteri];WJK30757.1 hypothetical protein QSJ16_1016	134	1	1	1	17.4	10.461	92805	69972	81388.5	806910	425570	616240	0.132073	4.95713e-05
AXX73903.1	AXX73903.1;OYS82033.1;WP_094508071.1;OYS48146.1;OYS50061.1;OYS50892.1;OYS53150.1;OYS53312.1;OYS55170.1;OYS57051.1;WP_113896711.1;WP_113898064.1;OYS82945.1;OYS85597.1;TGY64408.1;WJK30716.1;WP_094501926.1;OYS72101.1;OYS67759.1;WP_229283660.1;WP_285143005.1;WP_136000763.1;WP_229274338.1;WP_229267679.1;WP_153702683.1;WP_257496664.1;OTA84109.1;OTA71679.1;KEK14770.1;OYS61934.1;WP_260235221.1;OTA77217.1…	AXX73903.1 xylulokinase [Limosilactobacillus reuteri];OYS82033.1 xylulokinase [Limosilactobacillus reuteri];WP_094508071.1 xylulokinase [Limosilactobacillus reuteri];OYS48146.1 xylulokinase [Limosilactobacillus reuteri];OYS50061.1 xylulokinase [Limosilacto	156	11	1	1	32.9	55.736	23858	20620	22239	158520	189800	174160	0.127693	3.74236e-05
AMY13198.1	AMY13198.1;OYT02543.1;OTA50286.1;OTA50475.1;OTA56354.1;OTA58692.1;OTA59488.1;OTA72626.1;OTA72680.1;OTA73575.1;EDX41770.1;OJI11203.1;OTA77862.1;OTA83283.1;OYS45065.1;OYS46770.1;OYS97248.1;OYS97685.1;OYS76515.1;OYT02655.1;WP_162216462.1;WP_229304610.1;WP_260234655.1;OTA79306.1;WP_153707062.1;OPG88546.1;CUU12589.1;OYS92178.1;OYS78431.1;OYS60422.1;OYS57845.1;OYS63487.1;OYS63679.1;OYS67386.1;OYS67714.…	AMY13198.1 NrdI family protein [Limosilactobacillus reuteri];OYT02543.1 NrdI family protein [Limosilactobacillus reuteri];OTA50286.1 NrdI family protein [Limosilactobacillus reuteri];OTA50475.1 NrdI family protein [Limosilactobacillus reuteri];OTA56354.1 N	206	2	2	1	17.1	18.079	16724	30853	23788.5	303490	93506	198498	0.119843	2.18107e-05
AGN99678.1	AGN99678.1;OTA55728.1;VTZ89911.1;OTA78811.1;OTA77498.1;OTA74853.1;CCC04313.1;CUR37257.1;CUR38848.1;CUR41416.1;CUR43621.1;CUU12996.1;OJI10055.1;OPG88955.1;AMY13653.1;OTA43848.1;OTA46946.1;OTA47831.1;OTA49188.1;OTA54096.1;OTA45846.1;OTA71303.1;OTA70914.1;UZM89840.1;OTA66219.1;QKT15787.1;OTA83758.1;OTA88065.1;QDK49069.1;RMX25313.1;RNF37623.1;TGB12782.1;UCN17113.1;OTA84555.1;UCN18883.1;WP_003676161.1…	AGN99678.1 glutamine amidotransferase domain-containing protein [Limosilactobacillus reuteri I5007];OTA55728.1 glutamine amidotransferase [Limosilactobacillus reuteri];VTZ89911.1 Cobyric acid synthase [Limosilactobacillus reuteri];OTA78811.1 glutamine amid	179	12	12	7	49.4	26.134	2023200	2009300	2016250	20549000	19691000	20120000	0.100211	1.20629e-13
EEI09575.1	EEI09575.1;WP_260240956.1;PWT32739.1;OTA74041.1;WP_229288127.1;PTS24813.1;UGQ32159.1;UCN19069.1;UCN17301.1;OYS94968.1;UAW62361.1;OYS99037.1;OYS99039.1;OTA74769.1;UAW60978.1;OJI11476.1;UNL36402.1;CUR37357.1;CCC04337.1;OTA55343.1;OFB60142.1;WP_152720745.1;KRK45497.1;QPB66686.1;OAV46975.1;OTA63977.1;WP_265486254.1;WP_260235492.1;AMY14670.1;OYS92599.1;CUR43243.1;AGN99880.1;OTA47744.1;OTA51390.1;AMY13…	EEI09575.1 IstB-like ATP-binding protein [Limosilactobacillus reuteri MM2-3];WP_260240956.1 IS21-like element helper ATPase IstB, partial [Limosilactobacillus reuteri];PWT32739.1 transposase [Limosilactobacillus reuteri];OTA74041.1 transposase [Limosilacto	361	6	6	6	30.2	29.105	17889	2701.1	10295	1171400	234100	702750	0.0146497	9.67557e-17
WP_134906872.1	WP_134906872.1;PWT63849.1;PWT53240.1;PWT48588.1	WP_134906872.1 tape measure protein [Limosilactobacillus reuteri];PWT63849.1 tape measure protein [Limosilactobacillus reuteri];PWT53240.1 tape measure protein [Limosilactobacillus reuteri];PWT48588.1 tape measure protein [Limosilactobacillus reuteri]	4	1	1	1	1.4	166.17	1511.6	16292	8901.8	1880000	1257.8	940629	0.00946367	5.51478e-20
ABQ82771.1	ABQ82771.1;PWT62085.1;OCW67695.1;OCW69508.1;OCX49790.1;OJI10001.1;OPG88916.1;OYS55078.1;OTA61697.1;OTA68185.1;OTA72614.1;OTA73148.1;OTA78538.1;OTA79886.1;OCW64956.1;OCW62187.1;OAV47412.1;KEK13725.1;ADD37852.1;AGN99623.1;AGR63931.1;AKP00743.1;AMY13599.1;ANU50971.1;AWD61965.1;BAG25005.1;OTA82947.1;QQR15093.1;CCC04261.1;CUR42974.1;CUU12942.1;EEI10029.1;OCW66795.1;QPB65848.1;UAW60761.1;RMX25129.1;WP_…	ABQ82771.1 thiamine biosynthesis/tRNA modification protein ThiI [Limosilactobacillus reuteri subsp. reuteri];PWT62085.1 tRNA 4-thiouridine(8) synthase ThiI [Limosilactobacillus reuteri];OCW67695.1 tRNA 4-thiouridine(8) synthase ThiI [Limosilactobacillus re	189	24	24	24	64.8	45.726	10412000	11693000	11052500	24195000	19341000	21768000	0.507741	0.0294602
WP_065867824.1	WP_065867824.1;OTA79320.1;UZM89437.1;TGY49859.1;PWT64094.1;PWT52473.1;PWT57099.1;QQR14754.1;PWT34232.1;OXE59216.1;EEI08795.1;EEI65492.1;QPB66359.1;TSB19754.1;OTA50357.1;OTA56368.1;UYQ75901.1;UAW61628.1;UPG79040.1;OON61846.1;OPG88542.1;OTA42415.1;OTA45150.1;OTA47208.1;OTA58706.1;WP_035160101.1;OTA72640.1;OTA72664.1;OTA73561.1;PWT40427.1;EGC15078.1;PWT62583.1;VTZ93328.1;WP_098039516.1;WP_181388829.…	WP_065867824.1 GNAT family N-acetyltransferase [Limosilactobacillus reuteri];OTA79320.1 GNAT family N-acetyltransferase [Limosilactobacillus reuteri];UZM89437.1 GNAT family N-acetyltransferase [Limosilactobacillus reuteri];TGY49859.1 GNAT family N-acetyltr	177	7	7	7	44.8	19.99	3931400	5023900	4477650	7153100	9651100	8402100	0.53292	0.0432786
WP_003664604.1	WP_003664604.1;WJK31893.1;VTZ88418.1;UZM90644.1;UYQ74669.1;UXE88855.1;UPG79509.1;UNL41212.1;UNL36511.1;UHC30892.1;UGQ32297.1;UCN19671.1;UCN17905.1;UAW62138.1;UAW59851.1;TSB20093.1;TGY64546.1;ROV64173.1;RNF36804.1;RMX25742.1;QWS03791.1;QPB66822.1;QKT14767.1;QDK47983.1;QBE46136.1;PWT69029.1;PWT66355.1;PWT64126.1;PWT59532.1;PWT58232.1;PWT54386.1;PWT44080.1;PWT42383.1;PWT41386.1;PWT37375.1;PWT34991.1…	WP_003664604.1 cold-shock protein [Limosilactobacillus reuteri];WJK31893.1 cold-shock protein [Limosilactobacillus reuteri];VTZ88418.1 Cold shock-like protein CspLA [Limosilactobacillus reuteri];UZM90644.1 cold-shock protein [Limosilactobacillus reuteri];U	97	7	7	2	89.4	7.3269	53435000	35045000	44240000	76255000	92235000	84245000	0.525135	0.0385908
OTA45808.1	OTA45808.1;WP_003674001.1;OJI11126.1;CUR44162.1;OTA63874.1;OTA57796.1;OTA51679.1;OTA45323.1;OPG88441.1;CUU12508.1;CCC02775.1;OJI11579.1;OTA73013.1;QKT15321.1;OTA78308.1;OTA72262.1;VTZ94093.1;UZM89370.1;UCN18409.1;OTA75257.1;OTA78596.1;OTA86349.1;RNF37641.1;UCN16637.1;AGN99170.1;QDK48519.1;WP_086135851.1;CUR37774.1;OTA85919.1;WP_229273753.1;UIT54886.1;UUW67519.1;UFK67098.1;UIN26294.1;QLQ61355.1;UF…	OTA45808.1 molybdopterin-guanine dinucleotide biosynthesis protein B [Limosilactobacillus reuteri];WP_003674001.1 molybdopterin-guanine dinucleotide biosynthesis protein B [Limosilactobacillus reuteri];OJI11126.1 molybdopterin-guanine dinucleotide biosynth	99	7	7	2	70.4	17.857	19223000	18356000	18789500	34223000	38335000	36279000	0.517917	0.0345829
AGN99624.1	AGN99624.1;OTA72613.1;OTA68184.1;AMY13600.1;CCC04262.1;CUR42975.1;CUU12943.1;OJI10002.1;OPG88915.1;OTA45181.1;OTA50025.1;OTA50437.1;OTA51853.1;OTA56710.1;OTA61696.1;CUR38019.1;WP_003676098.1;QKT15741.1;OTA73149.1;UZM89792.1;UCN18837.1;UCN17066.1;RNF37576.1;VTZ88351.1;QDK49027.1;OTA82948.1;OTA79887.1;OTA78537.1;OTA90912.1;OTA73555.1;WP_122481866.1;RMX25128.1;RMX25257.1;TGB12838.1;WP_229277457.1;OT…	AGN99624.1 cysteine desulfurase [Limosilactobacillus reuteri I5007];OTA72613.1 aminotransferase V [Limosilactobacillus reuteri];OTA68184.1 aminotransferase V [Limosilactobacillus reuteri];AMY13600.1 aminotransferase V [Limosilactobacillus reuteri];CCC04262	63	35	35	2	84.8	42.113	17099000	16960000	17029500	35048000	32646000	33847000	0.503132	0.0273341
OTA59496.1	OTA59496.1;WP_123072547.1;OTA58700.1;WP_229407354.1;WP_229307934.1;WP_229284462.1;WP_229277051.1;CUR37045.1;CUR43135.1;CUU12581.1;OPG88536.1;OTA45156.1;OTA47202.1;OTA50483.1;OTA56362.1;OTA77795.1;OTA50351.1;WP_086141919.1;QDK48588.1;OTA72634.1;AMY13190.1;CCC02846.1;WP_086120372.1;OTA79314.1;OTA84995.1;OTA73567.1;RNF37242.1;UCN16708.1;UCN18480.1;VTZ93353.1;WP_003674105.1;WP_079376050.1;OYS71569.1;…	OTA59496.1 hypothetical protein BHL93_01495 [Limosilactobacillus reuteri];WP_123072547.1 NFACT RNA binding domain-containing protein [Limosilactobacillus reuteri];OTA58700.1 hypothetical protein BHL92_05590 [Limosilactobacillus reuteri];WP_229407354.1 NFAC	244	29	29	29	54.8	63.655	2911500	2639000	2775250	5713800	5216700	5465250	0.507799	0.029488
CCC03797.1	CCC03797.1;RNF38001.1;WP_003675476.1;VTZ88100.1;CUU11616.1;QDK47666.1;QKT14444.1;OTA68213.1;OTA58498.1;OTA50604.1;OTA50123.1;OTA46966.1;OTA46720.1;OTA45687.1;OPG89379.1;OJI10524.1;CUR42732.1;CUR36698.1;OTA83865.1;OTA85977.1;OTA87730.1;OTA79027.1;OTA69878.1;OTA73342.1;OTA75034.1;WP_086141526.1;WP_072575237.1;UZM90283.1;UCN19334.1;UCN17568.1;OTA72443.1;OTA79381.1;AMY14121.1;WP_063164319.1;AGN98287.…	CCC03797.1 NADH oxidase [Limosilactobacillus reuteri subsp. suis];RNF38001.1 NADH oxidase [Limosilactobacillus reuteri];WP_003675476.1 FAD-dependent oxidoreductase [Limosilactobacillus reuteri];VTZ88100.1 NADH oxidase [Limosilactobacillus reuteri];CUU11616	184	18	18	2	62.6	49.547	18009000	18488000	18248500	33970000	36848000	35409000	0.515363	0.0332406
AAC45332.1	AAC45332.1	AAC45332.1 high affinity cystine binding protein [Limosilactobacillus reuteri]	1	14	1	1	38.6	28.627	211770	194120	202945	58340	270900	164620	1.23281	0.804671
WP_094509846.1	WP_094509846.1;CBF98354.1;OCX47382.1;OCW71631.1;OPG89193.1;OCW68100.1;OCW65909.1;AGN99922.1;AMY13887.1;ANU52438.1;AXX74098.1;CBF85696.1;CBF94798.1;CBG06603.1;OXE59830.1;CBG12121.1;OYS49671.1;CBV01843.1;OTA74824.1;CBV11874.1;CBV25635.1;CCC03217.1;CUR36558.1;CUU13233.1;EDX43591.1;KGE72455.1;OYS46441.1;OUL55353.1;OCW63047.1;OTA47359.1;WP_229272393.1;WP_229274082.1;WP_229282474.1;WP_285142885.1;WP_15…	WP_094509846.1 DEAD/DEAH box helicase [Limosilactobacillus reuteri];CBF98354.1 unnamed protein product [Limosilactobacillus reuteri];OCX47382.1 ATP-dependent RNA helicase [Limosilactobacillus reuteri];OCW71631.1 ATP-dependent RNA helicase [Limosilactobacil	205	28	28	28	67.8	56.44	11844000	11978000	11911000	15098000	15507000	15302500	0.77837	0.424888
Q8VS53.1	sp|Q8VS53.1|PYRH_LIMRT;AAL60143.1	sp|Q8VS53.1|PYRH_LIMRT RecName: Full=Uridylate kinase; Short=UK; AltName: Full=Uridine monophosphate kinase; Short=UMP kinase; Short=UMPK;AAL60143.1 uridylate kinase [Limosilactobacillus reuteri]	2	7	1	1	35	25.958	1017500	997220	1007360	1361400	1319100	1340250	0.751621	0.40866
Q8VS52.1	sp|Q8VS52.1|RRF_LIMRT;AAL60144.1	sp|Q8VS52.1|RRF_LIMRT RecName: Full=Ribosome-recycling factor; Short=RRF; AltName: Full=Ribosome-releasing factor;AAL60144.1 ribosome recycling factor [Limosilactobacillus reuteri]	2	4	3	3	14	20.576	1249100	1316000	1282550	1495400	2150000	1822700	0.703654	0.316316
WP_086142484.1	WP_086142484.1;UAW62885.1;WP_229289196.1;WP_223659547.1;WP_169472677.1;WP_162216300.1;WP_152744647.1;WP_152697738.1;WP_134907257.1;QIZ03807.1;WP_124216432.1;WP_123072586.1;WP_094511370.1;TGB11254.1;ROV63420.1;UFK65889.1;UCN18965.1;WP_273774774.1;QDR73133.1;QBE46919.1;OJI10145.1;OTA56165.1;OTA48086.1;OTA47541.1;OTA45418.1;OCW62304.1;OPG89054.1;KRK50327.1;OCW61306.1;OFB59779.1;OCX48405.1;OCW71076.1…	WP_086142484.1 acyl-CoA thioesterase [Limosilactobacillus reuteri];UAW62885.1 acyl-CoA thioesterase [Limosilactobacillus reuteri];WP_229289196.1 acyl-CoA thioesterase [Limosilactobacillus reuteri];WP_223659547.1 acyl-CoA thioesterase [Limosilactobacillus r	181	5	5	1	40.5	16.795	770150	750950	760550	720250	669110	694680	1.09482	0.866087
AAP94111.1	AAP94111.1;OPG87767.1;PTS16789.1;OTA84123.1;OYS45863.1;OYS54392.1;OYS87689.1;OYS91539.1;OYS94744.1;OYS95099.1;OYS97027.1;OYT00066.1;OTA45736.1;OTA43104.1;OTA49399.1;OJI10633.1;KEK14061.1;ABQ84051.1;AKP02022.1;AMY14243.1;AWD63337.1;BAG26213.1;CCC03667.1;CUR37295.1;CUR39140.1;CUR41016.1;OYT01449.1;CUR42860.1;OTA89103.1;EDX43189.1;OTA82871.1;OTA79356.1;OTA77561.1;OTA73636.1;WP_229269489.1;WP_1242162…	AAP94111.1 autolysin-like protein [Limosilactobacillus reuteri subsp. reuteri];OPG87767.1 mannosyl-glycoprotein endo-beta-N-acetylglucosamidase [Limosilactobacillus reuteri];PTS16789.1 mannosyl-glycoprotein endo-beta-N-acetylglucosamidase [Limosilactobacil	204	7	7	7	38.6	22.38	1080800	875420	978110	717060	596030	656545	1.48978	0.340285
AAP97043.1	AAP97043.1;WP_085649419.1;WP_003666663.1;WLR80190.1;WLC96357.1;WJK30821.1;VTZ88389.1;UZM89772.1;UYQ75556.1;WP_169472634.1;UUW69059.1;UPG78597.1;WP_181462720.1;WP_229270227.1;WP_229288291.1;PWT36549.1;PWT64640.1;PWT66813.1;WP_169478017.1;UXE89854.1;OFB59822.1;OYS46379.1;OCW69490.1;OCW67677.1;OCW66813.1;OCW64498.1;OCW62169.1;OAV47430.1;PTM27102.1;WP_016496992.1;WP_086142421.1;WP_065532740.1;WP_1349…	AAP97043.1 putative CDP-diacylglycerol-glycerol-3-phosphate 3-phosphatidyltransferase, partial [Limosilactobacillus reuteri subsp. reuteri];WP_085649419.1 CDP-diacylglycerol--glycerol-3-phosphate 3-phosphatidyltransferase [Limosilactobacillus reuteri];WP_0	175	4	4	4	27.7	15.461	1135700	1033500	1084600	911520	912050	911785	1.18953	0.703897
AAP97068.1	AAP97068.1;OON61457.1;WP_229288966.1;WP_143958644.1;PWT45101.1;WP_229278447.1;WP_265486318.1;WP_260241387.1;WP_257496519.1;WP_252413657.1;WP_229408579.1;WP_229407462.1;WP_229305320.1;WP_229284818.1;WP_153704763.1;WP_229281907.1;WP_229271462.1;WP_152703897.1;WP_229269117.1;WP_228341541.1;WP_169478101.1;WP_169471892.1;WP_168240700.1;WP_163622265.1;WP_153707045.1;WP_142490283.1;WP_042746670.1;WP_065…	AAP97068.1 putative transport protein, partial [Limosilactobacillus reuteri subsp. reuteri];OON61457.1 MFS transporter [Limosilactobacillus reuteri];WP_229288966.1 MFS transporter [Limosilactobacillus reuteri];WP_143958644.1 MFS transporter [Limosilactobac	211	1	1	1	9.7	12.271	238690	298200	268445	588310	233710	411010	0.653135	0.333297
AAS48489.1	AAS48489.1;CCC03473.1;OJI10834.1;OON60166.1;OCW71411.1;OCW70460.1;OCW64868.1;AEI56946.1;AGN98587.1;AMY14444.1;AWD63143.1;CUR36679.1;OTA80882.1;CUR38969.1;OTA87852.1;OTA68274.1;CUR40768.1;EDX43015.1;EEI64536.1;KEK16340.1;KEQ21515.1;KGE72127.1;OTA81789.1;OTA76184.1;OCW62121.1;OTA42482.1;WLR79001.1;WP_003664767.1;WP_086131365.1;WP_229271231.1;VTZ92917.1;UZM90562.1;OYS96707.1;QIZ04954.1;OPG87912.1;OT…	AAS48489.1 S-ribosylhomocysteinase [Limosilactobacillus reuteri subsp. rodentium];CCC03473.1 autoinducer-2 production protein LuxS [Limosilactobacillus reuteri subsp. suis];OJI10834.1 S-ribosylhomocysteine lyase [Limosilactobacillus reuteri];OON60166.1 S-r	173	15	15	15	88	17.727	3966300	4162600	4064450	4374900	3766600	4070750	0.998452	0.996179
AAX14547.1	AAX14547.1;UFK67543.1;UXE89989.1;UYQ75682.1;WP_003666833.1;WLR80059.1;WLC96488.1;WJK30951.1;VTZ89700.1;OYS92508.1;UCN18687.1;UGQ33345.1;UUW69186.1;UPG78720.1;UNL40133.1;UNL37559.1;UIT54597.1;UIN26581.1;OYS97819.1;TGB09498.1;OTA86099.1;TGY48897.1;sp|B2G6Q9.1|RS15_LIMRJ;sp|Q50EJ9.1|RS15_LIMRT;UCN16916.1;UAW63145.1;UAW60901.1;TSB18563.1;TGY64496.1;QQR14949.1;QWS04875.1;QPB65990.1;UFK66187.1;sp|A5VJ8…	AAX14547.1 ribosomal protein s15p/s13e [Limosilactobacillus reuteri];UFK67543.1 30S ribosomal protein S15 [Limosilactobacillus reuteri];UXE89989.1 30S ribosomal protein S15 [Limosilactobacillus reuteri];UYQ75682.1 30S ribosomal protein S15 [Limosilactobaci	158	5	5	5	58.4	10.416	20514000	17406000	18960000	15039000	20670000	17854500	1.06192	0.868722
WP_003664110.1	WP_003664110.1;UNL41479.1;UIN26105.1;UHC30650.1;UFK64722.1;WP_003668489.1;WP_086142140.1;WP_065867356.1;UAW61899.1;WP_085678869.1;WP_113897502.1;WP_229412030.1;WP_229308794.1;WP_229284648.1;WP_152745428.1;WP_143958540.1;WP_142490451.1;UGQ32055.1;PTV04622.1;UIT55079.1;UPG79266.1;OTA44898.1;UUW67797.1;OFB59504.1;OCX46960.1;OCW69574.1;OCW64742.1;VTZ92715.1;UZM90927.1;PTM29655.1;PUH35653.1;PTS30772.1…	WP_003664110.1 transcriptional regulator NrdR [Limosilactobacillus reuteri];UNL41479.1 transcriptional repressor NrdR [Limosilactobacillus reuteri];UIN26105.1 transcriptional regulator NrdR [Limosilactobacillus reuteri];UHC30650.1 transcriptional regulator	176	4	4	4	33.5	18.122	579900	511570	545735	380870	298400	339635	1.60683	0.463332
WP_152699593.1	WP_152699593.1;OCW68449.1;OTA44143.1;OTA50449.1;OTA51474.1;OTA56119.1;OTA60911.1;OTA71554.1;OTA72222.1;OTA75722.1;OTA43348.1;OCW62915.1;UFK66140.1;OTA79809.1;OCW64418.1;OAV47062.1;ABQ82867.1;AGN99519.1;AGR64030.1;AKP00841.1;AMY13496.1;ANU51066.1;BAG25096.1;CCC03092.1;CUR36335.1;AEI58052.1;OTA42881.1;OPG88816.1;CUR43077.1;WP_003666776.1;AAX82602.1;UIN26631.1;UIT54547.1;UNL37518.1;UNL40180.1;UPG786…	WP_152699593.1 NUDIX hydrolase [Limosilactobacillus reuteri];OCW68449.1 ADP-ribose pyrophosphatase [Limosilactobacillus reuteri];OTA44143.1 ADP-ribose pyrophosphatase [Limosilactobacillus reuteri];OTA50449.1 ADP-ribose pyrophosphatase [Limosilactobacillus	182	7	7	7	55.4	20.955	1443600	1793300	1618450	1805500	2058300	1931900	0.83775	0.59124
WP_260241428.1	WP_260241428.1;OTA43643.1;WP_261296323.1;WP_168240183.1;WP_134988633.1;WP_134907644.1;WP_102816876.1;WP_085719943.1;WP_085650276.1;WP_019252170.1;WP_065867342.1;PWT61793.1;UCN17173.1;TGY49300.1;TGB12734.1;ROV62230.1;RNF37693.1;PWT62277.1;WP_035151748.1;WP_078009109.1;OCW66680.1;OON66276.1;KEK15195.1;OTA59392.1;KEQ21225.1;OCW70301.1;OCW67809.1;OCW65071.1;WP_306038212.1;OCW62544.1;OAV46479.1;KRK496…	WP_260241428.1 hypothetical protein [Limosilactobacillus reuteri];OTA43643.1 hypothetical protein BHL85_01410 [Limosilactobacillus reuteri];WP_261296323.1 hypothetical protein [Limosilactobacillus reuteri];WP_168240183.1 hypothetical protein [Limosilactoba	175	7	7	7	39.6	20.567	1207300	1174300	1190800	806910	633340	720125	1.6536	0.222673
QID05029.1	QID05029.1;WP_142499127.1;UYQ74429.1;WJK31601.1;TGB12242.1;UZM90916.1;WP_229271718.1;WP_182586892.1;WP_152697949.1;WP_134989261.1;VTZ92743.1;WP_065867239.1;TGY48048.1;WP_065533125.1;WP_035153065.1;WP_019251382.1;WP_003675767.1;WP_003670844.1;UUW67806.1;TGY64117.1;UAW59622.1;UAW61908.1;UIN26095.1;TSB21051.1;WP_229274231.1;UXE88572.1;UPG79275.1;UNL41470.1;UNL36336.1;UIT55089.1;UHC30659.1;OYT03863.1…	QID05029.1 hypothetical protein Lreu23DRAFT_4111, partial [Limosilactobacillus reuteri];WP_142499127.1 PepSY domain-containing protein [Limosilactobacillus reuteri];UYQ74429.1 PepSY domain-containing protein [Limosilactobacillus reuteri];WJK31601.1 PepSY d	154	1	1	1	22.1	8.6095	398250	441570	419910	301480	297550	299515	1.40197	0.628968
OYT03010.1	OYT03010.1;OON65229.1;QLQ61123.1;WP_229307131.1;OTA53540.1;OTA46408.1;RMX25681.1;TGB11423.1;OFB59672.1;OJI11108.1;TSB18971.1;KGE71763.1;TGY62426.1;QPB67289.1;OCX47693.1;ROV61793.1;RNF36496.1;RMX27132.1;KRK50220.1;CCC04132.1;OPG89453.1;OTA46701.1;QIZ05270.1;QDR73558.1;AWD63521.1;PWT63794.1;ANU52532.1;AMY15034.1;AKP02157.1;AGO00099.1;ABQ84174.1;OCW70057.1;OCW64929.1;UFK65458.1;QLL77150.1;AEI57359.1…	OYT03010.1 hypothetical protein CBG27_10490 [Limosilactobacillus reuteri];OON65229.1 hypothetical protein B1A73_04590 [Limosilactobacillus reuteri];QLQ61123.1 membrane protein insertase YidC [Limosilactobacillus reuteri];WP_229307131.1 membrane protein ins	174	2	2	2	8	30.883	556960	736170	646565	666040	238340	452190	1.42985	0.603545
QQR14284.1	QQR14284.1;WP_267493713.1;WP_019251241.1;WP_220477823.1;WP_267493371.1;WP_267493780.1;QDK48038.1;WP_267866695.1;KGE70351.1;BAG25875.1;CCC03345.1;OTA42986.1;WP_003668767.1;ABQ83694.1;AGN98735.1;AKP01660.1;WP_003672670.1;WP_181388477.1;WP_153706946.1;WP_153706733.1;OYS60778.1;UPG79453.1;OYS72899.1;CUR44121.1;OYS68618.1;OYS66766.1;OYS64033.1;OYS59407.1;WP_152738481.1;OYS58122.1;OYS56661.1;WJK31828.1…	QQR14284.1 glycoside hydrolase family 73 protein [Limosilactobacillus reuteri];WP_267493713.1 glycoside hydrolase family 73 protein [Limosilactobacillus reuteri];WP_019251241.1 glycoside hydrolase family 73 protein [Limosilactobacillus reuteri];WP_22047782	196	4	4	2	25.7	25.89	981850	876980	929415	591880	393500	492690	1.88641	0.119921
AAY86799.1	AAY86799.1;UIN25821.1;UGQ32256.1;OXE60498.1;WP_003672683.1;WP_063164402.1;WP_085719861.1;WP_078009226.1;WP_261296138.1;WP_229308786.1;WP_035157153.1;WP_229284919.1;WP_229281479.1;WP_229271871.1;WP_134906604.1;WP_102815794.1;WP_094501172.1;WP_086141653.1;UFK67746.1;UHC30851.1;UIT55362.1;PTS15786.1;UNL36476.1;OYT05900.1;OYS46853.1;PIN31254.1;UYQ74627.1;UXE88802.1;UUW68043.1;WP_003664539.1;WLR79155.…	AAY86799.1 lr0469 [Limosilactobacillus reuteri];UIN25821.1 preprotein translocase subunit SecY [Limosilactobacillus reuteri];UGQ32256.1 preprotein translocase subunit SecY [Limosilactobacillus reuteri];OXE60498.1 preprotein translocase subunit SecY [Limosi	172	8	8	8	15.8	47.802	2437500	2316100	2376800	2767200	2131700	2449450	0.97034	0.884431
PTM27028.1	PTM27028.1;VTZ93288.1;UYQ75910.1;UXE88271.1;UUW69509.1;UNL39841.1;UHC30414.1;UGQ33631.1;WP_066035266.1;WP_102816022.1;UFK66534.1;WP_109897675.1;WP_153706737.1;WP_229397969.1;WP_229304100.1;WP_181462454.1;WP_169476659.1;WP_169470797.1;WP_153705052.1;UZM89429.1;WJK31249.1;UFK67204.1;WLR79761.1;OCW67142.1;OCW63767.1;OCW62601.1;UNL36147.1;OAV46794.1;KRK47975.1;WP_003674080.1;KGE70240.1;OYS99897.1;OYT…	PTM27028.1 HlyC/CorC family transporter [Limosilactobacillus reuteri];VTZ93288.1 Magnesium and cobalt efflux protein CorC [Limosilactobacillus reuteri];UYQ75910.1 hemolysin family protein [Limosilactobacillus reuteri];UXE88271.1 hemolysin family protein [L	177	12	12	12	37.5	52.092	879880	747380	813630	731940	708820	720380	1.12945	0.804154
AAY86803.1	AAY86803.1;UYQ74676.1;UNL41204.1;WP_003664618.1;WLR79092.1;WLC95435.1;WJK31901.1;VTZ88426.1;UZM90637.1;WP_217324430.1;BAG25938.1;WP_229269107.1;WP_261296148.1;UNL36519.1;UPG79516.1;WP_003674922.1;PWT59524.1;PWT32534.1;PWT30720.1;WP_003668822.1;WP_094502646.1;WP_094560731.1;OON64887.1;OJI10907.1;OFB58239.1;OCX47241.1;OAV47246.1;KRK51992.1;OYT06276.1;OYS52023.1;WP_065533244.1;UXE88862.1;WP_18259013…	AAY86803.1 lr0524 [Limosilactobacillus reuteri];UYQ74676.1 amino acid ABC transporter permease [Limosilactobacillus reuteri];UNL41204.1 amino acid ABC transporter permease [Limosilactobacillus reuteri];WP_003664618.1 amino acid ABC transporter permease [Li	171	2	2	2	16.5	23.543	276990	368470	322730	252290	318870	285580	1.13009	0.930109
OTA49624.1	OTA49624.1;AMY14705.1;PWT32142.1;EGC14158.1;KEK16344.1;OJI11301.1;KEQ20678.1;KGE70170.1;OAV47482.1;ANU51651.1;AKP01524.1;PWT62825.1;PWT31271.1;AGR64520.1;AGN98864.1;WP_216578409.1;OPG88198.1;OTA44650.1;RMX24662.1;OTA45233.1;EEI10206.1;EDX42657.1;AWD62770.1;CUU12231.1;OTA85027.1;OYS46245.1;PWT68623.1;OYS50876.1;QBE45961.1;PWT40641.1;PWT40548.1;PWT34366.1;QDK48200.1;OTA62519.1;PUH33616.1;OTA51420.1…	OTA49624.1 peptidase M23 [Limosilactobacillus reuteri];AMY14705.1 peptidase M23 [Limosilactobacillus reuteri];PWT32142.1 LysM domain-containing protein [Limosilactobacillus reuteri];EGC14158.1 LysM domain protein [Limosilactobacillus reuteri MM4-1A];KEK163	194	6	2	0	36.6	24.931	273140	136680	204910	315050	381680	348365	0.588205	0.242033
WP_181388817.1	WP_181388817.1;RMX25236.1;KGE72336.1;OCW62166.1;OCW64495.1;OCW66816.1;TGY48604.1;OCW67674.1;OCW69487.1;OCX49811.1;OYS67196.1;PWT37957.1;OYS72194.1;TGY63731.1;PWT63151.1;PWT69375.1;QDK49006.1;PWT52463.1;QDR72984.1;QIZ03933.1;QPB65868.1;KEQ19849.1;KEK16783.1;KEK13706.1;AXX73800.1;WP_152742964.1;QBE47066.1;CUR43052.1;OAV47433.1;AGR63952.1;AGN99601.1;AEI57961.1;AWD61988.1;BAG25026.1;EGC15724.1;CCC042…	WP_181388817.1 ribonuclease Y [Limosilactobacillus reuteri];RMX25236.1 ribonuclease Y [Limosilactobacillus reuteri];KGE72336.1 ribonuclease [Limosilactobacillus reuteri];OCW62166.1 ribonuclease Y [Limosilactobacillus reuteri];OCW64495.1 ribonuclease Y [Lim	187	21	21	21	50.6	57.184	2770500	2618400	2694450	3227400	3003300	3115350	0.864895	0.651246
WP_302500086.1	WP_302500086.1;WP_251939356.1;WP_132140110.1;WP_122481130.1;WP_229305071.1;WP_229285347.1;WP_219285260.1;WP_204758788.1;WP_135950920.1;WP_134988812.1;WP_134906936.1;WP_113896570.1;WP_042746210.1;WP_019254065.1;WP_099979769.1;WP_094502561.1;WP_087214649.1;WP_085719464.1;WP_085678191.1;WP_085649565.1;WP_072575075.1;UCN18696.1;UCN16925.1;WP_003671213.1;VTZ89680.1;UZM89654.1;UYQ75672.1;UXE89979.1;WP_…	WP_302500086.1 FtsW/RodA/SpoVE family cell cycle protein [Limosilactobacillus reuteri];WP_251939356.1 FtsW/RodA/SpoVE family cell cycle protein [Limosilactobacillus reuteri];WP_132140110.1 FtsW/RodA/SpoVE family cell cycle protein [Limosilactobacillus reut	176	1	1	1	3.9	44.446	310170	272060	291115	266380	212380	239380	1.21612	0.824077
UUW68942.1	UUW68942.1;WP_003666472.1;WP_229277093.1;WP_223659569.1;WP_163622102.1;WP_134907061.1;WP_102816613.1;WP_035155145.1;WP_035151770.1;WP_152743024.1;VTZ88597.1;PWT68737.1;UZM89868.1;UYQ75457.1;PWT32263.1;UPG78490.1;WP_229285679.1;WP_260235234.1;WJK30700.1;WP_003667504.1;WP_019253917.1;UNL37280.1;PWT30075.1;OCW70282.1;OCW65052.1;OTA45767.1;OTA47589.1;OTA47857.1;OTA48742.1;OTA59411.1;OTA64470.1;OUN487…	UUW68942.1 LysM peptidoglycan-binding domain-containing protein [Limosilactobacillus reuteri];WP_003666472.1 LysM domain-containing protein [Limosilactobacillus reuteri];WP_229277093.1 LysM domain-containing protein [Limosilactobacillus reuteri];WP_2236595	188	7	7	6	40.4	21.074	3570900	1936900	2753900	2551200	2105900	2328550	1.18267	0.714879
WP_267493971.1	WP_267493971.1;PWT40262.1;WP_172468227.1;WP_094502223.1;WP_163622344.1;WP_251672267.1;WP_229407356.1;WP_229280441.1;WP_229269416.1;WP_219284918.1;WP_169471218.1;WP_134988985.1;WP_162216461.1;WP_098035494.1;WP_153706108.1;WP_152709937.1;WP_152700214.1;WP_139561274.1;WP_135950703.1;WP_086878992.1;WP_086118343.1;UUW69495.1;WP_004562298.1;WP_003674112.1;PWT43640.1;WP_085719445.1;WP_035157397.1;WP_035…	WP_267493971.1 signal peptidase II [Limosilactobacillus reuteri];PWT40262.1 signal peptidase II [Limosilactobacillus reuteri];WP_172468227.1 signal peptidase II [Limosilactobacillus reuteri];WP_094502223.1 signal peptidase II [Limosilactobacillus reuteri];	163	1	1	1	8.9	16.302	75464	41284	58374	74033	129620	101826	0.573269	0.2226
AAY86842.1	AAY86842.1;EDX42611.1;OTA46200.1;AEI56494.1;AGN98906.1;AGR64479.1;AMY14743.1;ANU51609.1;CCC04001.1;CUR37207.1;CUR38271.1;CUR41493.1;CUR41765.1;CUU12270.1;EEI66180.1;PUH35634.1;KEK14442.1;KEQ20718.1;KGE70595.1;OCW63830.1;OCW64618.1;OCW65423.1;OCW70518.1;OCW71223.1;OCX47289.1;OJI11340.1;OON65333.1;OPG88229.1;OTA49844.1;PIN30861.1;OTA62482.1;OYT01640.1;UIT55101.1;WP_152717794.1;OTA71399.1;OTA76713.1…	AAY86842.1 lr1005 [Limosilactobacillus reuteri];EDX42611.1 penicillin-binding protein, 1A family [Limosilactobacillus reuteri subsp. rodentium];OTA46200.1 penicillin-binding protein [Limosilactobacillus reuteri];AEI56494.1 penicillin-binding protein, 1A fa	233	22	22	22	47.6	81.235	1445400	1288000	1366700	1104500	1012900	1058700	1.29092	0.556196
OTA48807.1	OTA48807.1;EEI64684.1;OJI10754.1;AEI57088.1;OTA74182.1;CCC03553.1;CUR43954.1;CUU11882.1;PTM28584.1;AAY86849.1;OON64938.1;OTA69692.1;OTA47913.1;OTA52307.1;OTA53732.1;OTA46726.1;OTA81283.1;AMY14365.1;OTA86808.1;UIT53673.1;QLQ61728.1;OTA90472.1;OUN42389.1;OUP84535.1;PTM24477.1;QLL76826.1;OTA84395.1;VTZ89811.1;WP_003669961.1;UIN25557.1;WP_229289339.1;WP_228342338.1;WP_182589997.1;WP_229276429.1;QBE46…	OTA48807.1 hypothetical protein BHL85_12600 [Limosilactobacillus reuteri];EEI64684.1 hypothetical protein HMPREF0534_1994 [Limosilactobacillus reuteri CF48-3A];OJI10754.1 hypothetical protein BJI45_09270 [Limosilactobacillus reuteri];AEI57088.1 hypothetica	100	5	5	5	35.2	14.342	1019200	983490	1001345	1268300	1046700	1157500	0.865093	0.651685
AAY86851.1	AAY86851.1;OTA76542.1;WP_229278931.1;WP_228341872.1;WP_169478346.1;WP_162216307.1;WP_153702714.1;WP_094536948.1;PWT37810.1;WP_142499368.1;WP_065532652.1;PWT44516.1;QPB65707.1;QIZ03795.1;QDR73147.1;ROV63435.1;RNF37727.1;WP_229307576.1;WP_102816419.1;WP_306038243.1;OAV47392.1;OTA69779.1;OTA59358.1;OTA57326.1;KEQ21191.1;KRK50313.1;OTA47282.1;OTA45432.1;PWT35488.1;OJI10158.1;OCX48391.1;OCW71101.1;OCW…	AAY86851.1 lr1068 [Limosilactobacillus reuteri];OTA76542.1 preprotein translocase subunit SecA [Limosilactobacillus reuteri];WP_229278931.1 preprotein translocase subunit SecA [Limosilactobacillus reuteri];WP_228341872.1 preprotein translocase subunit SecA	176	41	41	1	56.8	90.351	11579000	9871600	10725300	15874000	13527000	14700500	0.729587	0.313971
AAY86866.1	AAY86866.1;WP_152742682.1;WP_262866166.1;WP_229409214.1;WP_229398426.1;WP_229272076.1;WP_228341351.1;WP_223659917.1;WP_168240409.1;WP_152704219.1;QBE45550.1;WP_152701419.1;TGY64311.1;UHC30457.1;UGQ33588.1;UFK67251.1;UFK66486.1;UCN18512.1;QIZ04340.1;QDK48620.1;OYS45043.1;OCW65632.1;OUP88400.1;OUN47482.1;OUL54286.1;OTA87454.1;OTA84965.1;OTA77884.1;OTA59466.1;OCW63716.1;OCW69556.1;OTA50264.1;OTA4836…	AAY86866.1 lr1246 [Limosilactobacillus reuteri];WP_152742682.1 SPFH domain-containing protein [Limosilactobacillus reuteri];WP_262866166.1 SPFH domain-containing protein [Limosilactobacillus reuteri];WP_229409214.1 SPFH domain-containing protein [Limosilac	197	14	14	14	60.4	31.8	2403100	2419200	2411150	2111600	2595900	2353750	1.02439	0.999315
AAY86867.1	AAY86867.1;OTA71477.1;OTA44396.1;AGN99578.1;AMY13553.1;CCC04217.1;CUR37105.1;CUR43029.1;CUU12897.1;EEI65897.1;OTA47162.1;UFK68807.1;OTA48801.1;OTA49320.1;OTA51081.1;OTA54258.1;OTA64495.1;OTA66297.1;OPG88884.1;OJI09953.1;OTA71108.1;PUH36169.1;PTM27740.1;PUH35981.1;OTA87136.1;OTA88632.1;OTA88898.1;OUN49327.1;OUP89484.1;PIN31104.1;PTM23615.1;OTA77005.1;UFK66081.1;OTA76815.1;QDK48983.1;QIZ03956.1;QKT…	AAY86867.1 lr1256 [Limosilactobacillus reuteri];OTA71477.1 chemotaxis protein [Limosilactobacillus reuteri];OTA44396.1 chemotaxis protein [Limosilactobacillus reuteri];AGN99578.1 methyl-accepting chemotaxis family protein [Limosilactobacillus reuteri I5007	176	4	4	4	45.2	16.603	3199100	3701600	3450350	3079500	5716100	4397800	0.784563	0.439887
WLC96383.1	WLC96383.1;WP_019252897.1;OCW69357.1;OCW67650.1;RMX25173.1;PIN31105.1;WP_302500096.1;WP_283581114.1;TGY63707.1;WP_003676029.1;OCW62142.1;WP_003671902.1;WP_003667651.1;WP_003666702.1;WJK30847.1;VTZ88787.1;UZM89744.1;UYQ75583.1;OCX46685.1;OFB59801.1;OJI09952.1;OON66413.1;OCW64471.1;OTA79082.1;OTA77004.1;OTA76816.1;OTA71478.1;OTA71109.1;OTA66296.1;OTA64494.1;OTA54259.1;OTA51082.1;OTA49319.1;OTA48802…	WLC96383.1 hypothetical protein LDE72_03080 [Limosilactobacillus reuteri];WP_019252897.1 hypothetical protein [Limosilactobacillus reuteri];OCW69357.1 hypothetical protein BBP14_04520 [Limosilactobacillus reuteri];OCW67650.1 hypothetical protein BBP13_0061	200	6	6	6	29.4	16.611	7364100	8989500	8176800	7930300	7483800	7707050	1.06095	0.870589
AAY86874.1	AAY86874.1;OTA66343.1;OTA73096.1;OTA45958.1;OTA73911.1;OTA78024.1;OTA79724.1;OTA85258.1;OTA88281.1;OTA91255.1;OUN48449.1;OUP88670.1;OTA76329.1;OTA42660.1;OPG88127.1;OTA52400.1;OYS49759.1;OON65568.1;AGN98796.1;AMY14637.1;ANU51720.1;AXX74840.1;CCC03299.1;CUR37824.1;CUR39000.1;OTA66384.1;OTA60150.1;AGR64565.1;OTA49273.1;WP_241545459.1;WLR79231.1;QQR14318.1;RNF36896.1;TGY46550.1;TGY64148.1;UCN18013.1…	AAY86874.1 unknown extracellular protein lr1393 [Limosilactobacillus reuteri];OTA66343.1 DUF4828 domain-containing protein [Limosilactobacillus reuteri];OTA73096.1 DUF4828 domain-containing protein [Limosilactobacillus reuteri];OTA45958.1 DUF4828 domain-co	166	4	4	2	60.8	13.645	545650	580610	563130	569770	549790	559780	1.00598	0.960773
AAY86877.1	AAY86877.1;UFK66403.1;OJI09753.1;ROV63364.1;TGB11716.1;OON66702.1;TGY48469.1;TGY59153.1;TSB20737.1;OTA47701.1;OTA43779.1;UFK67327.1;WP_003668108.1;OTA42574.1;OPG88670.1;OTA57119.1;WP_003670892.1;WP_003674243.1;OTA57022.1;UNL40028.1;OCX50086.1;VTZ89043.1;KEK15952.1;OAV47663.1;ABQ83025.1;WP_311317659.1;WP_181462580.1;QIZ04213.1;PTS27613.1;WP_229268678.1;WP_225437175.1;AMY13298.1;EDX41671.1;CUU12691…	AAY86877.1 unknown extracellular protein lr1434 [Limosilactobacillus reuteri];UFK66403.1 hypothetical protein IU404_01850 [Limosilactobacillus reuteri];OJI09753.1 peptidoglycan-binding protein LysM [Limosilactobacillus reuteri];ROV63364.1 LysM domain-conta	195	3	3	3	13	22.351	194310	181930	188120	188960	214270	201615	0.933065	0.78107
AGR64918.1	AGR64918.1;EGC14763.1;EEI09023.1;CUU11661.1;CUR43466.1;CUR41299.1;CUR37984.1;CCC03754.1;BAG26299.1;AXX74386.1;ANU52169.1;AKP02118.1;AGN98336.1;WP_020843447.1;OCW68254.1;AEI57323.1;ABQ84138.1;OCW63389.1;OCW64569.1;EEI66401.1;KGE71801.1;UFK65414.1;KRK47553.1;UCN17607.1;UAW62503.1;UAW60221.1;TSB18780.1;TGY48143.1;TGB10595.1;ROV62716.1;RNF36527.1;RMX26205.1;QWS04173.1;QQR13877.1;QPB67206.1;OUN48410.1…	AGR64918.1 hypothetical protein N134_10055 [Limosilactobacillus reuteri TD1];EGC14763.1 hypothetical protein HMPREF0536_11900 [Limosilactobacillus reuteri MM4-1A];EEI09023.1 hypothetical protein HMPREF0535_1192 [Limosilactobacillus reuteri MM2-3];CUU11661.	232	12	12	12	61.3	35.907	3210700	2924500	3067600	2483300	2241300	2362300	1.29856	0.546148
AAY86911.1	AAY86911.1;OTA76442.1;AEI57578.1;CUR41270.1;AGR63657.1;AMY13936.1;ANU52389.1;AXX74150.1;OON65981.1;CCC03165.1;OXE59880.1;AGN99976.1;CUR43564.1;CUU13285.1;EEI65336.1;KGE72506.1;CUR36876.1;OTA77930.1;OUP88888.1;CUR38254.1;OTA74651.1;WP_229288918.1;WP_229272355.1;OTA48810.1;OTA50855.1;OTA55920.1;OTA60541.1;OTA71858.1;OTA44683.1;OTA72355.1;OPG89257.1;OCX47432.1;OTA85136.1;OTA86412.1;OUL55548.1;OUN487…	AAY86911.1 lr1809 [Limosilactobacillus reuteri];OTA76442.1 ABC transporter substrate-binding protein [Limosilactobacillus reuteri];AEI57578.1 NLPA lipoprotein [Limosilactobacillus reuteri SD2112];CUR41270.1 Methionine ABC transporter substrate-binding prot	145	13	13	5	52.3	31.945	2196900	2398800	2297850	2069100	2570400	2319750	0.990559	0.927988
OTA44000.1	OTA44000.1;OTA51336.1;EEI66453.1;PUH33371.1;OJI10594.1;OTA43049.1;OTA43829.1;OUP88550.1;OTA48830.1;OTA51299.1;OTA54380.1;OTA63922.1;OTA59018.1;OTA73724.1;OPG87714.1;OTA71496.1;PWT65775.1;OUN47890.1;QDK47749.1;WP_152738775.1;CUU11719.1;CUR43727.1;CUR37741.1;CCC03703.1;PWT30977.1;PWT32477.1;PWT34711.1;PWT37739.1;PWT40411.1;PWT41585.1;PWT44056.1;PWT54138.1;PWT58029.1;PIN29683.1;PWT58894.1;OTA76581.1…	OTA44000.1 hypothetical protein BHL89_09150 [Limosilactobacillus reuteri];OTA51336.1 hypothetical protein BHL90_04125 [Limosilactobacillus reuteri];EEI66453.1 hypothetical protein HMPREF0534_0224 [Limosilactobacillus reuteri CF48-3A];PUH33371.1 hypothetica	189	9	9	3	49.5	23.541	2589300	2469400	2529350	2215000	1615600	1915300	1.3206	0.518004
CUR42336.1	CUR42336.1;UAW60165.1;WP_253940168.1;ROV61648.1;WP_285142653.1;WP_283581243.1;TGB10268.1;WP_229394016.1;UNL36798.1;KEK15018.1;UIT53836.1;UIN25398.1;UZM90380.1;UYQ74954.1;UXE89205.1;UUW68414.1;OAV46923.1;OCW65450.1;OCW66015.1;OCW68098.1;OCW69626.1;OCX46990.1;OJI10600.1;OON61898.1;OPG87733.1;KEK14102.1;ABQ84083.1;OTA49762.1;OTA51211.1;OTA51580.1;OTA55924.1;OTA60517.1;KRK50827.1;UPG77994.1;UNL40877.…	CUR42336.1 ErfK/YbiS/YcfS/YnhG family protein [Limosilactobacillus reuteri];UAW60165.1 L,D-transpeptidase [Limosilactobacillus reuteri];WP_253940168.1 L,D-transpeptidase [Limosilactobacillus reuteri];ROV61648.1 L,D-transpeptidase [Limosilactobacillus reute	176	3	3	3	23.3	18.124	329220	352500	340860	283090	220170	251630	1.35461	0.674382
PTV01404.1	PTV01404.1;UCN19593.1;EEI64535.1;KEQ21516.1;OON60167.1;OTA55931.1;OUN41107.1;OUP83749.1;QLL76702.1;WP_086143355.1;RMX25380.1;UFK65132.1;UFK67878.1;UIT53555.1;UZM90561.1;WLR79000.1;WP_003671515.1;WP_035150889.1;UCN17827.1;CUR36680.1;AEI56947.1;WP_087216252.1;WP_180874824.1;WP_152727222.1;WP_152743210.1;WP_152744885.1;WP_153703678.1;WP_162216232.1;WP_169473648.1;WP_169478094.1;WP_226061973.1;WP_229…	PTV01404.1 peptidase M10 [Limosilactobacillus reuteri];UCN19593.1 matrixin family metalloprotease [Limosilactobacillus reuteri];EEI64535.1 Matrixin [Limosilactobacillus reuteri CF48-3A];KEQ21516.1 peptidase M10 [Limosilactobacillus reuteri];OON60167.1 pept	206	4	4	4	26.8	26.026	113080	122240	117660	37540	39567	38553.5	3.05186	0.0561149
KRK49604.1	KRK49604.1;CUR36272.1;OCW62540.1;OAV46483.1;KGE72992.1;OCW65075.1;KEQ21221.1;KEK15199.1;KEK14733.1;OTA48765.1;PWT61796.1;EDX41937.1;CUU13060.1;CUR42896.1;CUR42245.1;CUR38369.1;OTA47612.1;WP_191990804.1;EEI09887.1;AWD61831.1;EGC15584.1;EEI65007.1;OTA47524.1;AGN99749.1;ABQ82661.1;AGR63847.1;AKP00626.1;AEI57821.1;OCW70305.1;PWT63550.1;OCW66676.1;OTA43647.1;OCX49657.1;OFB60059.1;OJI10128.1;OON66272.1…	KRK49604.1 hypothetical protein FC53_GL000777 [Limosilactobacillus reuteri subsp. reuteri];CUR36272.1 Preprotein translocase subunit SecG (TC 3.A.5.1.1) [Limosilactobacillus reuteri];OCW62540.1 preprotein translocase subunit SecG [Limosilactobacillus reute	157	1	1	1	32.8	6.2082	974950	1130800	1052875	1410400	1280200	1345300	0.782632	0.472466
QBE46614.1	QBE46614.1;PUH35821.1;ABB02538.1;QKT14437.1;EEI09012.1;QIZ03511.1;QDK47659.1;PWT61874.1;PWT50713.1;PWT46189.1;PWT36368.1;PWT30646.1;PUH36050.1;UGQ32770.1;UNL40732.1;PTS30545.1;CCC03805.1;WP_229277318.1;TSB19946.1;WP_229273907.1;WP_016496380.1;WP_225441126.1;QLQ61486.1;OTA87723.1;OTA79035.1;OTA75027.1;WP_229411931.1;EEI66339.1;OTA69870.1;WP_080564814.1;UAW62595.1;UNL36966.1;OUN47083.1;OPG89371.1;R…	QBE46614.1 HAMP domain-containing histidine kinase [Limosilactobacillus reuteri];PUH35821.1 sensor histidine kinase [Limosilactobacillus reuteri];ABB02538.1 signal transduction histidine kinase [Limosilactobacillus reuteri];QKT14437.1 HAMP domain-containin	156	5	5	5	13.1	47.56	330730	302890	316810	185750	125490	155620	2.03579	0.243033
UNL37785.1	UNL37785.1;PUH35107.1;UPG77936.1;WP_229276995.1;WP_229272981.1;WP_261296204.1;WP_260241037.1;WP_229408571.1;WP_229303994.1;WP_229284113.1;WP_229278854.1;WP_229268121.1;WP_124216216.1;WP_122481045.1;WP_229267455.1;WP_153705916.1;WP_153702783.1;WP_153701399.1;WP_142499025.1;WP_109884283.1;WP_086131879.1;UZM90435.1;WP_080564811.1;PWT30546.1;WP_019252962.1;WP_019251977.1;WP_086131369.1;WP_085678558.1…	UNL37785.1 response regulator transcription factor, partial [Limosilactobacillus reuteri];PUH35107.1 DNA-binding response regulator [Limosilactobacillus reuteri];UPG77936.1 response regulator transcription factor [Limosilactobacillus reuteri];WP_229276995.	162	1	1	1	21.1	11.051	6318.8	17447	11882.9	11468	23242	17355	0.684696	0.380887
ABB02543.1	ABB02543.1;OYT01809.1;OUN40294.1;KEK14405.1;AGR64444.1;ANU51572.1;CUR38721.1;CUR41439.1;EDX42567.1;EEI66132.1;KEK16856.1;OON65712.1;KEQ20757.1;OCW61856.1;OCW65495.1;OCW66093.1;OCW68164.1;OCW68565.1;OCX46944.1;OYS59667.1;OUP82058.1;OYS75025.1;OYS52140.1;PUH35669.1;UIT55062.1;OXE60698.1;OYS46033.1;OYS46576.1;OYS47960.1;OYS51158.1;OYS54181.1;OYS72359.1;OYS61063.1;OYS76318.1;OYS64177.1;OYS64679.1;OYS…	ABB02543.1 response regulator [Limosilactobacillus reuteri];OYT01809.1 DNA-binding response regulator [Limosilactobacillus reuteri];OUN40294.1 DNA-binding response regulator [Limosilactobacillus reuteri];KEK14405.1 PhoB family transcriptional regulator [Li	159	15	15	15	70.2	26.33	8230800	8601800	8416300	6599800	5984900	6292350	1.33754	0.443521
ABB02545.1	ABB02545.1;OCW69169.1;UGQ32769.1;UFK68267.1;UCN19326.1;UAW60323.1;UCN17560.1;UFK65526.1;OUL55776.1;PWT36369.1;OCX47682.1;OCW71291.1;OCW65338.1;CUR39821.1;OCW64699.1;OCW64158.1;OAV46447.1;KRK50379.1;KGE73122.1;EGC14868.1;EEI66338.1;EEI09011.1;CUU11607.1;CUR42949.1;UHC31366.1;UIN25276.1;UIT53958.1;UNL40733.1;WP_273774821.1;WP_229283517.1;WP_229273144.1;WP_216578339.1;WP_169471873.1;WP_152719135.1;W…	ABB02545.1 response regulator [Limosilactobacillus reuteri];OCW69169.1 two-component system response regulator [Limosilactobacillus reuteri];UGQ32769.1 response regulator transcription factor [Limosilactobacillus reuteri];UFK68267.1 Response regulator MprA	137	3	3	3	29	24.922	152810	163730	158270	76099	89896	82997.5	1.90692	0.294878
ABB02552.1	ABB02552.1;TGB09497.1;sp|A5VJ88.1|RS20_LIMRD;UAW63144.1;UPG78719.1;OYT04411.1;UUW69185.1;RNF37438.1;WP_229280855.1;WLR80060.1;WLC96487.1;WJK30950.1;VTZ89698.1;UZM89643.1;UYQ75681.1;UXE89988.1;ROV63870.1;sp|B2G6Q8.1|RS20_LIMRJ;TGY48896.1;PWT45610.1;TGY64495.1;OYS81634.1;OYS58993.1;WP_003666832.1;UNL40134.1;UIT54596.1;UIN26582.1;UHC31943.1;UGQ33344.1;UFK67544.1;UFK66186.1;UCN18688.1;UNL37558.1;RMX2…	ABB02552.1 ribosomal protein S20 [Limosilactobacillus reuteri];TGB09497.1 30S ribosomal protein S20 [Limosilactobacillus reuteri];sp|A5VJ88.1|RS20_LIMRD RecName: Full=Small ribosomal subunit protein bS20; AltName: Full=30S ribosomal protein S20;UAW63144.1	159	5	5	5	36.9	9.2436	25426000	24367000	24896500	30216000	25458000	27837000	0.894367	0.726724
ABB02557.1	ABB02557.1;PWT40676.1;UAW60796.1;TSB20636.1;TGY63716.1;UFK68799.1;UZM89754.1;OYT04813.1;VTZ88796.1;ROV63685.1;WP_182589804.1;WP_152742960.1;WP_003666692.1;WLR80171.1;WLC96374.1;TGB12874.1;UGQ33238.1;UAW63040.1;UCN17029.1;UCN18800.1;UPG78614.1;KRK51469.1;KGE72321.1;OYS79894.1;OYS59303.1;UYQ75573.1;UUW69076.1;UNL40237.1;UFK66073.1;UNL37442.1;UIT54474.1;UIN26702.1;UHC31836.1;UXE89872.1;RNF37540.1;PW…	ABB02557.1 thioredoxin domain-containing protein [Limosilactobacillus reuteri];PWT40676.1 thioredoxin [Limosilactobacillus reuteri];UAW60796.1 thioredoxin [Limosilactobacillus reuteri];TSB20636.1 thioredoxin [Limosilactobacillus reuteri];TGY63716.1 thiored	159	11	11	11	67.3	11.889	64478000	78403000	71440500	65143000	64220000	64681500	1.1045	0.788955
WP_204758805.1	WP_204758805.1;WLC96293.1;UCN17111.1;UAW62958.1;UAW60715.1;TSB19068.1;TGY57521.1;UYQ75490.1;WJK30760.1;WP_251672333.1;RNF37621.1;WP_223659589.1;WP_109913674.1;WP_003667548.1;WP_003666540.1;WLR80266.1;TGY47899.1;ROV62957.1;UCN18881.1;UFK65982.1;UFK68714.1;UGQ33155.1;OCW62238.1;OAV47840.1;OYS61956.1;KGE73055.1;VTZ89913.1;OYT05817.1;TGB12784.1;UXE89786.1;UUW68990.1;UPG78530.1;UNL40321.1;UNL37320.1;U…	WP_204758805.1 thymidine kinase [Limosilactobacillus reuteri];WLC96293.1 thymidine kinase [Limosilactobacillus reuteri];UCN17111.1 thymidine kinase [Limosilactobacillus reuteri];UAW62958.1 thymidine kinase [Limosilactobacillus reuteri];UAW60715.1 thymidine	165	9	9	9	54	21.673	569230	488190	528710	622810	658940	640875	0.824981	0.563273
WP_003673205.1	WP_003673205.1;sp|B2G6K0.1|MRAZ_LIMRJ;WP_094508622.1;ROV63809.1;UNL37502.1;UNL40196.1;UPG78658.1;WP_019254292.1;WP_218046836.1;WP_168240236.1;sp|A5VJ27.1|MRAZ_LIMRD;UHC31882.1;WP_094502531.1;WP_065532769.1;WP_003666752.1;UUW69123.1;WLR80122.1;WLC96425.1;WJK30890.1;VTZ89964.1;TGB10773.1;TGY64435.1;OCW62900.1;UIT54531.1;KRK52179.1;UGQ33283.1;KGE72185.1;KEQ20656.1;OYS92568.1;OYT06986.1;OYS97879.1;RM…	WP_003673205.1 division/cell wall cluster transcriptional repressor MraZ [Limosilactobacillus reuteri];sp|B2G6K0.1|MRAZ_LIMRJ RecName: Full=Transcriptional regulator MraZ;WP_094508622.1 division/cell wall cluster transcriptional repressor MraZ [Limosilacto	174	3	3	3	20.7	16.001	102830	79086	90958	94980	73499	84239.5	1.07975	0.996704
ABB02578.1	ABB02578.1;VTZ89555.1;UHC31530.1;UGQ32933.1;WP_152726606.1;WP_003665599.1;WLR80505.1;WLC96063.1;WJK30506.1;UYQ75273.1;UCN19114.1;UFK65742.1;UXE89551.1;UUW68741.1;UPG78310.1;UNL40561.1;UIT54145.1;UIN25091.1;UFK68478.1;OTA76736.1;OTA80978.1;TGY63765.1;TGY45847.1;TGB10160.1;sp|B2G5K8.1|RL31B_LIMRJ;UCN17346.1;UAW62755.1;UAW60499.1;TSB19560.1;sp|A5VI29.1|RL31B_LIMRD;QWS04437.1;QLQ61382.1;QPB65578.1;QL…	ABB02578.1 ribosomal protein L31 [Limosilactobacillus reuteri];VTZ89555.1 50S ribosomal protein L31 type B [Limosilactobacillus reuteri];UHC31530.1 type B 50S ribosomal protein L31 [Limosilactobacillus reuteri];UGQ32933.1 type B 50S ribosomal protein L31 [	156	11	11	11	95.1	9.123	57878000	56879000	57378500	63899000	53867000	58883000	0.974449	0.942105
CUR43911.1	CUR43911.1;CUU11837.1;CCC03597.1;AEI57134.1;OTA86849.1;OJI10711.1;OTA44836.1;OTA69945.1;OTA84226.1;QLQ62558.1;UIN25514.1;UIT53716.1;VTZ88158.1;WP_003669909.1;EEI64717.1;ABD13946.1;WP_152726942.1;WP_063164350.1;QLL76869.1;PTM29387.1;PTM27334.1;OUN49449.1;OTA80709.1;AMY14322.1;OTA44314.1;OTA51634.1;OTA61780.1;OTA73681.1;WP_085680282.1;WP_273781198.1;OTA80114.1;OUP89371.1;OTA74454.1;OYT05955.1;TGB11…	CUR43911.1 Cob(I)alamin adenosyltransferase PduO [Limosilactobacillus reuteri];CUU11837.1 ATP:cob(I)alamin adenosyltransferase [Limosilactobacillus reuteri subsp. suis];CCC03597.1 propanediol utilization protein PduO [Limosilactobacillus reuteri subsp. sui	94	14	14	14	65.1	22.859	8425200	7583400	8004300	5185900	5257700	5221800	1.53286	0.262187
WP_228341553.1	WP_228341553.1;PWT35579.1;PTS30565.1;PWT48913.1;QBE46359.1;QQR14035.1;QLQ62888.1;WP_003669907.1;WP_003669182.1;UXE89105.1;UNL40974.1;PTS16858.1;UNL36708.1;UIT53717.1;QLL76870.1;UIN25513.1;UGQ32514.1;UAW60060.1;TGB11972.1;RMX27769.1;PWT31576.1;QWS04013.1;UPG77889.1;PWT65044.1;BAG26142.1;CUR39217.1;CUR43910.1;CUU11836.1;OFB57303.1;OAV46817.1;ABD13947.1;PWT67053.1;PWT64077.1;PWT38095.1;PWT60774.1;PW…	WP_228341553.1 EutN/CcmL family microcompartment protein [Limosilactobacillus reuteri];PWT35579.1 ethanolamine utilization protein EutN [Limosilactobacillus reuteri];PTS30565.1 ethanolamine utilization protein EutN [Limosilactobacillus reuteri];PWT48913.1	87	7	7	7	77.8	9.763	6176200	6462700	6319450	4332400	4305800	4319100	1.46314	0.317311
ABD13949.1	ABD13949.1;PTM29390.1;AEI57137.1;AMY14319.1;CCC03600.1;CUR43908.1;CUU11834.1;EEI64714.1;OJI10708.1;OTA44317.1;OTA44833.1;OTA51637.1;OTA61783.1;OTA73678.1;OTA74451.1;OTA80117.1;OTA80706.1;OTA84223.1;OTA86852.1;OUN49452.1;QLQ62560.1;PTM27337.1;QLL76872.1;UIN25511.1;UIT53719.1;VTZ88161.1;WP_003669904.1;OUP89374.1;UAW60062.1;OYT08910.1;WP_135350200.1;WP_003669186.1;UPG77891.1;UHC31111.1;UGQ32516.1;TG…	ABD13949.1 propanediol utilization protein [Limosilactobacillus reuteri];PTM29390.1 phosphate propanoyltransferase [Limosilactobacillus reuteri];AEI57137.1 propanediol utilization protein PduL [Limosilactobacillus reuteri SD2112];AMY14319.1 propanediol uti	91	21	21	21	78.5	23.93	38048000	38479000	38263500	25764000	24490000	25127000	1.5228	0.269553
ABD13950.1	ABD13950.1;OTA74450.1;OTA75880.1;OTA86853.1;OTA51638.1;OTA44832.1;OTA44318.1;OJI10707.1;CUR43907.1;CCC03601.1;CUU11833.1;AMY14318.1;AEI57138.1;OTA73677.1;EEI64713.1;OTA61784.1;PTM29391.1;PTM27338.1;OTA80118.1;VTZ88162.1;UIT53720.1;UIN25510.1;QLQ62561.1;QLL76873.1;OUP89375.1;OUN49453.1;OTA84222.1;WP_003669902.1;OTA80705.1;WP_269147526.1;OYS89985.1;OYT08909.1;OYT05951.1;OYS99706.1;OYS80295.1;WP_019…	ABD13950.1 propanediol utilization protein [Limosilactobacillus reuteri];OTA74450.1 ethanolamine utilization protein EutM [Limosilactobacillus reuteri];OTA75880.1 ethanolamine utilization protein EutM [Limosilactobacillus reuteri];OTA86853.1 ethanolamine u	92	10	10	8	92.6	9.6619	92443000	99408000	95925500	53919000	64315000	59117000	1.62264	0.204274
ABD13955.1	ABD13955.1;EEI64708.1;OTA86858.1;OTA84217.1;AEI57143.1;AMY14313.1;CCC03606.1;CUR43902.1;CUU11828.1;OJI10702.1;OTA80123.1;OTA44323.1;OTA44827.1;OTA51643.1;OTA61789.1;OTA73672.1;OTA74445.1;UIN25505.1;OUP89380.1;OTA80700.1;QLL76878.1;QLQ62566.1;WP_003669893.1;OUN49458.1;PTM27343.1;PTM29396.1;VTZ88167.1;UIT53725.1;WP_229287707.1;OTA79968.1;WP_086141511.1;WP_169471903.1;UHC31116.1;WP_153702800.1;WP_10…	ABD13955.1 propanediol dehydratase medium subunit [Limosilactobacillus reuteri];EEI64708.1 dehydratase medium subunit [Limosilactobacillus reuteri CF48-3A];OTA86858.1 propanediol dehydratase [Limosilactobacillus reuteri];OTA84217.1 propanediol dehydratase	79	25	25	13	87.3	25.874	69387000	77100000	73243500	45272000	52112000	48692000	1.50422	0.283669
PTS30575.1	PTS30575.1;TGB11963.1;VTZ88169.1;UPG77898.1;UNL40964.1;UIT53727.1;UIN25503.1;PWT41234.1;UGQ32523.1;RMX27779.1;PWT42956.1;OTA80698.1;OYS78168.1;OTA51645.1;OTA44825.1;OTA44325.1;OJI10700.1;PWT67063.1;WP_003669200.1;QQR14026.1;KRK52069.1;PWT44685.1;PWT65034.1;PWT64086.1;PWT60784.1;PWT59837.1;PWT55065.1;PWT53564.1;PWT48922.1;PWT69583.1;QPB67056.1;PWT35589.1;sp|A5VMB3.1|PDUB_LIMRD;UHC31118.1;UAW60069.…	PTS30575.1 propanediol utilization microcompartment protein PduB [Limosilactobacillus reuteri];TGB11963.1 propanediol utilization microcompartment protein PduB [Limosilactobacillus reuteri];VTZ88169.1 Propanediol utilization protein PduB [Limosilactobacill	95	14	14	14	89.5	24.945	95477000	89089000	92283000	69255000	60580000	64917500	1.42154	0.355026
ABD13958.1	ABD13958.1;EEI64705.1;OUN49461.1;OTA80126.1;CUR43899.1;OTA61792.1;OTA51646.1;OTA44824.1;OTA44326.1;CUU11825.1;OTA86861.1;AMY14310.1;AEI57146.1;OTA73669.1;WP_003669890.1;OTA74442.1;OUP89383.1;VTZ88170.1;UIT53728.1;UIN25502.1;PTM27346.1;QLL76881.1;PTM29399.1;QLQ62569.1;OTA84214.1;CCC03609.1;OTA80697.1;OJI10699.1;UNL36717.1;UHC31119.1;UGQ32524.1;OYS89993.1;UNL40963.1;UPG77899.1;UXE89115.1;WP_0036692…	ABD13958.1 propanediol utilization protein [Limosilactobacillus reuteri];EEI64705.1 BMC domain protein [Limosilactobacillus reuteri CF48-3A];OUN49461.1 ethanolamine utilization protein EutM [Limosilactobacillus reuteri];OTA80126.1 ethanolamine utilization	86	7	7	2	79.3	9.5219	67229000	61281000	64255000	35187000	29720000	32453500	1.97991	0.0738199
WP_229286565.1	WP_229286565.1;OTA73668.1;QLQ62570.1;QLL76882.1;OTA61793.1;PTM29400.1;OTA51647.1;OTA74441.1;OTA44327.1;OTA86862.1;EEI64704.1;VTZ88171.1;OUN49462.1;OJI10698.1;OTA80696.1;CUU11824.1;CUR43898.1;CCC03610.1;AMY14309.1;AEI57147.1;OUP89384.1;OTA80127.1;UIT53729.1;PTM27347.1;ABD13959.1;WP_229308855.1;WP_152720397.1;WP_229398521.1;WP_003669888.1;WP_229409690.1;UIN25501.1;WP_086142677.1;OTA84213.1;OTA44823…	WP_229286565.1 AraC family transcriptional regulator [Limosilactobacillus reuteri];OTA73668.1 AraC family transcriptional regulator [Limosilactobacillus reuteri];QLQ62570.1 AraC family transcriptional regulator [Limosilactobacillus reuteri];QLL76882.1 AraC	112	12	12	12	40.5	41.983	1707600	1653700	1680650	1031900	870740	951320	1.76665	0.165147
ABD13960.1	ABD13960.1;AEI57148.1;AMY14308.1;PTM29401.1;UIN25500.1;CCC03611.1;CUR43897.1;CUU11823.1;EEI64703.1;OJI10697.1;OON61469.1;OTA44328.1;OTA44822.1;OTA51648.1;OTA61794.1;OTA73667.1;OTA74440.1;OTA80128.1;VTZ88172.1;OTA80695.1;OTA84212.1;WP_003669887.1;UIT53730.1;OTA86863.1;OUN49463.1;OUP89385.1;PTM27348.1;QLL76883.1;QLQ62571.1;WP_086132353.1;OTA77943.1;OTA51502.1;WP_086141120.1;WP_229308856.1;WP_152701…	ABD13960.1 ethanolamine utilization protein [Limosilactobacillus reuteri];AEI57148.1 ethanolamine utilization protein EutJ family protein [Limosilactobacillus reuteri SD2112];AMY14308.1 ethanolamine utilization protein EutJ [Limosilactobacillus reuteri];PT	104	7	7	7	30	30.367	1618800	1440100	1529450	833740	878200	855970	1.7868	0.156521
TGY61269.1	TGY61269.1;OTA45606.1;OTA48709.1;OTA57806.1;OTA59905.1;OJI11743.1;OJI10878.1;OPG87957.1;OTA73178.1;OTA84818.1;OUN50209.1;OUP90604.1;OXE60422.1;OYS45774.1;OYS50649.1;OTA76420.1;OTA83411.1;OTA83776.1;OYS54758.1;OCW69485.1;AEI56886.1;AGN98627.1;AKP01754.1;AMY14476.1;ANU51845.1;BAG25968.1;CCC03439.1;OTA45702.1;OTA43559.1;ABQ83787.1;TGB11122.1;WJK31943.1;VTZ88999.1;WP_170090916.1;WP_169472461.1;WP_162…	TGY61269.1 sucrose phosphorylase [Limosilactobacillus reuteri];OTA45606.1 sucrose phosphorylase [Limosilactobacillus reuteri];OTA48709.1 sucrose phosphorylase [Limosilactobacillus reuteri];OTA57806.1 sucrose phosphorylase [Limosilactobacillus reuteri];OTA5	178	16	16	1	40.8	55.969	2274400	2620600	2447500	2010000	2001900	2005950	1.22012	0.656494
UIT53955.1	UIT53955.1;OCW71294.1;OYS47201.1;OYS48069.1;OTA46709.1;OTA46955.1;OTA45697.1;OPG89368.1;OJI10514.1;AGN98274.1;AMY14111.1;ANU52277.1;CUR39824.1;CUR40592.1;CUR42951.1;CUU11605.1;OYS51290.1;OTA85966.1;EDX43399.1;KEQ20872.1;OCW64161.1;OCW64696.1;OCW65335.1;OYS47090.1;WLR80680.1;OUP88439.1;QLQ61483.1;WP_003670263.1;UNL36962.1;WLC95885.1;WJK30343.1;VTZ88112.1;UXE89377.1;UUW68580.1;ABF06645.1;OYS98465.1…	UIT53955.1 beta-phosphoglucomutase [Limosilactobacillus reuteri];OCW71294.1 beta-phosphoglucomutase [Limosilactobacillus reuteri];OYS47201.1 beta-phosphoglucomutase [Limosilactobacillus reuteri];OYS48069.1 beta-phosphoglucomutase [Limosilactobacillus reute	173	24	24	24	95	23.98	47424000	49450000	48437000	34124000	39387000	36755500	1.31782	0.466882
ABF06647.1	ABF06647.1;WP_085680761.1;OUP87991.1;PUH33111.1;PTM28574.1;PTM24487.1;PIN29739.1;OON64929.1;OUN41744.1;EEI64669.1;AEI57074.1;PUH33504.1;QIZ05023.1;QLL76816.1;WLC95600.1;WP_229396709.1;WP_099979998.1;WP_087216153.1;QLQ61056.1;WP_003669977.1;UIT53661.1;UIN25569.1;UFK68004.1;UFK65257.1;ACZ53579.1;ACZ53571.1;ACZ53580.1;ACZ53572.1;ACZ53574.1;ACZ53575.1;ADK08378.1;ACZ53530.1;ACZ53601.1;ACZ53558.1;ACZ53…	ABF06647.1 xylulose-5-phosphate phosphoketolase [Limosilactobacillus reuteri];WP_085680761.1 MULTISPECIES: phosphoketolase family protein [Limosilactobacillus];OUP87991.1 phosphoketolase [Limosilactobacillus reuteri];PUH33111.1 phosphoketolase family prote	61	47	7	7	55.8	91.435	579420	702190	640805	377300	425210	401255	1.597	0.470222
ABF06651.2	ABF06651.2;OYS72605.1;WP_019251628.1;WP_003671054.1;WP_003665875.1;WLR79891.1;WLC96626.1;WJK31116.1;VTZ89053.1;OTA71192.1;UUW69320.1;PUH35012.1;PTS27603.1;QKT15514.1;PWT52382.1;QDK48746.1;UXE90155.1;UZM89560.1;UYQ75776.1;PTS14806.1;OYS75749.1;PTM28627.1;OCX50096.1;OFB57918.1;OJI09765.1;OON66631.1;OTA42584.1;KGE70036.1;OTA43789.1;OAV47653.1;OTA48578.1;OTA55007.1;OTA57002.1;QBE47291.1;PWT68520.1;PW…	ABF06651.2 pyruvate kinase [Limosilactobacillus reuteri];OYS72605.1 pyruvate kinase [Limosilactobacillus reuteri];WP_019251628.1 pyruvate kinase [Limosilactobacillus reuteri];WP_003671054.1 MULTISPECIES: pyruvate kinase [Limosilactobacillus];WP_003665875.1	164	45	45	2	91.3	51.853	183910000	212150000	198030000	242740000	218640000	230690000	0.858425	0.62987
PTS28665.1	PTS28665.1;PWT40421.1;UCN19408.1;UPG78008.1;UNL40861.1;UIT53852.1;UIN25382.1;UGQ32632.1;UFK68121.1;WP_003669358.1;WP_086141707.1;WP_169473118.1;WP_169478193.1;WP_251672346.1;WP_229284067.1;UFK65377.1;UCN17643.1;UUW68430.1;UYQ74968.1;UHC31228.1;OYT01404.1;OCW62695.1;OCW61970.1;OCW61636.1;OAV46938.1;KRK50810.1;KEK15002.1;VTZ89131.1;UZM90363.1;PTM27408.1;UXE89225.1;WP_003665087.1;WLR78811.1;WLC95776…	PTS28665.1 alcohol dehydrogenase [Limosilactobacillus reuteri];PWT40421.1 alcohol dehydrogenase [Limosilactobacillus reuteri];UCN19408.1 zinc-dependent alcohol dehydrogenase family protein [Limosilactobacillus reuteri];UPG78008.1 zinc-dependent alcohol deh	161	17	17	1	74.7	35.918	46737000	48859000	47798000	33433000	32530000	32981500	1.44924	0.329494
ABF06655.2	ABF06655.2;OCW71679.1;RNF37699.1;ROV63405.1;QPB65734.1;TGY49294.1;WLC96222.1;WLR80335.1;WJK30674.1;PWT66916.1;WP_003666443.1;OYT05753.1;PUH33403.1;OCW68590.1;OCX48420.1;UYQ75432.1;OJI10131.1;OON66269.1;OPG88988.1;CUR39722.1;OTA43650.1;OTA47309.1;OTA47527.1;OTA48768.1;OTA56151.1;OTA56752.1;OTA59385.1;OCW63168.1;QKT15837.1;RMX24809.1;OCW61384.1;UXE89709.1;UAW62897.1;RMX25367.1;UCN17181.1;UFK65907.1…	ABF06655.2 enolase [Limosilactobacillus reuteri];OCW71679.1 phosphopyruvate hydratase [Limosilactobacillus reuteri];RNF37699.1 phosphopyruvate hydratase [Limosilactobacillus reuteri];ROV63405.1 phosphopyruvate hydratase [Limosilactobacillus reuteri];QPB657	157	33	33	33	82.7	48.039	228500000	277400000	252950000	320280000	381730000	351005000	0.720645	0.29522
UIN25089.1	UIN25089.1;AMY13897.1;OYS88986.1;OYS93017.1;OYS93807.1;OYS98539.1;OYS99458.1;OYT00344.1;OYT02109.1;OTA75610.1;WP_218046472.1;OTA74813.1;OTA69905.1;AEI57623.1;AGN99933.1;AWD61630.1;OTA47920.1;CCC03206.1;CUR36570.1;CUR43424.1;CUU13244.1;EDX43581.1;EEI65385.1;KEK14215.1;KEQ20248.1;OJI10290.1;OON65943.1;OPG89182.1;OTA44348.1;OTA46828.1;OYS87869.1;OYS86481.1;OYS75587.1;OYS74279.1;WP_229277394.1;ABF150…	UIN25089.1 PTS transporter subunit EIIC [Limosilactobacillus reuteri];AMY13897.1 PTS cellobiose transporter subunit IIC [Limosilactobacillus reuteri];OYS88986.1 PTS cellobiose transporter subunit IIC [Limosilactobacillus reuteri];OYS93017.1 PTS cellobiose	215	2	2	2	9.1	32.407	88444	68393	78418.5	31076	52404	41740	1.87874	0.307651
ABI26296.1	ABI26296.1;WP_065533485.1;PUH34345.1;QLL75103.1;PWT32844.1;UYQ75057.1;WP_153701427.1;WP_134906904.1;WP_094508404.1;WP_086120105.1;WP_085680870.1;WP_072575213.1;WP_035152021.1;WP_109913797.1;WP_004562487.1;WP_003670210.1;WP_003669492.1;WP_003665236.1;WLR78748.1;WLC95835.1;WJK30279.1;WP_153707597.1;WP_086132393.1;WP_169473431.1;PWT30164.1;OAV46397.1;OCW62647.1;OCW64899.1;AKP00233.1;AGR63517.1;AGN98…	ABI26296.1 single-stranded DNA-binding protein [Limosilactobacillus reuteri];WP_065533485.1 single-stranded DNA-binding protein [Limosilactobacillus reuteri];PUH34345.1 single-stranded DNA-binding protein [Limosilactobacillus reuteri];QLL75103.1 single-str	220	8	8	8	38.5	20.605	2166700	1943800	2055250	2047200	2157500	2102350	0.977596	0.900133
ABI26324.1	ABI26324.1;OTA58284.1;OTA84054.1;OYS95213.1;OYS70300.1;OYS92709.1;OYS91892.1;WP_152697471.1;OYS87525.1;OYS85149.1;OYS81819.1;OYS81062.1;OYS74941.1;OYS72991.1;OYS72275.1;OYS70706.1;OYS68709.1;OTA75946.1;AEI56878.1;AMY14483.1;OJI10883.1;OTA48618.1;OTA48183.1;OTA47775.1;OTA45677.1;OPG87972.1;OTA82678.1;EEI66063.1;ANU51840.1;EDX42941.1;CUU12017.1;CUR42803.1;CUR36957.1;CCC03433.1;AWD63067.1;OTA86223.1…	ABI26324.1 conserved hypothetical protein [Limosilactobacillus reuteri];OTA58284.1 hypothetical protein BHL92_01075 [Limosilactobacillus reuteri];OTA84054.1 hypothetical protein BHL84_02125 [Limosilactobacillus reuteri];OYS95213.1 hypothetical protein CBG1	233	7	7	7	19.4	53.455	64157	93952	79054.5	60035	49641	54838	1.4416	0.59312
AEI57202.1	AEI57202.1;UXE89165.1;WLC95713.1;WJK30136.1;VTZ88234.1;PWT43389.1;WP_219285359.1;WP_229280985.1;UUW68368.1;WP_229285096.1;WP_283578126.1;OPG87757.1;WP_273774408.1;WP_229307778.1;WP_229307018.1;UYQ74909.1;UZM90421.1;PWT69975.1;UPG77950.1;QLQ62852.1;WLR78871.1;WP_003665002.1;WP_003675261.1;WP_011953588.1;OJI10644.1;OFB57761.1;OCX47028.1;PTM26899.1;OYS69090.1;WP_065867870.1;WP_229274615.1;WP_1636223…	AEI57202.1 DNA-3-methyladenine glycosylase [Limosilactobacillus reuteri SD2112];UXE89165.1 DNA-3-methyladenine glycosylase [Limosilactobacillus reuteri];WLC95713.1 DNA-3-methyladenine glycosylase [Limosilactobacillus reuteri];WJK30136.1 DNA-3-methyladenine	185	4	4	4	32	24.938	98201	114200	106200	132910	175670	154290	0.688317	0.386455
ABI26332.1	ABI26332.1;WP_229408908.1;WP_085649641.1;WP_066035768.1;WP_153707205.1;WP_169470703.1;WP_257525257.1;WP_169473478.1;WP_229411887.1;WP_260235285.1;WP_257496926.1;WP_228342110.1;WP_204759021.1;WP_035155551.1;WP_229394135.1;WP_229392816.1;WP_229305256.1;WP_229286669.1;WP_229284568.1;WP_229283370.1;WP_229282478.1;WP_229268954.1;WP_219285440.1;PWT56832.1;WP_094501113.1;WP_094504710.1;WP_094509853.1;WP…	ABI26332.1 phosphoglycerate mutase [Limosilactobacillus reuteri];WP_229408908.1 histidine phosphatase family protein [Limosilactobacillus reuteri];WP_085649641.1 histidine phosphatase family protein [Limosilactobacillus reuteri];WP_066035768.1 histidine ph	211	4	4	4	15.6	24.692	629970	446990	538480	486890	266220	376555	1.43002	0.603398
WP_231124808.1	WP_231124808.1;UXE89509.1;OCW62840.1;OCW65234.1;OCW66652.1;OCW71358.1;KEQ21377.1;OTA46638.1;OJI10332.1;OTA48812.1;BAG24698.1;OTA44685.1;OON65983.1;KEK16270.1;KEK14254.1;AEI57576.1;AGR63655.1;AMY13938.1;OTA48135.1;OAV47168.1;KRK51620.1;KGE72508.1;UYQ75230.1;UHC31488.1;UFK68437.1;UFK65700.1;ABQ82461.1;QBE46734.1;ANU52387.1;OCW69086.1;WLC96023.1;EGC15810.1;UZM90096.1;WP_003665503.1;WLR80547.1;UIT541…	WP_231124808.1 methionine ABC transporter permease [Limosilactobacillus reuteri];UXE89509.1 ABC transporter permease [Limosilactobacillus reuteri];OCW62840.1 methionine ABC transporter permease [Limosilactobacillus reuteri];OCW65234.1 methionine ABC transp	175	2	2	2	9.9	22.876	146480	171850	159165	131330	137880	134605	1.18246	0.86437
ABI26355.1	ABI26355.1;OTA86809.1;WP_182589999.1;WP_086120196.1;WP_003669958.1;VTZ88117.1;UIT53677.1;UIN25553.1;QLQ62519.1;QLL76830.1;PTM29347.1;PTM27294.1;OUP89331.1;OUN49409.1;OTA79620.1;OTA73853.1;OTA73028.1;OTA60093.1;OTA51268.1;OTA44274.1;OJI10751.1;EEI64758.1;CUU11878.1;CUR43952.1;CCC03556.1;AMY14362.1;AEI57093.1;OTA80748.1;WP_229308845.1;WP_152697236.1;WP_225360164.1	ABI26355.1 NaMN:DMB phosphoribosyltransferase [Limosilactobacillus reuteri];OTA86809.1 nicotinate-nucleotide--dimethylbenzimidazole phosphoribosyltransferase [Limosilactobacillus reuteri];WP_182589999.1 nicotinate-nucleotide--dimethylbenzimidazole phosphor	31	4	4	4	24.9	37.24	369770	399290	384530	379940	590890	485415	0.792168	0.552244
ABI26356.1	ABI26356.1;AMY14361.1;UIN25552.1;CCC03557.1;QLQ62520.1;UIT53678.1;CUR43951.1;WP_003669957.1;CUU11877.1;EEI64757.1;OJI10750.1;OTA44275.1;OTA51269.1;OTA60094.1;OTA73029.1;OTA73854.1;OTA79621.1;OTA80747.1;VTZ88118.1;OTA86810.1;OUN49410.1;OUP89332.1;PTM27295.1;WP_170090606.1;WP_003675119.1;PTM29348.1;QLL76831.1;AEI57094.1;WP_152738368.1;WP_086132398.1;OTA75879.1;OYS80251.1;PWT67012.1;PTS16610.1;PIN30…	ABI26356.1 uroporphyrinogen-III synthase [Limosilactobacillus reuteri];AMY14361.1 uroporphyrinogen-III synthase [Limosilactobacillus reuteri];UIN25552.1 uroporphyrinogen-III synthase [Limosilactobacillus reuteri];CCC03557.1 uroporphyrinogen-III synthase He	100	9	9	8	47.9	27.409	786100	689000	737550	566730	478600	522665	1.41113	0.41485
ABI26358.1	ABI26358.1;CUR43949.1;QLQ62522.1;UIN25550.1;UIT53680.1;VTZ88120.1;WP_003669954.1;WP_003675121.1;QLL76833.1;WP_152726933.1;WP_229397971.1;WP_273774436.1;WP_152738365.1;PTM29350.1;PTM27297.1;CCC03559.1;OTA44277.1;CUU11875.1;OTA73031.1;AEI57096.1;OTA60096.1;OUN49412.1;OTA86812.1;OTA80745.1;OTA79623.1;OTA73856.1;OTA51271.1;AMY14359.1;OUP89334.1;OJI10748.1;EEI64755.1;WP_180382880.1;CUR39256.1;CUR41912…	ABI26358.1 cobalamin-5-phosphate synthase [Limosilactobacillus reuteri];CUR43949.1 Cobalamin synthase [Limosilactobacillus reuteri];QLQ62522.1 adenosylcobinamide-GDP ribazoletransferase [Limosilactobacillus reuteri];UIN25550.1 adenosylcobinamide-GDP ribazo	37	2	2	2	9.5	28.408	43922	46859	45390.5	35825	38065	36945	1.2286	0.809534
EEI64754.1	EEI64754.1;OTA73857.1;AMY14358.1;AEI57097.1;OTA60097.1;CUU11874.1;QLQ62523.1;UIT53681.1;OJI10747.1;OTA44278.1;OTA51272.1;ABI26359.1;OTA73032.1;QLL76834.1;OTA79624.1;CUR43948.1;OTA80744.1;UIN25549.1;OTA86813.1;OTA91463.1;OUN49413.1;OUP89335.1;WP_273774435.1;WP_152720407.1;WP_003669952.1;VTZ88121.1;PTM27298.1;PTM29351.1;CCC03560.1;WP_180382879.1;WP_152726934.1;PUH34435.1;PWT69631.1;OYT10129.1;OYT08…	EEI64754.1 putative adenosylcobinamide kinase/adenosylcobinamide-phosphate guanylyltransferase [Limosilactobacillus reuteri CF48-3A];OTA73857.1 adenosylcobinamide kinase [Limosilactobacillus reuteri];AMY14358.1 adenosylcobinamide kinase [Limosilactobacillu	97	7	7	7	41.8	22.249	409970	372590	391280	374260	514170	444215	0.880835	0.697062
OTA80741.1	OTA80741.1;QLL76838.1;PTM27302.1;OUP89339.1;WP_152697235.1;UIT53685.1;VTZ88125.1;AMY14355.1;OUN49417.1;CCC03564.1;CUR43944.1;CUU11870.1;OJI10744.1;OTA44281.1;OTA51275.1;OTA60100.1;OTA73035.1;OTA73860.1;OTA79627.1;PTM29355.1;QLQ62527.1;OTA86816.1;UIN25545.1;EEI64750.1;WP_152738361.1;AEI57101.1;WP_003675129.1;ABI26363.1;WP_085721829.1;WP_152701150.1;WP_086142475.1;OTA89054.1;WLC95640.1;WP_099979802…	OTA80741.1 glutamyl-tRNA reductase [Limosilactobacillus reuteri];QLL76838.1 glutamyl-tRNA reductase [Limosilactobacillus reuteri];PTM27302.1 glutamyl-tRNA reductase [Limosilactobacillus reuteri];OUP89339.1 glutamyl-tRNA reductase [Limosilactobacillus reute	100	15	15	15	48	47.864	1268100	1006900	1137500	1284700	1239600	1262150	0.90124	0.732128
AEI57102.1	AEI57102.1;EEI64749.1;ABI26364.1;WP_225432025.1;WP_225430913.1;WP_225429473.1;WP_225357314.1;WP_225430622.1;UIT53686.1;UIN25544.1;CUU11869.1;CUR43943.1;VTZ88126.1;OTA80740.1;OUN49418.1;WP_035159600.1;WP_229287708.1;QLL77140.1;PTM29356.1;PTM27303.1;OUP89340.1;OTA86817.1;OTA44282.1;OTA79628.1;OTA73861.1;OTA73036.1;OTA60101.1;OTA51276.1;WP_063164360.1;OJI10743.1;AMY14354.1;QLQ62886.1	AEI57102.1 siroheme synthase domain protein [Limosilactobacillus reuteri SD2112];EEI64749.1 siroheme synthase domain protein [Limosilactobacillus reuteri CF48-3A];ABI26364.1 putative siroheme synthase [Limosilactobacillus reuteri];WP_225432025.1 bifunction	32	2	2	2	14.7	17.656	197700	143490	170595	186530	221670	204100	0.83584	0.623671
PTM29357.1	PTM29357.1;WP_003669946.1;ABI26365.1;WP_283578042.1;CUR43942.1;CUU11868.1;EEI64748.1;OJI10742.1;OTA44283.1;QLQ62528.1;OTA51277.1;CCC03566.1;WP_152738358.1;WP_003675130.1;VTZ88127.1;PTM27304.1;UIT53687.1;UIN25543.1;OTA73037.1;QLL76839.1;WP_180874862.1;OTA73862.1;OTA79629.1;OTA80739.1;OTA86818.1;OUN49419.1;OTA60102.1;OUP89341.1;AMY14353.1;AEI57103.1;WP_229308847.1;WP_152699619.1;WP_273774432.1;WP_1…	PTM29357.1 cobyric acid synthase [Limosilactobacillus reuteri];WP_003669946.1 MULTISPECIES: cobyric acid synthase [Limosilactobacillus];ABI26365.1 cobyric acid synthase [Limosilactobacillus reuteri];WP_283578042.1 cobyric acid synthase [Limosilactobacillus	113	17	17	17	50.9	55.223	1213500	1635700	1424600	1591200	1908100	1749650	0.81422	0.539883
ABI26366.1	ABI26366.1;OTA79630.1;WP_003669945.1;VTZ88128.1;UIT53688.1;UIN25542.1;QLQ62529.1;QLL76840.1;PTM29358.1;PTM27305.1;OUP89342.1;OUN49420.1;OTA86819.1;OTA80738.1;OTA73863.1;OTA73038.1;OTA60103.1;OTA51278.1;OTA44284.1;OJI10741.1;EEI64747.1;CUU11867.1;CUR43941.1;CCC03567.1;AMY14352.1;AEI57104.1;WP_283578043.1;WP_152701148.1;WP_182590001.1;OTA80160.1	ABI26366.1 ABC-type cobalt transport system, ATPase component [Limosilactobacillus reuteri];OTA79630.1 ABC transporter ATP-binding protein [Limosilactobacillus reuteri];WP_003669945.1 MULTISPECIES: ATP-binding cassette domain-containing protein [Limosilact	30	7	7	7	29.4	30.708	477470	428380	452925	546590	464020	505305	0.89634	0.722173
WP_172385579.1	WP_172385579.1;OTA51280.1;OTA44286.1;OJI10739.1;WP_086132339.1;EEI64745.1;CUU11865.1;CUR43939.1;OTA73865.1;CCC03569.1;AMY14350.1;AEI57106.1;OTA73040.1;OTA86821.1;OTA50035.1;OTA78873.1;OTA80736.1;OTA90733.1;OUN49422.1;OUP89344.1;PTM27307.1;PTM29360.1;WP_003669943.1;VTZ88130.1;UIT53690.1;UIN25540.1;QLQ62531.1;QLL76842.1;OTA79632.1;OTA60105.1;PWT38066.1;UXE89073.1;WP_099979807.1;CUR41926.1;PIN30297.…	WP_172385579.1 energy-coupling factor ABC transporter substrate-binding protein, partial [Limosilactobacillus reuteri];OTA51280.1 cobalt ABC transporter substrate-binding protein CbiN [Limosilactobacillus reuteri];OTA44286.1 cobalt ABC transporter substrat	59	2	2	2	33.3	5.5245	196430	182280	189355	266260	267480	266870	0.70954	0.41946
WP_086132340.1	WP_086132340.1;OUN49423.1;PTM27308.1;PTM29361.1;QLL76843.1;QLQ62532.1;VTZ88131.1;OUP89345.1;WP_107690443.1;WP_152701147.1;WP_152709432.1;WP_170090608.1;WP_172380992.1;WP_180875044.1;WP_172396883.1;WP_182590008.1;WP_171945904.1;UIT55480.1;UIN26840.1;WP_003669942.1;OTA86822.1;OTA78874.1;AEI57107.1;OTA44287.1;OTA80735.1;OTA79633.1;OTA73866.1;OTA73041.1;OTA60106.1;OTA51281.1;OTA50036.1;ABI26369.1;OTA…	WP_086132340.1 energy-coupling factor ABC transporter permease, partial [Limosilactobacillus reuteri];OUN49423.1 cobalamin biosynthesis protein CbiM [Limosilactobacillus reuteri];PTM27308.1 cobalamin biosynthesis protein CbiM [Limosilactobacillus reuteri];	41	1	1	1	4.7	23.026	220750	209310	215030	302820	243900	273360	0.786618	0.543194
OTA79634.1	OTA79634.1;OJI10737.1;UIT53691.1;VTZ88132.1;WP_003669941.1;PTM29362.1;PTM27309.1;OUP89346.1;OTA86823.1;OUN49424.1;OTA44288.1;AEI57108.1;QLL76844.1;ABI26370.1;OTA73867.1;OTA73042.1;OTA60107.1;UIN25539.1;OTA51282.1;CUU11863.1;EEI64743.1;OTA80734.1;CUR43937.1;CCC03571.1;AMY14348.1;QLQ62533.1;OTA86758.1;WP_086142517.1;OTA50037.1;WP_169471926.1;CUR39244.1;CUR41929.1;WP_102816737.1;WP_229276439.1	OTA79634.1 precorrin-2 C(20)-methyltransferase [Limosilactobacillus reuteri];OJI10737.1 precorrin-2 C(20)-methyltransferase [Limosilactobacillus reuteri];UIT53691.1 cobalt-factor II C(20)-methyltransferase [Limosilactobacillus reuteri];VTZ88132.1 Cobalt-pr	34	6	6	6	37.9	25.737	2882500	2828100	2855300	3812600	3182400	3497500	0.816383	0.54457
OJI10723.1	OJI10723.1;OUP89359.1;PTM29375.1;WP_003675157.1;VTZ88146.1;OTA73881.1;AMY14334.1;CCC03585.1;CUR43923.1;CUU11849.1;PTM27322.1;OTA44302.1;OTA44848.1;OTA51296.1;OTA60121.1;OTA73056.1;OTA79648.1;UIT53704.1;OTA80720.1;OTA84238.1;OTA86837.1;QLL76857.1;QLQ62546.1;UIN25526.1;AEI57122.1;ABI26384.1;EEI64729.1;OUN49437.1;WP_085721833.1;WP_152719140.1;WP_229308852.1;PWT44662.1;UPG77876.1;UXE89092.1;WLC95659.…	OJI10723.1 ATP:cob(I)alamin adenosyltransferase [Limosilactobacillus reuteri];OUP89359.1 ATP:cob(I)alamin adenosyltransferase [Limosilactobacillus reuteri];PTM29375.1 cob(I)yrinic acid a,c-diamide adenosyltransferase [Limosilactobacillus reuteri];WP_003675	105	7	7	7	47.3	21.773	2105700	1747100	1926400	2426500	2169900	2298200	0.838221	0.592275
EEI64727.1	EEI64727.1;OTA80718.1;AMY14332.1;AEI57124.1;OTA73691.1;CUU11847.1;UIT53706.1;WP_003669920.1;OJI10721.1;OTA44304.1;OTA44846.1;OTA51624.1;OTA74464.1;UIN25524.1;OTA80104.1;OTA84236.1;CUR43921.1;OTA86839.1;VTZ88148.1;OUN49439.1;OUP89361.1;PTM27324.1;PTM29377.1;QLL76859.1;QLQ62548.1;WP_152726940.1;WP_152701144.1;ABI26386.1;CCC03587.1;WP_086120129.1;OTA61770.1;WP_172397352.1;WP_085650127.1;WLC95660.1;P…	EEI64727.1 putative flavodoxin [Limosilactobacillus reuteri CF48-3A];OTA80718.1 flavodoxin [Limosilactobacillus reuteri];AMY14332.1 flavodoxin [Limosilactobacillus reuteri];AEI57124.1 flavodoxin [Limosilactobacillus reuteri SD2112];OTA73691.1 flavodoxin [L	105	11	11	11	70.5	16.379	8318600	6335900	7327250	8678800	11503000	10090900	0.726125	0.306647
QLL76860.1	QLL76860.1;OTA51625.1;AEI57125.1;AMY14331.1;CUR43920.1;CUU11846.1;EEI64726.1;OJI10720.1;OTA44305.1;OTA44845.1;OTA61771.1;QLQ62549.1;OTA73690.1;OTA74463.1;OTA80105.1;OTA80717.1;OTA84235.1;OTA86840.1;OUN49440.1;OUP89362.1;PTM27325.1;CCC03588.1;PTM29378.1;WP_003675162.1;WP_003669919.1;VTZ88149.1;UIT53707.1;UIN25523.1;ABI26387.1;OYT05964.1;QQR14044.1;OYT08922.1;OYT10157.1;PTS16868.1;RMX27759.1;WP_229…	QLL76860.1 EutP/PduV family microcompartment system protein [Limosilactobacillus reuteri];OTA51625.1 ethanolamine utilization protein EutP [Limosilactobacillus reuteri];AEI57125.1 ethanolamine utilization protein, EutP [Limosilactobacillus reuteri SD2112];	92	7	7	7	57	15.813	1364700	1239100	1301900	856210	735100	795655	1.63626	0.233031
WP_152701143.1	WP_152701143.1;WP_085721834.1;WP_003669917.1;VTZ88151.1;UIT53709.1;UIN25521.1;QLQ62551.1;QLL76862.1;PTM29380.1;PTM27327.1;OUP89364.1;OUN49442.1;OTA86842.1;OTA84233.1;OTA80716.1;OTA80107.1;OTA74461.1;OTA73688.1;OTA61773.1;OTA51627.1;OTA44843.1;OTA44307.1;OJI10718.1;EEI64724.1;CUU11844.1;CUR43918.1;CCC03590.1;AMY14329.1;AEI57127.1;ABI26389.1	WP_152701143.1 histidine phosphatase family protein [Limosilactobacillus reuteri];WP_085721834.1 histidine phosphatase family protein [Limosilactobacillus reuteri];WP_003669917.1 MULTISPECIES: histidine phosphatase family protein [Limosilactobacillus];VTZ8	30	1	1	1	6.2	23.951	46109	39094	42601.5	32125	23240	27682.5	1.53893	0.513001
BAG24978.1	BAG24978.1;UIN26765.1;UGQ33177.1;UYQ75512.1;WP_094536927.1;PTM29497.1;WP_102816080.1;WP_229392813.1;PTM27496.1;WP_229283051.1;WP_216577892.1;WP_169477918.1;WP_169473544.1;WP_169471094.1;WP_162216120.1;WP_134988687.1;WP_109913930.1;WP_109897773.1;UFK68738.1;UHC31774.1;UIT54409.1;OXE59586.1;UNL40298.1;OYT08493.1;OYS48101.1;UZM89816.1;WP_094504083.1;WP_065867308.1;WP_003676135.1;WP_003667564.1;WP_00…	BAG24978.1 cell division membrane protein [Limosilactobacillus reuteri subsp. reuteri JCM 1112];UIN26765.1 rod shape-determining protein RodA [Limosilactobacillus reuteri];UGQ33177.1 rod shape-determining protein RodA [Limosilactobacillus reuteri];UYQ75512	174	4	4	4	16.3	44.8	791310	653250	722280	811110	854700	832905	0.867182	0.656325
ABO32594.1	ABO32594.1;RMX27138.1;UUW69111.1;PUH33261.1;UIN26663.1;PTV00909.1;OTA81568.1;OCX46637.1;OJI09925.1;OON60189.1;OPG88835.1;OTA42637.1;OTA43038.1;OCW68463.1;OCW71490.1;OTA47622.1;OTA55162.1;OTA66193.1;OTA66322.1;OTA67643.1;OTA69736.1;OTA73385.1;OTA48395.1;OTA54386.1;OCW67494.1;OCW65607.1;OCW61339.1;UFK67610.1;UFK66113.1;AGR64002.1;UCN18764.1;QDR72879.1;WJK30878.1;WLC96411.1;WLR80134.1;WP_003672237.1…	ABO32594.1 RelA/SpoT domain protein [Limosilactobacillus reuteri];RMX27138.1 GTP pyrophosphokinase family protein [Limosilactobacillus reuteri];UUW69111.1 GTP pyrophosphokinase family protein [Limosilactobacillus reuteri];PUH33261.1 GTP pyrophosphokinase f	163	8	8	8	50.7	25.813	301780	222740	262260	261020	278260	269640	0.97263	0.843326
ABO43776.1	ABO43776.1;OTA76226.1;UAW60654.1;RNF37700.1;TGY64367.1;QWS04594.1;OCW63169.1;PUH33402.1;OCW68591.1;OJI10132.1;OON66268.1;OPG88987.1;OCW61383.1;OTA47528.1;OTA56751.1;OTA59384.1;OTA82079.1;AXX73949.1;OTA87693.1;OUL55188.1;OUN48799.1;RMX25368.1;OTA48769.1;OAV47162.1;KRK45124.1;KGE72988.1;AEI57817.1;AGR63843.1;OFB60090.1;AGN99754.1;AKP00621.1;OYS50103.1;VTZ88816.1;TSB19850.1;TGB12727.1;UZM89895.1;WP_…	ABO43776.1 triosephosphate isomerase [Limosilactobacillus reuteri];OTA76226.1 triose-phosphate isomerase [Limosilactobacillus reuteri];UAW60654.1 triose-phosphate isomerase [Limosilactobacillus reuteri];RNF37700.1 triose-phosphate isomerase [Limosilactobac	186	7	7	7	45.8	27.379	1060000	1093700	1076850	1058000	876440	967220	1.11335	0.832585
ABO43788.1	ABO43788.1;OTA49655.1;OYS75724.1;PWT49313.1;PWT64723.1;PUH36555.1;OYS78285.1;PTV02876.1;OON66140.1;OPG88043.1;OTA42535.1;OTA44574.1;OTA45211.1;OTA48961.1;OTA55776.1;PWT54181.1;OTA61735.1;OTA63476.1;OTA71641.1;OTA72423.1;OTA74363.1;OTA77376.1;OTA77757.1;OCW71588.1;OCW66508.1;OJI10955.1;OTA81057.1;OCW66406.1;UIN25820.1;UFK65000.1;AGR64610.1;UFK67747.1;WJK31844.1;WLC95384.1;WLR79154.1;WP_003664540.1…	ABO43788.1 ribosomal protein L15 [Limosilactobacillus reuteri];OTA49655.1 50S ribosomal protein L15 [Limosilactobacillus reuteri];OYS75724.1 50S ribosomal protein L15 [Limosilactobacillus reuteri];PWT49313.1 50S ribosomal protein L15 [Limosilactobacillus r	166	11	11	11	64.6	15.516	69703000	75646000	72674500	74232000	66499000	70365500	1.03281	0.925974
ABO43789.1	ABO43789.1;WJK31130.1;UHC32059.1;UIT54716.1;UIN26462.1;WP_020843076.1;WP_003666054.1;WLR79877.1;WLC96640.1;UZM89546.1;QKT15501.1;UGQ33459.1;UYQ75790.1;UXE90168.1;UUW69334.1;UPG78840.1;UNL40024.1;UNL37639.1;UFK67323.1;OTA77659.1;QWS05010.1;RMX26450.1;TSB20741.1;TGY59149.1;TGY48473.1;UFK66407.1;UCN18582.1;UCN16811.1;UAW63239.1;UAW61172.1;TGB11712.1;QLQ61902.1;QPB66108.1;QLL75962.1;ROV63355.1;RNF373…	ABO43789.1 DNA-binding protein [Limosilactobacillus reuteri];WJK31130.1 HU family DNA-binding protein [Limosilactobacillus reuteri];UHC32059.1 HU family DNA-binding protein [Limosilactobacillus reuteri];UIT54716.1 HU family DNA-binding protein [Limosilacto	156	9	9	9	75.8	9.5238	96475000	92835000	94655000	95004000	91844000	93424000	1.01318	0.965769
OTA85906.1	OTA85906.1;WP_078010049.1;WP_229271767.1;WP_169471561.1;WP_102816214.1;WP_094542331.1;WP_094537019.1;WP_094502520.1;WP_003671851.1;TGY56531.1;WP_003663667.1;WLR79720.1;WLC94957.1;WJK31288.1;PUH33139.1;ROV62432.1;WP_229283392.1;WP_229410940.1;RNF37191.1;RMX27182.1;PWT30189.1;PUH33582.1;OJI11141.1;OUN48864.1;OPG88480.1;OTA42477.1;OTA44717.1;OTA49247.1;OTA50038.1;OFB56172.1;UIN26310.1;OON61344.1;OTA…	OTA85906.1 MarR family transcriptional regulator [Limosilactobacillus reuteri];WP_078010049.1 MarR family transcriptional regulator [Limosilactobacillus reuteri];WP_229271767.1 MarR family transcriptional regulator [Limosilactobacillus reuteri];WP_16947156	165	8	8	8	56.1	17.566	3071300	3504700	3288000	5684600	6169500	5927050	0.554745	0.0585666
ABO43814.1	ABO43814.1;OTA43173.1;OTA63861.1;OTA51243.1;OCW68371.1;OTA48291.1;OTA46282.1;OTA45837.1;OPG88733.1;AWD62180.1;OON66672.1;OJI09808.1;OCX50182.1;QIZ04110.1;QPB66046.1;VTZ93515.1;OTA72978.1;OTA73810.1;OTA78732.1;OTA79271.1;OTA79497.1;OTA82321.1;OTA82952.1;OTA87449.1;OTA59318.1;OCW64660.1;OCW62974.1;OCW62499.1;ABQ82969.1;AEI58164.1;AGN99411.1;AGR64121.1;AKP00944.1;UZM89600.1;WP_169471047.1;WP_1537061…	ABO43814.1 HrcA [Limosilactobacillus reuteri];OTA43173.1 heat-inducible transcriptional repressor HrcA [Limosilactobacillus reuteri];OTA63861.1 heat-inducible transcriptional repressor HrcA [Limosilactobacillus reuteri];OTA51243.1 heat-inducible transcript	199	9	9	9	31.1	39.167	281880	205210	243545	381380	278330	329855	0.73834	0.465121
KRK50225.1	KRK50225.1;WLR78751.1;UCN17502.1;UAW62544.1;UAW60264.1;VTZ88063.1;OYT05227.1;WLC95831.1;WP_229407576.1;WP_219285650.1;UFK65463.1;WP_218046443.1;WP_182590169.1;WP_152737935.1;WP_094503736.1;WP_003670204.1;WP_003665230.1;TSB18958.1;UCN19269.1;UFK68206.1;OUL55855.1;UYQ75053.1;OCW62651.1;OYS99616.1;OYS56725.1;OYT01596.1;TGY62408.1;OYT02974.1;UZM91157.1;UXE89323.1;UGQ32715.1;UUW68525.1;UPG78090.1;UNL4…	KRK50225.1 hypothetical protein FC53_GL000463 [Limosilactobacillus reuteri subsp. reuteri];WLR78751.1 S4 domain-containing protein YaaA [Limosilactobacillus reuteri];UCN17502.1 S4 domain-containing protein YaaA [Limosilactobacillus reuteri];UAW62544.1 S4 d	166	5	5	5	71.1	8.7031	2816700	2971600	2894150	3796900	4364900	4080900	0.709194	0.272008
ABO43828.1	ABO43828.1;OTA76498.1;OFB58694.1;OJI10352.1;OON65999.1;OTA44702.1;OTA44762.1;OTA48498.1;OTA49120.1;OTA87510.1;OTA53645.1;OTA65016.1;OTA70961.1;OTA71149.1;OTA76482.1;OTA83714.1;CUR37855.1;OCW65253.1;OAV47188.1;KRK51600.1;OCW71377.1;KGE72527.1;ABQ82441.1;AGO00001.1;AKP00398.1;AMY13960.1;AWD61562.1;AXX74172.1;BAG24678.1;CCC03141.1;OCX47454.1;OCW66633.1;PWT44020.1;UIN25151.1;AEI57551.1;WP_003665466.1…	ABO43828.1 triosephosphate isomerase [Limosilactobacillus reuteri];OTA76498.1 triose-phosphate isomerase [Limosilactobacillus reuteri];OFB58694.1 triose-phosphate isomerase [Limosilactobacillus reuteri];OJI10352.1 triose-phosphate isomerase [Limosilactobac	188	10	10	10	62.5	29.214	1589100	1434100	1511600	1222800	1126400	1174600	1.28691	0.561537
WP_240843974.1	WP_240843974.1;UYQ75500.1;UFK68726.1;UFK65994.1;WLR80256.1;WLC96303.1;WJK30770.1;VTZ91229.1;UZM89828.1;UUW69000.1;UXE89796.1;WP_003666561.1;UPG78540.1;UNL40310.1;UIT54397.1;UIN26777.1;UHC31762.1;UGQ33165.1;UCN18871.1;UCN17101.1;UAW62966.1;QKT15775.1;QIZ03883.1;UAW60724.1;TSB19057.1;TGY57532.1;TGY47910.1;TGB12795.1;ROV62947.1;RMX25089.1;RMX25300.1;OYS89629.1;QWS05392.1;QQR15133.1;QPB65810.1;QLQ623…	WP_240843974.1 F0F1 ATP synthase subunit C [Limosilactobacillus reuteri];UYQ75500.1 F0F1 ATP synthase subunit C [Limosilactobacillus reuteri];UFK68726.1 ATP synthase subunit c [Limosilactobacillus reuteri];UFK65994.1 ATP synthase subunit c [Limosilactobaci	153	1	1	1	9.7	7.2176	1267300	1581.9	634441	718630	774530	746580	0.849796	0.617792
OYS56647.1	OYS56647.1;OJI11004.1;OTA66247.1;OTA65029.1;OTA55705.1;OTA54721.1;OTA47732.1;OPG89285.1;EEI65785.1;OYS66780.1;CUU12129.1;CUR43490.1;CCC03329.1;AMY14609.1;AGN98759.1;AEI56653.1;OTA68118.1;OTA69806.1;OTA72509.1;OTA75805.1;OTA76306.1;OTA80645.1;OTA81087.1;OTA82481.1;OYS46824.1;OYS48692.1;OYS99115.1;WP_003674835.1;WP_099979578.1;WP_132140228.1;WP_273781066.1;ABO43853.1;WP_152700083.1;WP_094508364.1;O…	OYS56647.1 DNA-binding protein [Limosilactobacillus reuteri];OJI11004.1 DNA-binding protein [Limosilactobacillus reuteri];OTA66247.1 DNA-binding protein [Limosilactobacillus reuteri];OTA65029.1 DNA-binding protein [Limosilactobacillus reuteri];OTA55705.1 D	127	5	5	5	28.2	20.499	788160	835310	811735	532840	426780	479810	1.69178	0.201383
ABQ01721.1	ABQ01721.1;OCW64180.1;WP_004562447.1;ROV63213.1;UIT53997.1;RNF37969.1;OYS88918.1;PWT57040.1;OTA63965.1;OTA71535.1;OTA72203.1;OTA75100.1;OTA78258.1;OTA79790.1;OTA81454.1;OTA84852.1;OTA88819.1;CCC04099.1;OUP89919.1;OYS46160.1;OYS47241.1;OYS48029.1;OYS51120.1;OYS51773.1;OYS56572.1;OYS57906.1;OTA56100.1;OTA60583.1;OTA51455.1;OTA49374.1;OTA46040.1;AGO00062.1;WP_003670332.1;WLC95927.1;VTZ88756.1;UZM901…	ABQ01721.1 Spo0J-like protein [Limosilactobacillus reuteri];OCW64180.1 chromosome partitioning protein ParB [Limosilactobacillus reuteri];WP_004562447.1 ParB/RepB/Spo0J family partition protein [Limosilactobacillus reuteri];ROV63213.1 ParB/RepB/Spo0J famil	187	13	13	13	44.2	33.337	1570100	1631800	1600950	1557500	1519000	1538250	1.04076	0.96842
ABQ01726.1	ABQ01726.1;WP_134988707.1;WP_229272733.1;WP_229271270.1;WP_229268415.1;WP_219285708.1;WP_181462714.1;WP_156296034.1;WP_153703787.1;WP_152726894.1;WP_123835338.1;WP_229281851.1;WP_102816783.1;WP_285227845.1;WP_098047011.1;WP_094504100.1;WP_086141961.1;WP_085721947.1;TGB12842.1;UGQ33206.1;WP_229278742.1;WP_229283809.1;OTA50029.1;OCW67692.1;OCW64953.1;OTA46437.1;OTA45185.1;OON66371.1;OJI09998.1;OFB5…	ABQ01726.1 cytochrome bd-type quinol oxidase subunit 2 [Limosilactobacillus reuteri];WP_134988707.1 cytochrome d ubiquinol oxidase subunit II [Limosilactobacillus reuteri];WP_229272733.1 cytochrome d ubiquinol oxidase subunit II [Limosilactobacillus reuter	197	4	4	4	10.1	37.918	1573700	1623400	1598550	1729100	2019600	1874350	0.852856	0.624558
KRK52115.1	KRK52115.1;WP_229287006.1;WP_102816514.1;WP_094501507.1;WP_094537306.1;UUW68361.1;WP_219285353.1;WP_273774414.1;WP_260245631.1;WP_260241185.1;WP_257496533.1;WP_251672241.1;WP_230212898.1;WP_229271488.1;OCW71058.1;VTZ88220.1;WP_168240709.1;WP_099979717.1;WP_153704410.1;WP_153701692.1;WP_136000678.1;WP_134989615.1;WP_124216220.1;WP_122481050.1;WP_113897165.1;WP_107721188.1;UYQ74902.1;UZM90428.1;PWT…	KRK52115.1 major facilitator transporter [Limosilactobacillus reuteri subsp. reuteri];WP_229287006.1 MFS transporter [Limosilactobacillus reuteri];WP_102816514.1 MFS transporter [Limosilactobacillus reuteri];WP_094501507.1 MFS transporter [Limosilactobacil	219	1	1	1	3	38.973	20236	18020	19128	23639	25334	24486.5	0.781165	0.53431
ABQ44374.1	ABQ44374.1;WP_229271362.1;WP_016496511.1;WP_109913650.1;WP_273781154.1;WP_273773696.1;WP_241545346.1;WP_229411612.1;WP_229409071.1;WP_229305773.1;PWT30694.1;WP_228341599.1;OYS99951.1;WP_217324488.1;WP_164960502.1;WP_153707018.1;WP_152704286.1;WP_152698193.1;WP_136000624.1;WP_134907505.1;WP_113897227.1;UUW68254.1;WP_109897635.1;WP_003670050.1;UXE89002.1;UYQ74813.1;WP_229270342.1;WP_102816872.1;WP_…	ABQ44374.1 spermidine/putrescine ABC transporter permease protein [Limosilactobacillus reuteri];WP_229271362.1 ABC transporter permease [Limosilactobacillus reuteri];WP_016496511.1 ABC transporter permease [Limosilactobacillus reuteri];WP_109913650.1 ABC t	189	2	2	2	13.2	30.156	79600	138540	109070	82844	144720	113782	0.958587	0.821391
ABQ44378.1	ABQ44378.1;VTZ92209.1;WP_152703114.1;WP_134907675.1;WP_003664204.1;WLR79347.1;WLC95195.1;WJK31634.1;PWT34451.1;OTA62500.1;UZM90881.1;QPB66625.1;QKT14950.1;QDR72192.1;QDK48219.1;QBE45939.1;WP_152726800.1;WP_153701650.1;UXE88606.1;UYQ74461.1;OTA83497.1;OUL53028.1;KEQ20699.1;KGE70616.1;KRK49699.1;OAV47505.1;OFB58478.1;OJI11322.1;OON65352.1;OPG88180.1;OTA42624.1;OTA44857.1;OTA46182.1;PWT68710.1;PWT65…	ABQ44378.1 deoxynucleoside kinase [Limosilactobacillus reuteri];VTZ92209.1 Deoxyguanosine kinase [Limosilactobacillus reuteri];WP_152703114.1 deoxynucleoside kinase [Limosilactobacillus reuteri];WP_134907675.1 deoxynucleoside kinase [Limosilactobacillus re	167	12	12	12	63.8	24.773	3237100	3184000	3210550	1702700	2322900	2012800	1.59507	0.259485
ABQ82277.1	ABQ82277.1;EGC14807.1;OTA46398.1;OTA46691.1;OTA49920.1;OTA53132.1;OTA53523.1;OTA64428.1;OTA66262.1;OAV46391.1;QPB65359.1;TSB18956.1;PWT37088.1;UCN17500.1;UGQ32713.1;OTA80901.1;OTA74886.1;OTA76056.1;EEI08950.1;AGN98210.1;OTA73824.1;CUU11539.1;RNF36493.1;ROV61785.1;sp|A5VHF3.1|DNAA_LIMRD;PWT39651.1;QBE46557.1;QDK47599.1;sp|B2G4Y5.1|DNAA_LIMRJ;OTA67012.1;QKT14381.1;AKP00226.1;AMY14049.1;BAG24517.1;C…	ABQ82277.1 chromosomal replication initiator protein DnaA [Limosilactobacillus reuteri subsp. reuteri];EGC14807.1 chromosomal replication initiator protein DnaA [Limosilactobacillus reuteri MM4-1A];OTA46398.1 chromosomal replication initiation protein DnaA	178	21	21	20	64.1	49.942	1636700	1348100	1492400	1565600	1746900	1656250	0.901072	0.731754
ABQ82281.1	ABQ82281.1;PTM30730.1;PUH34199.1;OTA46700.1;PTS16744.1;OTA46407.1;OTA80918.1;UGQ33686.1;OTA73841.1;OTA67028.1;OTA64445.1;OTA53539.1;OTA53149.1;OTA49933.1;OPG89454.1;OON65228.1;RMX27131.1;OTA66271.1;OJI11109.1;OAV46515.1;KEQ20919.2;AXX75151.1;AMY15035.1;UYQ76054.1;OTA76069.1;OTA78837.1;OFB59673.1;OTA84927.1;PTM28860.1;PIN30219.1;QPB67245.1;RNF38052.1;QIZ05271.1;PWT39656.1;QBE47399.1;QDR73497.1;PWT…	ABQ82281.1 DNA gyrase subunit B [Limosilactobacillus reuteri subsp. reuteri];PTM30730.1 DNA topoisomerase (ATP-hydrolyzing) subunit B [Limosilactobacillus reuteri];PUH34199.1 DNA topoisomerase (ATP-hydrolyzing) subunit B [Limosilactobacillus reuteri];OTA46	331	34	34	34	62.6	72.528	8816300	7786400	8301350	9978200	10227000	10102600	0.821704	0.533249
WP_003665235.1	WP_003665235.1;UXE89326.1;UFK68210.1;UFK65467.1;WLC95834.1;WJK30278.1;VTZ88059.1;UZM90224.1;UYQ75056.1;UPG78093.1;UUW68528.1;WLR78749.1;UNL40785.1;UNL36895.1;UIT53916.1;UIN25318.1;UHC31314.1;UGQ32718.1;UCN19272.1;UCN17505.1;UAW62547.1;QLQ61131.1;QLL75102.1;UAW60267.1;TSB18961.1;TGY62405.1;TGY48098.1;TGB11431.1;sp|B2G4Z1.1|RS6_LIMRJ;RNF36488.1;ROV61790.1;OYS92225.1;RMX27112.1;RMX25640.1;QWS04222.1…	WP_003665235.1 MULTISPECIES: 30S ribosomal protein S6 [Lactobacillaceae];UXE89326.1 30S ribosomal protein S6 [Limosilactobacillus reuteri];UFK68210.1 30S ribosomal protein S6 [Limosilactobacillus reuteri];UFK65467.1 30S ribosomal protein S6 [Limosilactobac	153	9	9	9	86.7	11.378	43929000	48253000	46091000	58167000	58155000	58161000	0.792473	0.459302
UXE89328.1	UXE89328.1;UYQ75058.1;UIT53918.1;UNL40783.1;WP_094560997.1;RMX27110.1;WP_025022578.1;WP_169478133.1;WP_094512129.1;WP_003665240.1;sp|B2G4Z3.1|RS18_LIMRJ;UPG78095.1;WLR78747.1;WLC95836.1;WJK30280.1;VTZ88057.1;UZM90226.1;UUW68530.1;ROV61792.1;TGB11433.1;KRK50231.1;UGQ32720.1;OYS62702.1;OYS99611.1;OYT02979.1;UCN19274.1;UAW62549.1;UIN25316.1;UHC31316.1;UFK68212.1;TGY48096.1;UFK65469.1;UCN17507.1;sp|A…	UXE89328.1 30S ribosomal protein S18 [Limosilactobacillus reuteri];UYQ75058.1 30S ribosomal protein S18 [Limosilactobacillus reuteri];UIT53918.1 30S ribosomal protein S18 [Limosilactobacillus reuteri];UNL40783.1 30S ribosomal protein S18 [Limosilactobacill	162	7	7	4	45.5	8.9974	11288000	10929000	11108500	16982000	20204000	18593000	0.597456	0.098541
ABQ82287.1	ABQ82287.1;VTZ88055.1;TGY62401.1;TGB11435.1;sp|A5VHG3.1|RL9_LIMRD;UPG78097.1;UUW68532.1;UXE89330.1;WP_229269632.1;WP_153705862.1;OTA66253.1;UYQ75060.1;WP_019251853.1;WP_003665243.1;WLR78746.1;WLC95839.1;WJK30282.1;UZM90228.1;TSB18965.1;UAW60272.1;UAW62551.1;UCN17509.1;OYS99609.1;OTA67021.1;OYT01589.1;OYT10227.1;UFK68216.1;OYT02981.1;UNL40781.1;UNL36899.1;UIT53921.1;UIN25313.1;UHC31318.1;UGQ32722.…	ABQ82287.1 LSU ribosomal protein L9P [Limosilactobacillus reuteri subsp. reuteri];VTZ88055.1 50S ribosomal protein L9 [Limosilactobacillus reuteri];TGY62401.1 50S ribosomal protein L9 [Limosilactobacillus reuteri];TGB11435.1 50S ribosomal protein L9 [Limos	162	13	13	13	64	16.692	19760000	20575000	20167500	14862000	12125000	13493500	1.49461	0.291234
PWT35066.1	PWT35066.1;WP_085649821.1;WP_065533487.1;WP_153705863.1;WP_168240079.1;WP_169471073.1;WP_229286227.1;WP_273780611.1;WP_273774263.1;WP_262865991.1;WP_261296249.1;WP_260254944.1;WP_072575216.1;OCW70053.1;WP_229305886.1;WP_229288343.1;WP_229284277.1;WP_169477777.1;WP_229281865.1;WP_229278956.1;WP_229272416.1;WP_229270529.1;WP_229269633.1;WP_228341201.1;WP_229307137.1;WP_085680864.1;WP_251672215.1;WP…	PWT35066.1 MFS transporter [Limosilactobacillus reuteri];WP_085649821.1 MFS transporter [Limosilactobacillus reuteri];WP_065533487.1 MFS transporter [Limosilactobacillus reuteri];WP_153705863.1 MFS transporter [Limosilactobacillus reuteri];WP_168240079.1 M	205	1	1	1	3.3	44.642	68901	74154	71527.5	42953	33684	38318.5	1.86666	0.313297
ABQ82293.1	ABQ82293.1;AGN98230.1;CUU11561.1;CUR43742.1;CUR36844.1;CCC03844.1;BAG24532.1;AKP00242.1;OPG89401.1;EGC14823.1;PWT30121.1;OTA77402.1;PWT41134.1;WP_229276722.1;WP_086143104.1;WP_086143068.1;EEI08966.1;KRK45033.1;WP_003669506.1;UGQ32728.1;PTS16704.1;OTA87264.1;OTA83924.1;OTA78087.1;OTA74922.1;OTA71504.1;OTA68247.1;OAV46406.1;OTA55390.1;OTA50155.1;OTA49504.1;PTS30503.1;OTA45100.1;OJI10472.1;WP_016496…	ABQ82293.1 transcriptional regulator, MarR family [Limosilactobacillus reuteri subsp. reuteri];AGN98230.1 transcriptional regulator, MarR family [Limosilactobacillus reuteri I5007];CUU11561.1 MarR family transcriptional regulator [Limosilactobacillus reute	133	4	4	1	38.9	17.007	222950	129290	176120	186370	128790	157580	1.11765	0.94625
ABQ82298.1	ABQ82298.1;OAV46411.1;UNL40770.1;UHC31329.1;UGQ32733.1;PWT41129.1;WP_003669514.1;AKP00247.1;BAG24537.1;EEI08971.1;EGC14828.1;KRK50342.1;OFB59070.1;UXE89341.1;PTS16699.1;PTS30508.1;PWT30126.1;PWT38226.1;QBE46577.1;WP_216271167.1;QPB65379.1;QWS04238.1;ROV63503.1;TSB19910.1;UPG78108.1;WP_109897269.1;UAW62559.1;WP_217324516.1;WP_229288012.1;WP_261296254.1;UYQ75071.1;UAW60284.1;WP_078009485.1;WP_26024…	ABQ82298.1 Uncharacterized protein Lreu_0022 [Limosilactobacillus reuteri subsp. reuteri];OAV46411.1 hypothetical protein A9P83_01975 [Limosilactobacillus reuteri];UNL40770.1 hypothetical protein G8B24_05945 [Limosilactobacillus reuteri];UHC31329.1 two-com	118	5	1	1	30	32.39	23903	18103	21003	25327	30558	27942.5	0.751651	0.486493
UGQ32736.1	UGQ32736.1;OTA78095.1;PWT30129.1;PWT38229.1;OYS47789.1;QBE46580.1;KRK50345.1;OTA77410.1;OTA68255.1;OTA71975.1;OTA71512.1;OTA62147.1;OTA74914.1;QLQ61558.1;OTA83932.1;PTS30511.1;OTA55398.1;OTA87256.1;OTA90210.1;OYS49322.1;PTV04964.1;OTA50147.1;OTA46480.1;AKP00250.1;AMY14077.1;AWD61393.1;BAG24540.1;CUR36852.1;PTS16696.1;CCC03836.1;CUR43750.1;UYQ75074.1;WP_229280321.1;WP_094561068.1;WP_086132482.1;RO…	UGQ32736.1 phosphatidylglycerophosphatase A [Limosilactobacillus reuteri];OTA78095.1 phosphatidylglycerophosphatase [Limosilactobacillus reuteri];PWT30129.1 phosphatidylglycerophosphatase A [Limosilactobacillus reuteri];PWT38229.1 phosphatidylglycerophosph	182	9	9	9	48.5	18.978	3746400	3422100	3584250	2084300	2040400	2062350	1.73794	0.178232
WLR78724.1	WLR78724.1;EEI08985.1;OYS52456.1;OYS48093.1;OYS47066.1;OXE60019.1;OUL55817.1;OTA90219.1;OTA87247.1;OTA83941.1;OTA78104.1;OTA76534.1;UNL40758.1;PTS16686.1;WP_003669536.1;WJK30306.1;WP_003665291.1;AXX74304.1;BAG24550.1;OYS61384.1;OTA50138.1;CUU11578.1;CUR43759.1;OCW68486.1;CCC03828.1;OYS57076.1;OYS54919.1;OTA53795.1;OYS62388.1;OTA60470.1;OTA68265.1;VTZ87944.1;OYS65794.1;OYS63986.1;OYS62678.1;OTA709…	WLR78724.1 hypothetical protein Q3A95_05550 [Limosilactobacillus reuteri];EEI08985.1 efflux transporter, RND family, MFP subunit [Limosilactobacillus reuteri MM2-3];OYS52456.1 RND transporter MFP subunit [Limosilactobacillus reuteri];OYS48093.1 RND transpo	207	3	3	3	41.9	14.925	79764	88749	84256.5	91050	70237	80643.5	1.0448	0.952744
OON65182.1	OON65182.1;PWT38240.1;WP_168240093.1;WP_229306483.1;WP_229286241.1;WP_285227658.1;WP_285142956.1;WP_272648886.1;WP_260241024.1;WP_260240732.1;WP_170090746.1;PWT42438.1;WP_229280806.1;WP_229280324.1;WP_229278216.1;WP_229275102.1;WP_229269643.1;WP_229267910.1;WP_228341214.1;WP_218046563.1;WP_016496363.1;WP_078009475.1;WP_019251831.1;WP_019253746.1;WP_113897050.1;WP_003675520.1;WP_011953358.1;WP_153…	OON65182.1 peptide ABC transporter ATP-binding protein [Limosilactobacillus reuteri];PWT38240.1 ABC transporter ATP-binding protein [Limosilactobacillus reuteri];WP_168240093.1 ABC transporter ATP-binding protein [Limosilactobacillus reuteri];WP_229306483.	180	2	2	2	12.6	26.044	77588	72180	74884	76714	101300	89007	0.841327	0.632647
WP_262865997.1	WP_262865997.1;KGE72119.1;OTA62962.1;OTA73135.1;QIZ03493.1;OFB60140.1;OTA76366.1;OTA87788.1;OUL55758.1;UGQ32753.1;OCW62678.1;OUP90218.1;OCW61918.1;OTA83126.1;AGN98259.1;OTA84024.1;PIN30014.1;AEI57396.1;AGR63542.1;AMY14093.1;ANU52262.1;BAG24555.1;CCC03822.1;CUR37226.1;CUR39839.1;CUR43253.1;OTA49355.1;OTA45940.1;OTA43443.1;OON64853.1;ABQ82318.1;KRK50363.1;UNL40750.1;UPG78128.1;UXE89363.1;UYQ75092.1…	WP_262865997.1 OsmC family protein [Limosilactobacillus reuteri];KGE72119.1 peroxiredoxin [Limosilactobacillus reuteri];OTA62962.1 peroxiredoxin [Limosilactobacillus reuteri];OTA73135.1 peroxiredoxin [Limosilactobacillus reuteri];QIZ03493.1 OsmC family pro	174	8	8	8	42	18.795	4848100	4707800	4777950	2998300	2328400	2663350	1.79396	0.1258
EEI08890.1	EEI08890.1;UNL40728.1;OYS92897.1;WP_229286259.1;UCN17563.1;WP_273774820.1;QWS04273.1;WP_241545417.1;WP_228342504.1;WP_229286729.1;WP_260240901.1;UZM90278.1;VTZ88105.1;WJK30345.1;WP_003675487.1;WP_003665337.1;UUW68588.1;QPB65420.1;OTA68208.1;OTA69873.1;OYS47092.1;OYS60052.1;OYS52482.1;OYS52084.1;OYS51293.1;OYS48067.1;OYS47204.1;OXE59989.1;OTA72448.1;OTA85972.1;OTA83860.1;OTA79376.1;OTA79032.1;OTA7…	EEI08890.1 peptidase C26 [Limosilactobacillus reuteri MM2-3];UNL40728.1 gamma-glutamyl-gamma-aminobutyrate hydrolase family protein [Limosilactobacillus reuteri];OYS92897.1 gamma-glutamyl-gamma-aminobutyrate hydrolase [Limosilactobacillus reuteri];WP_22928	188	4	4	4	21.5	27.281	839960	758550	799255	464100	447080	455590	1.75433	0.170646
ABQ82344.1	ABQ82344.1;QPB65426.1;WP_003669597.1;UYQ75120.1;UPG78155.1;UNL40722.1;UHC31377.1;UGQ32780.1;UAW62605.1;TSB20286.1;sp|B2G550.1|PURA_LIMRJ;ROV62082.1;sp|A5VHM0.1|PURA_LIMRD;QBE46624.1;KRK46727.1;AKP00295.1;BAG24582.1;EEI08896.1;PWT36723.1;EGC14879.1;OAV46336.1;PTS14504.1;PTS27195.1;PWT30155.1;WP_153704811.1;PWT39042.1;QWS04280.1;WP_109897725.1;UAW60334.1;UNL36976.1	ABQ82344.1 Adenylosuccinate synthetase [Limosilactobacillus reuteri subsp. reuteri];QPB65426.1 adenylosuccinate synthase [Limosilactobacillus reuteri];WP_003669597.1 adenylosuccinate synthase [Limosilactobacillus reuteri];UYQ75120.1 adenylosuccinate syntha	30	26	1	1	61.6	47.725	19612	14466	17039	24754	47781	36267.5	0.469815	0.108628
ABQ82373.1	ABQ82373.1;OYS93138.1;OTA72246.1;OTA75112.1;OTA46046.1;OTA78268.1;OTA81494.1;OTA84858.1;OTA88838.1;OUL55734.1;OXE60838.1;OYS84533.1;OYS87752.1;CUU13387.1;KEQ20313.2;OYS96039.1;OYS96979.1;OYT01974.1;WP_134989727.1;OTA60593.1;OTA56143.1;AMY15032.1;ANU52536.1;AXX75149.1;EEI08839.1;KEK17008.2;UXE90412.1;UCN20171.1;UZM91155.1;CUR43876.1;WP_229278890.1;WP_041821947.1;WP_035153464.1;WP_003673070.1;WLR80…	ABQ82373.1 Na+ dependent nucleoside transporter domain protein [Limosilactobacillus reuteri subsp. reuteri];OYS93138.1 NupC/NupG family nucleoside CNT transporter [Limosilactobacillus reuteri];OTA72246.1 nucleoside permease [Limosilactobacillus reuteri];OT	172	12	12	12	30.8	44.04	54972000	53777000	54374500	53669000	45096000	49382500	1.10109	0.795157
ABQ82378.1	ABQ82378.1;UZM90186.1;UXE89422.1;UUW68623.1;UPG78189.1;WP_094560891.1;UIN25237.1;UIT53996.1;WP_153707611.1;WP_153700707.1;WP_257496787.1;WP_229392822.1;WP_229285480.1;WP_229275557.1;WP_229272529.1;WP_218046615.1;UNL40688.1;UHC31410.1;PTS28224.1;UYQ75152.1;VTZ88757.1;OCW69392.1;WP_099979641.1;OCW65794.1;OCW65140.1;OCW64179.1;PIN31006.1;PTM29807.1;WP_003665380.1;WLR80636.1;WLC95926.1;WP_094502709.1…	ABQ82378.1 chromosome segregation ATPase [Limosilactobacillus reuteri subsp. reuteri];UZM90186.1 AAA family ATPase [Limosilactobacillus reuteri];UXE89422.1 AAA family ATPase [Limosilactobacillus reuteri];UUW68623.1 AAA family ATPase [Limosilactobacillus re	176	13	13	13	47.3	28.007	1297500	1368400	1332950	1459900	1293800	1376850	0.968116	0.879602
WLR80634.1	WLR80634.1;UPG78191.1;UHC31412.1;WP_035157579.1;UIT53998.1;WP_229274313.1;WP_003669672.1;WP_229272528.1;WP_153706625.1;WP_113896985.1;WP_094504357.1;WP_019253201.1;UXE89424.1;WP_003670334.1;WP_003665382.1;UNL37006.1;WLC95928.1;VTZ88755.1;UZM90184.1;QWS04318.1;RMX24565.1;RNF37968.1;UFK65575.1;OYT03134.1;UCN17464.1;OYS96936.1;OYS96027.1;TSB18589.1;UGQ32815.1;UFK68314.1;UCN19231.1;ROV63212.1;UAW6264…	WLR80634.1 DUF951 domain-containing protein [Limosilactobacillus reuteri];UPG78191.1 DUF951 domain-containing protein [Limosilactobacillus reuteri];UHC31412.1 DUF951 domain-containing protein [Limosilactobacillus reuteri];WP_035157579.1 DUF951 domain-conta	162	1	1	1	22.6	6.9953	147960	145580	146770	139280	144420	141850	1.03468	0.937769
ABQ82381.1	ABQ82381.1;WP_086141065.1;WP_003669674.1;WLR80633.1;WLC95929.1;WJK30385.1;VTZ88754.1;UZM90183.1;UYQ75155.1;WP_085679923.1;WP_086118493.1;PWT40378.1;UXE89425.1;UUW68626.1;UPG78192.1;QBE46661.1;PWT43603.1;WP_003670336.1;WP_122480857.1;QLQ61437.1;WP_134906741.1;CUR36635.1;OON65447.1;OJI10423.1;OCX49909.1;OCW69389.1;OCW67562.1;OCW65791.1;OCW65143.1;OYT08037.1;OYS73387.1;WP_273780627.1;WP_271901130.1;…	ABQ82381.1 GTP-binding protein YchF [Limosilactobacillus reuteri subsp. reuteri];WP_086141065.1 redox-regulated ATPase YchF [Limosilactobacillus reuteri];WP_003669674.1 MULTISPECIES: redox-regulated ATPase YchF [Limosilactobacillus];WLR80633.1 redox-regula	173	24	24	5	68.5	39.844	8895100	9935100	9415100	7173700	7943300	7558500	1.24563	0.561343
PWT66301.1	PWT66301.1;AKP00341.1;UYQ75160.1;UXE89430.1;UUW68631.1;UPG78197.1;QDK49407.1;PWT69173.1;OUP89912.1;PWT64153.1;OON65442.1;OPG89318.1;OTA42908.1;OTA46033.1;OTA49367.1;OTA51448.1;OCX49914.1;OCW67567.1;OJI10418.1;OTA56093.1;OTA72196.1;OTA75107.1;OTA78251.1;OTA79783.1;OTA81447.1;OTA84845.1;OTA58749.1;OTA63972.1;OTA71528.1;OCW69384.1;OCW65786.1;WJK30390.1;WLC95934.1;ABQ82386.1;QPB65468.1;ROV63206.1;RMX…	PWT66301.1 purine-nucleoside phosphorylase [Limosilactobacillus reuteri];AKP00341.1 purine nucleoside phosphorylase [Limosilactobacillus reuteri];UYQ75160.1 purine-nucleoside phosphorylase [Limosilactobacillus reuteri];UXE89430.1 purine-nucleoside phosphor	178	13	13	13	80.5	25.751	12549000	13461000	13005000	14900000	14012000	14456000	0.899626	0.740979
KRK50408.1	KRK50408.1;WP_169471308.1;UPG78203.1;UUW68637.1;WP_122480850.1;UXE89436.1;WP_086142257.1;WP_229305131.1;WP_229272518.1;WP_113896969.1;TGY47351.1;VTZ88743.1;WP_042746019.1;UYQ75166.1;WP_003669691.1;WP_003665402.1;WLR80622.1;WLC95940.1;ROV63200.1;TGY64203.1;UZM90172.1;UIN25223.1;OYT02391.1;OYT07456.1;UFK68326.1;OYT03122.1;UNL40674.1;UNL37017.1;UIT54010.1;UHC31424.1;TSB20248.1;UGQ32827.1;UFK65587.1;…	KRK50408.1 branched-chain amino acid transport [Limosilactobacillus reuteri subsp. reuteri];WP_169471308.1 AzlD domain-containing protein [Limosilactobacillus reuteri];UPG78203.1 AzlD domain-containing protein [Limosilactobacillus reuteri];UUW68637.1 AzlD	162	3	3	3	21	11.303	282270	306210	294240	157150	175570	166360	1.76869	0.363118
OTA64976.1	OTA64976.1;WP_094536825.1;WP_107720827.1;KEK16560.1;WP_042746018.1;OTA52011.1;WP_035170449.1;WP_035161933.1;OTA46858.1;OTA76200.1;UUW68638.1;WP_219285819.1;OTA50087.1;EDX43453.1;WP_257536294.1;WP_276612695.1;WP_267865126.1;WP_267493719.1;CUR42534.1;RMX28034.1;WP_285227833.1;WP_035168009.1;PWT49260.1;PWT54109.1;UZM90170.1;WP_134906623.1;ANU52329.1;AMY14004.1;KEK16989.1;OTA85168.1;WP_251939926.1;OF…	OTA64976.1 transcriptional regulator [Limosilactobacillus reuteri];WP_094536825.1 LysR family transcriptional regulator [Limosilactobacillus reuteri];WP_107720827.1 LysR family transcriptional regulator [Limosilactobacillus reuteri];KEK16560.1 transcriptio	191	2	2	2	9.6	32.617	46442	48483	47462.5	28922	21092	25007	1.89797	0.298877
ABQ82400.1	ABQ82400.1;WP_225431874.1;WP_231093588.1;CUR42551.1;CUU13360.1;UGQ32835.1;AKP00355.1;AGO00040.1;UHC31432.1;UYQ75174.1;WP_011953371.1;WP_016497171.1;WP_225420506.1;WLR80615.1;PWT54715.1;OUL55717.1;WP_003675912.1;PWT42184.1;PTS28244.1;WP_225356762.1;PTS15309.1;PWT34953.1;PWT32628.1;OTA85174.1;KRK50415.1;PWT58684.1;EGC14941.1;EEI08867.1;WP_229408602.1;PWT64033.1;AGR63612.1;OAV47120.1;OFB59606.1;OTA4…	ABQ82400.1 phosphatase/phosphohexomutase-like protein [Limosilactobacillus reuteri subsp. reuteri];WP_225431874.1 HAD hydrolase-like protein [Limosilactobacillus reuteri];WP_231093588.1 HAD hydrolase-like protein [Limosilactobacillus reuteri];CUR42551.1 Be	239	10	10	10	56.8	23.632	3387300	3341200	3364250	2210900	2127500	2169200	1.55092	0.290931
QKT16110.1	QKT16110.1;WP_035156187.1;KEK16568.1;WP_229282823.1;QDK49390.1;WP_065867263.1;VTZ90081.1;WP_072575193.1;WJK30406.1;WP_065533553.1;OTA64967.1;WP_020842845.1;WP_094511321.1;WP_019253962.1;WLR80612.1;WP_124216504.1;WP_162215980.1;PTV04872.1;WP_229274309.1;PTS28246.1;WP_113896956.1;WP_153706634.1;UCN17442.1;UUW68647.1;WP_003665417.1;WP_019251507.1;RNF37946.1;WP_229282292.1;WP_153703327.1;WP_229284877…	QKT16110.1 AI-2E family transporter [Limosilactobacillus reuteri];WP_035156187.1 AI-2E family transporter [Limosilactobacillus reuteri];KEK16568.1 membrane protein [Limosilactobacillus reuteri];WP_229282823.1 AI-2E family transporter [Limosilactobacillus r	196	2	2	2	6.6	39.766	114180	135100	124640	48988	48569	48778.5	2.55522	0.11312
ABQ82412.1	ABQ82412.1;OTA74323.1;OTA67037.1;OTA51992.1;sp|A5VHT8.1|PURL_LIMRD;WP_085649648.1;WP_078009396.1;WP_085721934.1;WP_285227823.1;WP_086120152.1;WP_152715238.1;WP_181462258.1;WP_085679977.1;WP_182589985.1;WP_169477809.1;WP_169472829.1;WP_169471788.1;WP_153706640.1;WP_153703813.1;WP_153703322.1;WP_153702214.1;OTA73599.1;OTA75538.1;OTA64957.1;OTA78051.1;OTA50106.1;OTA51595.1;PWT32640.1;PWT30210.1;PUH3…	ABQ82412.1 phosphoribosylformylglycinamidine synthase subunit II [Limosilactobacillus reuteri subsp. reuteri];OTA74323.1 phosphoribosylformylglycinamidine synthase II [Limosilactobacillus reuteri];OTA67037.1 phosphoribosylformylglycinamidine synthase II [L	236	3	3	3	7.7	80.944	183600	93757	138678	125010	120410	122710	1.13013	0.930049
ABQ82418.1	ABQ82418.1;UFK68356.1;UCN19193.1;UCN17426.1;UIT54045.1;UIN25191.1;UHC31449.1;UGQ32852.1;UFK65617.1;PWT32646.1;UPG78228.1;OYT07433.1;OYT03099.1;UAW62682.1;OUN49590.1;PWT36715.1;UYQ75191.1;UZM90147.1;VTZ90033.1;WJK30426.1;WLR80591.1;WP_003665449.1;UNL40647.1;UNL37045.1;OYT02365.1;OUP89877.1;OYS96976.1;OCW65196.1;OCW65555.1;OCW65586.1;OCW69308.1;OCW71133.1;KEQ20353.1;PWT34971.1;PWT58702.1;OAV47102.1…	ABQ82418.1 phosphoglycerate mutase [Limosilactobacillus reuteri subsp. reuteri];UFK68356.1 2,3-bisphosphoglycerate-dependent phosphoglycerate mutase [Limosilactobacillus reuteri];UCN19193.1 2,3-diphosphoglycerate-dependent phosphoglycerate mutase [Limosila	158	21	21	4	86.4	26.121	52102000	63063000	57582500	50296000	61087000	55691500	1.03395	0.923691
OTA74474.1	OTA74474.1;OYS92084.1;OYS93769.1;OTA60572.1;OYS58524.1;OTA50019.1;AKP00404.1;AMY13953.1;BAG24684.1;CCC03148.1;CUR37901.1;CUR39341.1;CUR41134.1;CUR44184.1;CUU13303.1;EEI09664.1;EGC15795.1;OAV47182.1;OFB59874.1;OJI10346.1;OPG89267.1;OTA47632.1;OTA47729.1;OTA62943.1;OYS87778.1;OYS96587.1;OYS69794.1;ABQ82447.1;WP_229269003.1;WP_086120127.1;WP_123835346.1;WP_134988400.1;WP_229276502.1;WP_003667139.1;P…	OTA74474.1 hypothetical protein BHL76_09730 [Limosilactobacillus reuteri];OYS92084.1 hypothetical protein CBG18_01070 [Limosilactobacillus reuteri];OYS93769.1 hypothetical protein CBG15_05615 [Limosilactobacillus reuteri];OTA60572.1 hypothetical protein BH	180	3	3	3	22.6	12.058	2214400	1888100	2051250	2224400	1753500	1988950	1.03132	0.986934
ABQ82453.1	ABQ82453.1;OTA76524.1;OTA74661.1;OTA72345.1;OTA71848.1;OTA68124.1;OTA60531.1;OTA55910.1;OTA46630.1;OYS99409.1;QPB65528.1;RMX27915.1;AKP00410.1;WP_003674526.1;WP_003665484.1;WLR80555.1;WP_086120590.1;OTA44693.1;OTA81033.1;AXX74160.1;OYT09181.1;AGN99986.1;OYS58529.1;OUL55537.1;OTA86422.1;OJI10340.1;OPG89248.1;OTA42772.1;OTA77920.1;QKT16054.1;OYS49967.1;OYS48321.1;OYS45968.1;OXE59890.1;OTA82145.1;OT…	ABQ82453.1 transcriptional regulator, BadM/Rrf2 family [Limosilactobacillus reuteri subsp. reuteri];OTA76524.1 Rrf2 family transcriptional regulator [Limosilactobacillus reuteri];OTA74661.1 Rrf2 family transcriptional regulator [Limosilactobacillus reuteri	206	2	2	2	26.4	11.425	137970	139040	138505	152360	138760	145560	0.951532	0.810301
PWT62372.1	PWT62372.1;CUR43568.1;CCC03161.1;ABQ82459.1;WP_172381007.1;WP_229393034.1;UAW62715.1;UAW60457.1;QQR15414.1;QKT16047.1;KRK51618.1;KGE72510.1;EDX43510.1;CUU13289.1;CUR41274.1;OTA46636.1;CUR38258.1;UUW68698.1;OTA55916.1;WP_003665497.1;AGN99980.1;CUR36881.1;UCN19157.1;UGQ32889.1;UCN17389.1;UPG78266.1;WP_217324472.1;WP_191980653.1;WP_261296283.1;PWT44290.1;OTA50851.1;OTA48814.1;EEI09677.1;PWT38455.1;W…	PWT62372.1 ClC family H(+)/Cl(-) exchange transporter [Limosilactobacillus reuteri];CUR43568.1 Voltage-gated chloride channel family protein [Limosilactobacillus reuteri];CCC03161.1 conserved hypothetical protein [Limosilactobacillus reuteri subsp. suis];A	182	5	5	5	12.7	49.836	462180	402710	432445	269320	155410	212365	2.03633	0.242838
WP_229408978.1	WP_229408978.1;WP_035151321.1;WP_229407397.1;WP_109884311.1;WP_086131392.1;WP_086120504.1;WP_085719499.1;WP_072575168.1;WP_065533599.1;WP_035168249.1;WP_016497140.1;WP_152717745.1;WP_260245932.1;WP_003671331.1;PWT41661.1;WP_003674553.1;WP_134988435.1;RNF37897.1;PWT69280.1;RMX27929.1;WP_229411563.1;WP_152726358.1;OCW62846.1;OTA77239.1;OON65977.1;OJI10326.1;OFB58958.1;OCX47428.1;OCW71352.1;OCW69092…	WP_229408978.1 endonuclease III [Limosilactobacillus reuteri];WP_035151321.1 endonuclease III [Limosilactobacillus reuteri];WP_229407397.1 endonuclease III [Limosilactobacillus reuteri];WP_109884311.1 endonuclease III [Limosilactobacillus reuteri];WP_08613	195	4	4	4	28.9	24.576	76163	68145	72154	47276	59517	53396.5	1.35129	0.677675
ABQ82470.1	ABQ82470.1;OTA56933.1;OXE59873.1;PTS16337.1;PTS29771.1;PTV03538.1;PWT31428.1;PWT32712.1;PWT34850.1;OTA85146.1;OTA87629.1;OUL55555.1;OTA49032.1;OTA45035.1;PWT38465.1;AGR63663.1;AKP00427.1;AMY13928.1;ANU52396.1;AXX74143.1;BAG24706.1;CCC03174.1;CUR37973.1;CUR43456.1;AGN99965.1;CUU13276.1;EEI09688.1;OTA81008.1;OTA46647.1;KGE72499.1;OTA49392.1;WP_153706555.1;WP_169472614.1;WP_169477967.1;WP_216271220.…	ABQ82470.1 sodium/proton antiporter NapA, CPA2 family [Limosilactobacillus reuteri subsp. reuteri];OTA56933.1 sodium:proton antiporter [Limosilactobacillus reuteri];OXE59873.1 cation:proton antiporter [Limosilactobacillus reuteri];PTS16337.1 cation:proton	194	3	3	3	10.3	41.502	472300	134630	303465	530980	406300	468640	0.647544	0.325059
AGR63668.1	AGR63668.1;AKP00432.1;ABQ82475.1;BAG24711.1;OFB58964.1;OCW71342.1;OCW65218.1;OAV46710.1;UZM90081.1;VTZ89479.1;OCW62856.1;WJK30479.1;KGE72494.1;KEQ21393.1;PWT41653.1;PWT44305.1;WLR80531.1;WP_229268468.1;TGY63740.1;OCX47420.1;OPG89215.1;OJI10316.1;PWT59267.1;OTA45030.1;OTA46802.1;OTA49037.1;OTA50085.1;KEK16258.1;KEK14239.1;EGC15824.1;EEI09693.1;UYQ75244.1;UXE89523.1;UPG78282.1;UNL40587.1;UNL37106.1…	AGR63668.1 exopolyphosphatase [Limosilactobacillus reuteri TD1];AKP00432.1 Ppx/GppA phosphatase [Limosilactobacillus reuteri];ABQ82475.1 Ppx/GppA phosphatase [Limosilactobacillus reuteri subsp. reuteri];BAG24711.1 exopolyphosphatase [Limosilactobacillus re	186	12	12	12	43.3	35.713	1360200	1394100	1377150	1315600	1254400	1285000	1.07171	0.909025
OTA87609.1	OTA87609.1;OTA85167.1;OFB59623.1;OCX47404.1;PTM27615.1;PIN30064.1;VTZ89530.1;WP_169477976.1;WP_153703127.1;WP_003667197.1;WLR80514.1;WLC96053.1;WJK30496.1;UGQ32921.1;UYQ75261.1;UXE89540.1;UUW68731.1;OJI10300.1;OON65953.1;OPG89231.1;UHC31518.1;OTA65499.1;WP_003665588.1;OTA47314.1;OTA70990.1;OTA72938.1;OTA73974.1;OTA77968.1;OXE59852.1;OTA80987.1;OYT02119.1;OYS69564.1;OTA67629.1;UZM90063.1;OUP87470.…	OTA87609.1 ribose-phosphate pyrophosphokinase [Limosilactobacillus reuteri];OTA85167.1 ribose-phosphate pyrophosphokinase [Limosilactobacillus reuteri];OFB59623.1 ribose-phosphate pyrophosphokinase [Limosilactobacillus reuteri];OCX47404.1 ribose-phosphate	171	17	17	7	47.1	36.16	26483000	23511000	24997000	21475000	17151000	19313000	1.29431	0.49607
OFB59734.1	OFB59734.1;OPG89207.1;AGN99942.1;AKP00449.1;AMY13906.1;BAG24729.1;CCC03197.1;CUR36579.1;CUU13253.1;EEI09711.1;EGC15842.1;OTA53919.1;OAV46727.1;OJI10299.1;OTA44357.1;OTA87608.1;OTA46819.1;OTA47378.1;OTA48555.1;UGQ32922.1;KRK51651.1;OTA65498.1;OTA67628.1;OTA71004.1;OTA71233.1;OTA75672.1;ABQ82492.1;OTA49054.1;CUR43433.1;OTA76744.1;UCN17354.1;UHC31519.1;PTS29749.1;QBE46765.1;QDK49303.1;QKT16012.1;QPB…	OFB59734.1 hypothetical protein BAY40_02225, partial [Limosilactobacillus reuteri];OPG89207.1 hypothetical protein B5D07_01365 [Limosilactobacillus reuteri];AGN99942.1 hypothetical protein LRI_1733 [Limosilactobacillus reuteri I5007];AKP00449.1 hypothetica	161	6	6	1	60.4	23.805	14181000	8954900	11567950	14003000	14544000	14273500	0.810449	0.504402
WP_260234980.1	WP_260234980.1;OTA75670.1;OYS57645.1;OXE59849.1;OTA87606.1;OTA82685.1;OTA80984.1;OTA76742.1;OTA73977.1;WP_153704497.1;OTA71231.1;OTA71002.1;OTA65496.1;PWT48198.1;UXE89544.1;UYQ75264.1;OYS59113.1;OYS63002.1;OYS69561.1;OYS72801.1;OYS74286.1;OYS75594.1;OYS87876.1;OYT02116.1;OYT07025.1;OTA53917.1;OYT07202.1;OTA49056.1;OTA47376.1;AEI57613.1;AKP00451.1;AMY13904.1;ANU52419.1;VTZ89538.1;UZM90060.1;BAG247…	WP_260234980.1 HD domain-containing protein [Limosilactobacillus reuteri];OTA75670.1 hypothetical protein BHL80_02945 [Limosilactobacillus reuteri];OYS57645.1 hypothetical protein CBF88_10645 [Limosilactobacillus reuteri];OXE59849.1 hypothetical protein AD	200	12	12	12	38	53.25	1771000	1630000	1700500	1801800	1598000	1699900	1.00035	0.948852
WP_228342105.1	WP_228342105.1;WP_226061916.1;PWT51591.1;OYS57642.1;OYS75591.1;OYS61844.1;QIZ03669.1;PWT37412.1;PWT39633.1;PWT40299.1;PWT42894.1;PWT56639.1;PWT31290.1;PWT57052.1;PWT62063.1;PWT63164.1;PWT68262.1;QBE46772.1;QDK49298.1;QDR71829.1;QLL75318.1;OJI10294.1;OFB60022.1;OCX47398.1;EEI65389.1;EGC15849.1;AGR63691.1;AMY13901.1;ANU52422.1;AXX74115.1;CUU13248.1;EDX43577.1;EEI09654.1;KEK16235.1;OCW67088.1;OCW699…	WP_228342105.1 DNA-directed RNA polymerase subunit delta [Limosilactobacillus reuteri];WP_226061916.1 DNA-directed RNA polymerase subunit delta [Limosilactobacillus reuteri];PWT51591.1 DNA-directed RNA polymerase subunit delta [Limosilactobacillus reuteri]	178	3	3	3	22.7	20.808	821280	800580	810930	910440	1236500	1073470	0.755429	0.416342
WP_153703161.1	WP_153703161.1;OCX47392.1;OTA53397.1;OTA49065.1;OTA47922.1;OTA46830.1;OCW61949.1;QPB65581.1;OCW71641.1;OJI10288.1;OCW68201.1;OCW65919.1;OCW63037.1;QQR15370.1;UCN19111.1;RMX25006.1;OTA65487.1;OTA67617.1;OTA69907.1;QWS04440.1;AWD61632.1;AXX74109.1;OTA47367.1;OTA75661.1;OAV47970.1;KGE72465.1;AGN99931.1;AGR63697.1;AKP00463.1;AMY13895.1;ANU52428.1;OTA74815.1;OTA75612.1;RMX27970.1;OFB57934.1;KEQ20250.1…	WP_153703161.1 class A sortase [Limosilactobacillus reuteri];OCX47392.1 class A sortase [Limosilactobacillus reuteri];OTA53397.1 class A sortase [Limosilactobacillus reuteri];OTA49065.1 class A sortase [Limosilactobacillus reuteri];OTA47922.1 class A sorta	191	7	7	7	35.8	23.991	1050500	985100	1017800	789420	538890	664155	1.53247	0.305082
ABQ82511.1	ABQ82511.1;WLC96073.1;QLQ61372.1;QPB65587.1;QQR15363.1;QWS04445.1;RMX27978.1;WLR80494.1;PWT37400.1;WP_003667234.1;WP_042746584.1;WP_134988507.1;WP_136000986.1;WP_229282477.1;WP_229286671.1;WJK30515.1;OTA53391.1;QIZ03680.1;OTA65482.1;KGE72458.1;KRK46801.1;OAV47975.1;OCW61942.1;OCW63044.1;OCW65912.1;OCW68103.1;OCW71634.1;OCX47385.1;OFB57932.1;OJI10281.1;OON65934.1;OPG89190.1;QKT15996.1;QDK49286.1;O…	ABQ82511.1 LemA family protein [Limosilactobacillus reuteri subsp. reuteri];WLC96073.1 LemA family protein [Limosilactobacillus reuteri];QLQ61372.1 LemA family protein [Limosilactobacillus reuteri];QPB65587.1 LemA family protein [Limosilactobacillus reuter	167	13	13	13	68.8	21.33	8159900	8862700	8511300	10110000	7631400	8870700	0.959485	0.902432
ABQ82512.1	ABQ82512.1;OCW71633.1;WP_019254264.1;WP_019252335.1;WP_003674627.1;WP_003667235.1;WP_003665613.1;WLR80493.1;WLC96074.1;WJK30516.1;UYQ75282.1;WP_229283007.1;WP_242079505.1;WP_273780458.1;VTZ89586.1;UXE89560.1;PWT33981.1;UUW68751.1;QKT15995.1;WP_042746583.1;WP_094512424.1;WP_102816470.1;OCW65911.1;OTA47361.1;OCW63045.1;OTA43570.1;OPG89191.1;OON65933.1;OJI10280.1;OCX47384.1;OUL55351.1;WP_123072604.1…	ABQ82512.1 Heat shock protein, Metallo peptidase, MEROPS family M48B [Limosilactobacillus reuteri subsp. reuteri];OCW71633.1 zinc metalloprotease HtpX [Limosilactobacillus reuteri];WP_019254264.1 zinc metalloprotease HtpX [Limosilactobacillus reuteri];WP_0	180	8	8	8	42.3	32.779	697710	527940	612825	624580	917560	771070	0.794772	0.498128
WP_273774796.1	WP_273774796.1;WP_229286679.1;WP_094501045.1;WP_085650093.1;WP_216577911.1;WP_168240151.1;WP_153706654.1;WP_136001067.1;WP_102815993.1;WP_094512429.1;WP_078009871.1;VTZ90304.1;UZM90033.1;WP_035153508.1;WP_003667249.1;WP_003665634.1;WLR80480.1;WLC96085.1;WJK30531.1;UYQ75296.1;UXE89574.1;UUW68763.1;UGQ32956.1;UFK68501.1;UPG78333.1;UNL40529.1;UNL37164.1;UIT54168.1;UIN25067.1;UHC31553.1;UFK65765.1;TG…	WP_273774796.1 type II toxin-antitoxin system PemK/MazF family toxin [Limosilactobacillus reuteri];WP_229286679.1 type II toxin-antitoxin system PemK/MazF family toxin [Limosilactobacillus reuteri];WP_094501045.1 type II toxin-antitoxin system PemK/MazF fa	163	1	1	1	12.9	13.83	118260	59930	89095	117680	174950	146315	0.608926	0.270032
WP_229273251.1	WP_229273251.1;EGC15878.1;OTA49084.1;AGN99908.1;AKP00484.1;BAG24764.1;CCC03230.1;CUR36462.1;CUR43399.1;CUU13219.1;EDX43603.1;EEI09622.1;KEK14195.1;ROV62976.1;KEK16214.1;KEQ20268.1;KRK48289.1;OAV48166.1;OFB58006.1;OJI10265.1;OPG89170.1;OTA46269.1;OTA47347.1;OTA47442.1;OTA74005.1;RMX25026.1;OTA82714.1;QWS04464.1;WP_003665639.1;OTA85522.1;PTS14155.1;PTS26771.1;PTV03332.1;PWT30797.1;PWT32387.1;PWT337…	WP_229273251.1 cytosine deaminase [Limosilactobacillus reuteri];EGC15878.1 amidohydrolase family protein [Limosilactobacillus reuteri MM4-1A];OTA49084.1 cytosine deaminase [Limosilactobacillus reuteri];AGN99908.1 cytosine deaminase [Limosilactobacillus reu	201	14	14	14	50.2	46.653	3561400	3249500	3405450	3060600	2950600	3005600	1.13304	0.797904
OCW62878.1	OCW62878.1;RMX25033.1;UUW68772.1;WP_169471507.1;WP_231817477.1;WP_229397025.1;WP_229307542.1;WP_229286045.1;WP_229275503.1;WP_229271031.1;WP_152714902.1;UXE89583.1;WP_003665652.1;WLR80471.1;WLC96094.1;WJK30540.1;VTZ90292.1;UZM90024.1;UYQ75305.1;UPG78342.1;RNF37833.1;OYS62965.1;ROV62969.1;RMX28000.1;OYS99490.1;UNL37173.1;UIT54177.1;UIN25058.1;UHC31562.1;UGQ32965.1;UFK68510.1;UFK65774.1;UCN19085.1;…	OCW62878.1 RNA-binding protein S1 [Limosilactobacillus reuteri];RMX25033.1 RNA-binding protein S1 [Limosilactobacillus reuteri];UUW68772.1 S1 domain-containing RNA-binding protein [Limosilactobacillus reuteri];WP_169471507.1 S1 domain-containing RNA-bindin	167	4	4	4	41.8	17.607	1802200	2275400	2038800	2466100	2960300	2713200	0.751437	0.40829
OTA75645.1	OTA75645.1;UPG78347.1;RMX25039.1;UHC31568.1;VTZ90286.1;UYQ75311.1;ROV62963.1;UXE89589.1;UNL37178.1;PWT64339.1;UGQ32971.1;RNF37827.1;UFK68516.1;UFK65780.1;UCN19080.1;UCN17311.1;UAW60535.1;PWT43950.1;PWT41266.1;QWS04476.1;PWT52575.1;PWT57730.1;PWT57788.1;UZM90018.1;PWT62666.1;PWT39992.1;PWT68887.1;QDK49259.1;QPB65617.1;QBE46815.1;PWT37443.1;WP_003667268.1;WP_016497114.1;AGN99895.1;OTA47955.1;PWT342…	OTA75645.1 lysine--tRNA ligase [Limosilactobacillus reuteri];UPG78347.1 lysine--tRNA ligase [Limosilactobacillus reuteri];RMX25039.1 lysine--tRNA ligase [Limosilactobacillus reuteri];UHC31568.1 lysine--tRNA ligase [Limosilactobacillus reuteri];VTZ90286.1 L	213	39	39	1	68.3	58.269	23774000	23213000	23493500	22013000	21551000	21782000	1.07857	0.836935
ABQ82547.1	ABQ82547.1;WP_216578082.1;WP_035151553.1;WP_020842871.1;WP_016497096.1;WP_003675974.1;WP_003670582.1;WP_003667295.1;WLC96107.1;WJK30554.1;WP_272648913.1;UXE89595.1;WP_228341385.1;WP_229282928.1;OCX48308.1;WP_229396830.1;WP_273774786.1;WP_252413612.1;VTZ90822.1;UYQ75317.1;WP_078009709.1;WP_086142217.1;WP_102816669.1;PWT31786.1;OTA46913.1;OTA43424.1;OTA42398.1;OPG89129.1;PTS29253.1;OYS77594.1;WP_15…	ABQ82547.1 amino acid/peptide transporter [Limosilactobacillus reuteri subsp. reuteri];WP_216578082.1 peptide MFS transporter [Limosilactobacillus reuteri];WP_035151553.1 peptide MFS transporter [Limosilactobacillus reuteri];WP_020842871.1 MULTISPECIES: pe	185	6	6	6	14.8	54.667	5163800	4869800	5016800	6559300	5796100	6177700	0.812082	0.50856
ABQ82553.1	ABQ82553.1;WLC96113.1;WJK30560.1;UZM90004.1;WP_153703725.1;WP_102816673.1;WP_003666262.1;OYS55515.1;UYQ75323.1;QDK49237.1;PWT32996.1;PWT66930.1;QLQ61042.1;PWT31792.1;QLL75394.1;QKT15947.1;VTZ90810.1;PUH34606.1;OYS57241.1;PTS29259.1;OCW70024.1;OCX48314.1;OFB58538.1;OJI10238.1;OON64795.1;OPG89134.1;OTA45511.1;OTA80481.1;OTA47109.1;OTA51895.1;OTA52876.1;OTA67518.1;OTA68978.1;QDR73226.1;QBE46826.1;OT…	ABQ82553.1 transcriptional regulator, GntR family [Limosilactobacillus reuteri subsp. reuteri];WLC96113.1 GntR family transcriptional regulator [Limosilactobacillus reuteri];WJK30560.1 GntR family transcriptional regulator [Limosilactobacillus reuteri];UZM	172	16	16	15	79.8	26.59	6115600	5346800	5731200	4426300	3715500	4070900	1.40785	0.368296
ABQ82556.1	ABQ82556.1;EGC15464.1;PWT69569.1;PWT35651.1;PWT36742.1;PWT41525.1;PWT42808.1;PWT44556.1;PWT59710.1;TGB11346.1;PWT60553.1;PWT64944.1;QBE47407.1;PWT31795.1;QPB67253.1;QWS05167.1;RMX28165.1;KRK51046.1;PWT55138.1;EEI09762.1;BAG24790.1;PTS15698.1;PWT32999.1;PWT66933.1;WP_035164302.1;OCX48317.1;WP_066035613.1;UYQ75326.1;UXE90347.1;WP_109897222.1;UGQ33639.1;PTS29262.1;UNL40499.1;UPG79650.1;OAV47787.1;AK…	ABQ82556.1 RNA binding S1 domain protein [Limosilactobacillus reuteri subsp. reuteri];EGC15464.1 Tex-like protein N-terminal domain protein [Limosilactobacillus reuteri MM4-1A];PWT69569.1 RNA-binding transcriptional accessory protein [Limosilactobacillus r	95	46	2	1	69.8	81.941	317360	329660	323510	270530	254620	262575	1.23207	0.805526
WP_223672216.1	WP_223672216.1;WP_273774196.1;WP_164960478.1;WP_163622165.1;WP_162216417.1;WP_153707141.1;WP_229270355.1;WP_153704771.1;TSB20524.1;WP_153701285.1;WP_152726479.1;WP_229281315.1;WP_229282594.1;WP_229283700.1;WP_285142858.1;WP_153703730.1;WP_153702423.1;WP_289218351.1;WP_283578159.1;WP_229284613.1;WP_257525232.1;WP_257496741.1;WP_251672224.1;WP_240843959.1;WP_229411632.1;WP_229397395.1;WP_229307307.…	WP_223672216.1 cell division protein [Limosilactobacillus reuteri];WP_273774196.1 cell division protein [Limosilactobacillus reuteri];WP_164960478.1 cell division protein [Limosilactobacillus reuteri];WP_163622165.1 cell division protein [Limosilactobacill	254	4	4	4	10.7	58.115	105200	73899	89549.5	78523	51816	65169.5	1.3741	0.655343
ABQ82561.1	ABQ82561.1;VTZ90794.1;EDX41823.1;AKP00517.1;AGN99857.1;CUR37570.1;CUR39689.1;CUR41762.1;CUR42659.1;CUU13179.1;KEK14632.1;AMY13831.1;PWT64956.1;WJK30568.1;UZM89996.1;UYQ75331.1;UUW68815.1;PWT62839.1;UPG78366.1;OYT01073.1;UNL40494.1;PWT42803.1;UGQ32990.1;PWT47718.1;WP_003667318.1;UHC31587.1;WLR80443.1;WP_229270356.1;WP_182586240.1;WP_216578093.1;WP_229267528.1;UXE89608.1;OYS98239.1;OYS94158.1;WP_22…	ABQ82561.1 phosphoglycerate mutase [Limosilactobacillus reuteri subsp. reuteri];VTZ90794.1 2,3-bisphosphoglycerate-dependent phosphoglycerate mutase [Limosilactobacillus reuteri];EDX41823.1 phosphoglycerate mutase 1 family [Limosilactobacillus reuteri subs	179	12	12	12	70.3	27.388	1510700	1434500	1472600	893790	852210	873000	1.68683	0.204033
ABQ82564.1	ABQ82564.1;WP_019252233.1;WP_152719795.1;WP_152709857.1;WP_152704000.1;WP_144841363.1;WP_086142535.1;WP_085680192.1;WP_065533656.1;WP_003675949.1;WP_153706241.1;WP_003667322.1;PWT47721.1;PWT42800.1;WLC96125.1;RNF37797.1;PWT44564.1;UZM89993.1;WP_153703222.1;WP_181462247.1;OTA73750.1;OON64806.1;OTA52865.1;OTA50779.1;OAV47779.1;OTA47120.1;OTA46896.1;OTA45500.1;OPG89145.1;OJI10227.1;WP_191338737.1;PW…	ABQ82564.1 amino acid ABC transporter membrane protein, PAAT family [Limosilactobacillus reuteri subsp. reuteri];WP_019252233.1 MULTISPECIES: amino acid ABC transporter permease [Limosilactobacillus];WP_152719795.1 amino acid ABC transporter permease [Limo	182	6	6	6	37.3	26.062	29581000	33218000	31399500	32867000	36134000	34500500	0.910117	0.769425
ABQ82565.1	ABQ82565.1;EDX41827.1;VTZ90786.1;OTA52864.1;OTA86274.1;OTA73751.1;AGN99853.1;OYS91096.1;AMY13827.1;BAG24799.1;CCC04176.1;CUR37566.1;CUU13175.1;EEI09753.1;OYS88480.1;EGC15473.1;KEK14636.1;KEK15292.1;OYS96441.1;KRK51037.1;OFB59339.1;OJI10226.1;OPG89146.1;OTA45499.1;OTA47121.1;OTA50780.1;OTA75302.1;OYS86524.1;OTA67506.1;OYS54051.1;WP_042746501.1;WP_153702420.1;WP_229285120.1;WP_003667324.1;WP_003675…	ABQ82565.1 amino acid ABC transporter ATP-binding protein, PAAT family [Limosilactobacillus reuteri subsp. reuteri];EDX41827.1 ABC transporter related [Limosilactobacillus reuteri subsp. rodentium];VTZ90786.1 L-cystine import ATP-binding protein TcyC [Limo	202	16	16	0	81.9	27.538	94192000	96402000	95297000	90011000	77102000	83556500	1.14051	0.725415
ABQ82566.1	ABQ82566.1;OTA47122.1;WP_003675946.1;UNL40489.1;QPB65640.1;QBE46838.1;QDK49224.1;OTA50781.1;OTA51882.1;OTA52863.1;OTA67505.1;OTA73752.1;OTA74544.1;OTA75301.1;OTA46894.1;OTA80411.1;WP_003666279.1;OTA86275.1;OTA90350.1;OYS48283.1;OYS49981.1;OYS51028.1;OYS53449.1;OYS54052.1;OTA80494.1;OTA80634.1;OTA45498.1;OPG89147.1;OJI10225.1;AKP00522.1;WP_003667327.1;VTZ90784.1;AWD61708.1;WP_035169574.1;WP_153703…	ABQ82566.1 amino acid ABC transporter substrate-binding protein, PAAT family [Limosilactobacillus reuteri subsp. reuteri];OTA47122.1 amino acid ABC transporter substrate-binding protein [Limosilactobacillus reuteri];WP_003675946.1 transporter substrate-bin	181	25	25	0	63.5	28.516	288860000	269610000	279235000	298480000	246870000	272675000	1.02406	0.943608
ABQ82568.1	ABQ82568.1;CUR37563.1;OTA45496.1;OJI10223.1;AGN99850.1;AKP00524.1;AMY13824.1;AWD61710.1;AXX74045.1;BAG24802.1;CCC04173.1;CUR42677.1;OTA46892.1;CUU13172.1;EDX41830.1;EEI09750.1;EGC15476.1;KEK14639.1;KEK15289.1;KEQ21127.1;KRK51034.1;OAV47775.1;PWT31807.1;PTV05423.1;OPG89149.1;OTA73754.1;WP_273780443.1;PWT69557.1;UPG78373.1;OTA50783.1;OTA51880.1;OTA52861.1;OTA53108.1;OTA67503.1;OTA68993.1;OTA74542.1…	ABQ82568.1 ribose-5-phosphate isomerase [Limosilactobacillus reuteri subsp. reuteri];CUR37563.1 Ribose 5-phosphate isomerase A [Limosilactobacillus reuteri];OTA45496.1 ribose 5-phosphate isomerase A [Limosilactobacillus reuteri];OJI10223.1 ribose 5-phospha	185	15	15	15	75.3	25.036	5554000	5073600	5313800	4344700	4043100	4193900	1.26703	0.531833
ABQ82571.1	ABQ82571.1;AGN99847.1;OCX48332.1;AGR63755.1;AKP00527.1;AMY13821.1;AXX74042.1;BAG24805.1;CCC04170.1;CUR37560.1;CUR41780.1;CUR42683.1;CUU13169.1;PWT35636.1;EGC15479.1;KGE72901.1;KRK51031.1;OAV47772.1;OCW62553.1;OCW63364.1;OCW64076.1;OCW67936.1;OCW70006.1;EEI09747.1;OJI10220.1;OPG89152.1;OTA80499.1;OTA80406.1;WP_229279237.1;WP_229282932.1;OTA50786.1;OTA51877.1;OTA52858.1;OTA53111.1;OTA67500.1;OTA689…	ABQ82571.1 DNA replication and repair protein RadA [Limosilactobacillus reuteri subsp. reuteri];AGN99847.1 DNA repair protein RadA [Limosilactobacillus reuteri I5007];OCX48332.1 DNA repair protein RadA [Limosilactobacillus reuteri];AGR63755.1 DNA repair pr	197	17	17	1	57.3	49.96	3153300	2540200	2846750	3208500	3160600	3184550	0.893925	0.715843
ABQ82572.1	ABQ82572.1;WP_081120414.1;OPG89153.1;KRK51030.1;EGC15480.1;EEI09746.1;CCC04169.1;BAG24806.1;AXX74041.1;AGR63756.1;PWT31811.1;PTS29278.1;PTS15714.1;WP_003675937.1;QKT15928.1;WLR80432.1;WP_020842887.1;UZM89985.1;QPB65646.1;UYQ75342.1;UXE89619.1;UPG78377.1;WP_003667337.1;UGQ33001.1;QWS04509.1;UCN19038.1;WP_117114959.1;QDK49218.1;UAW62821.1;QBE46844.1;PWT64929.1;PWT62850.1;WP_229279236.1;WP_153702415…	ABQ82572.1 PilT protein domain protein [Limosilactobacillus reuteri subsp. reuteri];WP_081120414.1 PIN/TRAM domain-containing protein [Limosilactobacillus reuteri];OPG89153.1 hypothetical protein B5D07_01840 [Limosilactobacillus reuteri];KRK51030.1 hypothe	191	12	12	12	38.2	43.353	2678100	2334300	2506200	2144400	2239400	2191900	1.14339	0.780055
PIN30353.1	PIN30353.1;UAW60576.1;UIT54242.1;TGY49541.1;UZM89979.1;RNF37783.1;RMX28187.1;UNL40477.1;UPG78383.1;UUW68832.1;TGB11324.1;ROV63372.1;UXE89625.1;WP_229268481.1;WP_003667346.1;OYS48271.1;OYS49993.1;TSB20542.1;UAW62826.1;AXX74035.1;UCN17262.1;OYS57122.1;BAG24812.1;OCW68953.1;UIN24992.1;OYS51040.1;OYS53437.1;OYS54064.1;OYS96836.1;OYT01822.1;OYT02279.1;TGY59971.1;WLC96139.1;UHC31604.1;UGQ33007.1;UCN190…	PIN30353.1 transcription termination/antitermination protein NusG [Limosilactobacillus reuteri];UAW60576.1 transcription termination/antitermination protein NusG [Limosilactobacillus reuteri];UIT54242.1 transcription termination/antitermination protein Nus	159	10	10	10	62.9	20.875	10284000	10541000	10412500	9724400	8270900	8997650	1.15725	0.697149
ABQ82578.1	ABQ82578.1;UIT54243.1;UHC31605.1;OYT02280.1;WJK30586.1;WLC96140.1;WP_085721923.1;WP_019252220.1;WP_003666299.1;OYS98967.1;QPB65654.1;UNL37211.1;VTZ90758.1;UZM89978.1;UYQ75349.1;UXE89626.1;UUW68833.1;UPG78384.1;TGY59972.1;RMX24725.1;RMX28188.1;RNF37782.1;OYS96837.1;TGB11323.1;TGY49542.1;UGQ33008.1;UCN19031.1;UCN17261.1;UAW62827.1;UAW60577.1;TSB20543.1;QWS04516.1;QQR15297.1;UIN24991.1;sp|B2G5T1.1|R…	ABQ82578.1 LSU ribosomal protein L11P [Limosilactobacillus reuteri subsp. reuteri];UIT54243.1 50S ribosomal protein L11 [Limosilactobacillus reuteri];UHC31605.1 50S ribosomal protein L11 [Limosilactobacillus reuteri];OYT02280.1 50S ribosomal protein L11 [L	158	12	12	11	79.4	14.869	40430000	41127000	40778500	42404000	48054000	45229000	0.901601	0.746332
ABQ82579.1	ABQ82579.1;PUH34786.1;UNL40475.1;UPG78385.1;UYQ75350.1;WP_029507891.1;WP_229287085.1;WP_042746498.1;WP_003666300.1;WLR80424.1;OXE59765.1;WLC96141.1;VTZ90756.1;UZM89977.1;ROV63370.1;sp|B2G5T2.1|RL1_LIMRJ;RMX28189.1;RMX24726.1;OYT08637.1;TGB11322.1;TGY49543.1;TGY59973.1;UCN19030.1;OTA74531.1;UIT54244.1;PWT66957.1;UAW62828.1;UIN24990.1;UHC31606.1;UGQ33009.1;UFK68553.1;UFK65819.1;UCN17260.1;RNF37781.…	ABQ82579.1 LSU ribosomal protein L1P [Limosilactobacillus reuteri subsp. reuteri];PUH34786.1 50S ribosomal protein L1 [Limosilactobacillus reuteri];UNL40475.1 50S ribosomal protein L1 [Limosilactobacillus reuteri];UPG78385.1 50S ribosomal protein L1 [Limos	162	18	18	18	71.9	27.362	45895000	46648000	46271500	53215000	47461000	50338000	0.919216	0.794085
ABQ82583.1	ABQ82583.1;VTZ88561.1;TGB11319.1;sp|B2G5T6.1|RL10_LIMRJ;ROV63366.1;UPG78388.1;UUW68838.1;UXE89631.1;WP_153702412.1;WP_086136131.1;OAV47760.1;UYQ75354.1;WP_019252214.1;WP_003666309.1;WLR80419.1;WLC96144.1;WJK30591.1;UZM89970.1;TGY49546.1;TGY55948.1;TSB20547.1;UAW60581.1;KGE72913.1;OYS96841.1;OYS62161.1;OYT04558.1;UCN19027.1;OYT02284.1;UNL40472.1;UNL36945.1;UIT54249.1;UIN24985.1;UHC31609.1;UGQ33012…	ABQ82583.1 LSU ribosomal protein L10P [Limosilactobacillus reuteri subsp. reuteri];VTZ88561.1 50S ribosomal protein L10 [Limosilactobacillus reuteri];TGB11319.1 50S ribosomal protein L10 [Limosilactobacillus reuteri];sp|B2G5T6.1|RL10_LIMRJ RecName: Full=La	162	17	17	17	78.9	18.139	77050000	79595000	78322500	84625000	88189000	86407000	0.906437	0.759446
ABQ82584.1	ABQ82584.1;WLR80418.1;UFK68558.1;UFK65824.1;UCN19026.1;UCN17256.1;UAW62831.1;UIN24984.1;UIT54250.1;UHC31610.1;WP_003666310.1;PTV05406.1;UAW60582.1;TSB20548.1;TGY55947.1;PWT45693.1;UGQ33013.1;WJK30592.1;BAG24819.1;OYS53430.1;OCW66188.1;OCW63869.1;OAV47759.1;KRK51018.1;KGE72914.1;OYS86544.1;WLC96145.1;UNL40471.1;VTZ88560.1;UZM89969.1;UYQ75355.1;UXE89632.1;UUW68839.1;UPG78389.1;PUH34641.1;PWT64916.1…	ABQ82584.1 LSU ribosomal protein L12P [Limosilactobacillus reuteri subsp. reuteri];WLR80418.1 50S ribosomal protein L7/L12 [Limosilactobacillus reuteri];UFK68558.1 50S ribosomal protein L7/L12 [Limosilactobacillus reuteri];UFK65824.1 50S ribosomal protein	157	18	18	6	93.4	12.356	163710000	172760000	168235000	152510000	158790000	155650000	1.08085	0.832641
OTA45475.1	OTA45475.1;OTA86330.1;OTA83159.1;OTA80388.1;OTA74629.1;OON61490.1;OTA74520.1;OTA72809.1;OTA63903.1;OTA63053.1;OTA58763.1;WP_229273875.1;OYS69626.1;OTA46379.1;OPG89103.1;VTZ88555.1;UYQ75360.1;OTA48101.1;OYS48259.1;CCC04452.1;OYS50005.1;AXX74023.1;AWD61739.1;ANU50773.1;AKP00545.1;AGN99828.1;AEI57734.1;OXE59754.1;OCW68941.1;OFB57037.1;OJI10200.1;OTA79406.1;OYS57134.1;OYS54526.1;OYS53425.1;OYS51052.1…	OTA45475.1 DUF1700 domain-containing protein [Limosilactobacillus reuteri];OTA86330.1 DUF1700 domain-containing protein [Limosilactobacillus reuteri];OTA83159.1 DUF1700 domain-containing protein [Limosilactobacillus reuteri];OTA80388.1 DUF1700 domain-conta	213	6	6	6	27.6	22.485	1408700	1612700	1510700	1768200	2096800	1932500	0.781734	0.47058
WJK30603.1	WJK30603.1;OCW66177.1;TGB11307.1;TGY49558.1;OTA63897.1;OTA72815.1;OCW66255.1;OCW67998.1;OCW68935.1;OCX48356.1;OAV47748.1;OFB59836.1;OPG89109.1;UNL37225.1;OTA46373.1;OTA48107.1;OTA49962.1;OTA51172.1;OJI10194.1;KRK51007.1;OTA45469.1;KGE72925.1;EGC15505.1;AGN99822.1;UNL40460.1;VTZ88549.1;AMY13797.1;WLR80407.1;WP_153703210.1;WP_153706252.1;WP_169472711.1;WP_172467821.1;WP_229278947.1;WP_134988573.1;W…	WJK30603.1 tRNA adenosine(34) deaminase TadA [Limosilactobacillus reuteri];OCW66177.1 tRNA-specific adenosine deaminase [Limosilactobacillus reuteri];TGB11307.1 nucleoside deaminase [Limosilactobacillus reuteri];TGY49558.1 nucleoside deaminase [Limosilacto	147	2	2	2	20.8	19.069	162650	81969	122310	156810	175500	166155	0.736117	0.461567
QLQ60841.1	QLQ60841.1;CUU13134.1;BAG24833.1;AKP00554.1;AGR63782.1;AGN99819.1;CUR37531.1;CUR38936.1;WP_172380999.1;CUR41828.1;QKT15900.1;sp|A5VIC4.1|RECR_LIMRD;CUR42713.1;KGE72928.1;KEK14669.1;EGC15508.1;KRK51004.1;CCC04443.1;EEI09790.1;EDX41863.1;QWS04537.1;AEI57745.1;WJK30608.1;WP_191980643.1;UFK65837.1;UFK68571.1;VTZ88546.1;sp|B2G5V1.1|RECR_LIMRJ;WLR80404.1;WP_003666331.1;WP_003670523.1;EEI64962.1;WP_0192…	QLQ60841.1 recombination protein RecR [Limosilactobacillus reuteri];CUU13134.1 Recombination protein RecR [Limosilactobacillus reuteri subsp. suis];BAG24833.1 recombination protein RecR [Limosilactobacillus reuteri subsp. reuteri JCM 1112];AKP00554.1 recom	173	5	5	5	45.5	22.114	230180	285990	258085	467110	713560	590335	0.437184	0.0812371
ABQ82599.1	ABQ82599.1;PWT33042.1;QDK49192.1;QDR73182.1;QKT15899.1;QPB65673.1;QWS04538.1;UZM89954.1;VTZ88545.1;WP_003666333.1;WP_086141536.1;WP_153704783.1;WP_003667379.1;PWT41568.1;PWT35608.1;OCW66174.1;PWT69526.1;OCW66252.1;OCW68001.1;OCW68932.1;OFB59833.1;OJI10191.1;OPG89111.1;OTA48110.1;OTA78927.1;OTA51175.1;OTA58772.1;OTA63062.1;OTA63894.1;OTA72818.1;QBE46871.1;PWT66976.1;OTA74638.1;UNL40457.1;RNF37762.…	ABQ82599.1 hypothetical protein Lreu_0329 [Limosilactobacillus reuteri subsp. reuteri];PWT33042.1 DUF2508 domain-containing protein [Limosilactobacillus reuteri];QDK49192.1 DUF2508 family protein [Limosilactobacillus reuteri];QDR73182.1 DUF2508 family prot	161	3	3	3	37.8	9.9892	406770	362790	384780	405110	341980	373545	1.03008	0.930908
AGN99816.1	AGN99816.1;PWT63932.1;PWT66978.1;PWT69524.1;QBE46873.1;PWT33044.1;PWT59755.1;UZM89952.1;UXE89648.1;WJK30611.1;WLR80401.1;WP_003666336.1;UYQ75371.1;PWT31840.1;VTZ88543.1;OYS60152.1;OYT01844.1;OCX48361.1;OFB59831.1;OJI10189.1;OPG89113.1;OTA45464.1;OTA46368.1;PTS29308.1;OTA48112.1;OTA51177.1;OTA58774.1;OTA63064.1;OTA63892.1;PWT64900.1;PWT60598.1;OTA74509.1;PWT53358.1;RMX24748.1;RMX28210.1;RNF37760.1…	AGN99816.1 YaaQ [Limosilactobacillus reuteri I5007];PWT63932.1 hypothetical protein DKZ32_02180 [Limosilactobacillus reuteri];PWT66978.1 hypothetical protein DKZ28_03300 [Limosilactobacillus reuteri];PWT69524.1 hypothetical protein DKZ26_02960 [Limosilacto	155	7	7	7	84.8	11.614	2336200	2453400	2394800	3472800	3449100	3460950	0.691949	0.295203
BAG24842.1	BAG24842.1;OTA74503.1;AGN99810.1;AKP00563.1;AMY13786.1;ANU50791.1;CCC04434.1;CUR37522.1;CUR42722.1;CUU13125.1;KRK50995.1;OAV47737.1;OCW63891.1;OCW66166.1;OCW66244.1;OCW68009.1;OCW68924.1;OFB56570.1;OJI10183.1;OPG89119.1;OTA45458.1;OTA46362.1;OTA48118.1;OTA49973.1;OTA51183.1;OTA58989.1;QKT15891.1;OTA72826.1;OTA74646.1;WP_122480743.1;PWT38167.1;UUW68861.1;OTA79423.1;OTA80371.1;OTA86313.1;OTA86491.1…	BAG24842.1 polyphosphate kinase [Limosilactobacillus reuteri subsp. reuteri JCM 1112];OTA74503.1 RNA degradosome polyphosphate kinase [Limosilactobacillus reuteri];AGN99810.1 polyphosphate kinase [Limosilactobacillus reuteri I5007];AKP00563.1 polyphosphate	232	23	23	0	34.2	86.871	1971800	1999800	1985800	2004100	1755000	1879550	1.05653	0.9379
PTS15752.1	PTS15752.1;EGC15519.1;AGR64992.1;AXX74003.1;BAG24844.1;CCC04432.1;CUU13123.1;EDX41874.1;EEI09779.1;OFB56569.1;AKP00565.1;OUL55134.1;KEK15254.1;KGE72939.1;OAV47735.1;OCW63893.1;OCW66164.1;OCW66242.1;OCW68011.1;KEK14680.1;OCW68922.1;PWT35598.1;OYS87414.1;PTV05382.1;PWT63924.1;WP_229407632.1;OYS96866.1;OYS98996.1;OYT01852.1;OYT02309.1;PTS29316.1;OYS85794.1;OYS95894.1;PWT55085.1;PWT33052.1;PWT38166.1…	PTS15752.1 UDP-glucose 4-epimerase GalE [Limosilactobacillus reuteri];EGC15519.1 UDP-glucose 4-epimerase [Limosilactobacillus reuteri MM4-1A];AGR64992.1 UDP-glucose 4-epimerase [Limosilactobacillus reuteri TD1];AXX74003.1 UDP-glucose 4-epimerase GalE [Limo	179	21	21	3	87	36.598	35124000	42632000	38878000	37277000	38687000	37982000	1.02359	0.944555
WP_289218702.1	WP_289218702.1;WP_229288079.1;WP_153701273.1;WP_136001155.1;WP_152704010.1;WP_260234931.1;WP_251672258.1;WP_242079492.1;WP_229304561.1;WP_229288266.1;WP_229282257.1;WLR80391.1;WP_134988585.1;WP_229281298.1;WP_229271107.1;WP_229268296.1;WP_169472717.1;WP_169471559.1;WP_153706260.1;WP_153703742.1;WP_135950759.1;WJK32124.1;OXE59732.1;WP_094502041.1;WP_086142823.1;WP_086118334.1;WP_285142832.1;WP_078…	WP_289218702.1 ribosomal protein S18-alanine N-acetyltransferase [Limosilactobacillus reuteri];WP_229288079.1 ribosomal protein S18-alanine N-acetyltransferase [Limosilactobacillus reuteri];WP_153701273.1 MULTISPECIES: ribosomal protein S18-alanine N-acety	172	1	1	1	15.4	13.761	11124	16121	13622.5	11077	16504	13790.5	0.987818	0.86683
ABQ82613.1	ABQ82613.1;OCW66160.1;OCW68015.1;OCW69213.1;OFB60033.1;OJI10177.1;OTA45306.1;OTA53940.1;OTA81141.1;OTA85620.1;PTS13151.1;PTV05378.1;UAW62857.1;UCN17228.1;UCN18998.1;QDK49177.1;QBE46885.1;PWT69512.1;PWT66866.1;PWT64764.1;PWT63920.1;OCW66238.1;OCW63897.1;QKT15885.1;OAV47322.1;QWS04551.1;RMX28222.1;RNF37747.1;TGB11290.1;TSB18860.1;PWT32967.1;UAW60610.1;PWT30422.1;PTS25697.1;AKP00571.1;AMY13780.1;BAG…	ABQ82613.1 pyrroline-5-carboxylate reductase [Limosilactobacillus reuteri subsp. reuteri];OCW66160.1 pyrroline-5-carboxylate reductase [Limosilactobacillus reuteri];OCW68015.1 pyrroline-5-carboxylate reductase [Limosilactobacillus reuteri];OCW69213.1 pyrro	217	8	8	1	44	26.78	1371400	1381100	1376250	1386400	1436300	1411350	0.97513	0.894804
ABQ82622.1	ABQ82622.1;UGQ33050.1;UZM89932.1;UIN24947.1;WP_065867149.1;WP_003666368.1;WLR80380.1;WLC96181.1;WJK30632.1;UHC31647.1;QLL75462.1;UYQ75392.1;UXE89670.1;UUW68875.1;UPG78426.1;UNL40433.1;UNL37249.1;UIT54287.1;UFK68594.1;TGY60047.1;RMX24768.1;RMX28231.1;TGB11281.1;TGY49254.1;UFK65861.1;UCN18990.1;UCN17220.1;UAW62864.1;UAW60619.1;TSB18869.1;QWS04559.1;OYS95906.1;QPB65696.1;sp|B2G5X6.1|CH10_LIMRJ;sp|A5…	ABQ82622.1 chaperonin Cpn10 [Limosilactobacillus reuteri subsp. reuteri];UGQ33050.1 co-chaperone GroES [Limosilactobacillus reuteri];UZM89932.1 co-chaperone GroES [Limosilactobacillus reuteri];UIN24947.1 co-chaperone GroES [Limosilactobacillus reuteri];WP_	157	9	9	3	67	10.149	15515000	16796000	16155500	14666000	15663000	15164500	1.06535	0.862111
ABQ82626.1	ABQ82626.1;WP_134988598.1;WP_035155042.1;WP_019253666.1;WP_003676285.1;WP_003670481.1;WP_003667429.1;WP_003666372.1;WLR80375.1;VTZ88879.1;WP_152739085.1;UZM89928.1;WP_152744672.1;WP_283581195.1;WP_261296315.1;WP_229283617.1;WP_229271119.1;WP_169473616.1;WP_169471519.1;PUH34002.1;WP_035169619.1;WP_065532648.1;WP_072575130.1;WP_078009907.1;OCW66225.1;OCW66147.1;OCW63910.1;OTA88040.1;OYS85810.1;WP_1…	ABQ82626.1 amino acid/polyamine/organocation transporter, APC superfamily [Limosilactobacillus reuteri subsp. reuteri];WP_134988598.1 APC family permease [Limosilactobacillus reuteri];WP_035155042.1 APC family permease [Limosilactobacillus reuteri];WP_0192	183	9	9	5	19.4	67.623	1806700	1925200	1865950	2115700	1777300	1946500	0.958618	0.858915
PWT35493.1	PWT35493.1;WP_113896742.1;UZM89917.1;WP_079375911.1;WP_035151704.1;WP_016497061.1;WP_003666394.1;WLR80363.1;PWT37815.1;WP_086132382.1;VTZ88855.1;WJK30648.1;ABQ82638.1;QBE46909.1;sp|A5VIG4.1|HPRK_LIMRD;ROV63430.1;PWT66892.1;WP_094502003.1;WP_169470977.1;OTA45428.1;WP_182586196.1;OFB59787.1;KEK14707.1;OCX48395.1;OCW71105.1;OCW67628.1;OCW66345.1;OCW65717.1;OCW61395.1;OAV47388.1;OTA47286.1;OTA78220.1…	PWT35493.1 HPr kinase/phosphorylase [Limosilactobacillus reuteri];WP_113896742.1 HPr(Ser) kinase/phosphatase [Limosilactobacillus reuteri];UZM89917.1 HPr(Ser) kinase/phosphatase [Limosilactobacillus reuteri];WP_079375911.1 HPr(Ser) kinase/phosphatase [Limo	173	15	15	15	59.7	35.487	6256800	5544500	5900650	6799400	5953300	6376350	0.925396	0.810813
ABQ82640.1	ABQ82640.1;OAV47386.1;OTA47548.1;OTA47288.1;OTA45426.1;OPG89048.1;OJI10152.1;OFB59785.1;KRK50319.1;sp|B2G5Z4.1|GPDA_LIMRJ;KEQ21197.1;OTA56173.1;KEK15224.1;EGC15554.1;EEI09829.1;EDX41906.1;ROV63428.1;UAW60632.1;CUR43510.1;UPG78442.1;WP_003667443.1;WP_003666397.1;TSB19870.1;VTZ88851.1;UYQ75408.1;UXE89686.1;UNL40417.1;UZM89915.1;UNL37454.1;UHC31663.1;UGQ33066.1;UCN18973.1;UCN17203.1;UAW62877.1;CUU13…	ABQ82640.1 glycerol 3-phosphate dehydrogenase (NAD(P)+) [Limosilactobacillus reuteri subsp. reuteri];OAV47386.1 glycerol-3-phosphate dehydrogenase [Limosilactobacillus reuteri];OTA47548.1 glycerol-3-phosphate dehydrogenase [Limosilactobacillus reuteri];OTA	104	18	18	2	62.1	36.905	7915200	9140400	8527800	10185000	9660300	9922650	0.859428	0.632551
ABQ82650.1	ABQ82650.1;RNF37711.1;TGY64356.1;PWT44499.1;QLL75489.1;OON61745.1;OPG89056.1;PWT42700.1;PWT59599.1;PWT37827.1;OYS86921.1;PWT31137.1;OTA47297.1;OTA47539.1;OTA48084.1;OTA56163.1;OTA56942.1;OTA59373.1;OTA68963.1;OTA70874.1;AKP00609.1;AMY13744.1;OTA80223.1;PWT41329.1;OTA87682.1;OJI10143.1;OFB59777.1;OAV47376.1;KRK50329.1;AGN99768.1;OTA76126.1;ROV63418.1;RMX28262.1;AWD61807.1;RMX24796.1;UCN17193.1;UCN…	ABQ82650.1 hydrolase of HD superfamily-like protein [Limosilactobacillus reuteri subsp. reuteri];RNF37711.1 HD domain-containing protein [Limosilactobacillus reuteri];TGY64356.1 HD domain-containing protein [Limosilactobacillus reuteri];PWT44499.1 HD domai	175	18	18	18	81.6	24.304	8655700	10003000	9329350	7260300	6609700	6935000	1.34526	0.434666
UXE89701.1	UXE89701.1;WP_172468039.1;WP_003666428.1;WP_003667466.1;TGY49288.1;WP_289218364.1;WP_257496674.1;WP_229283643.1;WP_229271144.1;WP_229267966.1;OYT09987.1;OCW62295.1;WP_162216296.1;WP_153702180.1;WP_124216436.1;WP_065867871.1;WP_035155097.1;WP_003676247.1;WP_003670439.1;TGY64362.1;AWD61814.1;TSB19854.1;UCN17187.1;UCN18957.1;OYS50108.1;UNL40401.1;UIT54322.1;WLR80344.1;WJK30667.1;VTZ88823.1;UZM89900.…	UXE89701.1 DNA-binding protein WhiA [Limosilactobacillus reuteri];WP_172468039.1 DNA-binding protein WhiA [Limosilactobacillus reuteri];WP_003666428.1 DNA-binding protein WhiA [Limosilactobacillus reuteri];WP_003667466.1 DNA-binding protein WhiA [Limosilac	172	9	9	7	33.4	35.813	618300	543760	581030	891000	717470	804235	0.722463	0.351475
ABQ82658.1	ABQ82658.1;ROV63410.1;UHC31680.1;UIN24912.1;UIT54323.1;UNL40400.1;UNL37252.1;WP_003666435.1;WLR80340.1;WJK30670.1;QPB65730.1;VTZ88819.1;UZM89898.1;UYQ75428.1;UXE89704.1;UUW68912.1;UPG78459.1;RMX25371.1;sp|A5VII4.1|CLPP_LIMRD;TSB19853.1;sp|B2G613.1|CLPP_LIMRJ;OUN48802.1;WLC96217.1;UAW60650.1;RMX24805.1;UGQ33083.1;UFK68636.1;UFK65903.1;UCN18955.1;UCN17185.1;UAW62893.1;TGY64364.1;OYS99293.1;QQR15218…	ABQ82658.1 ATP-dependent Clp protease proteolytic subunit ClpP [Limosilactobacillus reuteri subsp. reuteri];ROV63410.1 ATP-dependent Clp protease proteolytic subunit [Limosilactobacillus reuteri];UHC31680.1 ATP-dependent Clp endopeptidase proteolytic subun	155	11	11	2	74.6	21.433	6228200	6418600	6323400	9640900	13101000	11370950	0.556101	0.0596262
AEI57819.1	AEI57819.1;WP_272649243.1;WP_003666444.1;WLR80333.1;WLC96223.1;WJK30675.1;WP_228340492.1;WP_229271147.1;UZM89893.1;WP_229276516.1;WP_257525121.1;QWS04596.1;WP_230212265.1;WP_229308578.1;WP_229285662.1;WP_229280493.1;WP_229278921.1;PWT39226.1;VTZ88566.1;UYQ75433.1;WP_003667477.1;WP_019253270.1;WP_035159750.1;WP_078009104.1;OTA43649.1;OPG88989.1;OYS89152.1;PWT31666.1;WP_229273988.1;PWT36429.1;WP_21…	AEI57819.1 proline-specific permease ProY [Limosilactobacillus reuteri SD2112];WP_272649243.1 amino acid permease [Limosilactobacillus reuteri];WP_003666444.1 amino acid permease [Limosilactobacillus reuteri];WLR80333.1 amino acid permease [Limosilactobaci	181	2	2	2	8.9	50.634	117280	108010	112645	170640	174850	172745	0.652088	0.33175
EGC15583.1	EGC15583.1;WP_094501966.1;WP_229285665.1;WP_289218365.1;WP_273774169.1;WP_261296322.1;WP_257525122.1;WP_229407662.1;WP_229397948.1;WP_229392899.1;WP_229308579.1;WP_229305414.1;WP_229303418.1;WP_228340493.1;WP_219285166.1;WP_229284748.1;WP_229283644.1;WP_229282243.1;WP_229281303.1;WP_229278920.1;WP_229273989.1;WP_229272774.1;WP_229271215.1;WP_228342734.1;WP_228342269.1;QDR73117.1;QBE46934.1;WP_152…	EGC15583.1 chloride transporter, ClC family [Limosilactobacillus reuteri MM4-1A];WP_094501966.1 ClC family H(+)/Cl(-) exchange transporter [Limosilactobacillus reuteri];WP_229285665.1 ClC family H(+)/Cl(-) exchange transporter [Limosilactobacillus reuteri]	221	2	2	2	5.3	58.408	24622	54096	39359	34308	78474	56391	0.697966	0.401383
ABQ82664.1	ABQ82664.1;WP_229271212.1;UPG78470.1;UNL40390.1;UNL37263.1;UIT54333.1;WP_098035236.1;UFK68645.1;UGQ33094.1;WP_169471427.1;UXE89716.1;OUN48793.1;WP_229304427.1;WP_229285668.1;WP_229280494.1;UIN24902.1;UFK65913.1;PUH33065.1;UUW68922.1;UYQ75438.1;OCW66679.1;UHC31691.1;OCW62543.1;OAV46480.1;KRK49601.1;PTM30286.1;OUP88940.1;PTS27121.1;WP_168240182.1;WP_113896724.1;UZM89888.1;WP_079375914.1;WP_07800910…	ABQ82664.1 SsrA-binding protein [Limosilactobacillus reuteri subsp. reuteri];WP_229271212.1 SsrA-binding protein SmpB [Limosilactobacillus reuteri];UPG78470.1 SsrA-binding protein SmpB [Limosilactobacillus reuteri];UNL40390.1 SsrA-binding protein SmpB [Lim	168	6	6	6	45.9	18.262	380480	361360	370920	554640	479450	517045	0.717384	0.431807
ABQ82666.1	ABQ82666.1;KEK15194.1;OJI10123.1;OTA78504.1;OTA82045.1;OTA82088.1;OTA87702.1;OUL54914.1;OXE59671.1;OYS60912.1;OYS61898.1;OYS65973.1;OYS73891.1;OTA47519.1;OTA43884.1;OTA43642.1;AGN99744.1;AKP00631.1;AMY13723.1;ANU50855.1;BAG24908.1;CCC04369.1;CUR36277.1;CUR38364.1;CUR42901.1;OTA79141.1;OYS76330.1;OTA76235.1;OTA75154.1;OTA68920.1;UZM89886.1;WP_152744387.1;WP_267866998.1;WP_003673179.1;EEI09882.1;AG…	ABQ82666.1 Uracil-DNA glycosylase [Limosilactobacillus reuteri subsp. reuteri];KEK15194.1 uracil-DNA glycosylase [Limosilactobacillus reuteri];OJI10123.1 uracil-DNA glycosylase [Limosilactobacillus reuteri];OTA78504.1 uracil-DNA glycosylase [Limosilactobac	189	6	6	6	45.4	26.105	1415200	1111400	1263300	1651300	1534900	1593100	0.792982	0.494324
ABQ82667.1	ABQ82667.1;AXX73936.1;UNL40387.1;QKT15828.1;QLQ62260.1;OYS99281.1;QDR73111.1;OYT01001.1;PWT68365.1;OTA47606.1;OTA48759.1;OTA59394.1;OTA60612.1;OTA62123.1;OTA68919.1;OPG88996.1;OTA75155.1;OTA47518.1;OTA78505.1;OTA82044.1;OTA82089.1;OTA87703.1;OUL54915.1;OYS48179.1;OYS50094.1;OTA76236.1;OON66278.1;OTA79142.1;OJI10122.1;OCX49664.1;AGR63852.1;TGY64376.1;UNL37265.1;UHC31694.1;UPG78473.1;VTZ88574.1;WJK…	ABQ82667.1 phosphotransacetylase [Limosilactobacillus reuteri subsp. reuteri];AXX73936.1 phosphate acetyltransferase [Limosilactobacillus reuteri];UNL40387.1 phosphate acetyltransferase [Limosilactobacillus reuteri];QKT15828.1 phosphate acetyltransferase [	180	22	22	22	82.4	34.699	29612000	36508000	33060000	44692000	46595000	45643500	0.724309	0.302838
ABQ82668.1	ABQ82668.1;PTS14453.1;OCW70298.1;OCW67806.1;AKP00633.1;AMY13721.1;AXX73935.1;BAG24910.1;CUR36279.1;CUR38362.1;CUR42237.1;AGN99742.1;CUR42903.1;EEI09880.1;EGC15591.1;KEK15192.1;KRK49597.1;OAV46476.1;OCW62547.1;OCW65068.1;OCW66683.1;OFB60065.1;OTA75156.1;OTA68918.1;OTA60613.1;PWT29992.1;TGY49303.1;OTA43640.1;OTA43886.1;OTA47517.1;OTA47605.1;OTA48758.1;OTA59395.1;OJI10121.1;OUL54916.1;OPG88997.1;OTA…	ABQ82668.1 protein of unknown function UPF0079 [Limosilactobacillus reuteri subsp. reuteri];PTS14453.1 tRNA (adenosine(37)-N6)-threonylcarbamoyltransferase complex ATPase subunit type 1 TsaE [Limosilactobacillus reuteri];OCW70298.1 tRNA (N6-adenosine(37)-N	180	8	8	8	55.3	16.736	2886100	2760700	2823400	4449300	4122600	4285950	0.658757	0.181344
WP_225420624.1	WP_225420624.1;OTA60615.1;AKP00635.1;AMY13719.1;BAG24912.1;CCC04365.1;CUR36281.1;CUR42905.1;CUU13051.1;EDX41946.1;OTA59397.1;EEI09878.1;PWT57457.1;OAV46474.1;OFB60067.1;OJI10118.1;OPG88999.1;OTA43638.1;OTA43888.1;OTA47515.1;OTA47603.1;AGN99740.1;OTA48756.1;PWT34487.1;PWT58252.1;EGC15593.1;UCN17168.1;OTA76239.1;OTA78508.1;OTA79145.1;OTA82041.1;OTA82092.1;OTA87706.1;PTS14455.1;OTA62120.1;OTA75158.1…	WP_225420624.1 PAS domain-containing protein [Limosilactobacillus reuteri];OTA60615.1 hypothetical protein BHL92_03825 [Limosilactobacillus reuteri];AKP00635.1 hypothetical protein LRIRT_0410 [Limosilactobacillus reuteri];AMY13719.1 hypothetical protein AD	190	4	4	4	41	14.288	190790	113390	152090	294910	274320	284615	0.534371	0.175264
ABQ82671.1	ABQ82671.1;OYS56546.1;OYS60907.1;OYS61903.1;OYS65968.1;OYS67787.1;PWT29611.1;PWT58253.1;WP_229285673.1;WP_229271206.1;WP_216271298.1;WP_187403451.1;WP_134988638.1;WP_134907075.1;WP_094561138.1;UFK65921.1;QDK49108.1;OYS56641.1;PWT34488.1;PWT32250.1;PWT48265.1;AGN99739.1;BAG24913.1;CUR42906.1;OYS48175.1;OYS73886.1;EEI09877.1;EEI64997.1;EGC15594.1;KEK14743.1;OPG89000.1;OUP88933.1;OYS70842.1;OYS50375…	ABQ82671.1 Exonuclease, RNase T and DNA polymerase III [Limosilactobacillus reuteri subsp. reuteri];OYS56546.1 exonuclease [Limosilactobacillus reuteri];OYS60907.1 exonuclease [Limosilactobacillus reuteri];OYS61903.1 exonuclease [Limosilactobacillus reuter	178	7	7	1	52.5	20.677	484200	454290	469245	532290	513210	522750	0.897647	0.724285
ABQ82674.1	ABQ82674.1;OTA48752.1;AKP00639.1;BAG24916.1;CCC04361.1;CUR36285.1;CUR42909.1;CUU13047.1;EEI09874.1;EGC15597.1;KRK49591.1;AMY13715.1;OAV46470.1;OJI10114.1;OPG89003.1;OTA43634.1;OTA45885.1;OTA47511.1;OTA47599.1;PWT63091.1;OFB60071.1;AGN99736.1;PWT39243.1;QBE46947.1;OTA59401.1;OTA76243.1;QDK49105.1;OTA79149.1;OTA82037.1;OTA82096.1;OTA87710.1;PTS14459.1;OTA62116.1;PTS27131.1;PWT34491.1;OTA78512.1;PWT…	ABQ82674.1 RbsD or FucU transport [Limosilactobacillus reuteri subsp. reuteri];OTA48752.1 D-ribose pyranase [Limosilactobacillus reuteri];AKP00639.1 D-ribose pyranase [Limosilactobacillus reuteri];BAG24916.1 ribose transport protein [Limosilactobacillus re	181	6	6	6	48.1	14.548	85652	454790	270221	242240	222080	232160	1.16394	0.887191
CUR38353.1	CUR38353.1;WP_228341858.1;WP_134988643.1;WP_094560326.1;WP_086143240.1;UZM89876.1;WP_085650284.1;WP_003666462.1;WLR80315.1;WLC96241.1;WJK30692.1;VTZ88583.1;ROV62773.1;ABQ82676.1;RMX25350.1;PWT57463.1;PWT52225.1;PWT48260.1;PWT43827.1;PWT34493.1;WP_229271202.1;RMX24826.1;WP_229410523.1;PWT37055.1;UIN24889.1;UHC31703.1;UGQ33106.1;UFK68658.1;UFK65926.1;UCN18932.1;UCN17162.1;PTM27699.1;TSB19143.1;TGY6…	CUR38353.1 Hypothetical protein YbbP, contains nucleotide-binding domain of DisA bacterial checkpoint controller [Limosilactobacillus reuteri subsp. porcinus];WP_228341858.1 diadenylate cyclase CdaA [Limosilactobacillus reuteri];WP_134988643.1 diadenylate	167	5	5	5	28.1	28.471	657760	613200	635480	508280	529590	518935	1.22458	0.649781
PWT34497.1	PWT34497.1;WP_019253915.1;VTZ88589.1;WLC96245.1;WLR80311.1;WP_003666468.1;WP_003667500.1;TSB19139.1;UYQ75453.1;WP_003670417.1;WP_123072582.1;WP_230212271.1;TGY49315.1;TGB12749.1;ROV62769.1;RNF37678.1;WP_094501946.1;UAW60678.1;UPG78486.1;UUW68938.1;OTA48746.1;OTA60625.1;OAV46464.1;OCW62286.1;OCW65056.1;OCW66695.1;OCW67794.1;KEQ21240.1;OCW70286.1;KRK49585.1;OFB60076.1;OON66291.1;UZM89872.1;ABQ82680…	PWT34497.1 hypothetical protein DKZ24_08620 [Limosilactobacillus reuteri];WP_019253915.1 hypothetical protein [Limosilactobacillus reuteri];VTZ88589.1 hypothetical protein LREP572_00374 [Limosilactobacillus reuteri];WLC96245.1 hypothetical protein LDE72_02	163	5	5	5	59.2	12.29	226680	269940	248310	447920	391540	419730	0.591595	0.246533
AMY13708.1	AMY13708.1;PWT48255.1;AGN99728.1;AXX73922.1;BAG24923.1;CCC04354.1;CUR36292.1;CUR38348.1;CUR41573.1;CUR42916.1;CUU13040.1;EEI09867.1;QKT15814.1;EGC15604.1;KRK49584.1;OTA68905.1;OFB60077.1;OJI10107.1;OPG89010.1;OTA43627.1;OTA45764.1;OTA47592.1;OTA48745.1;OTA59408.1;OTA60626.1;KEK15179.1;AKP00646.1;OAV46463.1;OTA64473.1;OTA79156.1;QPB65757.1;PWT40966.1;WP_003667501.1;WP_003676222.1;OTA82030.1;OTA821…	AMY13708.1 acyltransferase [Limosilactobacillus reuteri];PWT48255.1 acetyltransferase [Limosilactobacillus reuteri];AGN99728.1 acyltransferase 3 [Limosilactobacillus reuteri I5007];AXX73922.1 acetyltransferase [Limosilactobacillus reuteri];BAG24923.1 putat	236	11	11	11	21.6	70.141	755550	703370	729460	797450	639310	718380	1.01542	0.980624
WP_122481905.1	WP_122481905.1;OYT05850.1;OTA48737.1;OTA47852.1;OYS70644.1;OTA47584.1;AGN99703.1;AKP00654.1;ANU50878.1;AOZ57036.1;BAG24931.1;CCC04346.1;CUR36300.1;CUR41558.1;CUR42924.1;CUU13032.1;EEI09859.1;EGC15612.1;AMY13700.1;KEQ21248.1;OAV46455.1;OCW70277.1;OCX49704.1;OFB60083.1;OJI10098.1;OPG89018.1;OTA43619.1;OYS58684.1;OYT05684.1;OYT08549.1;OYT03464.1;ABQ82689.1;WP_229274331.1;WP_229283654.1;WP_229287034.…	WP_122481905.1 glucose-6-phosphate isomerase [Limosilactobacillus reuteri];OYT05850.1 glucose-6-phosphate isomerase [Limosilactobacillus reuteri];OTA48737.1 glucose-6-phosphate isomerase [Limosilactobacillus reuteri];OTA47852.1 glucose-6-phosphate isomeras	212	32	32	3	61.7	50.378	39303000	49460000	44381500	45217000	42924000	44070500	1.00706	0.978351
ABQ82693.1	ABQ82693.1;OTA47849.1;WP_134907015.1;WP_102816610.1;WP_094537148.1;WP_094511650.1;WP_094508069.1;WP_085650035.1;WP_035155154.1;WP_019253923.1;WP_019251320.1;WP_003676189.1;WP_003667514.1;WP_003666511.1;WJK30717.1;PWT30528.1;PWT36548.1;VTZ90212.1;QWS04651.1;WP_134988657.1;WP_152701310.1;WP_152726514.1;OTA88047.1;OAV47709.1;OTA44608.1;OPG89021.1;OJI10084.1;OCX49708.1;OCW67781.1;OCW66708.1;OYS89661.…	ABQ82693.1 response regulator receiver protein [Limosilactobacillus reuteri subsp. reuteri];OTA47849.1 two-component system response regulator [Limosilactobacillus reuteri];WP_134907015.1 DNA-binding domain-containing protein [Limosilactobacillus reuteri];	183	6	6	6	31.2	31.663	69924	227190	148557	283600	315130	299365	0.49624	0.133978
ABQ82695.1	ABQ82695.1;AKP00661.1;ANU50883.1;BAG24936.1;EDX41979.1;EEI09901.1;EGC15619.1;UHC31723.1;OCW70265.1;PWT62252.1;OXE59643.1;PTS13164.1;PTS25836.1;PTV05270.1;PWT31760.1;OAV47707.1;PWT33800.1;UGQ33126.1;PWT36546.1;RMX25059.1;QWS04653.1;QQR15178.1;QBE46969.1;PWT68410.1;UPG78502.1;PWT63477.1;PWT57274.1;PWT56873.1;PWT51838.1;PWT43313.1;PWT40062.1;PWT39761.1;KRK46769.1;QPB65772.1;WJK30719.1;WP_003667516.1…	ABQ82695.1 carbamate kinase [Limosilactobacillus reuteri subsp. reuteri];AKP00661.1 carbamate kinase [Limosilactobacillus reuteri];ANU50883.1 carbamate kinase [Limosilactobacillus reuteri];BAG24936.1 carbamate kinase [Limosilactobacillus reuteri subsp. reu	139	21	1	0	75.5	33.008	12356	18276	15316	21711	15880	18795.5	0.814876	0.589361
ABQ82699.1	ABQ82699.1;OTA88053.1;QPB65776.1;QDK49081.1;OUL54947.1;PWT68406.1;OPG89027.1;OTA44602.1;OTA45659.1;OTA47575.1;OTA47843.1;OCW70261.1;OCW66714.1;OJI10078.1;OTA49216.1;OTA70942.1;OTA71275.1;OTA74865.1;OTA77486.1;OTA78799.1;OTA54124.1;OTA55716.1;OTA64913.1;OCW67775.1;OCW65037.1;OTA84116.1;AGR65001.1;QDR73079.1;UCN17125.1;AMY13680.1;UAW62940.1;WP_003667520.1;WP_019253927.1;WP_085650526.1;WP_094511646.…	ABQ82699.1 hypothetical protein Lreu_0430 [Limosilactobacillus reuteri subsp. reuteri];OTA88053.1 copper-binding protein [Limosilactobacillus reuteri];QPB65776.1 cupredoxin domain-containing protein [Limosilactobacillus reuteri];QDK49081.1 cupredoxin domai	162	6	6	0	72.6	10.615	3140800	3436900	3288850	4519600	4284100	4401850	0.747152	0.352308
UXE89777.1	UXE89777.1;QBE46988.1;OAV47848.1;KRK49084.1;EEI09944.1;BAG24950.1;AWD61892.1;UPG78522.1;UYQ75482.1;PTS14440.1;WP_134988665.1;WP_163622545.1;WP_217324570.1;WP_272649096.1;WP_003667539.1;PWT39812.1;OFB60012.1;EGC15642.1;PTS27105.1;TSB18467.1;AKP00683.1;UNL40329.1;UNL37313.1;UHC31744.1;PWT29836.1;UAW62949.1;UAW60707.1;UGQ33147.1;ROV61346.1;QWS05409.1;QPB65791.1;PWT36563.1;ABQ82712.1;PWT58151.1;PWT34…	UXE89777.1 beta-lactamase family protein [Limosilactobacillus reuteri];QBE46988.1 serine hydrolase [Limosilactobacillus reuteri];OAV47848.1 serine hydrolase [Limosilactobacillus reuteri];KRK49084.1 beta-lactamase [Limosilactobacillus reuteri subsp. reuteri	54	6	1	1	28.6	38.305	23994	27584	25789	12757	50454	31605.5	0.815966	0.591144
ABQ82713.1	ABQ82713.1;EEI09943.1;OCW67857.1;AGN99682.1;AKP00684.1;ANU50911.1;AWD61893.1;BAG24951.1;CCC04317.1;CUR37252.1;CUU13000.1;EDX41994.1;EGC15643.1;PWT39813.1;KEK14783.1;KEQ21267.1;KGE73049.1;KRK49083.1;OAV47847.1;OCW62245.1;OCW65014.1;OCW66737.1;OCW67753.1;OJI10060.1;OPG88950.1;PWT34735.1;OTA43843.1;PWT32485.1;RMX25071.1;OTA45841.1;OTA46951.1;OTA47836.1;OTA49193.1;OTA54101.1;OTA55723.1;OTA66214.1;OTA…	ABQ82713.1 arginine deiminase [Limosilactobacillus reuteri subsp. reuteri];EEI09943.1 arginine deiminase [Limosilactobacillus reuteri MM2-3];OCW67857.1 arginine deiminase [Limosilactobacillus reuteri];AGN99682.1 arginine deiminase [Limosilactobacillus reut	201	25	25	25	75.6	46.242	170950000	191260000	181105000	207950000	196910000	202430000	0.894655	0.727504
ABQ82715.1	ABQ82715.1;WP_078009135.1;UNL40326.1;WP_271901203.1;WP_257496765.1;WP_229305496.1;WP_168240190.1;WP_153703770.1;WP_134988666.1;WP_094504071.1;WP_086143124.1;WP_086141491.1;WP_086135969.1;WP_016497016.1;OTA46949.1;WP_003676165.1;WP_003667542.1;WP_003666534.1;WJK30754.1;VTZ89909.1;UZM89842.1;UYQ75485.1;UXE89780.1;UPG78525.1;PWT36566.1;PWT32487.1;UNL37316.1;UHC31747.1;QIZ03867.1;PWT39815.1;UCN18885.…	ABQ82715.1 arginine:ornithine antiporter, APA family [Limosilactobacillus reuteri subsp. reuteri];WP_078009135.1 basic amino acid/polyamine antiporter [Limosilactobacillus reuteri];UNL40326.1 amino acid permease [Limosilactobacillus reuteri];WP_271901203.1	113	2	2	1	6.3	50.988	3484300	3994600	3739450	2561100	2388400	2474750	1.51104	0.322318
UNL37321.1	UNL37321.1;QDK49066.1;PWT63676.1;UFK68715.1;QPB65800.1;PWT64557.1;PWT65810.1;PWT68998.1;QBE46997.1;QDR73051.1;TGY57522.1;QIZ03873.1;RMX25079.1;UFK65983.1;RMX25310.1;RNF37620.1;ROV62956.1;TGB12785.1;PWT58160.1;OYS73773.1;OYT05816.1;OYS70610.1;KEK13765.1;OCW65006.1;OCW66745.1;KEK14790.1;KEQ21274.1;KGE73056.1;KRK49076.1;OAV47839.1;OCW62237.1;OCW67745.1;PWT58990.1;PWT54219.1;OCW67849.1;OCX49741.1;OFB…	UNL37321.1 peptide chain release factor 1, partial [Limosilactobacillus reuteri];QDK49066.1 peptide chain release factor 1 [Limosilactobacillus reuteri];PWT63676.1 peptide chain release factor 1 [Limosilactobacillus reuteri];UFK68715.1 Peptide chain releas	160	35	35	1	72.8	39.407	6727300	7455000	7091150	9631000	9899800	9765400	0.72615	0.306701
OTA87916.1	OTA87916.1;UHC31756.1;PWT32497.1;UNL40316.1;UPG78534.1;UUW68994.1;UXE89790.1;UYQ75494.1;UZM89834.1;UFK65987.1;VTZ91241.1;WP_003676152.1;sp|A5VIQ0.1|UPP_LIMRD;ROV62952.1;ABQ82724.1;WLC96297.1;PWT30559.1;PUH35371.1;OPG88962.1;OTA45852.1;OTA46939.1;OTA47478.1;OTA47824.1;OTA49181.1;OTA54089.1;OON66327.1;PUH35245.1;OJI10048.1;OTA71310.1;OTA75125.1;PWT44111.1;RNF37616.1;TGY47904.1;OTA83001.1;TGY57526.1…	OTA87916.1 uracil phosphoribosyltransferase [Limosilactobacillus reuteri];UHC31756.1 uracil phosphoribosyltransferase [Limosilactobacillus reuteri];PWT32497.1 uracil phosphoribosyltransferase [Limosilactobacillus reuteri];UNL40316.1 uracil phosphoribosyltr	161	15	15	15	79.1	23.317	24776000	27930000	26353000	24484000	21540000	23012000	1.14519	0.717438
UNL37349.1	UNL37349.1;UYQ75501.1;WP_085719696.1;WP_003666564.1;WLR80255.1;WLC96304.1;WJK30771.1;VTZ91227.1;UUW69001.1;UXE89797.1;PWT34754.1;QBE47008.1;PWT36447.1;QQR15132.1;QPB65811.1;QLQ62315.1;WP_257496757.1;PWT32504.1;OTA55742.1;OJI10041.1;OTA49174.1;OTA47818.1;OTA46932.1;OPG88969.1;PWT30566.1;OON66334.1;OFB60003.1;UZM89827.1;OCX49752.1;OCW67838.1;OCW67734.1;OCW66756.1;OYT08504.1;WP_283577852.1;QKT15774.…	UNL37349.1 F0F1 ATP synthase subunit B [Limosilactobacillus reuteri];UYQ75501.1 F0F1 ATP synthase subunit B [Limosilactobacillus reuteri];WP_085719696.1 F0F1 ATP synthase subunit B [Limosilactobacillus reuteri];WP_003666564.1 MULTISPECIES: F0F1 ATP synthas	173	11	11	11	60.6	17.431	7074300	5984200	6529250	7369600	9397800	8383700	0.778803	0.425932
ABQ82732.1	ABQ82732.1;OAV47827.1;OYS61969.1;OYS63369.1;OYS63775.1;OYS69771.1;OYS70598.1;OYS56772.1;OYS71634.1;OYS56901.1;OYS57699.1;AGN99663.1;AXX73867.1;OTA47486.1;BAG24970.1;CCC04298.1;CUR37272.1;CUR43606.1;CUU12981.1;OTA47817.1;EEI09923.1;OYS73761.1;AKP00704.1;OCX49753.1;OYS58638.1;OTA55743.1;OJI10040.1;UPG78542.1;UXE89798.1;UYQ75502.1;UZM89826.1;VTZ91225.1;WLR80254.1;WP_003667559.1;UNL40308.1;WP_0660354…	ABQ82732.1 ATP synthase F1 subcomplex delta subunit [Limosilactobacillus reuteri subsp. reuteri];OAV47827.1 ATP synthase F1 subunit delta [Limosilactobacillus reuteri];OYS61969.1 ATP synthase subunit delta [Limosilactobacillus reuteri];OYS63369.1 F0F1 ATP	176	10	10	10	60	20.468	3223400	2938300	3080850	3567000	4505900	4036450	0.763257	0.389091
ABQ82733.1	ABQ82733.1;OYS58637.1;UHC31765.1;UZM89825.1;UYQ75503.1;UXE89799.1;UUW69003.1;UPG78543.1;UNL40307.1;WP_153702663.1;UIN26774.1;WP_216271733.1;WP_229283679.1;WP_169477916.1;UNL37351.1;UGQ33168.1;PWT36445.1;PWT64544.1;UIT54400.1;VTZ91222.1;OTA44481.1;PWT30568.1;OJI10039.1;OFB60005.1;OCW67836.1;OCW67732.1;OCW66758.1;PUH35236.1;OYS61970.1;WLR80253.1;WP_003666568.1;WLC96306.1;WJK30773.1;WP_153701219.1;W…	ABQ82733.1 ATP synthase F1 subcomplex alpha subunit [Limosilactobacillus reuteri subsp. reuteri];OYS58637.1 ATP synthase subunit alpha [Limosilactobacillus reuteri];UHC31765.1 F0F1 ATP synthase subunit alpha [Limosilactobacillus reuteri];UZM89825.1 F0F1 AT	172	26	26	1	52.7	55.226	30104000	28178000	29141000	31457000	27516000	29486500	0.988283	0.978368
ABQ82734.1	ABQ82734.1;OAV47825.1;TGY47914.1;UXE89800.1;PIN30668.1;OYT07239.1;VTZ91220.1;WP_271901211.1;WP_134988683.1;WP_134906653.1;WP_124216305.1;WP_102816565.1;WP_066035452.1;WP_035155215.1;WP_003672563.1;WP_003666570.1;WLR80252.1;WLC96307.1;WJK30774.1;TGY58265.1;TSB19053.1;UAW60727.1;UNL37352.1;OYS61971.1;OYT05802.1;TGB12799.1;UYQ75504.1;UUW69004.1;UPG78544.1;UNL40306.1;UIT54401.1;UAW62970.1;UIN26773.1;…	ABQ82734.1 ATP synthase F1 subcomplex gamma subunit [Limosilactobacillus reuteri subsp. reuteri];OAV47825.1 F0F1 ATP synthase subunit gamma [Limosilactobacillus reuteri];TGY47914.1 F0F1 ATP synthase subunit gamma [Limosilactobacillus reuteri];UXE89800.1 F0	166	12	12	12	53.5	34.796	6503300	6308500	6405900	6976900	6987100	6982000	0.917488	0.789403
ABQ82735.1	ABQ82735.1;WP_134906652.1;RMX25094.1;RMX25295.1;QKT15770.1;UPG78545.1;UUW69005.1;UXE89801.1;UYQ75505.1;UZM89823.1;VTZ91218.1;WJK30775.1;WLC96308.1;WLR80251.1;WP_003666573.1;WP_085649442.1;WP_153702662.1;QQR15128.1;PWT54234.1;PWT44100.1;PWT49228.1;OAV47824.1;OCW62222.1;OCW64991.1;OCW66760.1;OCW67730.1;OCW67834.1;KGE73071.1;KRK49061.1;OCX49756.1;OON66338.1;OPG88973.1;QWS05387.1;QPB65815.1;OTA46928.…	ABQ82735.1 ATP synthase F1 subcomplex beta subunit [Limosilactobacillus reuteri subsp. reuteri];WP_134906652.1 F0F1 ATP synthase subunit beta [Limosilactobacillus reuteri];RMX25094.1 ATP synthase subunit beta [Limosilactobacillus reuteri];RMX25295.1 ATP sy	165	30	30	30	80.8	51.631	64201000	70296000	67248500	68297000	77140000	72718500	0.924778	0.809142
WP_169472687.1	WP_169472687.1;OTA54077.1;QKT15769.1;OYS71630.1;PWT49227.1;OCW67833.1;OFB60028.1;OJI10036.1;OPG88974.1;OTA44478.1;OTA46927.1;OTA47490.1;CUR43602.1;OTA47813.1;OTA55747.1;QPB65816.1;OTA66238.1;OTA70895.1;OTA71322.1;OTA75137.1;OTA77709.1;OCW66761.1;OCW67729.1;OCW64990.1;OCW62221.1;OAV47823.1;AKP00708.1;AMY13633.1;UAW60729.1;UXE89802.1;AWD61918.1;UYQ75506.1;ABQ82736.1;WLR80250.1;WP_003666575.1;WP_003…	WP_169472687.1 F0F1 ATP synthase subunit epsilon [Limosilactobacillus reuteri];OTA54077.1 F0F1 ATP synthase subunit epsilon [Limosilactobacillus reuteri];QKT15769.1 F0F1 ATP synthase subunit epsilon [Limosilactobacillus reuteri];OYS71630.1 F0F1 ATP synthas	171	5	5	5	47.1	16.743	1363400	1447200	1405300	1392800	1068500	1230650	1.14192	0.78258
ABQ82738.1	ABQ82738.1;UCN17093.1;OTA55749.1;AKP00710.1;ANU50937.1;BAG24975.1;CCC04292.1;CUR37277.1;CUR43601.1;CUU12974.1;EDX42018.1;EEI09917.1;EGC15669.1;AGN99658.1;KEK13748.1;KEQ21292.1;KGE73074.1;OAV47821.1;OJI10034.1;OPG88976.1;OTA44476.1;OTA46925.1;OTA47492.1;OTA47811.1;KEK14808.1;OTA66240.1;OTA75139.1;QDK49048.1;OTA77711.1;UAW62975.1;OTA86471.1;OTA87902.1;OXE59590.1;PTS14413.1;PTS27078.1;PTV05214.1;PWT…	ABQ82738.1 UDP-N-acetylglucosamine 1-carboxyvinyltransferase [Limosilactobacillus reuteri subsp. reuteri];UCN17093.1 UDP-N-acetylglucosamine 1-carboxyvinyltransferase [Limosilactobacillus reuteri];OTA55749.1 UDP-N-acetylglucosamine 1-carboxyvinyltransferas	211	11	11	11	40.6	47.242	1669300	1465800	1567550	1735800	1711700	1723750	0.909384	0.750246
ABQ82739.1	ABQ82739.1;OTA47810.1;UIN26768.1;QPB65819.1;TSB18261.1;QLL75574.1;QLQ62323.1;OYS63376.1;PWT54041.1;OJI10033.1;OON66342.1;OPG88977.1;OTA44475.1;OTA46924.1;OTA47493.1;QDR73031.1;AKP00711.1;OTA49166.1;OTA55750.1;OTA66241.1;OTA70892.1;OTA71325.1;OTA75140.1;OTA79557.1;KRK49058.1;KEQ21293.1;OCX49760.1;KEK14809.1;KEK13747.1;AEI57900.1;UHC31771.1;UGQ33174.1;UCN18862.1;UCN17092.1;UYQ75509.1;UZM89819.1;VTZ…	ABQ82739.1 cell shape determining protein, MreB/Mrl family [Limosilactobacillus reuteri subsp. reuteri];OTA47810.1 rod shape-determining protein [Limosilactobacillus reuteri];UIN26768.1 rod shape-determining protein [Limosilactobacillus reuteri];QPB65819.1	173	20	20	20	62.4	35.48	21247000	19973000	20610000	24031000	20336000	22183500	0.929069	0.820743
OTA80516.1	OTA80516.1;OJI10027.1;AXX73853.1;CCC04285.1;CUR37615.1;CUR38386.1;CUR43252.1;QLQ62329.1;CUU12967.1;KRK47217.1;OAV47961.1;OFB59686.1;PWT62183.1;AKP00718.1;OPG88934.1;OTA47315.1;OTA48392.1;OTA51875.1;OTA52350.1;EEI66550.1;QWS04666.1;QLL75580.1;RNF37595.1;WP_086141947.1;AMY13623.1;OTA90015.1;OTA46982.1;PWT37023.1;OTA77541.1;OTA79131.1;OTA74786.1;UYQ75516.1;OTA90192.1;OUN46270.1;OUP87724.1;PTS13571.1…	OTA80516.1 transcriptional regulator [Limosilactobacillus reuteri];OJI10027.1 transcriptional regulator [Limosilactobacillus reuteri];AXX73853.1 helix-turn-helix domain-containing protein [Limosilactobacillus reuteri];CCC04285.1 hypothetical protein LRATCC	203	9	9	6	35.2	31.948	6297100	5381300	5839200	7776900	8350400	8063650	0.724139	0.302482
PWT37024.1	PWT37024.1;OJI10024.1;QPB65826.1;QBE47024.1;WP_225436821.1;PWT68663.1;PWT64817.1;UIN26757.1;UHC31779.1;UGQ33181.1;UFK68742.1;UFK66011.1;UAW62984.1;UAW60739.1;QWS04667.1;QLQ62876.1;OTA91369.1;UPG78557.1;OTA83372.1;EGC15679.1;OTA51872.1;QQR15118.1;RMX25105.1;RNF37592.1;OUP87725.1;OON66349.1;UNL40293.1;KRK47218.1;OTA87848.1;EEI09962.1;CCC04282.1;WP_229277450.1;EEI66549.1;AXX73849.1;ROV62738.1;ANU509…	PWT37024.1 sugar porter family MFS transporter [Limosilactobacillus reuteri];OJI10024.1 MFS transporter [Limosilactobacillus reuteri];QPB65826.1 sugar porter family MFS transporter [Limosilactobacillus reuteri];QBE47024.1 sugar porter family MFS transporte	167	5	5	5	10.3	51.82	6426700	6616900	6521800	3625500	3585900	3605700	1.80875	0.120602
WP_163622729.1	WP_163622729.1;OCW62209.1;BAG24986.1;CCC04279.1;CUR43224.1;CUU12961.1;PWT34408.1;EDX42028.1;EGC15682.1;KEQ21301.1;KGE73084.1;KRK47221.1;PTV05203.1;OAV47362.1;OCW64978.1;OCW66773.1;EEI09959.1;PWT37027.1;PWT32174.1;PWT40727.1;UAW62987.1;ANU50947.1;OTA77535.1;AMY13617.1;PTM27490.1;ABQ82750.1;OJI10021.1;OTA44087.1;OTA51869.1;OTA83375.1;OTA87845.1;OXE59579.1;OYS67153.1;PTM29503.1;AKP00722.1;PTS13575.1…	WP_163622729.1 L-arabinose isomerase [Limosilactobacillus reuteri];OCW62209.1 L-arabinose isomerase [Limosilactobacillus reuteri];BAG24986.1 L-arabinose isomerase [Limosilactobacillus reuteri subsp. reuteri JCM 1112];CCC04279.1 L-arabinose isomerase [Limos	172	25	25	25	68.8	54.46	49882000	55537000	52709500	38417000	36813000	37615000	1.40129	0.374803
ABQ82754.1	ABQ82754.1;KRK47225.1;UCN18848.1;UNL37371.1;UIT54423.1;UIN26751.1;UHC31786.1;UGQ33188.1;UFK68748.1;UFK66019.1;WLR80229.1;WP_003666602.1;WP_136001643.1;UCN17078.1;UAW62991.1;TSB18932.1;PWT32178.1;UNL40286.1;UUW69024.1;UXE89820.1;OYT06158.1;OCW69526.1;OCW67713.1;OCW66777.1;OCW64974.1;OCW62205.1;OTA68170.1;UAW60747.1;UYQ75524.1;OYT08482.1;UPG78564.1;WLC96325.1;WJK30787.1;VTZ91113.1;UZM89806.1;PWT528…	ABQ82754.1 UspA domain protein [Limosilactobacillus reuteri subsp. reuteri];KRK47225.1 UspA domain-containing protein [Limosilactobacillus reuteri subsp. reuteri];UCN18848.1 universal stress protein [Limosilactobacillus reuteri];UNL37371.1 universal stress	163	15	15	2	85.2	18.017	85352000	90100000	87726000	111330000	90588000	100959000	0.868927	0.658018
ABQ82759.1	ABQ82759.1;OJI10011.1;UNL37376.1;RNF37581.1;UHC31791.1;OYS70572.1;QBE47036.1;OYT08477.1;PWT64829.1;OCW69521.1;OCX49778.1;OFB59675.1;OON66361.1;QIZ03904.1;OPG88927.1;OTA45272.1;OTA77526.1;OTA51376.1;OTA51860.1;OTA57371.1;OTA63007.1;OTA68175.1;OTA72073.1;OCW67708.1;QDR73012.1;QKT15747.1;AGN99635.1;WP_216271337.1;WP_003676105.1;UUW69029.1;UYQ75529.1;UZM89801.1;VTZ91133.1;WLC96330.1;WP_003667581.1;WP…	ABQ82759.1 Glyoxalase/bleomycin resistance protein/dioxygenase [Limosilactobacillus reuteri subsp. reuteri];OJI10011.1 glyoxalase [Limosilactobacillus reuteri];UNL37376.1 VOC family protein [Limosilactobacillus reuteri];RNF37581.1 VOC family protein [Limos	140	5	5	2	45.2	15.166	13450000	15408000	14429000	8814300	11117000	9965650	1.44787	0.330711
ABQ82760.1	ABQ82760.1;OCX49779.1;UIN26743.1;UFK68755.1;WP_107690440.1;WP_134907692.1;WP_152727209.1;PTM29512.1;WP_113896670.1;WP_262866087.1;WP_229285956.1;WP_229271258.1;WP_229270408.1;WP_228340523.1;WP_169473157.1;WP_163622697.1;WP_153702648.1;UHC31792.1;UFK66026.1;UIT54431.1;UNL37377.1;UNL40280.1;WP_003666612.1;OCW67707.1;OCW64968.1;OYS53591.1;PTM27481.1;WP_003672369.1;UGQ33194.1;WP_019252597.1;WLR80223.…	ABQ82760.1 hypothetical protein Lreu_0492 [Limosilactobacillus reuteri subsp. reuteri];OCX49779.1 fructose permease [Limosilactobacillus reuteri];UIN26743.1 fructose permease [Limosilactobacillus reuteri];UFK68755.1 hypothetical protein IVR12_01838 [Limosi	168	4	4	4	15.8	27.759	2436600	2499500	2468050	1609100	1521100	1565100	1.57693	0.272001
AWD61961.1	AWD61961.1;UNL40276.1;WLR80213.1;WLC96336.1;VTZ88347.1;UZM89794.1;UYQ75535.1;UXE89833.1;PTM29025.1;WP_152717627.1;PIN31060.1;PTM27122.1;UIT54434.1;QQR15096.1;QPB65845.1;QLQ62182.1;WP_003666632.1;WP_229270218.1;OTA50023.1;OCW69511.1;OTA45179.1;OPG88913.1;OJI10004.1;OAV47409.1;OFB57809.1;OCX49787.1;OCW67698.1;WP_262866090.1;OCW66792.1;OCW64959.1;OYS63740.1;OYS73726.1;UUW69038.1;UPG78576.1;QLL75592.…	AWD61961.1 30S ribosomal protein S4 [Limosilactobacillus reuteri];UNL40276.1 30S ribosomal protein S4 [Limosilactobacillus reuteri];WLR80213.1 30S ribosomal protein S4 [Limosilactobacillus reuteri];WLC96336.1 30S ribosomal protein S4 [Limosilactobacillus r	167	23	23	23	79.3	23.155	102600000	103540000	103070000	110830000	97036000	103933000	0.991697	0.987249
WP_181388492.1	WP_181388492.1;TGY48586.1;WP_169472645.1;WP_163622443.1;WP_153707361.1;WP_134988706.1;WP_117115018.1;WP_094504099.1;PWT66798.1;WP_285143286.1;WP_085719245.1;UUW69043.1;WP_086131915.1;WP_086141960.1;WP_035167907.1;RMX25131.1;WP_029507907.1;PWT63581.1;WP_003666643.1;WP_169478022.1;WP_289218377.1;WP_181462713.1;OYS73721.1;OON66370.1;OJI09999.1;OFB57811.1;OCX49792.1;OCW69506.1;OCW67693.1;PWT64625.1;W…	WP_181388492.1 cytochrome ubiquinol oxidase subunit I [Limosilactobacillus reuteri];TGY48586.1 cytochrome ubiquinol oxidase subunit I [Limosilactobacillus reuteri];WP_169472645.1 cytochrome ubiquinol oxidase subunit I [Limosilactobacillus reuteri];WP_16362	182	7	7	7	21.6	46.78	4363000	3614200	3988600	6330100	4724000	5527050	0.721651	0.297302
ABQ82780.1	ABQ82780.1;UNL40264.1;UZM89781.1;UIN26728.1;UYQ75547.1;UXE89845.1;UUW69050.1;UPG78588.1;UNL37408.1;WLC96348.1;UIT54447.1;UHC31810.1;WP_273774730.1;OYT04786.1;UFK66045.1;PWT31485.1;WJK30812.1;WLR80199.1;QBE47055.1;OTA71582.1;KRK51442.1;OCX49799.1;OCW69499.1;OCW67686.1;OCW66804.1;OCW64507.1;OTA61757.1;WP_003666650.1;UGQ33212.1;UFK68773.1;VTZ88371.1;OYT04842.1;WP_109975998.1;WP_065867401.1;PUH36203.…	ABQ82780.1 cell shape determining protein, MreB/Mrl family [Limosilactobacillus reuteri subsp. reuteri];UNL40264.1 rod shape-determining protein [Limosilactobacillus reuteri];UZM89781.1 rod shape-determining protein [Limosilactobacillus reuteri];UIN26728.1	163	18	18	18	65.5	34.966	10412000	11232000	10822000	12962000	13711000	13336500	0.811457	0.506967
ABQ82791.1	ABQ82791.1;OCX49810.1;OYS91938.1;OYS86715.1;OTA45098.1;OYS86671.1;OTA88563.1;OTA65593.1;OTA81438.1;OJI09981.1;OAV47432.1;OCW62167.1;OCW64496.1;OCW66815.1;OCW67675.1;OCW69488.1;OFB59820.1;AGN99603.1;OPG88910.1;KEQ19848.1;OTA44436.1;OTA50416.1;OTA51832.1;OTA53649.1;KEK13707.1;OTA61768.1;PWT37956.1;KRK51453.1;KEK16782.1;OTA78558.1;AWD61987.1;OTA75428.1;OYS91159.1;OYS92792.1;OYS96095.1;OYS97932.1;OYS…	ABQ82791.1 RecA protein [Limosilactobacillus reuteri subsp. reuteri];OCX49810.1 recombinase RecA [Limosilactobacillus reuteri];OYS91938.1 DNA recombination/repair protein RecA [Limosilactobacillus reuteri];OYS86715.1 recombinase RecA [Limosilactobacillus r	307	23	23	23	58.3	39.063	18805000	17539000	18172000	30278000	28719000	29498500	0.616031	0.120394
KEQ19855.1	KEQ19855.1;EGC15730.1;CUU12914.1;CUR43046.1;CUR42028.1;CUR38615.1;CCC04234.1;BAG25032.1;AWD61995.1;AKP00770.1;AGR63958.1;AGN99595.1;OFB59815.1;OPG88867.1;OTA45091.1;OUL55041.1;OTA88915.1;OTA88649.1;OTA87119.1;WP_218046585.1;OAV47439.1;WP_180320657.1;OJI09973.1;PWT59130.1;QPB65874.1;QBE47072.1;PWT69369.1;PWT66822.1;PWT64649.1;PWT60323.1;PWT54886.1;PWT31502.1;PWT44460.1;PWT42652.1;PWT40685.1;PWT379…	KEQ19855.1 preprotein translocase subunit YajC [Limosilactobacillus reuteri];EGC15730.1 preprotein translocase, YajC subunit [Limosilactobacillus reuteri MM4-1A];CUU12914.1 preprotein translocase, YajC subunit [Limosilactobacillus reuteri subsp. suis];CUR4	214	6	6	6	40.3	16.9	1815900	2043800	1929850	2203900	3049000	2626450	0.734775	0.375249
ABQ82802.1	ABQ82802.1;WP_003666685.1;PUH36182.1;UZM89759.1;PTV05151.1;UYQ75568.1;UXE89867.1;UUW69071.1;UPG78609.1;UNL40242.1;UNL37438.1;UIN26707.1;UHC31831.1;UGQ33233.1;OUN49314.1;QKT15709.1;PUH35968.1;WJK30833.1;WP_169472628.1;OON66399.1;WP_169478011.1;OFB59812.1;OCX49821.1;OCW69343.1;OCW67664.1;OCW66826.1;OCW64485.1;OCW62156.1;OAV47443.1;PTM29058.1;OXE59526.1;PTS29551.1;WLC96369.1;UIT54469.1;VTZ88801.1;WP…	ABQ82802.1 protein of unknown function DUF965 [Limosilactobacillus reuteri subsp. reuteri];WP_003666685.1 MULTISPECIES: IreB family regulatory phosphoprotein [Limosilactobacillus];PUH36182.1 IreB family regulatory phosphoprotein [Limosilactobacillus reuter	170	5	5	5	42	10.353	5119100	4966000	5042550	5449400	4283600	4866500	1.03618	0.919254
ABQ82803.1	ABQ82803.1;TGB12870.1;UCN17033.1;UAW63036.1;UAW60792.1;TSB20640.1;PTS16263.1;UXE89868.1;UZM89758.1;WP_273780674.1;UFK66069.1;WP_273780421.1;VTZ88800.1;WP_169471821.1;WP_134907876.1;WP_102816802.1;WP_003666687.1;WLR80175.1;UCN18804.1;UYQ75569.1;TGY48615.1;OYT09934.1;OFB59811.1;OCW67663.1;OTA88644.1;OCW64484.1;WJK30834.1;OYT07588.1;PTM27088.1;UGQ33234.1;UFK68795.1;UUW69072.1;UPG78610.1;UNL40241.1;U…	ABQ82803.1 Holliday junction resolvase YqgF [Limosilactobacillus reuteri subsp. reuteri];TGB12870.1 Holliday junction resolvase RuvX [Limosilactobacillus reuteri];UCN17033.1 Holliday junction resolvase RuvX [Limosilactobacillus reuteri];UAW63036.1 Holliday	166	10	10	10	59.9	16.525	2690500	2714300	2702400	3804200	3186700	3495450	0.773119	0.452608
ABQ82804.1	ABQ82804.1;KGE72324.1;OYS55111.1;UIT54471.1;UNL40240.1;WP_065532748.1;WP_003666689.1;WP_219285720.1;WP_134988732.1;WLR80174.1;UUW69073.1;UPG78611.1;WLC96371.1;WJK30835.1;VTZ88799.1;UZM89757.1;UYQ75570.1;UXE89869.1;ROV63688.1;sp|A5VIY0.1|Y536_LIMRD;sp|B2G6F6.1|Y522_LIMRJ;TGB12871.1;UGQ33235.1;OYS55138.1;OYS97919.1;RMX25224.1;RNF37543.1;RMX25161.1;UIN26705.1;UHC31833.1;UFK68796.1;TGY48616.1;UFK6607…	ABQ82804.1 protein of unknown function DUF1292 [Limosilactobacillus reuteri subsp. reuteri];KGE72324.1 hypothetical protein HN00_01605 [Limosilactobacillus reuteri];OYS55111.1 hypothetical protein CBF81_01055 [Limosilactobacillus reuteri];UIT54471.1 DUF129	164	3	3	3	35.7	11.401	7970800	5604800	6787800	7577500	13960000	10768750	0.630324	0.139121
ABQ82820.1	ABQ82820.1;OCW66844.1;OTA48806.1;OTA77000.1;OTA49315.1;OTA51086.1;OTA54263.1;OTA64490.1;OTA66292.1;OTA71113.1;AGN99573.1;CUR43024.1;AGR63980.1;OTA79086.1;CUU12892.1;OCW64467.1;OCW62138.1;OAV47461.1;KRK51482.1;OTA47167.1;OTA44401.1;OPG88889.1;OJI09948.1;OFB57985.1;UHC31849.1;UNL37476.1;UNL40224.1;UPG78627.1;UXE89886.1;UYQ75587.1;VTZ88783.1;WP_003667655.1;WP_109883773.1;UZM89740.1;UGQ33251.1;UAW630…	ABQ82820.1 protein of unknown function DUF28 [Limosilactobacillus reuteri subsp. reuteri];OCW66844.1 transcriptional regulator [Limosilactobacillus reuteri];OTA48806.1 transcriptional regulator [Limosilactobacillus reuteri];OTA77000.1 transcriptional regul	141	16	16	2	74.6	27.161	15778000	21096000	18437000	23208000	28577000	25892500	0.712059	0.27773
ABQ82833.1	ABQ82833.1;UYQ75600.1;UUW69102.1;UPG78640.1;UNL40211.1;UIN26676.1;WP_139561211.1;WP_153703608.1;WP_153706939.1;WP_152698011.1;WP_261296366.1;WP_229288306.1;WP_229283789.1;WP_229271325.1;WP_169473668.1;WP_162216152.1;UNL37489.1;UHC31862.1;PTV05120.1;UXE89899.1;WP_113896617.1;OJI09935.1;UZM89727.1;OCW68597.1;OCW67633.1;OCW66858.1;OCW62125.1;PTS16293.1;WP_003666735.1;WLR80143.1;PTM27758.1;VTZ88769.1…	ABQ82833.1 SNARE associated Golgi protein-related protein [Limosilactobacillus reuteri subsp. reuteri];UYQ75600.1 VTT domain-containing protein [Limosilactobacillus reuteri];UUW69102.1 VTT domain-containing protein [Limosilactobacillus reuteri];UPG78640.1	176	4	4	4	20.5	23.714	572120	476830	524475	645450	435510	540480	0.970387	0.839836
ABQ82834.1	ABQ82834.1;OTA56759.1;OTA68940.1;OTA70953.1;OTA73391.1;OTA75931.1;OTA75936.1;OCW71336.1;OTA81574.1;OCW70234.1;OCW66614.1;AGN99556.1;AGR63996.1;AKP00807.1;AMY13529.1;ANU51037.1;AXX73749.1;BAG25066.1;CCC04048.1;CUR36317.1;CUR43733.1;CUU12876.1;EEI08265.1;OTA66199.1;OTA55179.1;KGE72368.1;OTA52537.1;UPG78642.1;UUW69105.1;UXE89904.1;UYQ75602.1;UZM89724.1;VTZ91523.1;WJK30871.1;WLR80140.1;WP_003666876.1…	ABQ82834.1 hypothetical protein Lreu_0566 [Limosilactobacillus reuteri subsp. reuteri];OTA56759.1 hypothetical protein BHL93_08780 [Limosilactobacillus reuteri];OTA68940.1 hypothetical protein BHL76_09155 [Limosilactobacillus reuteri];OTA70953.1 hypothetic	169	11	11	11	63.8	18.628	8942000	7834500	8388250	9208200	7369600	8288900	1.01199	0.968211
ABQ82848.1	ABQ82848.1;QBE47124.1;WP_260240756.1;WP_229282924.1;WP_229276591.1;AGN99538.1;WP_216271388.1;WP_109897192.1;QDK48951.1;OTA42721.1;OTA72239.1;PWT69731.1;OAV47079.1;OTA51491.1;OTA50466.1;OTA44126.1;WP_086141543.1;WP_109883405.1;UPG78655.1;WP_003674440.1;WP_003668332.1;WP_217324438.1;ROV63806.1;UCN16983.1;RNF37502.1;UCN18754.1;UGQ33281.1;UHC31879.1;UAW60838.1;QPB65925.1;UXE89923.1;UYQ75618.1;UZM8970…	ABQ82848.1 cell division protein FtsK/SpoIIIE [Limosilactobacillus reuteri subsp. reuteri];QBE47124.1 DNA translocase FtsK [Limosilactobacillus reuteri];WP_260240756.1 DNA translocase FtsK [Limosilactobacillus reuteri];WP_229282924.1 DNA translocase FtsK [	241	6	6	6	13.5	85.54	114790	105420	110105	132830	207800	170315	0.646479	0.323497
PWT38513.1	PWT38513.1;OYT04354.1;WP_134988767.1;WP_134906550.1;WP_229281817.1;WP_181462771.1;WP_169471847.1;WP_152742957.1;WP_152737865.1;WP_152702517.1;WP_113896602.1;WJK30892.1;VTZ89958.1;WP_098039501.1;WP_016496967.1;WP_003671810.1;WP_003666755.1;WLR80120.1;WLC96427.1;WP_229308744.1;UZM89703.1;UXE89928.1;UIN26643.1;UHC31884.1;UGQ33285.1;UUW69125.1;UPG78660.1;UNL40194.1;UNL37504.1;UIT54533.1;UFK67598.1;TS…	PWT38513.1 cell division protein FtsL [Limosilactobacillus reuteri];OYT04354.1 cell division protein FtsL [Limosilactobacillus reuteri];WP_134988767.1 cell division protein FtsL [Limosilactobacillus reuteri];WP_134906550.1 cell division protein FtsL [Limos	163	1	1	1	16.7	13.393	50084	39666	44875	50142	63308	56725	0.791097	0.550498
ABQ82856.1	ABQ82856.1;OTA71564.1;OTA75712.1;OTA79819.1;OTA81483.1;OTA42871.1;PTS17150.1;UAW63089.1;UCN18746.1;PTS31442.1;TSB18999.1;TGB10768.1;sp|B2G6K4.1|MURD_LIMRJ;sp|A5VJ32.1|MURD_LIMRD;ROV63814.1;RMX27635.1;QWS04819.1;QPB65933.1;QDK48943.1;OTA72232.1;OTA60901.1;OTA93117.1;OTA56129.1;AGN99530.1;AKP00830.1;AMY13506.1;BAG25086.1;CCC03103.1;CUR36346.1;CUU12855.1;EEI08560.1;EGC15435.1;KRK52184.1;OAV47072.1;U…	ABQ82856.1 UDP-N-acetylmuramoylalanine--D-glutamate ligase [Limosilactobacillus reuteri subsp. reuteri];OTA71564.1 UDP-N-acetylmuramoyl-L-alanine--D-glutamate ligase [Limosilactobacillus reuteri];OTA75712.1 UDP-N-acetylmuramoyl-L-alanine--D-glutamate ligas	217	25	25	25	57.2	50.332	7971800	7379700	7675750	10924000	11615000	11269500	0.681108	0.219107
ABQ82859.1	ABQ82859.1;CCC03100.1;PWT41766.1;OTA43341.1;OTA44136.1;OTA50456.1;OTA51481.1;OTA56126.1;OTA60904.1;OJI09908.1;OTA65578.1;OPG88809.1;OTA72229.1;OTA78637.1;OTA79816.1;OTA81480.1;OTA88129.1;OTA93120.1;OUL54760.1;OTA71561.1;OCX48911.1;OTA75715.1;OAV47069.1;KRK52187.1;AEI58044.1;AGR64023.1;AKP00833.1;AMY13503.1;ANU51059.1;OON65022.1;UCN16972.1;UCN18743.1;UNL37511.1;WP_153704961.1;WP_229277149.1;WP_229…	ABQ82859.1 cell division protein FtsA [Limosilactobacillus reuteri subsp. reuteri];CCC03100.1 cell division protein FtsA [Limosilactobacillus reuteri subsp. suis];PWT41766.1 cell division protein FtsA [Limosilactobacillus reuteri];OTA43341.1 cell division	181	18	18	18	52.5	50.485	5265800	4990600	5128200	4780700	5917600	5349150	0.958694	0.900326
ABQ82860.1	ABQ82860.1;OTA60905.1;PWT38520.1;PWT43228.1;PWT33416.1;PWT31324.1;PWT67194.1;PTS31446.1;OJI09907.1;OPG88810.1;OTA42875.1;OTA43342.1;OTA44137.1;OTA50455.1;OFB59958.1;OTA51480.1;PTV03751.1;EDX42134.1;OTA75716.1;OTA78638.1;OTA56125.1;OTA79815.1;OAV47068.1;KEQ20648.1;AGN99526.1;AKP00834.1;AMY13502.1;AXX73721.1;BAG25090.1;CCC03099.1;KRK52188.1;CUR36342.1;PWT41767.1;WP_003666768.1;WLR80113.1;VTZ92959.1…	ABQ82860.1 cell division protein FtsZ [Limosilactobacillus reuteri subsp. reuteri];OTA60905.1 cell division protein FtsZ [Limosilactobacillus reuteri];PWT38520.1 cell division protein FtsZ [Limosilactobacillus reuteri];PWT43228.1 cell division protein FtsZ	168	27	27	27	84.1	44.45	29000000	33495000	31247500	30556000	31209000	30882500	1.01182	0.968553
RNF37482.1	RNF37482.1;OTA81471.1;OTA43350.1;OTA44145.1;OTA50447.1;OTA51472.1;OTA56117.1;OTA60913.1;OTA65569.1;OTA71552.1;OTA72220.1;OTA75724.1;OTA78646.1;OTA79807.1;OTA93129.1;AGN99517.1;OUL54769.1;OCW69416.1;OCW65535.1;OFB59716.1;OCW64420.1;AGR64032.1;AKP00843.1;AMY13494.1;ANU51068.1;AWD62075.1;BAG25098.1;CCC03090.1;OTA42883.1;OPG88818.1;RMX26295.1;PTV03759.1;WP_134988783.1;TSB19277.1;WP_035156037.1;WP_019…	RNF37482.1 5-methylthioadenosine/adenosylhomocysteine nucleosidase [Limosilactobacillus reuteri];OTA81471.1 5-methylthioadenosine/S-adenosylhomocysteine nucleosidase [Limosilactobacillus reuteri];OTA43350.1 5-methylthioadenosine/S-adenosylhomocysteine n	182	10	10	10	61.5	24.687	5115900	6072300	5594100	7007600	9000700	8004150	0.6989	0.251937
ABQ82872.1	ABQ82872.1;OYS81572.1;OPG88821.1;OJI09896.1;OFB59714.1;OCX48923.1;OCW69413.1;QQR14990.1;RMX27620.1;AGR64035.1;OYS71505.1;sp|A5VJ48.1|MNMA_LIMRD;UIN26626.1;UZM89684.1;ROV63829.1;UYQ75641.1;OTA42886.1;OTA43353.1;OTA44148.1;OTA81468.1;OTA50444.1;OTA56114.1;OTA60916.1;OTA65566.1;OTA71549.1;OTA72217.1;OTA75727.1;OTA78649.1;OCW64423.1;OCW62920.1;OCW68454.1;OAV47057.1;KRK52200.1;UXE89947.1;UUW69144.1;UP…	ABQ82872.1 tRNA (5-methylaminomethyl-2-thiouridylate)-methyltransferase [Limosilactobacillus reuteri subsp. reuteri];OYS81572.1 tRNA 2-thiouridine(34) synthase MnmA [Limosilactobacillus reuteri];OPG88821.1 tRNA 2-thiouridine(34) synthase MnmA [Limosilactob	188	24	24	24	72.4	42.769	15069000	16339000	15704000	11565000	11364000	11464500	1.36979	0.407496
BAG25103.1	BAG25103.1;WP_019252639.1;WP_168240239.1;WP_163621781.1;WP_153704966.1;WP_152742952.1;WP_152726237.1;WP_132329251.1;WP_078009594.1;ROV63831.1;WP_003666783.1;PWT43241.1;WP_003668305.1;WLC96448.1;QIZ04013.1;QDR72846.1;RNF37477.1;RMX27618.1;WP_229306222.1;WP_013923991.1;QWS04837.1;OTA50442.1;OTA75729.1;OTA65564.1;OON65009.1;OUP90068.1;OTA60918.1;OTA56112.1;OTA51467.1;OTA44150.1;PWT38533.1;OTA43355.1…	BAG25103.1 conserved hypothetical protein [Limosilactobacillus reuteri subsp. reuteri JCM 1112];WP_019252639.1 tetratricopeptide repeat protein [Limosilactobacillus reuteri];WP_168240239.1 tetratricopeptide repeat protein [Limosilactobacillus reuteri];WP_1	190	13	13	13	53.5	26.479	5211100	6120600	5665850	8617400	7777900	8197650	0.691155	0.237352
ABQ82888.1	ABQ82888.1;PUH34746.1;AGR64051.1;OCX48938.1;WLR80085.1;OFB60145.1;OJI09876.1;OON60235.1;OPG88757.1;OTA43061.1;PWT30757.1;OCW63595.1;UGQ33320.1;UZM89669.1;UHC31919.1;UIN26609.1;UIT54570.1;UNL40158.1;UPG78695.1;UUW69161.1;OCW70929.1;OTA44991.1;OUN49726.1;AMY13472.1;PIN30414.1;PWT38548.1;CCC03070.1;PTM28421.1;OTA89463.1;OCW64323.1;OTA47985.1;OAV47039.1;AXX73693.1;OCW63183.1;BAG25118.1;PUH34933.1;OCW…	ABQ82888.1 hypothetical protein Lreu_0623 [Limosilactobacillus reuteri subsp. reuteri];PUH34746.1 hypothetical protein DB324_04950 [Limosilactobacillus reuteri];AGR64051.1 hypothetical protein N134_03430 [Limosilactobacillus reuteri TD1];OCX48938.1 hypothe	178	5	5	5	58.6	13.7	412430	462700	437565	616840	307280	462060	0.946987	0.803134
WP_169471031.1	WP_169471031.1;QLQ62350.1;QQR14972.1;QDK48905.1;RNF37458.1;UYQ75660.1;PWT44961.1;UZM89666.1;WLC96466.1;WJK30929.1;OYS92382.1;WP_003668273.1;WP_019254057.1;WP_035168118.1;VTZ89656.1;PWT41799.1;OYS92434.1;PWT35816.1;OCW70926.1;OCX48941.1;OFB56489.1;OJI09873.1;OPG88760.1;OCW63592.1;OTA43064.1;OCW68617.1;OTA48712.1;OTA50552.1;OTA54239.1;OTA60938.1;OTA71340.1;QPB65968.1;QLL75722.1;OTA44988.1;QKT15618.…	WP_169471031.1 hypothetical protein [Limosilactobacillus reuteri];QLQ62350.1 hypothetical protein HHK02_03315 [Limosilactobacillus reuteri];QQR14972.1 hypothetical protein I5Q80_01580 [Limosilactobacillus reuteri];QDK48905.1 hypothetical protein DPH67_0729	164	3	3	3	48.1	9.0538	388570	257210	322890	185710	184260	184985	1.74549	0.37604
BAG25124.1	BAG25124.1;OYS87156.1;AKP00872.1;AMY13464.1;CUR36818.1;CUR43366.1;CUU12809.1;EEI08602.1;KRK52226.1;OTA60989.1;AGN99484.1;OAV47031.1;OPG88765.1;OTA43986.1;OTA44983.1;OTA48717.1;OTA48933.1;OTA50547.1;OTA54244.1;OFB56493.1;OJI09867.1;OTA60943.1;OYS90466.1;OYS92525.1;OTA75754.1;CCC03062.1;OYS97836.1;OTA78676.1;OTA79772.1;OTA81520.1;OTA86115.1;OTA89455.1;OYS44474.1;OYS47374.1;OTA71448.1;OYS49589.1;OYS…	BAG25124.1 pyruvate dehydrogenase complex E1 component alpha subunit [Limosilactobacillus reuteri subsp. reuteri JCM 1112];OYS87156.1 pyruvate dehydrogenase (acetyl-transferring) E1 component subunit alpha [Limosilactobacillus reuteri];AKP00872.1 pyruvate	182	31	31	31	74.1	41.361	105980000	108300000	107140000	92159000	88107000	90133000	1.18869	0.646245
ABQ82897.1	ABQ82897.1;PWT65575.1;BAG25125.1;EEI08603.1;EGC15392.1;KRK52227.1;OAV47030.1;PTS17190.1;AKP00873.1;PTS31482.1;PWT35822.1;PWT38557.1;PWT41805.1;PWT43264.1;PWT44967.1;PWT55337.1;AWD62106.1;PWT33452.1;PWT61115.1;WP_003668267.1;UXE89973.1;UYQ75666.1;WP_134988807.1;PWT67230.1;PWT69779.1;UPG78704.1;UNL40149.1;UHC31928.1;UGQ33329.1;UAW63129.1;TSB19100.1;QPB65974.1;QBE47172.1;PWT60669.1;PWT30766.1;WP_094…	ABQ82897.1 Transketolase domain protein [Limosilactobacillus reuteri subsp. reuteri];PWT65575.1 alpha-ketoacid dehydrogenase subunit beta [Limosilactobacillus reuteri];BAG25125.1 pyruvate dehydrogenase complex E1 component beta subunit [Limosilactobacillus	177	19	19	16	79.4	35.243	88883000	94957000	91920000	75561000	97355000	86458000	1.06318	0.866296
ABQ82906.1	ABQ82906.1;UPG78713.1;WP_003668252.1;WLC96481.1;VTZ89686.1;UZM89651.1;UYQ75675.1;UUW69179.1;UNL40140.1;QIZ04046.1;PTM29896.1;PIN30396.1;UIT54591.1;QLQ62335.1;PTM28403.1;UHC31937.1;WP_229276609.1;WP_229279969.1;WP_229407427.1;UNL37553.1;OYS62833.1;OYT04405.1;OCW64305.1;OCW68632.1;OCW70911.1;OCX48956.1;OFB60191.1;OAV47021.1;OJI09857.1;OPG88775.1;OTA43996.1;OTA44973.1;OTA48923.1;QKT15603.1;QDR72815.…	ABQ82906.1 Phosphopantetheine adenylyltransferase [Limosilactobacillus reuteri subsp. reuteri];UPG78713.1 pantetheine-phosphate adenylyltransferase [Limosilactobacillus reuteri];WP_003668252.1 MULTISPECIES: pantetheine-phosphate adenylyltransferase [Limosi	166	9	9	9	69.4	19.361	1148000	1621500	1384750	1561800	2158900	1860350	0.744349	0.394119
ABQ82916.1	ABQ82916.1;VTZ89704.1;TGY48900.1;UIN26578.1;WP_003666836.1;WLR80056.1;WLC96491.1;WJK30954.1;OYS94855.1;UYQ75685.1;OYS73248.1;UXE89992.1;UUW69189.1;UPG78723.1;UNL40130.1;UNL37562.1;UIT54600.1;QQR14945.1;UHC31947.1;TGB09501.1;QWS04878.1;RMX26343.1;UZM89639.1;UGQ33348.1;UFK66190.1;UCN18684.1;UCN16913.1;UAW63148.1;UAW60904.1;TSB18566.1;TGY58686.1;UFK67540.1;sp|B2G6R2.1|EFTU_LIMRJ;sp|A5VJ92.1|EFTU_LIM…	ABQ82916.1 translation elongation factor 1A (EF-1A/EF-Tu) [Limosilactobacillus reuteri subsp. reuteri];VTZ89704.1 Elongation factor Tu [Limosilactobacillus reuteri];TGY48900.1 elongation factor Tu [Limosilactobacillus reuteri];UIN26578.1 elongation factor	157	42	42	0	85.1	43.432	514810000	510920000	512865000	678810000	750500000	714655000	0.71764	0.28904
WP_094532446.1	WP_094532446.1;PTM28392.1;WP_153702576.1;WP_265486253.1;WP_251939358.1;PWT55357.1;WP_153704595.1;WP_242079463.1;PWT44987.1;UAW63149.1;TSB18567.1;TGY58685.1;TGY48901.1;sp|B2G6R3.1|TIG_LIMRJ;sp|A5VJ93.1|TIG_LIMRD;ROV63875.1;RNF37433.1;OYS88716.1;OCW70900.1;OTA79195.1;OCX48967.1;OTA75774.1;OTA73408.1;OTA72584.1;OTA63028.1;OTA60963.1;OTA55352.1;OTA86095.1;OTA52179.1;OTA48913.1;OTA44963.1;OTA43252.1;O…	WP_094532446.1 trigger factor [Limosilactobacillus reuteri];PTM28392.1 trigger factor [Limosilactobacillus reuteri];WP_153702576.1 trigger factor [Limosilactobacillus reuteri];WP_265486253.1 trigger factor [Limosilactobacillus reuteri];WP_251939358.1 trigg	191	36	36	36	70.2	49.25	63303000	78886000	71094500	85615000	99872000	92743500	0.766571	0.396839
ABQ82919.1	ABQ82919.1;UUW69192.1;WP_124215998.1;WP_003668240.1;WLR80052.1;WLC96494.1;UZM89636.1;UYQ75688.1;UXE89995.1;WP_169471164.1;PWT43286.1;PWT38579.1;UNL40127.1;OYS64365.1;PWT69801.1;PWT67252.1;PWT65597.1;UPG78726.1;WP_229276611.1;OTA72582.1;WP_229279994.1;OTA49494.1;OCW70898.1;CUR36795.1;OCW64292.1;OTA48911.1;OTA44961.1;OON61782.1;OJI09845.1;OFB58654.1;OCX48969.1;PWT29972.1;OYS64967.1;PWT35844.1;WP_15…	ABQ82919.1 small GTP-binding protein [Limosilactobacillus reuteri subsp. reuteri];UUW69192.1 ribosome biogenesis GTP-binding protein YihA/YsxC [Limosilactobacillus reuteri];WP_124215998.1 ribosome biogenesis GTP-binding protein YihA/YsxC [Limosilactobacill	174	15	15	15	74	22.641	6540000	7421800	6980900	6480400	8006400	7243400	0.96376	0.913809
OYT09034.1	OYT09034.1;OON61781.1;ROV63878.1;RNF37430.1;UNL37566.1;UNL40126.1;RMX26347.1;UUW69193.1;UAW63151.1;WP_153707523.1;UZM89635.1;WJK30958.1;WLC96495.1;WLR80051.1;WP_003674350.1;WP_134988826.1;WP_152700188.1;PIN29810.1;TGY48904.1;TGY58682.1;UIT54604.1;OCX48970.1;OCW68646.1;OYS87494.1;OYS66128.1;WP_153702575.1;TSB18570.1;UIN26574.1;ABQ82920.1;UHC31951.1;UGQ33352.1;UCN18671.1;UCN16900.1;UAW60908.1;UPG78…	OYT09034.1 nucleotide pyrophosphohydrolase [Limosilactobacillus reuteri];OON61781.1 nucleotide pyrophosphohydrolase [Limosilactobacillus reuteri];ROV63878.1 nucleotide pyrophosphohydrolase [Limosilactobacillus reuteri];RNF37430.1 nucleotide pyrophosphohydr	157	2	2	2	39.4	11.475	130050	161610	145830	117830	124430	121130	1.20391	0.838512
ABQ82942.1	ABQ82942.1;WJK30988.1;UAW63162.1;UAW60985.1;OYS62359.1;UYQ75700.1;VTZ89719.1;WP_229303428.1;WLC96507.1;WP_094503884.1;UCN18660.1;WP_087214928.1;WP_003674334.1;WP_003668202.1;WP_003666853.1;WLR79966.1;TSB18899.1;sp|B2G6T4.1|LEXA_LIMRJ;UCN16889.1;UFK66223.1;OCW69746.1;UXE90085.1;OCW62997.1;OYT02752.1;OYS64381.1;OYT07293.1;TGY48914.1;TGY64023.1;TGB09527.1;UUW69204.1;UFK67506.1;UPG78754.1;UNL40115.1;…	ABQ82942.1 SOS-response transcriptional repressor, LexA [Limosilactobacillus reuteri subsp. reuteri];WJK30988.1 transcriptional repressor LexA [Limosilactobacillus reuteri];UAW63162.1 transcriptional repressor LexA [Limosilactobacillus reuteri];UAW60985.1	164	8	8	8	47.1	23.184	1216500	1033000	1124750	1541300	1503400	1522350	0.738825	0.383191
AEI58140.1	AEI58140.1;OCW69745.1;EEI65149.1;EGC15344.1;RMX27545.1;QQR14929.1;AGR64098.1;OCW70114.1;OJI09833.1;OON66695.1;OPG88712.1;OTA43279.1;OTA78710.1;OTA48313.1;AMY13419.1;OTA51308.1;OTA55366.1;OTA59436.1;OTA65536.1;OTA72555.1;OTA73437.1;OTA43942.1;OTA44949.1;OTA79224.1;OCW62477.1;AGN99438.1;EEI08539.1;ABQ82943.1;VTZ89720.1;WLC96508.1;UIT54635.1;TSB18900.1;UHC31974.1;UGQ33375.1;UFK67505.1;UCN18659.1;UFK…	AEI58140.1 hypothetical protein HMPREF0538_21933 [Limosilactobacillus reuteri SD2112];OCW69745.1 hypothetical protein BBP14_02930 [Limosilactobacillus reuteri];EEI65149.1 hypothetical protein HMPREF0534_1553 [Limosilactobacillus reuteri CF48-3A];EGC15344.1	161	6	6	6	41.9	10.422	1706500	1788600	1747550	1893200	1948800	1921000	0.909708	0.750968
UAW63164.1	UAW63164.1;CUR40965.1;AWD62157.1;PWT59781.1;AXX73643.1;BAG25168.1;CUR36781.1;PTM28691.1;CUR39033.1;CUR43329.1;AEI58141.1;EDX42208.1;AKP00919.1;EEI65148.1;EGC15343.1;UCN16887.1;PIN31212.1;UAW60987.1;AGR64099.1;OYS73297.1;CCC03026.1;WP_003666855.1;KGE70095.1;UNL40113.1;UFK66225.1;VTZ89721.1;UZM89622.1;UYQ75702.1;UXE90087.1;UUW69206.1;UIT54636.1;PWT54246.1;AGN99437.1;UIN26542.1;UHC31975.1;UPG78756.1…	UAW63164.1 YneF family protein [Limosilactobacillus reuteri];CUR40965.1 FIG00742188: hypothetical protein [Limosilactobacillus reuteri];AWD62157.1 hypothetical protein LWHH1689_0839 [Limosilactobacillus reuteri];PWT59781.1 YneF family protein [Limosilactob	156	5	5	5	53.3	8.6646	3942300	3954800	3948550	3864800	3160400	3512600	1.12411	0.753893
ABQ82949.1	ABQ82949.1;WJK30995.1;PWT33492.1;PTV03938.1;UPG78761.1;WP_229283863.1;WP_003666860.1;WLR79959.1;UYQ75707.1;PWT68578.1;VTZ89726.1;UUW69211.1;PWT35158.1;QDR72711.1;UHC31980.1;QDK48860.1;UZM89617.1;UXE90092.1;PTS17248.1;OYS56960.1;OCW64677.1;OCW70109.1;OCX50199.1;OFB57517.1;OJI09828.1;OCW62482.1;OPG88717.1;OTA44757.1;OTA48308.1;OTA51313.1;OTA55371.1;OTA59431.1;PTS31540.1;QBE47225.1;PWT66473.1;OTA432…	ABQ82949.1 SSU ribosomal protein S2P [Limosilactobacillus reuteri subsp. reuteri];WJK30995.1 30S ribosomal protein S2 [Limosilactobacillus reuteri];PWT33492.1 30S ribosomal protein S2 [Limosilactobacillus reuteri];PTV03938.1 30S ribosomal protein S2 [Limos	168	21	21	21	77.9	29.657	94040000	93257000	93648500	118130000	109410000	113770000	0.823139	0.536956
ABQ82950.1	ABQ82950.1;QBE47226.1;QDR72710.1;QIZ04079.1;QKT15570.1;QPB66028.1;QWS04935.1;PWT41005.1;PWT68577.1;WP_229283864.1;PWT40822.1;OYS77470.1;OYS97795.1;OCW70108.1;OCX50198.1;OFB57516.1;OJI09827.1;OPG88718.1;OTA43285.1;OTA44756.1;CUU12766.1;OTA44943.1;OTA51314.1;OTA55372.1;OTA59430.1;OTA65542.1;OTA72549.1;OTA73443.1;OTA78716.1;OCW64676.1;OCW69739.1;QDK48859.1;PWT64844.1;OCW62483.1;UNL36825.1;TGY48922.1…	ABQ82950.1 translation elongation factor Ts (EF-Ts) [Limosilactobacillus reuteri subsp. reuteri];QBE47226.1 elongation factor Ts [Limosilactobacillus reuteri];QDR72710.1 elongation factor Ts [Limosilactobacillus reuteri];QIZ04079.1 elongation factor Ts [Li	173	32	32	32	86.6	31.962	58307000	68780000	63543500	80723000	78005000	79364000	0.800659	0.47968
KRK52280.1	KRK52280.1;EGC15336.1;UHC31982.1;UIN26535.1;UIT54643.1;UNL40106.1;PWT35156.1;RMX27537.1;PWT36387.1;QPB66029.1;OAV46978.1;OCW62484.1;OCW62989.1;OCW64675.1;OCW69738.1;OCW70107.1;KEQ20561.1;OCX50197.1;OON66688.1;OPG88741.1;OTA43286.1;OTA44755.1;OTA44942.1;OTA48306.1;OTA51315.1;OFB57515.1;OTA55373.1;KGE70089.1;OTA59429.1;UGQ33383.1;UFK67498.1;UFK66232.1;WP_272649085.1;UYQ75709.1;UZM89615.1;VTZ89728.1…	KRK52280.1 uridylate kinase [Limosilactobacillus reuteri subsp. reuteri];EGC15336.1 UMP kinase [Limosilactobacillus reuteri MM4-1A];UHC31982.1 UMP kinase [Limosilactobacillus reuteri];UIN26535.1 UMP kinase [Limosilactobacillus reuteri];UIT54643.1 UMP kinas	166	13	13	7	62.5	27.716	12429000	12323000	12376000	18207000	15609000	16908000	0.731961	0.319038
WP_285142337.1	WP_285142337.1;WP_273774099.1;WP_153702557.1;WP_152711706.1;WP_261296414.1;WP_229411578.1;WP_229394248.1;WP_229285005.1;WP_229276622.1;WP_229272184.1;WP_169471056.1;WP_152697288.1;WP_085649699.1;WP_065532814.1;WP_135950938.1;WP_134988844.1;WP_132140093.1;WP_102816392.1;WP_094508691.1;WP_087214919.1;WP_086142607.1;WP_035157863.1;WP_019254162.1;WP_019251788.1;VTZ89731.1;UZM89613.1;WP_016496933.1;WP…	WP_285142337.1 phosphatidate cytidylyltransferase [Limosilactobacillus reuteri];WP_273774099.1 phosphatidate cytidylyltransferase [Limosilactobacillus reuteri];WP_153702557.1 phosphatidate cytidylyltransferase [Limosilactobacillus reuteri];WP_152711706.1 p	179	1	1	1	4.2	28.976	260660	226980	243820	373650	266560	320105	0.761688	0.502696
UAW61000.1	UAW61000.1;QPB66037.1;UNL40093.1;UNL37582.1;AGN99424.1;BAG25184.1;QQR14915.1;CUR36767.1;CUR38875.1;CUR41103.1;CUR43315.1;CUU12758.1;QDR72703.1;WP_152697290.1;UUW69219.1;UHC31990.1;WP_143447368.1;sp|B2G6V2.1|RIMP_LIMRJ;TSB20026.1;AKP00935.1;UAW63179.1;UCN16874.1;UCN20147.1;UGQ33390.1;ABQ82960.1;sp|A5VJD6.1|RIMP_LIMRD;UPG78771.1;CCC03012.1;WP_003674323.1;UXE90102.1;UYQ75715.1;UZM89609.1;VTZ89735.1;…	UAW61000.1 ribosome maturation factor RimP [Limosilactobacillus reuteri];QPB66037.1 ribosome maturation factor RimP [Limosilactobacillus reuteri];UNL40093.1 ribosome maturation factor RimP [Limosilactobacillus reuteri];UNL37582.1 ribosome maturation factor	171	5	5	5	33.1	18.213	996820	856840	926830	1294300	1886100	1590200	0.582839	0.132519
UFK66241.1	UFK66241.1;PWT31742.1;PWT32332.1;PWT68820.1;QBE47235.1;CUU12756.1;UUW69221.1;UXE90104.1;UPG78773.1;PWT39851.1;UYQ75717.1;WJK31006.1;WLC96525.1;WLR79949.1;WP_003668183.1;UZM89607.1;PWT37359.1;OAV47888.1;PUH36075.1;OTA59421.1;KRK50075.1;OTA51323.1;OTA44747.1;OTA43295.1;OPG88726.1;OON66679.1;OJI09818.1;OFB56408.1;OYS66085.1;OTA44934.1;OCW70099.1;OCW62981.1;QPB66039.1;QKT15562.1;QIZ04089.1;QDR72701.1…	UFK66241.1 hypothetical protein IU404_01682 [Limosilactobacillus reuteri];PWT31742.1 DUF448 domain-containing protein [Limosilactobacillus reuteri];PWT32332.1 DUF448 domain-containing protein [Limosilactobacillus reuteri];PWT68820.1 DUF448 domain-containin	158	7	7	7	74.2	10.78	2951800	2856700	2904250	3540600	3418000	3479300	0.834723	0.584589
ABQ82963.1	ABQ82963.1;UCN18643.1;PWT58509.1;PWT57716.1;OPG88727.1;OYS91378.1;OTA44746.1;OTA44933.1;OTA48297.1;OTA51324.1;OTA55382.1;OJI09817.1;OTA59420.1;OTA43296.1;OTA72539.1;OTA78726.1;OTA79240.1;OTA79265.1;OTA85231.1;OTA86052.1;OTA65552.1;OFB56409.1;OTA73453.1;OAV47887.1;KRK50074.1;AGN99421.1;AMY13401.1;RNF37401.1;UCN16871.1;AXX73627.1;UAW63182.1;UYQ75718.1;UZM89606.1;VTZ89738.1;WLR79948.1;WP_003665798.1…	ABQ82963.1 LSU ribosomal protein L7AE [Limosilactobacillus reuteri subsp. reuteri];UCN18643.1 ribosomal L7Ae/L30e/S12e/Gadd45 family protein [Limosilactobacillus reuteri];PWT58509.1 hypothetical protein DKZ30_07975 [Limosilactobacillus reuteri];PWT57716.1	165	7	7	7	67	11.651	572270	474380	523325	854150	782430	818290	0.639535	0.208838
ABQ82965.1	ABQ82965.1;WP_216578152.1;sp|B2G6V7.1|RBFA_LIMRJ;UPG78776.1;UUW69224.1;WP_260234578.1;UXE90107.1;WP_085719668.1;WP_285227422.1;VTZ89740.1;TGY64043.1;WP_035157849.1;UYQ75720.1;WP_003671131.1;WP_003665800.1;WLR79946.1;WLC96528.1;WJK31009.1;TGY48933.1;TSB20021.1;ROV63586.1;UIT54655.1;OTA59418.1;OYT00484.1;OYT04319.1;UFK67486.1;OYT01035.1;UNL40088.1;UNL37587.1;UIN26523.1;UAW61005.1;UHC31995.1;UGQ3339…	ABQ82965.1 ribosome-binding factor A [Limosilactobacillus reuteri subsp. reuteri];WP_216578152.1 30S ribosome-binding factor RbfA [Limosilactobacillus reuteri];sp|B2G6V7.1|RBFA_LIMRJ RecName: Full=Ribosome-binding factor A;UPG78776.1 30S ribosome-binding f	162	9	9	9	32.8	13.412	2221500	1983300	2102400	2969400	2373000	2671200	0.787062	0.481791
ABQ82966.1	ABQ82966.1;OTA65555.1;OTA59417.1;OTA55385.1;OTA51327.1;AKP00941.1;AMY13398.1;AXX73624.1;BAG25190.1;CCC03006.1;CUR36761.1;CUR43309.1;CUU12752.1;PWT31738.1;OYS56208.1;EDX41501.1;KEQ20548.1;KRK50071.1;OAV47884.1;OFB56412.1;OJI09814.1;OPG88730.1;OTA43299.1;OTA73456.1;PTS27526.1;AGN99418.1;PTS14772.1;WP_285227423.1;WP_229305051.1;WP_229285891.1;QDR72697.1;WP_003668179.1;OTA78729.1;OTA79243.1;OTA86049.…	ABQ82966.1 tRNA pseudouridine synthase B [Limosilactobacillus reuteri subsp. reuteri];OTA65555.1 tRNA pseudouridine(55) synthase TruB [Limosilactobacillus reuteri];OTA59417.1 tRNA pseudouridine(55) synthase TruB [Limosilactobacillus reuteri];OTA55385.1 tRN	187	14	14	2	63.5	33.696	899080	1048700	973890	1632800	1196700	1414750	0.688383	0.288895
ABQ82968.1	ABQ82968.1;OCW68372.1;OTA63862.1;OTA79270.1;OTA79496.1;OTA82951.1;OTA87450.1;OUL54492.1;OXE59374.1;OTA72977.1;OTA73811.1;OTA78731.1;OCW70093.1;OCW64661.1;OYS47301.1;AGR64120.1;AKP00943.1;AMY13396.1;ANU51152.1;AXX73622.1;BAG25192.1;CCC03004.1;CUR36759.1;AGN99412.1;CUR38883.1;OJI09809.1;OCX50183.1;CUU12749.1;OTA59317.1;UNL40085.1;UPG78779.1;UZM89601.1;VTZ93513.1;WLR79943.1;WP_003668175.1;UGQ33398.1…	ABQ82968.1 hypothetical protein Lreu_0703 [Limosilactobacillus reuteri subsp. reuteri];OCW68372.1 hypothetical protein BBP14_08160 [Limosilactobacillus reuteri];OTA63862.1 hypothetical protein BHL93_05970 [Limosilactobacillus reuteri];OTA79270.1 hypothetic	178	6	6	6	60.2	14.673	1458800	1350800	1404800	2196500	1643000	1919750	0.731762	0.369378
WP_094561088.1	WP_094561088.1;WP_273774098.1;WP_229283872.1;WP_229279101.1;WP_228341935.1;WP_182586955.1;WP_113896546.1;WP_109897597.1;WP_107721576.1;WP_003674311.1;WP_094503877.1;PWT65458.1;UAW63190.1;TSB20015.1;TGY64049.1;TGY48939.1;TGB09292.1;WP_229393062.1;PWT68829.1;sp|A5VJE7.1|DNAK_LIMRD;WP_019254151.1;OTA79273.1;OTA78734.1;OTA73808.1;OTA72980.1;OTA63859.1;OJI09806.1;OTA59320.1;OTA51245.1;OTA48289.1;OTA46…	WP_094561088.1 molecular chaperone DnaK [Limosilactobacillus reuteri];WP_273774098.1 molecular chaperone DnaK [Limosilactobacillus reuteri];WP_229283872.1 molecular chaperone DnaK [Limosilactobacillus reuteri];WP_229279101.1 molecular chaperone DnaK [Limos	183	46	46	46	76.1	68.464	52035000	63197000	57616000	68393000	75499000	71946000	0.800823	0.48009
WP_169471044.1	WP_169471044.1;OCW70089.1;PWT64863.1;WP_229308040.1;WP_285142354.1;WP_229287298.1;PWT65457.1;WP_283578149.1;WP_229277308.1;QBE47245.1;TGB09293.1;sp|B2G6W4.1|DNAJ_LIMRJ;sp|A5VJE8.1|DNAJ_LIMRD;UHC32002.1;UGQ33402.1;UCN18633.1;UCN16861.1;WP_302500066.1;OFB57677.1;UAW61012.1;OJI09805.1;OTA82955.1;OTA82324.1;OTA79500.1;OTA79274.1;OTA78735.1;OTA73807.1;OCW62502.1;OCW64657.1;OTA59321.1;OCW68368.1;OTA512…	WP_169471044.1 molecular chaperone DnaJ [Limosilactobacillus reuteri];OCW70089.1 molecular chaperone DnaJ [Limosilactobacillus reuteri];PWT64863.1 molecular chaperone DnaJ [Limosilactobacillus reuteri];WP_229308040.1 molecular chaperone DnaJ [Limosilactoba	192	19	19	19	49.2	41.949	4749000	4881800	4815400	5248700	4954900	5101800	0.943863	0.860619
WP_218046427.1	WP_218046427.1;OJI09788.1;WP_035161407.1;WP_169473548.1;PWT48796.1;WP_223659739.1;WP_229396749.1;WP_273780379.1;WP_271900946.1;WP_262866100.1;WP_257496383.1;WP_229394241.1;WP_226061876.1;WP_229307999.1;WP_229306543.1;WP_229304440.1;WP_229287285.1;WP_229285879.1;WP_229284256.1;WP_229279404.1;WP_229275621.1;WP_229273415.1;WP_019254140.1;WP_065532834.1;WP_065867794.1;WP_066035327.1;WP_139561228.1;OC…	WP_218046427.1 ABC transporter substrate-binding protein/permease [Limosilactobacillus reuteri];OJI09788.1 ABC transporter permease [Limosilactobacillus reuteri];WP_035161407.1 ABC transporter substrate-binding protein/permease [Limosilactobacillus reuteri	197	9	9	1	23.1	55.914	249260	199110	224185	659630	445390	552510	0.405757	0.0590569
WP_134907929.1	WP_134907929.1;UZM89580.1;UHC32023.1;UGQ33423.1;WP_003665847.1;WLR79913.1;WLC96550.1;WJK31094.1;VTZ93742.1;UXE90133.1;WP_003674289.1;QIZ04130.1;UUW69298.1;UPG78805.1;UNL40059.1;UNL36657.1;UIT54679.1;UIN26498.1;UFK67464.1;UFK66266.1;UCN18617.1;QPB66072.1;QLQ61939.1;UCN16846.1;UAW61036.1;TSB19992.1;TGY56479.1;TGY44605.1;TGB11748.1;ROV63557.1;OYS88790.1;QKT15536.1;RNF37376.1;RMX27431.1;RMX26414.1;QW…	WP_134907929.1 30S ribosomal protein S21 [Limosilactobacillus reuteri];UZM89580.1 30S ribosomal protein S21 [Limosilactobacillus reuteri];UHC32023.1 30S ribosomal protein S21 [Limosilactobacillus reuteri];UGQ33423.1 30S ribosomal protein S21 [Limosilactoba	155	7	7	7	46	7.6748	13178000	12944000	13061000	11678000	10148000	10913000	1.19683	0.633532
WP_229267636.1	WP_229267636.1;OTA42600.1;UZM89575.1;WP_003665854.1;VTZ89069.1;WP_216271425.1;WP_153702531.1;WP_135951054.1;TSB19986.1;WP_219285327.1;WP_228342681.1;WP_229273422.1;WP_229276653.1;WP_229277605.1;WP_153701346.1;WP_229304073.1;WP_229394230.1;WP_229410659.1;WP_251939387.1;WP_285227464.1;WP_306037913.1;UNL40053.1;WP_229306540.1;PWT47118.1;RNF37371.1;OCW69669.1;OCX50112.1;OFB58920.1;OJI09781.1;OPG88644…	WP_229267636.1 biotin--[acetyl-CoA-carboxylase] ligase [Limosilactobacillus reuteri];OTA42600.1 biotin--[acetyl-CoA-carboxylase] ligase [Limosilactobacillus reuteri];UZM89575.1 biotin--[acetyl-CoA-carboxylase] ligase [Limosilactobacillus reuteri];WP_003665	148	3	3	3	13.8	37.885	82654	78132	80393	112230	138120	125175	0.642245	0.317311
EEI65196.1	EEI65196.1;OTA49693.1;PIN31162.1;PTM28641.1;PTM30836.1;PTS13598.1;PTS26438.1;PTV02139.1;PUH36109.1;OUP89096.1;PUH36418.1;OTA57016.1;AKP00978.1;OPG88646.1;AMY13322.1;ANU51180.1;BAG25223.1;CCC02976.1;CUU12715.1;EDX41541.1;OTA55021.1;KEK15876.1;OFB58922.1;OJI09779.1;OXE59346.1;OUN48951.1;OTA57095.1;OTA88512.1;WP_229277604.1;ABQ83000.1;KRK47456.1;AEI58198.1;AGN99381.1;CUR38174.1;CUR37471.1;PWT66040.1…	EEI65196.1 translation metalloprotein YbeY [Limosilactobacillus reuteri CF48-3A];OTA49693.1 rRNA maturation RNase YbeY [Limosilactobacillus reuteri];PIN31162.1 rRNA maturation RNase YbeY [Limosilactobacillus reuteri];PTM28641.1 rRNA maturation RNase YbeY [	185	5	5	5	54.4	18.133	1108100	696740	902420	1448500	1783000	1615750	0.558515	0.105687
OFB58925.1	OFB58925.1;KRK47460.1;WJK31105.1;TGY57742.1;TSB19980.1;WP_003668127.1;WP_003665860.1;WP_242079456.1;WP_229272150.1;WP_229279398.1;WP_168240276.1;WP_134988880.1;WP_123835348.1;WP_122481315.1;WP_086131967.1;WP_085719933.1;WP_035169813.1;UAW63219.1;TGY48449.1;UCN16835.1;UCN18606.1;UFK66279.1;UYQ75765.1;OYS97172.1;OUP89092.1;WLR79901.1;UAW61047.1;WLC96562.1;VTZ89063.1;UZM89570.1;UXE90145.1;UFK67451.1…	OFB58925.1 glycine--tRNA ligase subunit alpha [Limosilactobacillus reuteri];KRK47460.1 glycyl-tRNA synthetase subunit alpha [Limosilactobacillus reuteri subsp. reuteri];WJK31105.1 glycine--tRNA ligase subunit alpha [Limosilactobacillus reuteri];TGY57742.1	168	14	14	14	41.6	36.745	13577000	12686000	13131500	19320000	14838000	17079000	0.768868	0.402243
ABQ83007.1	ABQ83007.1;OCW69641.1;TGB11733.1;TGY48452.1;TGY57739.1;TSB19977.1;UAW61049.1;WP_153706860.1;WP_260234601.1;PWT63840.1;PWT66047.1;OTA86404.1;OYS91726.1;OCW62711.1;OCW65380.1;OCW69678.1;RNF37362.1;OCX50103.1;OJI09772.1;OPG88653.1;OTA42591.1;OTA43796.1;OTA47684.1;OTA48571.1;OTA49700.1;OTA55014.1;OTA57009.1;OTA57102.1;OTA71199.1;OAV47331.1;ROV63543.1;RMX27416.1;KRK47463.1;WP_086118452.1;UHC32037.1;UN…	ABQ83007.1 RNA polymerase, sigma 70 subunit, RpoD [Limosilactobacillus reuteri subsp. reuteri];OCW69641.1 RNA polymerase sigma factor RpoD [Limosilactobacillus reuteri];TGB11733.1 RNA polymerase sigma factor RpoD [Limosilactobacillus reuteri];TGY48452.1 RN	167	18	18	4	43.9	43.385	7637600	9136300	8386950	11767000	11739000	11753000	0.713601	0.280832
QLQ61918.1	QLQ61918.1;UNL40040.1;WP_113896521.1;WP_094509667.1;WP_085720326.1;WP_019253448.1;WP_019251630.1;WP_003674260.1;WP_003671058.1;WP_003668118.1;WLR79893.1;WLC96624.1;WJK31113.1;UZM89562.1;RMX26434.1;RMX27411.1;QQR14869.1;PUH35014.1;PWT43621.1;WP_135951059.1;WP_169471957.1;WP_153701339.1;UYQ75774.1;UNL37625.1;UIT54698.1;UIN26479.1;UHC32043.1;UGQ33443.1;UFK67443.1;UAW63227.1;UAW61054.1;TSB20726.1;TGY…	QLQ61918.1 YjzD family protein [Limosilactobacillus reuteri];UNL40040.1 YjzD family protein [Limosilactobacillus reuteri];WP_113896521.1 YjzD family protein [Limosilactobacillus reuteri];WP_094509667.1 YjzD family protein [Limosilactobacillus reuteri];WP_0	165	1	1	1	13.4	7.2585	327620	296540	312080	344970	286780	315875	0.987986	0.867089
ABQ83031.1	ABQ83031.1;OTA88430.1;EGC15253.1;AKP01009.1;AMY13292.1;AXX73554.1;BAG25253.1;CCC02946.1;CUR37441.1;CUR38144.1;CUR40638.1;CUR43700.1;CUU12685.1;sp|B2G721.1|CCA_LIMRJ;EEI08436.1;KRK50260.1;OAV47669.1;OFB59355.1;OPG88676.1;OTA42568.1;OTA43773.1;OTA47707.1;OTA51785.1;OTA56987.1;AGN99351.1;OTA83345.1;PWT32017.1;TGY48475.1;OTA88229.1;WP_113896510.1;PWT33266.1;PWT36114.1;PWT38305.1;PWT42107.1;PWT43161.1…	ABQ83031.1 Polynucleotide adenylyltransferase region [Limosilactobacillus reuteri subsp. reuteri];OTA88430.1 CCA tRNA nucleotidyltransferase [Limosilactobacillus reuteri];EGC15253.1 tRNA nucleotidyltransferase/poly(A) polymerase family protein [Limosilacto	218	12	12	12	46.4	45.099	873560	924400	898980	1377700	1197700	1287700	0.698128	0.306273
ABQ83032.1	ABQ83032.1;KRK50259.1;AGN99350.1;AKP01010.1;BAG25254.1;CCC02945.1;CUR37440.1;CUR40639.1;CUR43701.1;CUU12684.1;EDX41678.1;EEI08437.1;EGC15252.1;KEQ20443.1;OAV47670.1;PWT67522.1;OCW61542.1;OCW63125.1;OCW63292.1;OCW69017.1;OCW69702.1;OON66615.1;OTA42567.1;OTA43772.1;OTA47708.1;OTA49723.1;OTA54991.1;PWT65972.1;OTA51786.1;OTA56986.1;PWT61518.1;OTA57126.1;UCN16808.1;OTA71777.1;OTA72172.1;OTA77656.1;OTA…	ABQ83032.1 ABC transporter related [Limosilactobacillus reuteri subsp. reuteri];KRK50259.1 ABC transporter-like protein [Limosilactobacillus reuteri subsp. reuteri];AGN99350.1 ABC transporter ATP-binding component [Limosilactobacillus reuteri I5007];AKP010	232	20	20	20	37.3	72.792	3128500	3112700	3120600	4121100	3964000	4042550	0.771939	0.409511
ABQ83034.1	ABQ83034.1;BAG25256.1;OXE59313.1;OTA71775.1;OTA72174.1;PTS14825.1;OCW69015.1;AGN99348.1;AKP01012.1;AMY13289.1;ANU51213.1;AXX73551.1;CCC02943.1;OUL54402.1;CUR37438.1;OCW63290.1;CUR40641.1;OCW63127.1;CUU12682.1;EEI08439.1;EGC15250.1;KEK15961.1;KEQ20441.1;KRK50257.1;OTA57128.1;OTA88427.1;OCW61540.1;OTA47710.1;WP_142499298.1;WP_229407599.1;WP_229285027.1;WP_267493285.1;WP_229288001.1;WP_086878959.1;P…	ABQ83034.1 dihydrofolate reductase [Limosilactobacillus reuteri subsp. reuteri];BAG25256.1 dihydrofolate reductase [Limosilactobacillus reuteri subsp. reuteri JCM 1112];OXE59313.1 dihydrofolate reductase [Limosilactobacillus reuteri];OTA71775.1 diacylglyce	190	4	4	4	32.1	18.66	315240	317690	316465	374280	440490	407385	0.77682	0.527242
ABQ83130.1	ABQ83130.1;OCX50044.1;UCN18545.1;ROV62420.1;TGB11677.1;PWT67555.1;PWT69673.1;OUP87171.1;OYT09730.1;OJI11746.1;OON60129.1;OPG88623.1;OTA43531.1;OTA48406.1;OTA48873.1;AGR64205.1;OJI11262.1;OTA62171.1;OTA71139.1;OTA72087.1;OTA74267.1;OTA77954.1;OTA78065.1;OTA53246.1;OTA81531.1;OTA68855.1;OAV46689.1;KGE70311.1;UCN16774.1;UAW61564.1;UAW61205.1;TSB18755.1;UIT54753.1;UNL36065.1;UPG79109.1;UUW69370.1;UYQ…	ABQ83130.1 hypothetical protein Lreu_0867 [Limosilactobacillus reuteri subsp. reuteri];OCX50044.1 hypothetical protein BFD03_00525 [Limosilactobacillus reuteri];UCN18545.1 hypothetical protein LEP61_05510 [Limosilactobacillus reuteri];ROV62420.1 hypothetic	163	14	14	14	92.3	10.576	11605000	14455000	13030000	10031000	9085900	9558450	1.36319	0.414657
KRK51525.1	KRK51525.1;WP_085680236.1;WP_153701955.1;WP_153702486.1;WP_229276658.1;WP_283580988.1;WP_257525237.1;WP_251939543.1;WP_230212530.1;WP_229410672.1;WP_229394110.1;WP_229286892.1;WP_229285144.1;WP_229284480.1;WP_229278398.1;WP_229272088.1;WP_153706130.1;WP_229268236.1;WP_228342151.1;WP_219178707.1;WP_217324600.1;WP_181462553.1;WP_169477767.1;WP_169470946.1;WP_168240405.1;QDR72578.1;WP_085721998.1;WP…	KRK51525.1 major facilitator transporter [Limosilactobacillus reuteri subsp. reuteri];WP_085680236.1 MULTISPECIES: MFS transporter [Limosilactobacillus];WP_153701955.1 MFS transporter [Limosilactobacillus reuteri];WP_153702486.1 MFS transporter [Limosilact	214	1	1	1	4.3	40.345	127160	99262	113211	48295	78169	63232	1.79041	0.351429
ABQ83150.1	ABQ83150.1;OTA59453.1;OFB57236.1;OUL54272.1;OCW71151.1;OTA73194.1;OTA74722.1;OTA77897.1;OTA78957.1;OTA82960.1;OTA84298.1;OTA85705.1;OTA67592.1;OTA72390.1;EEI08742.1;OCW65620.1;CUU12627.1;AKP01126.1;AMY13234.1;AWD62320.1;BAG25349.1;CCC02892.1;CUR36999.1;CUR38494.1;OCW69806.1;OYS57808.1;OTA58064.1;OTA50890.1;OTA50251.1;OTA47084.1;UPG79089.1;WP_122481263.1;UXE90328.1;UYQ75849.1;UZM89489.1;VTZ93093.1…	ABQ83150.1 1,4-Dihydroxy-2-naphthoate synthase [Limosilactobacillus reuteri subsp. reuteri];OTA59453.1 1,4-dihydroxy-2-naphthoyl-CoA synthase [Limosilactobacillus reuteri];OFB57236.1 1,4-dihydroxy-2-naphthoyl-CoA synthase [Limosilactobacillus reuteri];OUL5	176	9	9	9	34.4	30.019	856000	1057500	956750	1158200	1335100	1246650	0.767457	0.440902
TSB19343.1	TSB19343.1;KEQ20393.1;OPG88594.1;OTA85709.1;OUL54277.1;OXE59261.1;OYS45032.1;OYS46737.1;OYS47772.1;OYS53815.1;OTA78961.1;OTA77893.1;OTA85099.1;OCW71154.1;EDX41733.1;ABQ83154.1;AMY13230.1;ANU51262.1;AXX73488.1;CUR37004.1;CUR38490.1;CUR42170.1;OFB57234.1;TGY64322.1;AGN99287.1;OYS55814.1;OTA47080.1;OTA74726.1;UNL36088.1;UXE90333.1;UPG79084.1;WP_260245511.1;WP_003666143.1;WLR79815.1;WJK31196.1;VTZ931…	TSB19343.1 Fe-S cluster assembly ATPase SufC [Limosilactobacillus reuteri];KEQ20393.1 iron ABC transporter ATP-binding protein [Limosilactobacillus reuteri];OPG88594.1 ABC transporter ATP-binding protein [Limosilactobacillus reuteri];OTA85709.1 Fe-S cluste	176	18	18	18	72.5	29.46	14209000	16694000	15451500	14540000	13408000	13974000	1.10573	0.786714
EEI08750.1	EEI08750.1;OTA58071.1;AGR64226.1;AKP01134.1;BAG25356.1;CCC02884.1;CUR43820.1;CUU12619.1;KRK51535.1;OAV46767.1;AGN99284.1;OCW61596.1;OCW65626.1;OCW69562.1;OCW71157.1;OFB57232.1;OJI11230.1;OPG88597.1;OTA43910.1;OTA46412.1;OCW63722.1;OTA47077.1;UNL36091.1;UPG79081.1;OTA72397.1;EGC15123.1;OTA73187.1;OTA78964.1;OTA84305.1;OTA85102.1;OTA85712.1;OUL54280.1;PTS16401.1;OTA67585.1;PTS30085.1;QDK48627.1;QDR…	EEI08750.1 SUF system FeS assembly protein, NifU family [Limosilactobacillus reuteri MM2-3];OTA58071.1 SUF system NifU family Fe-S cluster assembly protein [Limosilactobacillus reuteri];AGR64226.1 Fe-S assembly protein NifU [Limosilactobacillus reuteri TD1	182	9	9	9	82.9	18.052	2478200	2952200	2715200	1938400	1980700	1959550	1.38562	0.441951
WP_086132197.1	WP_086132197.1;OCW69558.1;OCX50017.1;OFB57229.1;OON64979.1;OPG88555.1;OTA46583.1;OCW65630.1;OTA47073.1;OTA50262.1;OTA50954.1;OTA58992.1;OTA59464.1;OTA67581.1;OTA72901.1;OTA73761.1;OTA48365.1;OCW63718.1;OCW61600.1;OAV48117.1;AGN99279.1;AGR64232.1;AKP01139.1;AMY13223.1;ANU51269.1;OCW71161.1;ROV63888.1;CCC02879.1;OTA79447.1;OTA85106.1;BAG25361.1;UAW61593.1;WP_216578009.1;UFK66483.1;UFK67254.1;UGQ335…	WP_086132197.1 cytochrome b5 domain-containing protein [Limosilactobacillus reuteri];OCW69558.1 cytochrome B5 [Limosilactobacillus reuteri];OCX50017.1 cytochrome B5 [Limosilactobacillus reuteri];OFB57229.1 cytochrome B5 [Limosilactobacillus reuteri];OON649	167	5	5	5	69	9.4788	3823800	4239700	4031750	3439000	2679400	3059200	1.31791	0.466769
ABQ83166.1	ABQ83166.1;AMY13220.1;OTA58995.1;OTA50951.1;OTA50265.1;UXE88226.1;WP_035157447.1;UZM89473.1;WP_261295979.1;WP_242079387.1;WP_229393317.1;WP_229305829.1;WP_229304090.1;WP_229285153.1;WP_289218478.1;WP_003674136.1;WJK31207.1;WP_003667907.1;WP_229286902.1;WP_229283476.1;VTZ93134.1;OTA59467.1;OTA67578.1;WP_285142455.1;OYS55826.1;ADD37854.1;OCX50014.1;OJI11222.1;OTA46580.1;OTA84966.1;OYS63658.1;OYS575…	ABQ83166.1 signal transduction histidine kinase, LytS [Limosilactobacillus reuteri subsp. reuteri];AMY13220.1 histidine kinase [Limosilactobacillus reuteri];OTA58995.1 histidine kinase [Limosilactobacillus reuteri];OTA50951.1 histidine kinase [Limosilactob	216	4	4	4	11.2	65.231	13715	34327	24021	27378	58173	42775.5	0.56156	0.207835
KRK51545.1	KRK51545.1;UCN16738.1;OTA50266.1;OTA48361.1;OTA47069.1;PWT61380.1;QDR72557.1;PWT64391.1;WP_229281378.1;WP_229275674.1;PWT67592.1;QBE45552.1;UHC30455.1;PWT69706.1;WP_144227005.1;ROV63892.1;UGQ33590.1;WP_260234674.1;OTA50950.1;OTA59468.1;OYS46750.1;AGN99274.1;OCW69554.1;OCW71165.1;OCX50013.1;OPG88558.1;OYS47666.1;OYS45045.1;OTA72905.1;OTA87456.1;OTA84967.1;OTA79443.1;OTA77882.1;OTA74306.1;OTA73765.…	KRK51545.1 LytTR family two component transcriptional regulator [Limosilactobacillus reuteri subsp. reuteri];UCN16738.1 LytTR family transcriptional regulator DNA-binding domain-containing protein [Limosilactobacillus reuteri];OTA50266.1 DNA-binding respon	184	3	3	3	13	28.075	528520	456910	492715	486690	341150	413920	1.19036	0.854772
KRK51547.1	KRK51547.1;OAV48123.1;OFB57227.1;OTA58998.1;OTA46577.1;OTA67575.1;OTA73767.1;OTA74308.1;OTA77880.1;OTA79441.1;OTA59470.1;OTA72907.1;CUR37019.1;KEQ20377.1;KEK16336.1;AGN99272.1;AKP01146.1;AMY13217.1;ANU51274.1;AWD62342.1;BAG25368.1;CCC02872.1;OTA50948.1;OTA50268.1;OTA48359.1;OTA47067.1;UYQ75870.1;UZM89470.1;VTZ90910.1;WJK31210.1;WP_003666171.1;UPG79070.1;WP_020843098.1;WP_086141878.1;WP_109883382.…	KRK51547.1 LrgB family protein [Limosilactobacillus reuteri subsp. reuteri];OAV48123.1 antiholin LrgB [Limosilactobacillus reuteri];OFB57227.1 antiholin LrgB [Limosilactobacillus reuteri];OTA58998.1 antiholin LrgB [Limosilactobacillus reuteri];OTA46577.1 a	148	3	3	3	22.7	23.466	12308000	17766000	15037000	10904000	7477100	9190550	1.63614	0.196688
CUR43802.1	CUR43802.1;ANU51279.1;WP_229272069.1;WP_229270478.1;OTA79436.1;OAV48127.1;WP_113896465.1;AWD62347.1;WP_094538479.1;OCX50006.1;AMY13211.1;AGR64240.1;OFB58309.1;EEI08768.1;CUR37024.1;EGC15105.1;WP_216578014.1;AKP01152.1;WP_229281376.1;WP_003674130.1;OUL54295.1;EDX41756.1;KRK51553.1;CCC02867.1;WP_251672261.1;KEK13816.1;BAG25374.1;UCN16731.1;UCN18503.1;CUU12602.1;WJK31215.1;UNL39877.1;WP_029507921.1;…	CUR43802.1 hypothetical protein LRLP16767_LRLP167_01601 [Limosilactobacillus reuteri];ANU51279.1 hypothetical protein A4V07_02855 [Limosilactobacillus reuteri];WP_229272069.1 DUF1440 domain-containing protein [Limosilactobacillus reuteri];WP_229270478.1 DU	180	3	3	3	24.7	17.533	2928900	3799200	3364050	2494300	2271300	2382800	1.41181	0.414156
ABQ83174.1	ABQ83174.1;WP_229277046.1;WP_230212524.1;WP_229411917.1;WP_229397471.1;WP_229396852.1;WP_229308824.1;WP_229307819.1;WP_229282396.1;WP_229281059.1;WP_229268718.1;QIZ04346.1;WP_228342779.1;WP_228341352.1;WP_153707430.1;WP_168240413.1;UAW61250.1;QKT15415.1;UXE88236.1;UNL39876.1;WP_229272068.1;QPB66385.1;UIT54796.1;OTA79435.1;QDR72549.1;OYS46758.1;CCC02866.1;BAG25375.1;OUN49107.1;OUL54296.1;OTA87464.…	ABQ83174.1 isopentenyl-diphosphate delta-isomerase, type 2 [Limosilactobacillus reuteri subsp. reuteri];WP_229277046.1 type 2 isopentenyl-diphosphate Delta-isomerase [Limosilactobacillus reuteri];WP_230212524.1 type 2 isopentenyl-diphosphate Delta-isomeras	209	8	8	8	32.2	38.769	976610	1018900	997755	1689400	1554700	1622050	0.61512	0.173661
ABQ83180.1	ABQ83180.1;EEI08775.1;OCW68907.1;AGN99260.1;AMY13204.1;AWD62355.1;BAG25381.1;CCC02860.1;CUR37031.1;CUR43795.1;CUU12595.1;EDX41763.1;AKP01159.1;PWT36198.1;EGC15098.1;KEK14573.1;KEQ20366.1;KGE70265.1;KRK51560.1;OAV48134.1;OCW61618.1;OCW63700.1;OCW65648.1;WP_251672265.1;OCW71179.1;OTA79429.1;OFB58315.1;OTA73779.1;WP_285227515.1;OPG88572.1;UCN18496.1;OTA48347.1;OTA50280.1;OTA50936.1;OTA56348.1;OTA590…	ABQ83180.1 DNA replication protein DnaD [Limosilactobacillus reuteri subsp. reuteri];EEI08775.1 DnaD domain protein [Limosilactobacillus reuteri MM2-3];OCW68907.1 DNA replication protein DnaD [Limosilactobacillus reuteri];AGN99260.1 primosome, DnaD subunit	197	4	4	4	28.2	27.508	156210	163050	159630	134750	209600	172175	0.927138	0.771628
OTA46857.1	OTA46857.1;TSB19738.1;BAG25385.1;CCC02856.1;CUR37035.1;CUR44180.1;CUU12591.1;EEI08779.1;EGC15094.1;OAV48138.1;OFB59533.1;sp|B2G7F3.1|Y869_LIMRJ;OJI11206.1;OTA44450.1;OTA46561.1;OTA50284.1;OTA50473.1;OTA56352.1;OTA59486.1;OTA72624.1;OTA73577.1;AKP01163.1;OPG88576.1;AMY13200.1;OTA72682.1;UHC30438.1;OTA84985.1;PTS16427.1;PTS30059.1;PWT31898.1;PWT33168.1;PWT33301.1;PWT42526.1;PWT44828.1;PWT51277.1;PW…	OTA46857.1 hypothetical protein BHL85_13365, partial [Limosilactobacillus reuteri];TSB19738.1 DUF1273 domain-containing protein [Limosilactobacillus reuteri];BAG25385.1 conserved hypothetical protein [Limosilactobacillus reuteri subsp. reuteri JCM 1112];CC	202	3	3	3	25	22.093	143550	110420	126985	184290	235740	210015	0.604647	0.264156
PWT37902.1	PWT37902.1;TGY49793.1;OCW71184.1;OCX49994.1;OFB59534.1;OYS71578.1;OJI11205.1;OPG88577.1;OTA44449.1;OYS67713.1;OYS73840.1;QDK48598.1;QPB66374.1;RMX26537.1;RMX27297.1;RNF37251.1;ROV63911.1;OCW68902.1;OCW65653.1;OCW63695.1;OYS86137.1;OTA48342.1;OTA46560.1;AGR64252.1;AMY13199.1;ANU51291.1;QQR14769.1;EGC15093.1;OCW61623.1;KEK13822.1;KEK14568.1;KEQ20362.1;KGE70261.1;KRK51565.1;OAV48139.1;TGB12430.1;TGY…	PWT37902.1 cell division regulator GpsB [Limosilactobacillus reuteri];TGY49793.1 cell division regulator GpsB [Limosilactobacillus reuteri];OCW71184.1 cell division protein GpsB [Limosilactobacillus reuteri];OCX49994.1 cell division protein GpsB [Limosilac	167	10	10	10	76.4	14.251	5233100	5843500	5538300	6658900	6230600	6444750	0.859351	0.632345
UAW61619.1	UAW61619.1;TGY59439.1;OYT02658.1;WP_078009580.1;ROV63915.1;WP_134988984.1;WP_242079381.1;WP_229270474.1;WP_153707440.1;WP_153701308.1;WP_117115138.1;OTA50478.1;WP_003667861.1;WP_107721590.1;WP_102816036.1;WP_094512555.1;WP_094509549.1;WP_094502224.1;WP_080735346.1;WLR79779.1;UCN16713.1;OYS52913.1;UCN18485.1;OYS97245.1;WJK31231.1;TSB19743.1;OYT08226.1;OYT02540.1;UIT54811.1;UZM89449.1;UYQ75891.1;UX…	UAW61619.1 EbsA family protein [Limosilactobacillus reuteri];TGY59439.1 VPDSG-CTERM exosortase interaction domain protein [Limosilactobacillus reuteri];OYT02658.1 VPDSG-CTERM exosortase interaction domain protein [Limosilactobacillus reuteri];WP_078009580.	168	2	2	2	12.5	18.02	479990	470200	475095	844960	544890	694925	0.683664	0.280638
ABQ83210.1	ABQ83210.1;OYS48479.1;WP_003667826.1;WP_003666232.1;WLR79762.1;WP_153702143.1;UZM89430.1;VTZ93292.1;WP_228340845.1;WP_218046640.1;WP_283577977.1;WP_019252775.1;WP_260255004.1;WP_257496989.1;WP_229307931.1;WP_229287017.1;WP_229280433.1;WLC94915.1;UYQ75909.1;PWT41142.1;WP_004562276.1;WP_020843103.1;OCW63768.1;WP_153701107.1;OCW61740.1;OAV46793.1;PWT32314.1;OYS50054.1;PWT37303.1;WP_168240426.1;WJK31…	ABQ83210.1 transcriptional repressor, CopY family [Limosilactobacillus reuteri subsp. reuteri];OYS48479.1 uracil phosphoribosyltransferase [Limosilactobacillus reuteri];WP_003667826.1 MULTISPECIES: CopY/TcrY family copper transport repressor [Limosilactoba	184	2	2	2	21.1	16.201	181820	149720	165770	228920	226320	227620	0.728275	0.449065
ABQ83214.1	ABQ83214.1;PWT61884.1;WP_228341366.1;WP_122481222.1;PWT58426.1;WP_229278673.1;WP_169473142.1;PWT53418.1;PWT63223.1;OYS99894.1;RMX27267.1;QWS05129.1;UAW61396.1;TSB18655.1;TGY58614.1;TGY46240.1;OYS50050.1;OCW70395.1;KRK47978.1;OTA56381.1;OTA47221.1;OTA85757.1;OTA85433.1;OTA85014.1;OTA77776.1;OTA72653.1;OCW67139.1;OCX49971.1;OTA50369.1;OTA45898.1;OCW61744.1;OTA45396.1;OPG88505.1;OJI11176.1;TGB12459.…	ABQ83214.1 Glyoxalase/bleomycin resistance protein/dioxygenase [Limosilactobacillus reuteri subsp. reuteri];PWT61884.1 VOC family virulence protein [Limosilactobacillus reuteri];WP_228341366.1 VOC family protein [Limosilactobacillus reuteri];WP_122481222.1	179	6	6	6	56.9	14.777	1276000	1597500	1436750	1893900	1935700	1914800	0.750339	0.406084
ABQ83232.1	ABQ83232.1;PWT69220.1;QWS05144.1;PWT62021.1;OCW63749.1;OCW67124.1;OCW70380.1;OTA48231.1;OTA48414.1;OTA52257.1;OTA55524.1;PWT62092.1;OTA60597.1;OTA71919.1;OTA72495.1;PWT29830.1;OTA73611.1;OCW61759.1;OAV47091.1;KRK45267.1;AEI58446.1;AGN99207.1;AGR64290.1;AKP01211.1;AMY13157.1;BAG25427.1;OTA43159.1;CCC02812.1;CUR36371.1;OTA76372.1;CUR44038.1;PWT63064.1;OJI11160.1;EDX42396.1;OFB60018.1;VTZ91260.1;WLC…	ABQ83232.1 nucleotide deoxyribosyltransferase [Limosilactobacillus reuteri subsp. reuteri];PWT69220.1 nucleoside 2-deoxyribosyltransferase [Limosilactobacillus reuteri];QWS05144.1 nucleoside 2-deoxyribosyltransferase [Limosilactobacillus reuteri];PWT62021.	187	7	7	7	55	18.201	4372700	4883300	4628000	4991300	4329000	4660150	0.993101	0.990894
AWD62469.1	AWD62469.1;CUR43190.1;QPB66268.1;OTA84604.1;OTA82817.1;AMY13103.1;ANU51388.1;BAG25485.1;CCC02755.1;CUR36551.1;CUR38760.1;CUR41361.1;OTA83118.1;OAV47855.1;AGN99147.1;CUU12486.1;OPG88460.1;OTA43126.1;OTA46295.1;OTA49141.1;OTA58714.1;OTA61305.1;OTA73648.1;OTA77624.1;PWT51775.1;PWT49754.1;QDK48499.1;QBE45674.1;EEI08633.1;EGC14971.1;AKP01282.1;WP_102816531.1;PTS25868.1;PWT30005.1;PWT31518.1;PWT33774.1…	AWD62469.1 phosphomethylpyrimidine kinase [Limosilactobacillus reuteri];CUR43190.1 Hydroxymethylpyrimidine phosphate kinase ThiD [Limosilactobacillus reuteri];QPB66268.1 bifunctional hydroxymethylpyrimidine kinase/phosphomethylpyrimidine kinase [Limosilact	196	4	4	4	16	27.828	76792	154440	115616	190630	189460	190045	0.608361	0.269254
ABQ83323.1	ABQ83323.1;OTA53032.1;QKT15252.1;QLL76175.1;QLQ62786.1;PWT63171.1;PWT68291.1;PWT36825.1;UUW67597.1;VTZ93805.1;UYQ74231.1;UXE88372.1;WJK31385.1;WLC95031.1;WLR79611.1;WP_003663508.1;UZM91070.1;PWT31456.1;PUH33318.1;OCW61403.1;OCW63937.1;OCW66997.1;OCW70238.1;OFB60041.1;OJI11512.1;KRK45424.1;OTA58758.1;KGE70469.1;OTA42852.1;OTA43056.1;OTA48207.1;QIZ04512.1;QDK48424.1;QBE45717.1;UNL36211.1;TGY45995.1…	ABQ83323.1 4-oxalocrotonate tautomerase [Limosilactobacillus reuteri subsp. reuteri];OTA53032.1 4-oxalocrotonate tautomerase [Limosilactobacillus reuteri];QKT15252.1 4-oxalocrotonate tautomerase [Limosilactobacillus reuteri];QLL76175.1 4-oxalocrotonate tau	160	6	6	6	73.8	6.8159	5457100	6077600	5767350	5499500	4773200	5136350	1.12285	0.756113
EGC15934.1	EGC15934.1;KEK16918.1;PWT56732.1;OCW63936.1;OCW61402.1;OAV48006.1;KRK45425.1;KEQ21350.1;EDX42220.1;OTA42369.1;CUU12435.1;CUR36445.1;CCC04651.1;AMY14986.1;AKP01335.1;AGN99073.1;OCW66998.1;OFB60040.1;OJI11511.1;OYT03981.1;OPG88378.1;OTA42851.1;OTA43055.1;OTA48208.1;OTA48368.1;OTA53033.1;OTA57344.1;OTA69802.1;OTA73059.1;OTA76153.1;OTA76362.1;OCW70237.1;PWT58355.1;OYS65932.1;OTA81189.1;OTA83675.1;OYS…	EGC15934.1 TrkA C-terminal domain protein [Limosilactobacillus reuteri MM4-1A];KEK16918.1 potassium transporter [Limosilactobacillus reuteri];PWT56732.1 potassium transporter [Limosilactobacillus reuteri];OCW63936.1 potassium transporter [Limosilactobacill	268	10	10	5	21.5	69.317	819200	1039800	929500	434510	638300	536405	1.73283	0.180664
UGQ31879.1	UGQ31879.1;EEI08341.1;QPB66221.1;UAW59427.1;UCN20034.1;AKP01336.1;BAG25531.1;OTA69803.1;CUU12434.1;QBE45719.1;CUR36446.1;CCC04652.1;AMY14985.1;UZM91068.1;UCN18269.1;UYQ74233.1;QDK48422.1;PTS25569.1;UHC32170.1;OTA48367.1;OFB60039.1;OJI11510.1;OPG88379.1;OTA42370.1;OTA43054.1;OTA48209.1;EGC15933.1;PTS13960.1;OTA53034.1;OTA70979.1;OTA73058.1;OTA76154.1;OTA76361.1;OTA81188.1;KRK45426.1;OAV48005.1;VTZ…	UGQ31879.1 C69 family dipeptidase [Limosilactobacillus reuteri];EEI08341.1 peptidase, C69 family [Limosilactobacillus reuteri MM2-3];QPB66221.1 C69 family dipeptidase [Limosilactobacillus reuteri];UAW59427.1 C69 family dipeptidase [Limosilactobacillus reut	266	18	18	3	48.8	52.667	2426700	2313200	2369950	2447300	2732700	2590000	0.915039	0.762813
WP_146196606.1	WP_146196606.1;WP_085954360.1;WP_072575204.1;WP_064562260.1;WP_016497187.1;WP_136001938.1;PWT40343.1;UGQ31880.1;AMY14030.1;OTA78654.1;OTA75732.1;OTA65561.1;OTA60921.1;OTA49384.1;OTA43358.1;OTA42891.1;OPG86510.1;OJI10435.1;OAV48004.1;EGC15932.1;BAG25532.1;PWT36828.1;CUU11702.1;OTA88829.1;OTA93137.1;OTA44153.1;OYS52992.1;PWT49955.1;AGO00075.1;WP_079376418.1;WP_086143133.1;AMY13486.1;WP_094537399.1;…	WP_146196606.1 helix-turn-helix domain-containing protein, partial [Limosilactobacillus reuteri];WP_085954360.1 helix-turn-helix domain-containing protein [Limosilactobacillus reuteri];WP_072575204.1 helix-turn-helix domain-containing protein [Limosilactob	129	2	2	2	22.2	9.7849	117610	97369	107490	172440	142200	157320	0.683254	0.378676
WP_271901472.1	WP_271901472.1;WLC95041.1;UZM91044.1;VTZ91803.1;WP_085649787.1;WP_019253813.1;WP_003667006.1;WP_003665705.1;WLR79592.1;UHC32162.1;UFK69254.1;OYS96915.1;UIN26215.1;UYQ74241.1;UXE88384.1;UUW67620.1;UPG78943.1;UNL39722.1;OYT01900.1;TGY61132.1;UIT54966.1;TSB18704.1;TGB09353.1;TGY47804.1;UFK66720.1;UCN20013.1;UCN18247.1;UAW61739.1;UAW59436.1;QWS03294.1;RMX25882.1;QQR14568.1;UGQ31887.1;sp|B2G7V8.1|RS14…	WP_271901472.1 30S ribosomal protein S14 [Limosilactobacillus reuteri];WLC95041.1 30S ribosomal protein S14 [Limosilactobacillus reuteri];UZM91044.1 30S ribosomal protein S14 [Limosilactobacillus reuteri];VTZ91803.1 Alternate 30S ribosomal protein S14 [Lim	158	4	4	4	32.6	10.381	2230400	2323300	2276850	2395500	1935600	2165550	1.0514	0.947778
WP_019252471.1	WP_019252471.1;UXE88402.1;UPG79173.1;WP_003675625.1;WLR79571.1;WLC95060.1;WJK31424.1;UYQ74323.1;UIN26799.1;WP_035160263.1;UZM91025.1;UNL41598.1;UNL36240.1;UIT54980.1;QPB66488.1;RMX25898.1;QLL76253.1;PWT40134.1;PWT31230.1;sp|A5VKN2.2|RL19_LIMRD;QLQ62513.1;sp|B2G816.1|RL19_LIMRJ;ROV63445.1;UAW61808.1;UAW59452.1;TSB20947.1;TGY63986.1;TGY49146.1;TGB12138.1;UHC30555.1;UGQ31960.1;PWT31776.1;RNF37111.1;…	WP_019252471.1 50S ribosomal protein L19, partial [Limosilactobacillus reuteri];UXE88402.1 50S ribosomal protein L19 [Limosilactobacillus reuteri];UPG79173.1 50S ribosomal protein L19 [Limosilactobacillus reuteri];WP_003675625.1 MULTISPECIES: 50S ribosomal	159	10	10	10	62.7	11.749	30482000	31148000	30815000	35227000	28551000	31889000	0.966321	0.920607
ABQ83407.1	ABQ83407.1;WP_085649901.1;WP_229407367.1;WP_283577779.1;WP_273780910.1;WP_273774558.1;WP_229286384.1;WP_273773988.1;WP_271901279.1;WP_261296030.1;WP_260235085.1;WP_251672323.1;WP_229411991.1;WP_229398276.1;WP_229394007.1;WP_229303588.1;WP_229289410.1;WP_003668364.1;WP_003663802.1;UCN18236.1;WLC95061.1;WP_283581166.1;WP_273780180.1;UAW61809.1;OTA57028.1;OTA81936.1;OTA74965.1;OTA43217.1;AKP01363.1;…	ABQ83407.1 amino acid/polyamine/organocation transporter, APC superfamily [Limosilactobacillus reuteri subsp. reuteri];WP_085649901.1 amino acid permease [Limosilactobacillus reuteri];WP_229407367.1 amino acid permease [Limosilactobacillus reuteri];WP_2835	210	4	4	4	8.4	51.253	364630	416340	390485	248610	305380	276995	1.40972	0.621804
UFK69348.1	UFK69348.1;UIT54982.1;UHC30557.1;WP_085678741.1;UCN18235.1;UCN20001.1;WP_257525179.1;WP_229286385.1;WP_153703417.1;WP_153700784.1;WP_229272213.1;WP_229270587.1;WP_223659267.1;WP_181462803.1;WP_169478319.1;WP_162216407.1;WP_153704847.1;UGQ31962.1;UAW61810.1;UIN26200.1;UNL41596.1;PWT43325.1;UPG79175.1;OAV46626.1;KRK52313.1;OYT07753.1;VTZ91718.1;UZM91023.1;UYQ74325.1;WP_066035664.1;WP_035153214.1;WP…	UFK69348.1 tRNA (guanine-N(1)-)-methyltransferase (plasmid) [Limosilactobacillus reuteri];UIT54982.1 tRNA (guanosine(37)-N1)-methyltransferase TrmD [Limosilactobacillus reuteri];UHC30557.1 tRNA (guanosine(37)-N1)-methyltransferase TrmD [Limosilactobacillus	176	5	5	5	34.9	27.175	650010	582680	616345	796400	715220	755810	0.815476	0.542604
PWT37723.1	PWT37723.1;UAW59456.1;UCN18233.1;UCN19999.1;UGQ31964.1;UHC30559.1;WP_273773987.1;WP_216577673.1;UIN26198.1;WP_153703415.1;WP_134989122.1;WP_094512176.1;WP_086132476.1;WP_078009336.1;WP_019252467.1;WP_016496730.1;WP_003675631.1;UAW61812.1;TSB20951.1;TGY49142.1;WP_260235084.1;OTA45593.1;OTA44191.1;OTA43220.1;OJI11457.1;OAV46624.1;KRK52315.1;OFB59956.1;OCX48160.1;OCW70666.1;OCW68714.1;OCW67393.1;OCW…	PWT37723.1 KH domain-containing protein [Limosilactobacillus reuteri];UAW59456.1 KH domain-containing protein [Limosilactobacillus reuteri];UCN18233.1 KH domain-containing protein [Limosilactobacillus reuteri];UCN19999.1 KH domain-containing protein [Limos	181	4	4	4	45.3	9.7331	300770	316190	308480	226720	275290	251005	1.22898	0.809091
KRK52316.1	KRK52316.1;UZM91020.1;UHC30560.1;UGQ31965.1;WP_003663816.1;WLR79566.1;WLC95065.1;WJK31429.1;VTZ91709.1;UXE88407.1;UCN19998.1;UFK66816.1;UUW67643.1;UPG79178.1;UNL41593.1;UNL36246.1;UIT54985.1;UIN26197.1;UFK69351.1;WP_182590076.1;OTA82592.1;TGY63981.1;TGY49141.1;TGB12143.1;sp|B2G821.1|RS16_LIMRJ;UCN18232.1;UAW61813.1;UAW59457.1;TSB20952.1;sp|A5VKN7.1|RS16_LIMRD;QWS03370.1;QLQ62508.1;QPB66493.1;QLL7…	KRK52316.1 30S ribosomal protein S16 [Limosilactobacillus reuteri subsp. reuteri];UZM91020.1 30S ribosomal protein S16 [Limosilactobacillus reuteri];UHC30560.1 30S ribosomal protein S16 [Limosilactobacillus reuteri];UGQ31965.1 30S ribosomal protein S16 [Li	156	6	6	2	68.3	9.3367	44316000	51171000	47743500	50903000	59588000	55245500	0.864206	0.645344
ABQ83413.1	ABQ83413.1;UCN19996.1;UAW61815.1;UAW59459.1;TSB20954.1;UUW67645.1;sp|B2G823.1|Y1089_LIMRJ;TGB12145.1;VTZ91703.1;UZM91018.1;WP_003663818.1;WLR79564.1;WLC95067.1;WJK31431.1;TGY63979.1;sp|A5VKN9.1|Y1156_LIMRD;PIN30912.1;UCN18230.1;UXE88409.1;OCW68711.1;TGY49139.1;OCW65809.1;OCW63417.1;OAV46621.1;OYT02869.1;OYT07986.1;UHC30562.1;UGQ31967.1;UFK69353.1;UPG79180.1;UNL41591.1;UNL36248.1;UIT54987.1;UIN261…	ABQ83413.1 putative helix-turn-helix protein, YlxM/p13 family protein [Limosilactobacillus reuteri subsp. reuteri];UCN19996.1 putative DNA-binding protein [Limosilactobacillus reuteri];UAW61815.1 putative DNA-binding protein [Limosilactobacillus reuteri];U	160	5	5	5	72.6	13.716	526090	368940	447515	374780	366470	370625	1.20746	0.834296
ABQ83416.1	ABQ83416.1;OFB58582.1;UAW61818.1;UCN18227.1;sp|A5VKP2.1|RNC_LIMRD;ROV63455.1;PWT68435.1;QBE45812.1;OYS52269.1;PWT37717.1;OCW65806.1;OCW67399.1;OCW68708.1;OCW70672.1;OCX48154.1;OJI11451.1;TSB20957.1;OPG88301.1;KGE70484.1;KEQ20823.1;OTA45587.1;OTA47999.1;OTA48462.1;OTA57037.1;OTA61328.1;OTA66871.1;OAV46618.1;KRK52321.1;OTA43226.1;OTA44197.1;UAW59462.1;TGY63976.1;CUR44063.1;WP_169478321.1;UNL41589.1…	ABQ83416.1 RNAse III [Limosilactobacillus reuteri subsp. reuteri];OFB58582.1 ribonuclease III [Limosilactobacillus reuteri];UAW61818.1 ribonuclease III [Limosilactobacillus reuteri];UCN18227.1 ribonuclease III [Limosilactobacillus reuteri];sp|A5VKP2.1|RNC_	175	13	13	13	75.5	26.606	3822300	4473400	4147850	4008400	3853400	3930900	1.05519	0.881764
ABQ83417.1	ABQ83417.1;UIT54991.1;OYS98693.1;WJK31435.1;WLC95071.1;WP_283581165.1;WP_229272219.1;WP_086142455.1;WP_003663823.1;OYS93916.1;UAW59463.1;UNL36252.1;VTZ91690.1;UZM91014.1;UYQ74334.1;UXE88413.1;UUW67649.1;UPG79184.1;UHC30566.1;RMX25909.1;OYS92054.1;UCN18226.1;OYS93618.1;TGY63975.1;TSB20958.1;UGQ31971.1;UFK69357.1;UFK66822.1;UCN19992.1;UAW61819.1;RMX26155.1;QWS03376.1;QQR14536.1;UIN26191.1;TGY49135.…	ABQ83417.1 acyl carrier protein [Limosilactobacillus reuteri subsp. reuteri];UIT54991.1 acyl carrier protein [Limosilactobacillus reuteri];OYS98693.1 acyl carrier protein [Limosilactobacillus reuteri];WJK31435.1 acyl carrier protein [Limosilactobacillus re	158	4	4	4	53.6	9.4942	6724300	6273100	6498700	6716500	6072100	6394300	1.01633	0.959325
EEI10083.1	EEI10083.1;AKP01376.1;PWT37713.1;QWS03379.1;EGC14008.1;WP_260241332.1;WP_216270823.1;WP_011953503.1;UYQ74337.1;UNL41585.1;QBE45816.1;UNL36255.1;UHC30569.1;UGQ31974.1;UAW61822.1;UAW59466.1;TSB20961.1;ROV63459.1;ABQ83420.1;PWT69049.1;QPB66502.1;BAG25612.1;KRK52325.1;PWT66609.1;PWT63512.1;PWT59381.1;PWT58735.1;PWT54032.1;PWT45418.1;PWT41859.1;PWT40763.1;PWT35217.1;UPG79187.1;PWT33953.1;PWT31216.1;PT…	EEI10083.1 DAK2 domain fusion protein YloV [Limosilactobacillus reuteri MM2-3];AKP01376.1 Dak phosphatase [Limosilactobacillus reuteri];PWT37713.1 DAK2 domain-containing protein [Limosilactobacillus reuteri];QWS03379.1 DAK2 domain-containing protein [Limos	46	24	1	1	53.9	62.132	172480	286080	229280	129760	141560	135660	1.69011	0.408767
WP_169490265.1	WP_169490265.1;UCN18222.1;VTZ91674.1;WJK31439.1;WLR79556.1;WP_163622090.1;WP_153703964.1;PWT35218.1;WP_134989137.1;WP_086131423.1;WP_029507538.1;WP_003663831.1;UAW59467.1;UAW61823.1;TGY63971.1;PWT54031.1;PWT53852.1;OYT08111.1;UCN19988.1;PTV04701.1;UFK66826.1;OYT02861.1;OYT07978.1;UZM91010.1;UYQ74338.1;UHC30570.1;UXE88417.1;UUW67653.1;UPG79188.1;UNL41584.1;UNL36256.1;UIN26187.1;TSB20962.1;UGQ31975…	WP_169490265.1 Asp23/Gls24 family envelope stress response protein, partial [Limosilactobacillus reuteri];UCN18222.1 Asp23/Gls24 family envelope stress response protein [Limosilactobacillus reuteri];VTZ91674.1 hypothetical protein LREP572_01342 [Limosilact	161	3	3	3	50.9	12.082	1591100	1879700	1735400	1408200	2473800	1941000	0.894075	0.716176
ABQ83422.1	ABQ83422.1;OYS97630.1;WP_094512181.1;WP_003663833.1;WLR79555.1;WLC95076.1;WJK31440.1;VTZ91670.1;UZM91009.1;UYQ74339.1;UXE88418.1;UUW67654.1;UPG79189.1;UNL41583.1;UNL36257.1;UIT54996.1;UIN26186.1;UHC30571.1;UGQ31976.1;WP_134989139.1;UFK66827.1;UCN19987.1;UCN18221.1;UAW61824.1;UAW59468.1;TSB20963.1;TGY63970.1;TGY49130.1;TGB12154.1;sp|B2G832.1|RL28_LIMRJ;sp|A5VKP8.1|RL28_LIMRD;ROV63461.1;RNF37095.1;…	ABQ83422.1 LSU ribosomal protein L28P [Limosilactobacillus reuteri subsp. reuteri];OYS97630.1 50S ribosomal protein L28 [Limosilactobacillus reuteri];WP_094512181.1 50S ribosomal protein L28 [Limosilactobacillus reuteri];WP_003663833.1 MULTISPECIES: 50S ri	151	4	4	4	42.6	6.9271	2436400	2960500	2698450	3000700	2517200	2758950	0.978071	0.901158
ABQ83423.1	ABQ83423.1;KRK52328.1;PWT41856.1;PWT37710.1;OFB58577.1;AKP01379.1;BAG25615.1;CCC03895.1;CUU12379.1;PWT54029.1;EDX42433.1;EEI10080.1;EGC14011.1;UYQ74340.1;OTA81952.1;OAV46611.1;WP_153706067.1;UZM91008.1;OTA45580.1;OPG88308.1;AGN99015.1;PWT35220.1;PWT33950.1;PWT31213.1;PTV04699.1;PTS30694.1;PWT58732.1;PWT40760.1;PWT45415.1;ROV63462.1;WP_107721043.1;PWT59378.1;PWT63509.1;PWT66612.1;PWT69052.1;QBE458…	ABQ83423.1 thiamine diphosphokinase [Limosilactobacillus reuteri subsp. reuteri];KRK52328.1 thiamine pyrophosphokinase [Limosilactobacillus reuteri subsp. reuteri];PWT41856.1 thiamine diphosphokinase [Limosilactobacillus reuteri];PWT37710.1 thiamine diphos	186	4	4	4	30.1	24.536	64034	40184	52109	40373	26465	33419	1.55926	0.497615
EEI10079.1	EEI10079.1;KGE70492.1;OTA61336.1;OCW68808.1;OTA66879.1;OTA72762.1;OTA74982.1;OTA75493.1;OTA78419.1;OTA81953.1;OTA82579.1;OTA89877.1;OUL53329.1;OPG88309.1;OJI11443.1;OFB58576.1;AGN99014.1;AKP01380.1;AMY14936.1;BAG25616.1;CCC03896.1;CUR37661.1;CUR44071.1;CUU12378.1;OTA72007.1;OTA57045.1;OTA48454.1;OTA48007.1;WP_003663836.1;EGC14012.1;AGR64381.1;UNL36259.1;UNL41581.1;UPG79191.1;UUW67656.1;UXE88420.1…	EEI10079.1 ribulose-phosphate 3-epimerase [Limosilactobacillus reuteri MM2-3];KGE70492.1 ribulose-phosphate 3-epimerase [Limosilactobacillus reuteri];OTA61336.1 ribulose-phosphate 3-epimerase [Limosilactobacillus reuteri];OCW68808.1 ribulose-phosphate 3-ep	173	10	10	2	45	25.102	13453000	15457000	14455000	14206000	13949000	14077500	1.02682	0.938034
KRK52332.1	KRK52332.1;OCW62829.1;PTS16978.1;PTS30698.1;PWT31209.1;PWT33946.1;OPG88312.1;PWT35224.1;OJI11440.1;OCW68811.1;AGN99011.1;AGR64384.1;AKP01383.1;AMY14933.1;ANU51513.1;AXX73274.1;BAG25619.1;CCC03899.1;CUR37664.1;CUR38592.1;CUR40556.1;CUR44074.1;CUU12375.1;EEI10076.1;EGC14015.1;KGE70495.1;OAV46607.1;OXE60759.1;OUL53332.1;OTA89880.1;WP_109884502.1;ABQ83427.1;WP_229276677.1;WP_153702244.1;WP_169471011.…	KRK52332.1 protein phosphatase 2C-like protein [Limosilactobacillus reuteri subsp. reuteri];OCW62829.1 protein phosphatase [Limosilactobacillus reuteri];PTS16978.1 Stp1/IreP family PP2C-type Ser/Thr phosphatase [Limosilactobacillus reuteri];PTS30698.1 Stp1	200	5	5	5	29.1	28.63	625720	668850	647285	618130	508060	563095	1.14951	0.769634
ABQ83432.1	ABQ83432.1;UIN26177.1;TSB20973.1;UGQ31986.1;OYT02850.1;VTZ91630.1;WJK31450.1;WP_003663855.1;WLR79545.1;OYS97620.1;QQR14521.1;UIT55006.1;UZM91000.1;UYQ74349.1;UXE88428.1;UUW67664.1;UPG79199.1;UNL41573.1;RMX26140.1;RNF37085.1;ROV63471.1;sp|A5VKQ8.1|RPOZ_LIMRD;OUL53337.1;OYS93931.1;TGY49120.1;TGY63960.1;UFK69371.1;UFK66837.1;UCN19977.1;UCN18211.1;UAW61834.1;UAW59478.1;RMX25924.1;QWS03391.1;UHC30581.…	ABQ83432.1 DNA-directed RNA polymerase subunit omega [Limosilactobacillus reuteri subsp. reuteri];UIN26177.1 DNA-directed RNA polymerase subunit omega [Limosilactobacillus reuteri];TSB20973.1 DNA-directed RNA polymerase subunit omega [Limosilactobacillus r	158	9	9	9	93.1	7.9219	8001700	7654300	7828000	8826300	9354300	9090300	0.861138	0.637125
ABQ83433.1	ABQ83433.1;UPG79200.1;PWT63499.1;PWT64363.1;PWT41846.1;PWT49127.1;PTS30704.1;UHC30582.1;UUW67665.1;UNL41572.1;UNL36267.1;UXE88429.1;UYQ74350.1;UZM90999.1;VTZ91626.1;WJK31451.1;WP_003663856.1;OTA48016.1;WP_109897391.1;OYT08099.1;OYT07728.1;OCW61500.1;OCW62823.1;OCW64049.1;OCW67478.1;OCW68817.1;OCX48137.1;KRK52338.1;OTA61345.1;KGE70501.1;OTA43243.1;OTA44214.1;PWT59368.1;PWT58722.1;PWT54019.1;PWT538…	ABQ83433.1 guanylate kinase [Limosilactobacillus reuteri subsp. reuteri];UPG79200.1 guanylate kinase [Limosilactobacillus reuteri];PWT63499.1 guanylate kinase [Limosilactobacillus reuteri];PWT64363.1 guanylate kinase [Limosilactobacillus reuteri];PWT41846.	160	15	15	15	82	23.546	3342600	4460000	3901300	3446100	3730900	3588500	1.08717	0.820826
ABQ83437.1	ABQ83437.1;OTA44218.1;CUU12365.1;EEI10066.1;PWT66626.1;PWT35234.1;EGC14025.1;OFB58439.1;OJI11429.1;OPG88322.1;OTA44253.1;OTA82566.1;OTA45566.1;OTA48020.1;OTA57058.1;AGN99001.1;OAV46597.1;UCN18206.1;PTS16988.1;QDK48374.1;CUR44084.1;CUR37674.1;CCC03909.1;BAG25628.1;KRK52342.1;PWT33936.1;PWT38340.1;PWT40746.1;PWT41842.1;PWT45401.1;PWT54015.1;PWT58718.1;PWT59364.1;PWT63495.1;OTA72775.1;OTA74995.1;OTA…	ABQ83437.1 hemolysin A [Limosilactobacillus reuteri subsp. reuteri];OTA44218.1 TlyA family rRNA (cytidine-2-O)-methyltransferase [Limosilactobacillus reuteri];CUU12365.1 hemolysin TlyA family protein [Limosilactobacillus reuteri subsp. suis];EEI10066.1 ri	187	15	15	4	64.1	30.273	1285500	1088100	1186800	1389000	1609600	1499300	0.791569	0.491326
ABQ83439.1	ABQ83439.1;OTA75478.1;OTA45564.1;OTA48022.1;OTA48440.1;OTA57060.1;OTA61351.1;OTA66894.1;OTA72022.1;OTA72777.1;OTA74997.1;OCW62817.1;OCW61506.1;OTA44220.1;KRK52344.1;AGN98999.1;AKP01395.1;AMY14921.1;ANU51525.1;AWD62614.1;AXX73262.1;BAG25630.1;CCC03911.1;CUR37676.1;OTA44255.1;OPG88324.1;CUR44086.1;WP_122481764.1;UNL41566.1;UXE88435.1;UYQ74356.1;UZM90993.1;VTZ91601.1;WJK31457.1;WLR79538.1;WP_0036638…	ABQ83439.1 Exodeoxyribonuclease VII small subunit [Limosilactobacillus reuteri subsp. reuteri];OTA75478.1 exodeoxyribonuclease VII small subunit [Limosilactobacillus reuteri];OTA45564.1 exodeoxyribonuclease VII small subunit [Limosilactobacillus reuteri];O	168	3	3	3	32.3	10.268	246390	220900	233645	187060	246690	216875	1.07733	1
EEI10061.1	EEI10061.1;UNL41563.1;WP_003663865.1;WLR79535.1;WJK31460.1;VTZ91589.1;UZM90990.1;UYQ74359.1;UXE88438.1;WP_019254005.1;UNL36274.1;UPG79623.1;PTS16993.1;UIT55016.1;QIZ04572.1;QDR72294.1;QDK48369.1;PTS30713.1;UUW67674.1;OTA57063.1;WP_078009313.1;OCW61509.1;OTA44258.1;OCW67487.1;OTA44223.1;OPG88327.1;OON65752.1;OJI11424.1;OFB58434.1;OCX48128.1;OYT02840.1;OYS65065.1;WP_003672227.1;WP_011953504.1;WP_22…	EEI10061.1 transcription antitermination factor NusB [Limosilactobacillus reuteri MM2-3];UNL41563.1 transcription antitermination factor NusB [Limosilactobacillus reuteri];WP_003663865.1 MULTISPECIES: transcription antitermination factor NusB [Lactobacilla	175	5	5	5	38.3	16.148	2441900	2719000	2580450	2494600	2136800	2315700	1.11433	0.830831
ABQ83443.1	ABQ83443.1;TGB12175.1;TSB20984.1;UAW59489.1;UAW61845.1;QDK48368.1;UCN19967.1;QBE45839.1;QDR72293.1;PIN30941.1;PWT64353.1;OFB58433.1;OJI11423.1;OON65751.1;OPG88328.1;OTA44224.1;KRK52348.1;OTA44259.1;OTA48026.1;OTA48436.1;OTA57064.1;OTA61355.1;OTA66898.1;OTA72026.1;OTA72781.1;OTA45560.1;KGE70511.1;PWT66632.1;OCX48127.1;TGY49109.1;ROV63482.1;KEQ20797.1;RNF37074.1;UHC30592.1;UIN26166.1;UIT55017.1;UNL…	ABQ83443.1 protein of unknown function DUF322 [Limosilactobacillus reuteri subsp. reuteri];TGB12175.1 Asp23/Gls24 family envelope stress response protein [Limosilactobacillus reuteri];TSB20984.1 Asp23/Gls24 family envelope stress response protein [Limosila	166	10	10	10	80	15.835	9249900	9137400	9193650	7335100	6940200	7137650	1.28805	0.504095
ABQ83446.1	ABQ83446.1;VTZ91576.1;OJI11420.1;CCC03918.1;CUR37683.1;CUR44093.1;CUU12356.1;EEI10057.1;EGC14034.1;KGE70514.1;OAV46588.1;OCX48124.1;AMY14914.1;RNF37071.1;OPG88331.1;OTA44227.1;OTA44262.1;OTA45557.1;OTA48029.1;OTA48433.1;KRK52351.1;UZM90986.1;UYQ74363.1;WP_003668415.1;AKP01402.1;QPB66527.1;OTA75471.1;QKT15177.1;OTA72784.1;OTA78397.1;OTA81975.1;OTA82557.1;OTA84728.1;OUL53351.1;PTS16997.1;PTS30717.1…	ABQ83446.1 alanine racemase domain protein [Limosilactobacillus reuteri subsp. reuteri];VTZ91576.1 hypothetical protein LREP572_01317 [Limosilactobacillus reuteri];OJI11420.1 YggS family pyridoxal phosphate enzyme [Limosilactobacillus reuteri];CCC03918.1 p	207	13	13	13	76.2	26.995	1523000	1375900	1449450	968370	1267800	1118085	1.29637	0.549021
UAW61848.1	UAW61848.1;OTA61359.1;OCX48123.1;OJI11419.1;OPG88332.1;OTA43547.1;OTA44228.1;OTA44263.1;OTA48030.1;OTA48432.1;OTA57068.1;OAV46587.1;OCW67885.1;OTA66902.1;KEK14371.1;AGN98991.1;AGR64403.1;AKP01403.1;AMY14913.1;ANU51533.1;AXX75101.1;BAG25638.1;OCW69589.1;OCW67298.1;CUR37684.1;UPG79213.1;WP_019254008.1;WP_003664006.1;WLR79530.1;WJK31465.1;VTZ91573.1;UZM90985.1;UYQ74364.1;UXE88443.1;UUW67740.1;UNL415…	UAW61848.1 50S ribosomal protein L27 [Limosilactobacillus reuteri];OTA61359.1 50S ribosomal protein L27 [Limosilactobacillus reuteri];OCX48123.1 50S ribosomal protein L27 [Limosilactobacillus reuteri];OJI11419.1 50S ribosomal protein L27 [Limosilactobacill	153	4	4	4	48.4	9.9211	24673000	25374000	25023500	31329000	25006000	28167500	0.888382	0.710515
ABQ83449.1	ABQ83449.1;UZM90983.1;TGY49044.1;TGB12181.1;sp|B2G858.1|RL21_LIMRJ;ROV63488.1;UNL41556.1;UPG79215.1;UUW67742.1;WP_273774552.1;OTA61361.1;UXE88445.1;WP_003664009.1;WLR79528.1;WLC95103.1;WJK31467.1;VTZ91566.1;UYQ74366.1;TGY63943.1;TSB20990.1;UAW59561.1;UAW61850.1;OCW62836.1;OYS93948.1;OTA66904.1;OYS98725.1;OYT07950.1;UCN19961.1;OYT02833.1;UIT55023.1;UIN26161.1;UHC30598.1;UGQ32003.1;UFK69388.1;UFK66…	ABQ83449.1 LSU ribosomal protein L21P [Limosilactobacillus reuteri subsp. reuteri];UZM90983.1 50S ribosomal protein L21 [Limosilactobacillus reuteri];TGY49044.1 50S ribosomal protein L21 [Limosilactobacillus reuteri];TGB12181.1 50S ribosomal protein L21 [L	162	9	9	9	65.7	11.256	27826000	30737000	29281500	28596000	29512000	29054000	1.00783	0.976756
WP_273780162.1	WP_273780162.1;WP_229306461.1;WP_003668419.1;WLC95104.1;PIN30948.1;WJK31468.1;UZM90982.1;UXE88446.1;UUW67743.1;UPG79216.1;UNL36282.1;WP_016496720.1;UHC30599.1;WP_102816049.1;WP_134989180.1;WP_153704862.1;WP_229267958.1;WP_229284708.1;WP_229286410.1;WP_229272245.1;WP_003675677.1;WP_019252494.1;OTA44231.1;OCW67081.1;OPG88335.1;OJI11416.1;KRK52355.1;OCW69586.1;OUN50046.1;OCW67301.1;WP_094502470.1;UY…	WP_273780162.1 TetR/AcrR family transcriptional regulator [Limosilactobacillus reuteri];WP_229306461.1 TetR/AcrR family transcriptional regulator [Limosilactobacillus reuteri];WP_003668419.1 MULTISPECIES: TetR/AcrR family transcriptional regulator [Lactoba	186	8	8	8	42.2	24.818	829380	884410	856895	945100	807580	876340	0.977811	0.900596
WP_094560348.1	WP_094560348.1;OYS82300.1;QWS03416.1;RNF37063.1;ROV63492.1;TGY62924.1;TSB20995.1;UAW61508.1;WP_019252490.1;UCN19956.1;WP_187403649.1;WP_174891909.1;WP_134989189.1;WP_085678805.1;PWT60900.1;WP_257496861.1;PTS30725.1;OYS47929.1;OTA57075.1;OTA61366.1;OTA66909.1;OTA72037.1;OTA72792.1;OTA75012.1;OTA77286.1;OTA78389.1;OTA81983.1;OTA82549.1;OTA84720.1;OUN50050.1;OUP90413.1;OYS46064.1;QPB66535.1;QLQ62465…	WP_094560348.1 metal-sulfur cluster assembly factor, partial [Limosilactobacillus reuteri];OYS82300.1 DNA methyltransferase [Limosilactobacillus reuteri];QWS03416.1 metal-sulfur cluster assembly factor [Limosilactobacillus reuteri];RNF37063.1 metal-sulfur	169	3	3	3	27.5	11.501	337490	357700	347595	650760	740430	695595	0.499709	0.137508
ABQ83457.1	ABQ83457.1;UNL41523.1;EEI10154.1;EGC14047.1;KEK14381.1;PWT38359.1;KEQ20784.1;OAV46578.1;OFB58423.1;PTS17007.1;PTS30728.1;PTV04666.1;PWT33862.1;KRK52362.1;UHC30606.1;ROV63495.1;UPG79222.1;EDX42539.1;BAG25649.1;AKP01413.1;QPB66538.1;PWT60864.1;PWT65231.1;PWT45327.1;PWT55208.1;PWT60081.1;PWT69407.1;QWS03499.1;PWT35707.1;RMX26115.1;TSB20998.1;UAW61858.1;QBE45852.1;UGQ32011.1;PWT41401.1;PWT42551.1;PWT…	ABQ83457.1 aminotransferase [Limosilactobacillus reuteri subsp. reuteri];UNL41523.1 aminotransferase class I/II-fold pyridoxal phosphate-dependent enzyme [Limosilactobacillus reuteri];EEI10154.1 aminotransferase, class I/II [Limosilactobacillus reuteri MM2	151	12	12	1	31	43.367	1553800	1571700	1562750	881920	749760	815840	1.91551	0.11091
PWT55213.1	PWT55213.1;OCW66115.1;WP_065533099.1;WP_228341721.1;WP_169478266.1;WP_152699761.1;WP_152697142.1;WP_094502419.1;WP_085719317.1;WP_003672480.1;WLR79452.1;WP_003668438.1;WP_078009301.1;QIZ04618.1;PWT46108.1;PWT50428.1;PWT45322.1;WJK31551.1;PWT42556.1;PWT38364.1;OTA61374.1;OCW68543.1;OCX46922.1;OTA72799.1;OYS98398.1;PWT41406.1;OTA66917.1;OTA57082.1;OFB58420.1;OTA51695.1;OTA49782.1;OTA48045.1;OPG8834…	PWT55213.1 rhodanese-like domain-containing protein [Limosilactobacillus reuteri];OCW66115.1 sulfurtransferase [Limosilactobacillus reuteri];WP_065533099.1 rhodanese-like domain-containing protein [Limosilactobacillus reuteri];WP_228341721.1 rhodanese-like	172	7	7	7	38.1	16.242	1269200	1053300	1161250	1004000	794760	899380	1.29117	0.555872
WP_029507917.1	WP_029507917.1;ROV63730.1;UNL41516.1;UUW67759.1;UPG79229.1;WP_152709882.1;WP_035156913.1;WP_003668441.1;WLR79450.1;UNL36294.1;WLC95116.1;WJK31553.1;VTZ92081.1;UZM90966.1;UYQ74383.1;UXE88523.1;RNF37053.1;UIT55039.1;TGB12196.1;OYS98400.1;TGY48000.1;OTA85328.1;UCN19946.1;UCN18179.1;UAW61865.1;UIN26145.1;UHC30613.1;UGQ32018.1;UFK69016.1;UFK64682.1;UAW59576.1;RMX25956.1;RMX26108.1;QWS03506.1;TSB21005.…	WP_029507917.1 YqgQ family protein [Limosilactobacillus reuteri];ROV63730.1 DUF910 family protein [Limosilactobacillus reuteri];UNL41516.1 YqgQ family protein [Limosilactobacillus reuteri];UUW67759.1 YqgQ family protein [Limosilactobacillus reuteri];UPG792	156	2	2	2	27.4	8.7019	414030	330500	372265	494340	314420	404380	0.920582	0.761155
ABQ83467.1	ABQ83467.1;UFK64684.1;WP_003664049.1;WLR79447.1;WLC95120.1;WJK31556.1;VTZ92091.1;UZM90963.1;UYQ74386.1;UXE88526.1;UUW67762.1;UPG79232.1;UNL41513.1;UNL36295.1;UIT55042.1;UIN26142.1;UHC30616.1;UGQ32021.1;UFK69014.1;OYS94939.1;UCN19944.1;UCN18177.1;UAW61868.1;UAW59579.1;TSB21008.1;TGY64075.1;TGY48003.1;TGB12199.1;sp|B2G877.1|RL332_LIMRJ;sp|A5VKU3.1|RL33_LIMRD;ROV63733.1;RNF37051.1;RMX26105.1;RMX2595…	ABQ83467.1 LSU ribosomal protein L33P [Limosilactobacillus reuteri subsp. reuteri];UFK64684.1 50S ribosomal protein L33 1 [Limosilactobacillus reuteri];WP_003664049.1 MULTISPECIES: 50S ribosomal protein L33 [Lactobacillaceae];WLR79447.1 50S ribosomal prote	149	2	2	2	46.9	5.9998	11110000	8924300	10017150	13444000	10638000	12041000	0.83192	0.559783
ABQ83471.1	ABQ83471.1;PWT69421.1;QDK48292.1;QDR72264.1;PWT55222.1;PWT60850.1;PWT31101.1;UIN26135.1;UPG79236.1;UNL36299.1;UIT55048.1;UXE88533.1;UYQ74390.1;WJK31560.1;WLR79442.1;WP_003664064.1;UNL41509.1;PTS17021.1;PTM26689.1;KRK52375.1;OAV46564.1;OCW61869.1;OCW65508.1;OCW66106.1;OCW68177.1;KEQ20770.1;OTA63840.1;KEK16868.1;OJI11394.1;OON65726.1;OTA46254.1;QBE45866.1;PWT67126.1;OTA52855.1;PWT65245.1;QWS03513.1…	ABQ83471.1 transcription elongation factor GreA [Limosilactobacillus reuteri subsp. reuteri];PWT69421.1 transcription elongation factor GreA [Limosilactobacillus reuteri];QDK48292.1 transcription elongation factor GreA [Limosilactobacillus reuteri];QDR7226	160	11	11	11	80.4	18.019	8940100	12871000	10905550	6745100	9634900	8190000	1.33157	0.450489
PWT50191.1	PWT50191.1;PWT55223.1;OJI11393.1;OFB56544.1;OYS64164.1;OCW68553.1;OTA89727.1;PWT60096.1;RMX25964.1;OAV46563.1;QWS03514.1;TGY48008.1;TGB12204.1;sp|B2G882.1|URK_LIMRJ;sp|A5VKU8.1|URK_LIMRD;ROV63738.1;OPG88283.1;OTA44927.1;OTA46253.1;OTA49532.1;OTA49791.1;OTA52856.1;OCX46932.1;OTA63374.1;OTA66927.1;OTA71345.1;OTA74497.1;OTA75270.1;OTA76660.1;OTA80851.1;OCW66105.1;OTA83426.1;OTA63839.1;RNF37046.1;RMX…	PWT50191.1 uridine kinase [Limosilactobacillus reuteri];PWT55223.1 uridine kinase [Limosilactobacillus reuteri];OJI11393.1 uridine kinase [Limosilactobacillus reuteri];OFB56544.1 uridine kinase [Limosilactobacillus reuteri];OYS64164.1 uridine kinase [Limos	181	9	9	9	60.4	24.977	2964600	3969900	3467250	2429300	4387800	3408550	1.01722	0.9575
ABQ83477.1	ABQ83477.1;WLC95131.1;UYQ74396.1;UZM90952.1;VTZ92645.1;WP_229277879.1;WP_216577647.1;WP_229304447.1;WP_152711758.1;WJK31566.1;TSB21018.1;WP_144226742.1;WP_085719321.1;WP_078009294.1;WP_003668459.1;WP_003664082.1;WLR79436.1;TGB12209.1;TGY64084.1;UAW59589.1;OCW61863.1;UNL41503.1;OYT01801.1;RNF37041.1;OYT06429.1;UHC30626.1;UXE88539.1;UUW67772.1;UPG79242.1;UNL36304.1;UAW61878.1;UIT55054.1;UIN26129.1;…	ABQ83477.1 metal dependent phosphohydrolase [Limosilactobacillus reuteri subsp. reuteri];WLC95131.1 HD domain-containing protein [Limosilactobacillus reuteri];UYQ74396.1 HD domain-containing protein [Limosilactobacillus reuteri];UZM90952.1 HD domain-contai	163	4	4	4	34.5	19.852	33791	23725	28758	30669	85163	57916	0.496547	0.134288
WP_003668462.1	WP_003668462.1;EGC14068.1;OTA73272.1;OTA74067.1;OTA76666.1;OTA77513.1;OTA83432.1;OTA89046.1;OTA89733.1;OUN48559.1;OUP89628.1;OXE60705.1;OYS46040.1;OYS46583.1;OYS47953.1;OTA44921.1;OYS51165.1;OPG88274.1;OJI11387.1;AKP01433.1;AMY14789.1;ANU51566.1;AXX75021.1;BAG25670.1;CCC03953.1;CUR37245.1;CUR39329.1;CUR41655.1;CUU12320.1;OTA71351.1;OTA66933.1;OTA63380.1;WP_113897516.1;WP_289218603.1;WP_229408870.…	WP_003668462.1 RNA methyltransferase [Limosilactobacillus reuteri];EGC14068.1 RNA methyltransferase, TrmH family [Limosilactobacillus reuteri MM4-1A];OTA73272.1 RNA methyltransferase [Limosilactobacillus reuteri];OTA74067.1 RNA methyltransferase [Limosilac	201	12	12	12	55.8	28.31	5607200	5667700	5637450	6821500	6041100	6431300	0.876565	0.678583
PWT60103.1	PWT60103.1;OJI11386.1;CUU12319.1;EEI10132.1;EGC14069.1;KGE70551.1;AKP01434.1;KRK52383.1;OCX46939.1;OFB59696.1;OPG88275.1;CCC03954.1;OTA44920.1;OTA46246.1;OTA49539.1;PWT55230.1;OAV46556.1;OTA49798.1;OTA73271.1;PWT65253.1;CUR41657.1;BAG25671.1;OTA77514.1;PWT41423.1;OTA89045.1;OTA63381.1;OTA89734.1;PTS30750.1;PWT31093.1;PWT33840.1;PWT35729.1;PWT38381.1;PWT42573.1;AMY14788.1;PWT45305.1;PTS17029.1;OTA…	PWT60103.1 acylphosphatase [Limosilactobacillus reuteri];OJI11386.1 acylphosphatase [Limosilactobacillus reuteri];CUU12319.1 acylphosphatase [Limosilactobacillus reuteri subsp. suis];EEI10132.1 acylphosphatase [Limosilactobacillus reuteri MM2-3];EGC14069.1	182	3	3	3	58.2	10.311	194180	170710	182445	194800	160080	177440	1.02821	0.928116
ABQ83483.1	ABQ83483.1;CCC03958.1;OTA89041.1;OTA83437.1;OTA77518.1;OTA76671.1;OTA71356.1;OYS91809.1;OTA63385.1;OTA59791.1;OTA50974.1;QKT15058.1;ROV63749.1;QQR14468.1;QWS03526.1;OAV46694.1;RMX25975.1;OTA89738.1;OXE60700.1;OYS46035.1;OTA44916.1;AWD62667.1;OYS51160.1;ANU52519.2;AMY14784.1;AKP01438.1;AGN98953.1;OTA49543.1;OYS46578.1;OYS54183.1;OTA49802.1;OYS52142.1;OYS47958.1;OTA74072.1;QPB66564.1;UHC30632.1;WP_…	ABQ83483.1 amino acid/polyamine/organocation transporter, APC superfamily [Limosilactobacillus reuteri subsp. reuteri];CCC03958.1 amino acid transport protein [Limosilactobacillus reuteri subsp. suis];OTA89041.1 glutamate/gamma-aminobutyrate family transpo	196	3	3	3	10.5	54.672	343290	425370	384330	173580	203920	188750	2.03619	0.24289
ABQ83486.1	ABQ83486.1;VTZ92672.1;UIN26119.1;UHC30635.1;WP_134907026.1;WP_003664092.1;WLR79426.1;WLC95140.1;WJK31575.1;UYQ74405.1;UFK64704.1;UFK68996.1;UXE88548.1;UUW67782.1;UPG79251.1;UNL41494.1;UNL36313.1;UIT55064.1;UGQ32040.1;OTA83440.1;OTA89038.1;TSB21027.1;TGY64093.1;TGY48022.1;TGB12218.1;UCN19925.1;UCN18158.1;UAW61885.1;UAW59598.1;sp|B2G896.1|RL32_LIMRJ;RMX25978.1;QPB66567.1;QQR14465.1;QLQ61266.1;sp|A5…	ABQ83486.1 LSU ribosomal protein L32P [Limosilactobacillus reuteri subsp. reuteri];VTZ92672.1 50S ribosomal protein L32 [Limosilactobacillus reuteri];UIN26119.1 50S ribosomal protein L32 [Limosilactobacillus reuteri];UHC30635.1 50S ribosomal protein L32 [L	156	5	5	5	52.5	6.5727	1976100	2308900	2142500	2264800	2528100	2396450	0.894031	0.716077
ABQ83487.1	ABQ83487.1;OTA49547.1;QPB66568.1;RMX25979.1;QLQ61265.1;OYS69311.1;QIZ04642.1;OTA49807.1;OTA63389.1;OTA71360.1;OTA83441.1;OTA89037.1;OTA89743.1;OTA44912.1;OFB59702.1;OUL53200.1;AMY14780.1;OYS51156.1;OYS53925.1;OYS54179.1;OYS59140.1;OYS59813.1;OYS61339.1;OYS46031.1;OYS47585.1;OYS47962.1;OPG88253.1;OCX46946.1;OYS64582.1;AGR64447.1;OYS68026.1;UCN18157.1;UAW61886.1;UAW59599.1;WJK31576.1;WLR79425.1;WP_…	ABQ83487.1 protein of unknown function DUF177 [Limosilactobacillus reuteri subsp. reuteri];OTA49547.1 DNA-binding protein [Limosilactobacillus reuteri];QPB66568.1 DUF177 domain-containing protein [Limosilactobacillus reuteri];RMX25979.1 DNA-binding protein	178	9	9	9	68.1	20.961	4177600	4428800	4303200	3175700	3082700	3129200	1.37518	0.401738
CCC03963.1	CCC03963.1;CUR37165.1;UCN19923.1;UCN18156.1;AMY14779.1;AKP01443.1;AGN98948.1;OTA76676.1;OTA89036.1;PWT65262.1;UAW61887.1;UAW59600.1;TSB21029.1;sp|A5VKW4.1|TMCAL_LIMRD;ROV63754.1;UGQ32042.1;RNF37030.1;QWS03531.1;QPB66569.1;OTA44911.1;OTA76643.1;OTA74077.1;OPG88254.1;CUU12310.1;EEI10123.1;EGC14078.1;KRK52392.1;OAV46548.1;OJI11377.1;OTA83442.1;OTA46237.1;OTA73262.1;OTA49548.1;OTA49808.1;OTA50979.1;O…	CCC03963.1 conserved hypothetical protein [Limosilactobacillus reuteri subsp. suis];CUR37165.1 FIG007079: UPF0348 protein family [Limosilactobacillus reuteri];UCN19923.1 nucleotidyltransferase [Limosilactobacillus reuteri];UCN18156.1 nucleotidyltransferase	231	6	6	6	21	44.056	93392	96728	95060	102730	63390	83060	1.14447	0.911683
ABQ83493.1	ABQ83493.1;UYQ74412.1;UUW67789.1;WP_136000879.1;WP_134907038.1;WP_273780148.1;WP_242079338.1;WP_229392819.1;WP_122481790.1;UXE88555.1;UNL41487.1;WP_003664099.1;WLR79419.1;WLC95147.1;WJK31582.1;VTZ92693.1;UZM90935.1;RMX26079.1;UPG79258.1;ROV63759.1;OYS96520.1;UFK68989.1;OYT01817.1;UCN19918.1;UNL36319.1;UIT55071.1;UIN26112.1;UHC30642.1;UGQ32047.1;UFK64711.1;TGB12225.1;UCN18151.1;RNF37025.1;UAW61892…	ABQ83493.1 protein of unknown function UPF0044 [Limosilactobacillus reuteri subsp. reuteri];UYQ74412.1 ribosome assembly RNA-binding protein YhbY [Limosilactobacillus reuteri];UUW67789.1 ribosome assembly RNA-binding protein YhbY [Limosilactobacillus reute	161	5	5	5	56.3	11.655	3767100	4019000	3893050	3650700	3496900	3573800	1.08933	0.816802
ABQ83495.1	ABQ83495.1;OTA46230.1;BAG25688.1;CCC03970.1;CUU12303.1;KEQ20747.2;OAV46541.1;OFB59499.1;OTA73255.1;OJI11370.1;OTA44904.1;OTA49815.1;QKT15045.1;OTA50986.1;OTA59803.1;OTA63397.1;OTA66950.1;OPG88261.1;QDK48267.1;PWT69445.1;AMY14772.1;OTA49555.1;AKP01450.1;OTA71368.1;OTA74084.1;OTA76683.1;UPG79260.1;OTA83449.1;OTA89029.1;OTA89751.1;PTS17045.1;PTS30766.1;PWT31077.1;PWT33824.1;OTA76636.1;QPB66576.1;PWT…	ABQ83495.1 HAD superfamily (subfamily IIIA) phosphatase, TIGR01668 [Limosilactobacillus reuteri subsp. reuteri];OTA46230.1 HAD family hydrolase [Limosilactobacillus reuteri];BAG25688.1 hydrolase [Limosilactobacillus reuteri subsp. reuteri JCM 1112];CCC0397	189	8	8	8	60.2	20.274	1325400	1247800	1286600	974680	1603700	1289190	0.997991	0.943835
WP_003664106.1	WP_003664106.1;UZM90931.1;UCN18147.1;UGQ32051.1;UCN19914.1;UFK64718.1;WLC95151.1;WJK31586.1;VTZ92703.1;UYQ74416.1;UFK68982.1;UUW67793.1;QKT15043.1;UPG79262.1;UNL41483.1;UNL36324.1;UIT55075.1;UIN26108.1;UAW61896.1;QLL76341.1;QPB66578.1;QQR14454.1;sp|B2G8A8.1|RL35_LIMRJ;QLQ62641.1;ROV63763.1;UAW59609.1;TSB21038.1;TGY64104.1;TGY48033.1;TGB12229.1;sp|A5VKX3.1|RL35_LIMRD;OYS94594.1;RNF37021.1;OYS90211…	WP_003664106.1 MULTISPECIES: 50S ribosomal protein L35 [Lactobacillaceae];UZM90931.1 50S ribosomal protein L35 [Limosilactobacillus reuteri];UCN18147.1 50S ribosomal protein L35 [Limosilactobacillus reuteri];UGQ32051.1 50S ribosomal protein L35 [Limosilact	154	1	1	1	13.8	7.615	775620	934800	855210	29763	783990	406876	2.10189	0.0671403
UNL36333.1	UNL36333.1;OFB59508.1;WP_019253107.1;WP_003670847.1;WP_094529292.1;WP_163622034.1;WP_094560699.1;WP_216578069.1;WP_229268866.1;WP_271901060.1;WP_257525391.1;WP_229304446.1;WP_229286432.1;WP_229278548.1;WP_229273665.1;WP_229271722.1;WP_229270731.1;WP_003668494.1;WP_003664121.1;WLR79406.1;QIZ04660.1;WP_035156962.1;WP_079376109.1;WP_085649688.1;WP_142490453.1;OCW71204.1;OCW70537.1;PTM29659.1;OYS5113…	UNL36333.1 BAX inhibitor (BI)-1/YccA family protein, partial [Limosilactobacillus reuteri];OFB59508.1 hypothetical protein BAY40_03225 [Limosilactobacillus reuteri];WP_019253107.1 Bax inhibitor-1/YccA family protein [Limosilactobacillus reuteri];WP_0036708	189	3	3	3	33.8	8.0614	2994700	4551700	3773200	4008000	1763400	2885700	1.30755	0.479445
AEI56480.1	AEI56480.1;OCW65437.1;UFK64730.1;UUW67805.1;UPG79274.1;UNL41471.1;ABQ83509.1;OYS86654.1;EGC14099.1;QDR72225.1;OFB59984.1;OJI11354.1;OPG88215.1;OTA44888.1;OTA49571.1;OTA49831.1;OTA51002.1;OCX46970.1;OTA59819.1;OTA66966.1;OTA71384.1;OTA73239.1;OTA74100.1;OTA76620.1;OTA76699.1;OTA63413.1;QDK48251.1;OTA89013.1;OCW71209.1;UXE88571.1;UZM90917.1;VTZ92740.1;ROV63775.1;UIN26096.1;UFK68970.1;PTS30780.1;WJK…	AEI56480.1 thioredoxin [Limosilactobacillus reuteri SD2112];OCW65437.1 thiol reductase thioredoxin [Limosilactobacillus reuteri];UFK64730.1 Thioredoxin-like protein YtpP [Limosilactobacillus reuteri];UUW67805.1 thioredoxin family protein [Limosilactobacill	170	7	7	7	62.4	12.828	5659500	6982700	6321100	4336000	4494300	4415150	1.43168	0.345477
ABQ83511.1	ABQ83511.1;EGC14101.1;OCW70530.1;AGR64470.1;AKP01466.1;BAG25704.1;CCC03987.1;CUR37191.1;CUU12285.1;EDX42596.1;OCW65435.1;AGN98922.1;EEI10100.1;KEK15118.1;WP_035153062.1;KGE70584.1;KRK52415.1;OAV46525.1;OCW63842.1;OCW64606.1;PTV04610.1;WP_153704917.1;PWT29739.1;KEQ20730.1;PWT41455.1;OTA76701.1;OCW71211.1;WJK31602.1;OTA74102.1;WP_229279870.1;WP_251672233.1;WP_260240747.1;WP_229280709.1;WP_229279293…	ABQ83511.1 L-glutaminase [Limosilactobacillus reuteri subsp. reuteri];EGC14101.1 glutaminase A [Limosilactobacillus reuteri MM4-1A];OCW70530.1 glutaminase A [Limosilactobacillus reuteri];AGR64470.1 glutaminase [Limosilactobacillus reuteri TD1];AKP01466.1 L	178	7	7	7	32.4	33.392	403140	440390	421765	389360	302160	345760	1.21982	0.819742
UPG79282.1	UPG79282.1;OAV47532.1;EEI10195.1;WP_003668509.1;UHC30666.1;UGQ32071.1;QPB66598.1;QBE45912.1;PTS28788.1;ABQ83518.1;OFB59922.1;PTS15630.1;EGC14107.1;KRK49726.1;AKP01473.1;BAG25711.1;OCW64610.1;OYS49946.1;KGE70587.1;UFK68964.1;UFK64736.1;WP_273780953.1;WP_086142138.1;WP_086131533.1;WP_003675779.1;WP_094502719.1;WP_094507940.1;WP_094528824.1;WP_003670840.1;OCW65431.1;CUR41745.1;OTA49577.1;OCW70526.1;…	UPG79282.1 ABC transporter permease [Limosilactobacillus reuteri];OAV47532.1 ABC transporter [Limosilactobacillus reuteri];EEI10195.1 bacterial ABC transporter protein EcsB [Limosilactobacillus reuteri MM2-3];WP_003668509.1 ABC transporter permease [Limosi	229	4	4	4	12.5	46.283	687080	619160	653120	645680	526290	585985	1.11457	0.830403
CUR41770.1	CUR41770.1;OTA49846.1;OYS95164.1;OYS59618.1;OYS63293.1;OYS70455.1;OYS95954.1;OTA51018.1;AMY14741.1;BAG25721.1;CCC04003.1;CUR37209.1;CUU12268.1;EDX42614.1;EEI10185.1;EGC14117.1;OTA59835.1;AKP01483.1;KEK14444.1;OAV47522.1;OFB58464.1;OJI11338.1;OON65335.1;OPG88231.1;OTA44872.1;OYS91454.1;OYS88285.1;OYS87663.1;OTA76715.1;WP_216270968.1;WP_229277859.1;WP_229409283.1;WP_152699826.1;WP_152111252.1;WP_16…	CUR41770.1 Phosphomethylpyrimidine kinase [Limosilactobacillus reuteri];OTA49846.1 bifunctional hydroxymethylpyrimidine kinase/phosphomethylpyrimidine kinase [Limosilactobacillus reuteri];OYS95164.1 hydroxymethylpyrimidine/phosphomethylpyrimidine kinase [L	194	9	1	1	48.8	27.276	662320	717070	689695	411450	468730	440090	1.56717	0.278966
ABQ83529.1	ABQ83529.1;PWT41253.1;PTS15641.1;PTS28799.1;PWT53759.1;AGN98903.1;AKP01484.1;ANU51612.1;BAG25722.1;CCC04004.1;CUR37210.1;CUR41772.1;CUU12267.1;EEI10184.1;OTA44871.1;KEK14445.1;KEK15108.1;AGR64482.1;KGE70598.1;OCW63827.1;OCW64621.1;OCW65420.1;OCW70515.1;OCW71226.1;OFB58465.1;EGC14118.1;OPG88232.1;OTA46197.1;PWT38698.1;OTA83242.1;WP_285227800.1;WP_257496717.1;WP_229392808.1;WP_229410477.1;WP_229279…	ABQ83529.1 malate dehydrogenase (NAD) [Limosilactobacillus reuteri subsp. reuteri];PWT41253.1 L-lactate dehydrogenase [Limosilactobacillus reuteri];PTS15641.1 L-lactate dehydrogenase [Limosilactobacillus reuteri];PTS28799.1 L-lactate dehydrogenase [Limosil	206	8	8	3	34.3	33.353	1182700	1432800	1307750	1060800	1059200	1060000	1.23373	0.6362
PWT64442.1	PWT64442.1;OTA63430.1;OYS61793.1;OYS65575.1;OCW71227.1;OCX47293.1;OFB58466.1;OJI11336.1;OPG88233.1;OTA46196.1;OTA49589.1;OYS60661.1;OTA54060.1;OTA75836.1;RNF36989.1;OTA76717.1;OTA81220.1;OTA83243.1;OTA83483.1;OCW70514.1;OTA62486.1;OCW65419.1;OCW64622.1;OCW63826.1;AMY14739.1;AWD62730.1;UHC30678.1;UXE88592.1;BAG25723.1;UZM90895.1;WP_134906669.1;PWT53884.1;PWT49181.1;UYQ74446.1;WP_132140018.1;WP_003…	PWT64442.1 hypothetical protein DKZ32_01220 [Limosilactobacillus reuteri];OTA63430.1 hypothetical protein BHL93_00690 [Limosilactobacillus reuteri];OYS61793.1 hypothetical protein CBF91_04165 [Limosilactobacillus reuteri];OYS65575.1 hypothetical protein CB	163	8	8	8	66.7	10.744	5560100	6400700	5980400	6649100	5819100	6234100	0.959304	0.901952
ABQ83535.1	ABQ83535.1;OYS73657.1;OYS77356.1;OYS79186.1;OYS82514.1;UZM90890.1;OTA81215.1;OYS85726.1;OTA76722.1;OTA62491.1;AGN98897.1;AKP01490.1;AMY14733.1;AXX74963.1;BAG25727.1;CCC04009.1;CUR37216.1;CUR41786.1;CUU12261.1;EDX42621.1;EEI10178.1;EGC14124.1;KEK15102.1;KEQ20710.1;KRK49709.1;OAV47515.1;OFB58469.1;OYS76011.1;OYS71817.1;OPG88238.1;OYS70975.1;WP_003664184.1;WP_016496681.1;WP_086132403.1;WP_094504132.…	ABQ83535.1 GTP cyclohydrolase I [Limosilactobacillus reuteri subsp. reuteri];OYS73657.1 GTP cyclohydrolase I FolE [Limosilactobacillus reuteri];OYS77356.1 GTP cyclohydrolase I FolE [Limosilactobacillus reuteri];OYS79186.1 GTP cyclohydrolase I FolE [Limosil	201	8	8	8	46.4	22.03	987780	1116300	1052040	623100	880720	751910	1.39916	0.427388
OCW64640.1	OCW64640.1;UFK64786.1;CUR39939.1;OJI11320.1;OFB58480.1;AGN98885.1;AKP01502.1;AMY14722.1;AWD62748.1;CUR37517.1;CUR40520.1;CUR41914.1;EDX42635.1;OCW71245.1;KEK15088.2;KEQ20697.2;KRK49697.1;OAV47503.1;OCW63808.1;OCW65401.1;OCW70496.1;OTA76733.1;CUU12249.1;QLQ62598.1;OTA62502.1;OTA60193.1;WP_035159876.1;OTA74172.1;OTA42626.1;OTA44855.1;OTA83499.1;OTA49605.1;OTA51403.1;OTA46180.1;ABQ83547.1;OON65354.1…	OCW64640.1 universal stress protein UspA [Limosilactobacillus reuteri];UFK64786.1 Putative universal stress protein [Limosilactobacillus reuteri];CUR39939.1 Universal stress protein family [Limosilactobacillus reuteri subsp. porcinus];OJI11320.1 universal	177	7	7	7	57	17.954	27951000	28017000	27984000	17202000	16077000	16639500	1.68178	0.172976
KRK46773.1	KRK46773.1;PWT31260.1;AKP01512.1;AMY14713.1;BAG25748.1;CCC04030.1;CUR37153.1;CUR41938.1;OPG88190.1;OCW61459.1;OTA44658.1;OCW61702.1;OCW63921.1;OCW70487.1;OCW71434.1;OFB56517.1;OJI11311.1;CUU12240.1;AGN98876.1;OTA46353.1;EEI10218.1;OTA73365.1;ABQ83557.1;PWT32231.1;OTA49614.1;OTA51412.1;OTA60202.1;OTA62511.1;OTA62940.1;OTA74163.1;OTA75811.1;OTA77415.1;OTA79931.1;OTA83267.1;OTA83508.1;OTA85035.1;PTS…	KRK46773.1 Fur family transcriptional regulator [Limosilactobacillus reuteri subsp. reuteri];PWT31260.1 transcriptional repressor [Limosilactobacillus reuteri];AKP01512.1 ferric uptake regulator family protein [Limosilactobacillus reuteri];AMY14713.1 trans	163	5	5	5	49.7	19.842	1206200	1275000	1240600	1616200	1372600	1494400	0.830166	0.574603
ABQ83558.1	ABQ83558.1;WP_153703010.1;WP_153701207.1;WP_152738522.1;WP_152717784.1;WP_152712199.1;WP_142499123.1;WP_136001960.1;WP_135951481.1;WP_229284660.1;WP_229287395.1;WP_229288440.1;WP_229305183.1;WP_229408351.1;WP_285143074.1;WP_283578237.1;WP_273780111.1;WP_261296097.1;WP_257525304.1;WP_257497219.1;WP_229411733.1;WP_229410489.1;WP_229398667.1;OON65364.1;OJI11310.1;WP_153701643.1;WP_153705936.1;UNL413…	ABQ83558.1 D-serine/D-alanine/glycine:proton symporter, AAT family [Limosilactobacillus reuteri subsp. reuteri];WP_153703010.1 amino acid permease [Limosilactobacillus reuteri];WP_153701207.1 amino acid permease [Limosilactobacillus reuteri];WP_152738522.1	227	3	3	3	10.7	48.745	67122	76765	71943.5	91371	86386	88878.5	0.809459	0.580499
ABQ83560.1	ABQ83560.1;UXE88620.1;UAW61951.1;WP_229392901.1;WP_003664220.1;WLR79330.1;WLC95209.1;WJK31648.1;VTZ92265.1;UZM90867.1;UYQ74476.1;UUW67851.1;QWS04790.1;UNL41394.1;UIT55136.1;UIN26048.1;UHC30707.1;UGQ32112.1;UFK68904.1;UFK64798.1;UCN19852.1;UCN18085.1;UPG79323.1;UAW59665.1;CUR40532.1;AEI56528.1;QIZ04707.1;KRK46776.1;EGC14149.1;EEI66207.1;EEI10215.1;EDX42648.1;CUU12237.1;QQR14398.1;CUR41951.1;QLQ625…	ABQ83560.1 hypothetical protein Lreu_1303 [Limosilactobacillus reuteri subsp. reuteri];UXE88620.1 hypothetical protein N4560_07885 [Limosilactobacillus reuteri];UAW61951.1 hypothetical protein K3F52_07465 [Limosilactobacillus reuteri];WP_229392901.1 hypoth	47	3	3	3	70.9	6.3843	1587200	485550	1036375	679380	880960	780170	1.3284	0.508343
WP_263862855.1	WP_263862855.1;WP_169473146.1;WP_124216467.1;WP_107690410.1;WP_229284986.1;WP_229271668.1;WP_229268746.1;WP_229268350.1;WP_204759119.1;WP_191338890.1;WP_169477609.1;WP_153704943.1;WP_169471323.1;PTS28829.1;WP_153703012.1;WP_152744735.1;WP_152720608.1;WP_152703997.1;WP_152701497.1;WP_152697808.1;WP_142490427.1;WP_134989296.1;UIN26047.1;WP_098046979.1;WP_086131538.1;UPG79324.1;UNL41386.1;WP_0872156…	WP_263862855.1 DUF308 domain-containing protein [Limosilactobacillus reuteri];WP_169473146.1 DUF308 domain-containing protein [Limosilactobacillus reuteri];WP_124216467.1 DUF308 domain-containing protein [Limosilactobacillus reuteri];WP_107690410.1 DUF308	185	1	1	1	7.2	12.311	612770	713010	662890	320850	322930	321890	2.05937	0.234612
ABQ83573.1	ABQ83573.1;AKP01528.1;OYS75973.1;OYS77318.1;OYS79224.1;OYS87145.1;OTA51424.1;OTA49628.1;OYS60618.1;OYS61750.1;OYS91068.1;OTA46339.1;AGN98860.1;AWD62776.1;OYS65532.1;AXX74901.1;BAG25764.1;CCC04043.1;CUR36592.1;CUR41988.1;OYS90941.1;CUU12227.1;OTA45237.1;EEI10202.1;KEK16348.1;KEQ20674.1;OYS73619.1;OYS50880.1;KRK46062.1;WLR79315.1;WP_035157640.1;WP_079376121.1;WP_094502753.1;WP_094511859.1;WP_109975…	ABQ83573.1 ribonucleoside-triphosphate reductase class III activase subunit [Limosilactobacillus reuteri subsp. reuteri];AKP01528.1 ribonucleoside-triphosphate reductase class III activase subunit [Limosilactobacillus reuteri];OYS75973.1 anaerobic ribonucl	190	5	5	5	36.5	22.234	901180	567460	734320	226420	408170	317295	2.31431	0.160717
WP_267866819.1	WP_267866819.1;WP_003664336.1;UAW59683.1;TSB18720.1;TGY57965.1;UYQ74497.1;VTZ93976.1;OYT00472.1;WJK31717.1;WP_168240565.1;UCN19836.1;WP_113897423.1;WP_094504726.1;WP_085650055.1;WP_065533174.1;WP_035155297.1;WP_003668573.1;WLR79288.1;UCN18069.1;UFK64876.1;OCW68585.1;OYT00085.1;OYS70389.1;WLC95227.1;TGY45685.1;UPG79340.1;KGE73115.1;OYS95259.1;PTM30001.1;UZM90853.1;UFK67623.1;UXE88643.1;UUW67924.1;…	WP_267866819.1 YkuJ family protein [Limosilactobacillus reuteri];WP_003664336.1 MULTISPECIES: YkuJ family protein [Lactobacillaceae];UAW59683.1 YkuJ family protein [Limosilactobacillus reuteri];TSB18720.1 DUF1797 family protein [Limosilactobacillus reuteri	163	2	2	2	21.9	11.582	75211	57110	66160.5	84918	60442	72680	0.910299	0.744665
ABQ83582.1	ABQ83582.1;WLR79284.1;TGY57961.1;UIT55159.1;OYS95254.1;UNL36382.1;WP_094504479.1;WP_003664342.1;QPB66659.1;WJK31720.1;KEK15494.1;VTZ92460.1;UYQ74501.1;UXE88647.1;UUW67928.1;UPG79344.1;UNL41365.1;QQR14368.1;QWS03594.1;RMX26592.1;RMX26628.1;RNF36940.1;OYS50144.1;WLC95232.1;UIN26025.1;UGQ32133.1;UFK67627.1;UFK64881.1;UCN19832.1;UCN18065.1;UAW61977.1;UAW59687.1;UHC30728.1;QLQ61296.1;TGY45681.1;TGB094…	ABQ83582.1 Phosphotransferase system, phosphocarrier protein HPr [Limosilactobacillus reuteri subsp. reuteri];WLR79284.1 phosphocarrier protein HPr [Limosilactobacillus reuteri];TGY57961.1 phosphocarrier protein HPr [Limosilactobacillus reuteri];UIT55159.1	159	10	10	10	85.2	9.4076	54297000	71871000	63084000	40662000	44032000	42347000	1.48969	0.295174
QKT14912.1	QKT14912.1;OTA55338.1;QDR72131.1;OYT02716.1;QLQ61292.1;VTZ92472.1;CCC03254.1;ABQ83586.1;WP_003668586.1;WP_003672171.1;WP_016496665.1;WP_035168789.1;WP_086120639.1;WP_094504476.1;WP_153706473.1;WP_123072487.1;WP_143958710.1;OTA53360.1;OTA57572.1;WP_162216554.1;OTA61384.1;OTA77317.1;OYS54144.1;OYS50148.1;OYS48986.1;OYS47729.1;OXE60594.1;OUL52965.1;OTA93359.1;OTA81620.1;OTA49472.1;OTA76867.1;OTA4392…	QKT14912.1 MucBP domain-containing protein [Limosilactobacillus reuteri];OTA55338.1 hypothetical protein BHL92_08000 [Limosilactobacillus reuteri];QDR72131.1 hypothetical protein FOD75_02945 [Limosilactobacillus reuteri];OYT02716.1 hypothetical protein CBG	196	8	8	8	46.1	28.052	2689300	2880800	2785050	2284300	1870700	2077500	1.34058	0.493545
WP_225434957.1	WP_225434957.1;QLL76440.1;WP_229304398.1;WP_283578255.1;WP_261296103.1;WP_260234860.1;WP_252413695.1;WP_242079289.1;WP_229410406.1;WP_229408393.1;WP_229407272.1;WP_229398552.1;WP_229308002.1;WP_229307067.1;WP_229304173.1;WP_218046844.1;WP_229285792.1;WP_229283537.1;WP_229280318.1;WP_229279372.1;WP_229277492.1;WP_229274146.1;WP_229273617.1;WP_229271918.1;WP_229270917.1;WP_229268730.1;WP_228341656.…	WP_225434957.1 hypothetical protein [Limosilactobacillus reuteri];QLL76440.1 hypothetical protein GTO86_07790 [Limosilactobacillus reuteri];WP_229304398.1 hypothetical protein [Limosilactobacillus reuteri];WP_283578255.1 hypothetical protein [Limosilactoba	229	1	1	1	5.6	18.122	324450	321060	322755	464820	401910	433365	0.744765	0.475419
UPG79364.1	UPG79364.1;OTA75451.1;OYS48981.1;OXE60587.1;OTA84814.1;OTA84449.1;OTA81791.1;OTA81576.1;OTA72380.1;OTA44468.1;OTA67606.1;OTA66190.1;OTA60491.1;OTA55554.1;OTA54248.1;OTA48508.1;OYS50153.1;OYS54900.1;OYS55740.1;OYS65595.1;OYS70403.1;OYS71066.1;OYS80802.1;OTA44026.1;OYS81291.1;OFB60091.1;AEI56571.1;AGN98840.1;AGR64542.1;AKP01563.1;AMY14681.1;ANU51682.1;AWD62814.1;OTA45178.1;OYS86040.1;CCC03260.1;WP_…	UPG79364.1 peptide chain release factor 3 [Limosilactobacillus reuteri];OTA75451.1 peptide chain release factor 3 [Limosilactobacillus reuteri];OYS48981.1 peptide chain release factor 3 [Limosilactobacillus reuteri];OXE60587.1 peptide chain release factor	215	19	19	19	40.8	59.477	4799500	5447400	5123450	5551600	6138600	5845100	0.876538	0.67851
WP_225414944.1	WP_225414944.1;OYT08399.1;OYT04205.1;OYS88442.1;OYS77974.1;OYS76572.1;OYS75262.1;OYS71182.1;OYT04609.1;OYS63710.1;OYS58918.1;WP_019252741.1;WP_094504560.1;WP_094566337.1;OYS60009.1;UHC30751.1;WP_223660115.1;UYQ74524.1;WP_003668632.1;UGQ32156.1;ABQ83605.1;OAV48031.1;KRK45578.1;EGC14201.1;EEI09586.1;BAG25792.1;AKP01567.1;WP_225355115.1;WP_225418383.1;UPG79368.1;OYT02606.1	WP_225414944.1 hypothetical protein [Limosilactobacillus reuteri];OYT08399.1 hypothetical protein CBG26_08210 [Limosilactobacillus reuteri];OYT04205.1 hypothetical protein CBG23_08970 [Limosilactobacillus reuteri];OYS88442.1 hypothetical protein CBG06_0824	31	1	1	1	2.5	59.577	501170	241100	371135	173970	69136	121553	3.05328	0.0560056
ABQ83616.1	ABQ83616.1;QPB66693.1;PTS28128.1;PWT36003.1;WP_152701481.1;WP_003668652.1;UYQ74531.1;UPG79377.1;UHC30760.1;UGQ32165.1;PWT70133.1;OYS77652.1;KRK49608.1;PWT67410.1;PWT65454.1;PWT61031.1;PWT56950.1;PWT55659.1;PWT45250.1;PWT43599.1;PWT33758.1;WP_229394407.1;PTS15164.1;BAG25802.1;AKP01577.1;OYS77058.1;OYS71035.1;OYT10023.1;OYT09575.1;OYT04700.1;OYT03172.1;OYS87628.1;OYS76577.1;QBE46007.1;OYS65682.1;WP…	ABQ83616.1 Mannosyl-glycoprotein endo-beta-N-acetylglucosamidase [Limosilactobacillus reuteri subsp. reuteri];QPB66693.1 mannosyl-glycoprotein endo-beta-N-acetylglucosamidase [Limosilactobacillus reuteri];PTS28128.1 mannosyl-glycoprotein endo-beta-N-acetyl	42	2	1	1	5.3	53.625	3637400	2025900	2831650	2803200	1996900	2400050	1.17983	0.719454
OYT09198.1	OYT09198.1;OTA85276.1;ROV63229.1;WP_228341642.1;WP_229407529.1;AXX74864.1;CCC03280.1;WP_229392660.1;CUU12182.1;WP_229306899.1;WP_229279350.1;WP_094538461.1;PWT55655.1;OTA42678.1;OTA76347.1;OTA51706.1;OTA66366.1;WP_019253018.1;WP_229397512.1;WP_094503923.1;UGQ32169.1;WP_285143564.1;UHC30764.1;WP_123835396.1;UXE88686.1;QKT14886.1;UUW67956.1;QLQ60886.1;UFK64910.1;UFK67657.1;WP_085650435.1;WP_0658670…	OYT09198.1 hypothetical protein CBG23_00840, partial [Limosilactobacillus reuteri];OTA85276.1 hypothetical protein BHL82_05750 [Limosilactobacillus reuteri];ROV63229.1 flippase [Limosilactobacillus reuteri];WP_228341642.1 flippase [Limosilactobacillus reut	92	1	1	1	4.9	41.102	28835	55431	42133	23758	35911	29834.5	1.41222	0.619505
ABQ83632.1	ABQ83632.1;WP_229269036.1;WP_229287974.1;WP_229285986.1;WP_229284219.1;WP_229282026.1;WP_229279779.1;WP_229277716.1;WP_229274947.1;WP_229274505.1;WP_229271827.1;WP_218046859.1;WP_079376141.1;UIN25980.1;WP_263862986.1;WP_229267701.1;WP_216578324.1;UNL36412.1;WP_086132352.1;UIT55204.1;WP_168240586.1;WP_085719386.1;WP_229288865.1;WP_229306907.1;WP_229408486.1;WP_229411838.1;OTA88289.1;OTA85266.1;OTA…	ABQ83632.1 arginine:ornithine antiporter, APA family [Limosilactobacillus reuteri subsp. reuteri];WP_229269036.1 basic amino acid/polyamine antiporter [Limosilactobacillus reuteri];WP_229287974.1 basic amino acid/polyamine antiporter [Limosilactobacillus r	216	2	2	2	7	51.207	409950	471430	440690	332720	333090	332905	1.32377	0.705506
WP_218046865.1	WP_218046865.1;WP_229281029.1;WP_273780071.1;WP_262865890.1;WP_229411832.1;WP_229303693.1;WP_229284682.1;WP_228341628.1;WP_229273198.1;WP_229281222.1;ABQ83643.1;UFK64934.1;VTZ93546.1;UYQ74558.1;WP_035154034.1;WP_020843255.1;WP_019253043.1;WP_003674789.1;WP_003670663.1;WP_273781042.1;UAW59747.1;WP_003664430.1;OCW69232.1;OTA76327.1;OTA73913.1;OTA73094.1;OTA66386.1;OTA66345.1;OTA60148.1;OCW64114.1;O…	WP_218046865.1 NAD(P)-binding domain-containing protein [Limosilactobacillus reuteri];WP_229281029.1 NAD(P)-binding domain-containing protein [Limosilactobacillus reuteri];WP_273780071.1 NAD(P)-binding domain-containing protein [Limosilactobacillus reuteri	208	3	3	3	9.7	33.546	579840	590690	585265	266030	203130	234580	2.49495	0.123431
AKP01605.1	AKP01605.1;OTA66387.1;OTA76326.1;QLL76487.1;OTA73093.1;AGN98793.1;AMY14634.1;AXX74837.1;BAG25830.1;CCC03302.1;CUR37827.1;CUR39003.1;CUR40820.1;CUR42758.1;OTA73914.1;KEK15544.1;KEK16831.2;OAV48064.1;OFB57340.1;OJI11026.1;OON65571.1;OPG88130.1;OTA42657.1;OTA49276.1;OTA51727.1;OTA52397.1;OTA60147.1;OTA66346.1;PWT30958.1;PTV04148.1;QBE46033.1;PWT70106.1;EEI09538.1;EGC14241.1;QWS05218.1;OTA79721.1;OTA…	AKP01605.1 glutamate--cysteine ligase [Limosilactobacillus reuteri];OTA66387.1 glutamate--cysteine ligase [Limosilactobacillus reuteri];OTA76326.1 glutamate--cysteine ligase [Limosilactobacillus reuteri];QLL76487.1 glutamate--cysteine ligase [Limosilactoba	239	15	15	1	37.9	59.244	3360200	3686600	3523400	1955200	1624000	1789600	1.96882	0.0960987
ABQ83685.1	ABQ83685.1;OPG88090.1;EGC14287.1;KRK50634.1;OCW61331.1;OCW61438.1;OCW63782.1;OCW68296.1;OCW69978.1;OFB59225.1;OJI11122.1;OTA42557.1;UGQ32232.1;OAV47955.1;OTA42990.1;OTA49868.1;OTA50636.1;OTA61824.1;WJK31819.1;UPG79444.1;WP_229279146.1;WP_003668753.1;EEI09448.1;AMY15047.1;OTA81089.1;QPB66758.1;CUR44130.1;OTA72900.1;OTA78283.1;OTA88964.1;PTS15762.1;PTS29461.1;QBE46071.1;QDK49452.1;QKT14832.1;RNF380…	ABQ83685.1 diacylglycerol kinase [Limosilactobacillus reuteri subsp. reuteri];OPG88090.1 diacylglycerol kinase [Limosilactobacillus reuteri];EGC14287.1 putative lipid kinase [Limosilactobacillus reuteri MM4-1A];KRK50634.1 lipid kinase [Limosilactobacillus	196	12	12	10	48.4	37.17	2096000	2326000	2211000	1569800	1747700	1658750	1.33293	0.502791
ABQ83687.1	ABQ83687.1;PWT43538.1;AGN98742.1;AKP01653.1;BAG25868.1;CCC03338.1;CUU12118.1;EEI09450.1;EEI66492.1;EGC14289.1;KRK50632.1;OFB59227.1;OON66118.1;OAV47953.1;OTA76031.1;PTM28213.1;PTM30142.1;PTS15764.1;PTS29463.1;PWT33696.1;PWT35941.1;PWT36630.1;PWT42322.1;PWT45188.1;AEI56760.1;PWT55597.1;WP_229279145.1;UFK64977.1;PWT60969.1;PWT65392.1;PWT67348.1;PWT70071.1;QBE46073.1;QLL76566.1;QPB66760.1;QWS03727.1…	ABQ83687.1 aspartyl/glutamyl-tRNA(Asn/Gln) amidotransferase subunit A [Limosilactobacillus reuteri subsp. reuteri];PWT43538.1 Asp-tRNA(Asn)/Glu-tRNA(Gln) amidotransferase GatCAB subunit A [Limosilactobacillus reuteri];AGN98742.1 aspartyl/glutamyl-tRNA amid	209	35	35	0	74.7	53.009	23819000	26861000	25340000	24937000	24938000	24937500	1.01614	0.959706
ABQ83689.1	ABQ83689.1;KEQ19903.1;CCC03340.1;CUR37371.1;CUR44126.1;CUU12116.1;QKT14828.1;OXE60518.1;EDX42844.1;EGC14291.1;KEK15349.1;KRK50630.1;OTA88929.1;OAV47951.1;OFB59229.1;OJI10978.1;OPG88069.1;EEI09452.1;QLQ62652.1;QQR14289.1;OTA42514.1;QPB66762.1;BAG25870.1;ANU51749.1;AMY14598.1;AKP01655.1;OTA57352.1;OTA61817.1;OTA65610.1;OTA71955.1;OTA72893.1;OTA74741.1;OTA76033.1;OTA78276.1;OTA86749.1;PTS15766.1;PTS…	ABQ83689.1 CamS sex pheromone cAM373 family protein [Limosilactobacillus reuteri subsp. reuteri];KEQ19903.1 calcium ABC transporter ATPase [Limosilactobacillus reuteri];CCC03340.1 conserved hypothetical protein [Limosilactobacillus reuteri subsp. suis];CUR	204	16	16	2	59.3	40.775	6666100	6027500	6346800	3847900	3494400	3671150	1.72883	0.151411
ABQ83691.1	ABQ83691.1;UCN19730.1;EEI09454.1;EGC14293.1;KRK50628.1;OAV47949.1;OFB59231.1;OJI10976.1;OPG88071.1;OTA42516.1;PWT35937.1;PWT36626.1;OTA65612.1;PWT43534.1;UCN17964.1;UGQ32238.1;WP_168240616.1;UHC30833.1;UNL41277.1;UPG79450.1;UXE88784.1;UYQ74609.1;UAW62072.1;UZM90703.1;WLR79172.1;WP_003664509.1;WP_003668763.1;WP_065533227.1;PWT42326.1;WP_109883485.1;EDX42846.1;CUU12114.1;CUR44124.1;CUR37373.1;WP_21…	ABQ83691.1 ATP-dependent DNA helicase PcrA [Limosilactobacillus reuteri subsp. reuteri];UCN19730.1 DNA helicase PcrA [Limosilactobacillus reuteri];EEI09454.1 ATP-dependent DNA helicase PcrA [Limosilactobacillus reuteri MM2-3];EGC14293.1 ATP-dependent DNA h	216	30	30	30	55.1	86.29	6036300	5603200	5819750	3557600	3512800	3535200	1.64623	0.191193
AEI56768.1	AEI56768.1;WP_134906611.1;WP_102815812.1;WP_094560837.1;QBE46081.1;WP_229304055.1;WP_271901006.1;WP_094501182.1;UAW62076.1;WP_272648915.1;WP_285227557.1;WP_285142782.1;WP_283581106.1;WP_094508380.1;WP_094529197.1;WP_086135791.1;RMX26811.1;WP_169471758.1;WP_229288325.1;UAW59798.1;TSB20155.1;WP_109897148.1;WP_136001449.1;OTA61823.1;WP_139561399.1;OTA50635.1;OTA49866.1;OTA44528.1;OTA42987.1;OYT03032…	AEI56768.1 diacetyl reductase ((R)-acetoin forming) [Limosilactobacillus reuteri SD2112];WP_134906611.1 (S)-acetoin forming diacetyl reductase [Limosilactobacillus reuteri];WP_102815812.1 (S)-acetoin forming diacetyl reductase [Limosilactobacillus reuteri]	199	2	2	2	13.9	28.27	21731	61167	41449	13991	17895	15943	2.59982	0.10608
ABQ83696.1	ABQ83696.1;EDX42853.1;QLQ62659.1;BAG25877.1;CUU12106.1;AGN98733.1;AKP01662.1;AWD62955.1;WP_003664516.1;UFK64986.1;VTZ91866.1;UFK67733.1;QPB66769.1;QWS03736.1;UXE88789.1;UYQ74614.1;UZM90698.1;WJK31831.1;UAW62077.1;WLR79167.1;OYT09345.1;WP_003668771.1;WP_229394296.1;UPG79455.1;UNL41272.1;UUW68030.1;OYS87917.1;UNL36464.1;RNF36856.1;RMX26812.1;PWT31654.1;ROV64112.1;TGB09936.1;TGY45345.1;TGY59061.1;QQ…	ABQ83696.1 SSU ribosomal protein S9P [Limosilactobacillus reuteri subsp. reuteri];EDX42853.1 ribosomal protein S9 [Limosilactobacillus reuteri subsp. rodentium];QLQ62659.1 30S ribosomal protein S9 [Limosilactobacillus reuteri];BAG25877.1 30S ribosomal prot	157	8	8	8	55.7	14.251	36009000	38868000	37438500	44252000	41524000	42888000	0.872936	0.668805
ABQ83697.1	ABQ83697.1;WJK31832.1;UHC30839.1;UZM90697.1;QPB66770.1;WP_003672672.1;WP_003664517.1;WLR79166.1;WLC95371.1;VTZ91867.1;OYS81156.1;UYQ74615.1;UXE88790.1;QLQ62660.1;UUW68031.1;UPG79456.1;UNL41271.1;UNL36465.1;UGQ32244.1;RMX24899.1;RMX26813.1;RNF36855.1;UIN25833.1;TGY59062.1;UFK67734.1;UFK64987.1;UCN19724.1;UCN17958.1;UAW62078.1;UAW59800.1;TSB20157.1;TGY42217.1;PWT36220.1;TGB09937.1;sp|B2G8U6.1|RL13_…	ABQ83697.1 LSU ribosomal protein L13P [Limosilactobacillus reuteri subsp. reuteri];WJK31832.1 50S ribosomal protein L13 [Limosilactobacillus reuteri];UHC30839.1 50S ribosomal protein L13 [Limosilactobacillus reuteri];UZM90697.1 50S ribosomal protein L13 [L	155	15	15	1	80.3	16.304	78077000	70909000	74493000	84268000	71125000	77696500	0.958769	0.900525
ABQ83702.1	ABQ83702.1;UIN25828.1;UGQ32249.1;UFK67739.1;UFK64992.1;UCN19719.1;UCN17953.1;WLR79161.1;WP_134906606.1;WP_003664528.1;WP_153704910.1;WP_229281097.1;WP_229273932.1;WP_229271870.1;UAW62083.1;UAW59805.1;TSB20162.1;UHC30844.1;UIT55355.1;PWT45174.1;UNL36470.1;OCW71580.1;OCW68313.1;OCW66500.1;OCW66414.1;OYT05893.1;OYT05631.1;PTM28198.1;WJK31837.1;VTZ91872.1;UZM90692.1;UYQ74620.1;UXE88795.1;UUW68036.1;U…	ABQ83702.1 LSU ribosomal protein L17P [Limosilactobacillus reuteri subsp. reuteri];UIN25828.1 50S ribosomal protein L17 [Limosilactobacillus reuteri];UGQ32249.1 50S ribosomal protein L17 [Limosilactobacillus reuteri];UFK67739.1 50S ribosomal protein L17 [L	165	7	7	7	48	14.201	27109000	29513000	28311000	30206000	33815000	32010500	0.884429	0.69982
ABQ83704.1	ABQ83704.1;WLC95378.1;UZM90690.1;VTZ91874.1;WP_229270677.1;WP_169478290.1;WP_134906605.1;WP_003664532.1;WLR79159.1;UFK67741.1;UCN19717.1;OYS93358.1;UGQ32251.1;UXE88797.1;UUW68038.1;UPG79463.1;UNL41264.1;UIT55357.1;QLL76583.1;TGB09944.1;UHC30846.1;TGY45492.1;sp|A5VLI0.1|RS11_LIMRD;sp|B2G8V3.1|RS11_LIMRJ;UCN17951.1;UAW62085.1;UAW59807.1;TSB20164.1;TGY57590.1;QPB66777.1;QQR14274.1;QLQ62667.1;UFK6499…	ABQ83704.1 SSU ribosomal protein S11P [Limosilactobacillus reuteri subsp. reuteri];WLC95378.1 30S ribosomal protein S11 [Limosilactobacillus reuteri];UZM90690.1 30S ribosomal protein S11 [Limosilactobacillus reuteri];VTZ91874.1 30S ribosomal protein S11 [L	159	5	5	5	34.1	13.759	35717000	37375000	36546000	39362000	31826000	35594000	1.02675	0.938175
ABQ83705.1	ABQ83705.1;VTZ91875.1;UXE88798.1;UYQ74623.1;WP_003668778.1;WP_003664533.1;WLR79158.1;WLC95379.1;WJK31840.1;UFK67742.1;UCN19716.1;OYS93359.1;UGQ32252.1;UUW68039.1;UPG79464.1;UNL41263.1;UNL36472.1;UIT55358.1;OYS95725.1;TGB09945.1;UHC30847.1;TGY45493.1;sp|A5VLI1.1|RS13_LIMRD;sp|B2G8V4.1|RS13_LIMRJ;UCN17950.1;UAW62086.1;UAW59808.1;TSB20165.1;TGY57591.1;QPB66778.1;QQR14273.1;QLQ62668.1;UFK64995.1;ROV6…	ABQ83705.1 SSU ribosomal protein S13P [Limosilactobacillus reuteri subsp. reuteri];VTZ91875.1 30S ribosomal protein S13 [Limosilactobacillus reuteri];UXE88798.1 30S ribosomal protein S13 [Limosilactobacillus reuteri];UYQ74623.1 30S ribosomal protein S13 [L	158	11	11	11	52.9	13.687	39237000	38265000	38751000	39813000	37952000	38882500	0.996618	1
WP_169478291.1	WP_169478291.1;VTZ91876.1;UCN19715.1;UHC30848.1;UFK64996.1;UFK67743.1;WLR79157.1;WLC95380.1;WJK31841.1;UZM90688.1;UGQ32253.1;UXE88799.1;QLL76585.1;UUW68040.1;UPG79465.1;UNL41262.1;UNL36473.1;UIT55359.1;UCN17949.1;QLQ62669.1;QQR14272.1;QWS03746.1;TGB09946.1;QPB66779.1;sp|A5VLI2.1|RL36_LIMRD;UAW62087.1;UAW59809.1;TSB20166.1;TGY57592.1;TGY45494.1;sp|B2G8V5.1|RL36_LIMRJ;OYS95726.1;ROV64122.1;OYS93360…	WP_169478291.1 50S ribosomal protein L36 [Limosilactobacillus reuteri];VTZ91876.1 50S ribosomal protein L36 [Limosilactobacillus reuteri];UCN19715.1 50S ribosomal protein L36 [Limosilactobacillus reuteri];UHC30848.1 50S ribosomal protein L36 [Limosilactoba	154	1	1	1	25.6	4.5486	4122300	3961000	4041650	5185500	3418500	4302000	0.939482	0.848834
ABQ83707.1	ABQ83707.1;WP_003674876.1;sp|A5VLI3.1|IF1_LIMRD;RNF36845.1;UIT55360.1;UNL41261.1;WP_134989418.1;RMX24889.1;WP_003664537.1;UXE88800.1;TGY45495.1;WLR79156.1;UPG79466.1;WLC95381.1;WJK31842.1;VTZ91877.1;UZM90687.1;UYQ74625.1;TGB09947.1;TGY57593.1;OCW62103.1;UIN25823.1;KEQ20218.1;OYS63432.1;OYS98920.1;OYT05636.1;UCN19714.1;OYS95727.1;UAW62088.1;UHC30849.1;TSB20167.1;UGQ32254.1;UFK67744.1;UFK64997.1;UC…	ABQ83707.1 bacterial translation initiation factor 1 (bIF-1) [Limosilactobacillus reuteri subsp. reuteri];WP_003674876.1 translation initiation factor IF-1 [Limosilactobacillus reuteri];sp|A5VLI3.1|IF1_LIMRD RecName: Full=Translation initiation factor IF-1	162	6	6	6	69.4	8.1615	13899000	15116000	14507500	15855000	13580000	14717500	0.985731	0.971712
ABQ83711.1	ABQ83711.1;UYQ74629.1;UGQ32258.1;UFK67748.1;WLR79153.1;WLC95385.1;WJK31845.1;VTZ91881.1;UZM90683.1;UUW68045.1;UCN17944.1;UCN19710.1;UPG79470.1;UNL41257.1;UNL36478.1;UIT55364.1;UIN25819.1;UHC30853.1;UFK65001.1;OTA77375.1;OTA77756.1;TGY45499.1;TGB09951.1;sp|B2G8W0.1|RL30_LIMRJ;sp|A5VLI7.1|RL30_LIMRD;UAW62092.1;UAW59814.1;TSB20171.1;TGY57597.1;ROV64127.1;QQR14267.1;QLL76590.1;QLQ62674.1;QKT14805.1;R…	ABQ83711.1 LSU ribosomal protein L30P [Limosilactobacillus reuteri subsp. reuteri];UYQ74629.1 50S ribosomal protein L30 [Limosilactobacillus reuteri];UGQ32258.1 50S ribosomal protein L30 [Limosilactobacillus reuteri];UFK67748.1 50S ribosomal protein L30 [L	156	3	3	3	58.3	6.5566	26214000	22469000	24341500	31502000	26494000	28998000	0.83942	0.57945
ABQ83712.1	ABQ83712.1;PTS29488.1;PWT54179.1;PWT55572.1;QBE46098.1;UNL36479.1;PWT33671.1;UNL41256.1;UYQ74630.1;UPG79471.1;UZM90682.1;VTZ91882.1;WJK31846.1;WLR79152.1;WP_003664542.1;PTV02874.1;UUW68046.1;PWT67323.1;PTS15789.1;OYS70223.1;KRK50607.1;OCW66404.1;OCW66510.1;OCW68323.1;OCW71590.1;KGE70369.1;OCX47195.1;OJI10953.1;OCW62098.1;OON66142.1;OTA45209.1;OTA49653.1;PWT70046.1;PWT65367.1;OTA63474.1;TGB09952.1…	ABQ83712.1 SSU ribosomal protein S5P [Limosilactobacillus reuteri subsp. reuteri];PTS29488.1 30S ribosomal protein S5 [Limosilactobacillus reuteri];PWT54179.1 30S ribosomal protein S5 [Limosilactobacillus reuteri];PWT55572.1 30S ribosomal protein S5 [Limos	164	16	16	1	82.2	17.646	79860000	87332000	83596000	94281000	82368000	88324500	0.946464	0.867606
UZM90681.1	UZM90681.1;AXX74772.1;PTM30168.1;PTM28187.1;PTS29489.1;PIN31250.1;AEI56786.1;AGR64613.1;AKP01678.1;AWD62976.1;CUR36424.1;PWT54178.1;PWT60223.1;CUR38817.1;PWT42348.1;CUR42302.1;EDX42870.1;EGC14315.1;KEK15328.1;KEK15619.1;PWT55571.1;PWT49310.1;CUR40039.1;UYQ74631.1;QLQ62676.1;WLC95387.1;WLR79151.1;ABQ83713.1;WJK31847.1;WP_003664543.1;VTZ91883.1;QPB66786.1;PTV02873.1;PWT45163.1;PUH36275.1;PUH36558.1…	UZM90681.1 50S ribosomal protein L18 [Limosilactobacillus reuteri];AXX74772.1 50S ribosomal protein L18 [Limosilactobacillus reuteri];PTM30168.1 50S ribosomal protein L18 [Limosilactobacillus reuteri];PTM28187.1 50S ribosomal protein L18 [Limosilactobacill	156	13	13	13	74.6	13.043	67888000	67138000	67513000	70244000	61486000	65865000	1.02502	0.94166
ABQ83715.1	ABQ83715.1;OYS95620.1;WP_229267511.1;WP_063164401.1;WP_003664546.1;WLR79149.1;WLC95389.1;WJK31849.1;VTZ91885.1;UZM90679.1;TGB09955.1;UXE88808.1;UUW68049.1;UPG79474.1;UNL41253.1;UNL36482.1;UIT55368.1;UIN25815.1;UHC30857.1;UGQ32262.1;UYQ74633.1;UFK65005.1;UCN19706.1;UCN17940.1;UAW62096.1;UAW59818.1;TSB20175.1;TGY57601.1;TGY45503.1;WP_229271872.1;sp|B2G8W4.1|RS8_LIMRJ;sp|A5VLJ1.1|RS8_LIMRD;ROV64131.…	ABQ83715.1 SSU ribosomal protein S8P [Limosilactobacillus reuteri subsp. reuteri];OYS95620.1 30S ribosomal protein S8 [Limosilactobacillus reuteri];WP_229267511.1 30S ribosomal protein S8 [Limosilactobacillus reuteri];WP_063164401.1 30S ribosomal protein S	157	15	1	0	68.2	14.536	25424000	25501000	25462500	28600000	11258000	19929000	1.27766	0.517652
ABQ83717.1	ABQ83717.1;PIN31246.1;ROV64133.1;WP_229308787.1;WP_003668784.1;WLR79147.1;WLC95391.1;VTZ91888.1;UZM90677.1;UYQ74635.1;UXE88810.1;UUW68051.1;UPG79476.1;UNL41251.1;UIT55370.1;OUL52803.1;UIN25813.1;UHC30859.1;UGQ32264.1;UFK67754.1;UFK65006.1;UCN19704.1;UCN17938.1;UAW62098.1;UAW59820.1;TSB20177.1;TGY45505.1;TGB09957.1;sp|B2G8W6.1|RL5_LIMRJ;sp|A5VLJ3.1|RL5_LIMRD;PTM30172.1;RNF36835.1;PTS29493.1;PTS157…	ABQ83717.1 LSU ribosomal protein L5P [Limosilactobacillus reuteri subsp. reuteri];PIN31246.1 50S ribosomal protein L5 [Limosilactobacillus reuteri];ROV64133.1 50S ribosomal protein L5 [Limosilactobacillus reuteri];WP_229308787.1 50S ribosomal protein L5 [L	132	19	19	1	83.9	20.171	92566000	87765000	90165500	109020000	105160000	107090000	0.84196	0.586143
ABQ83718.1	ABQ83718.1;WLC95392.1;UNL36485.1;WP_152719772.1;WP_094504448.1;WP_035157156.1;WP_003664549.1;WLR79146.1;ROV64134.1;WP_152720417.1;WJK31852.1;UZM90676.1;UYQ74636.1;UXE88811.1;UUW68052.1;UPG79477.1;UIT55371.1;sp|A5VLJ4.1|RL24_LIMRD;UCN17937.1;UIN25812.1;UHC30860.1;UGQ32265.1;UFK67755.1;UFK65007.1;PWT60218.1;UCN19703.1;PTS15795.1;UAW59821.1;TSB20178.1;TGY45506.1;TGB09958.1;sp|B2G8W7.1|RL24_LIMRJ;UAW…	ABQ83718.1 LSU ribosomal protein L24P [Limosilactobacillus reuteri subsp. reuteri];WLC95392.1 50S ribosomal protein L24 [Limosilactobacillus reuteri];UNL36485.1 50S ribosomal protein L24 [Limosilactobacillus reuteri];WP_152719772.1 50S ribosomal protein L2	138	6	6	3	53.9	10.975	10731000	17378000	14054500	14480000	28339000	21409500	0.656461	0.17769
ABQ83719.1	ABQ83719.1;UYQ74637.1;UGQ32266.1;UFK67756.1;WLR79145.1;WLC95393.1;WJK31853.1;VTZ91892.1;UZM90675.1;UUW68053.1;WP_003664550.1;QIZ04854.1;UPG79478.1;UNL41249.1;UNL36486.1;UIT55372.1;UIN25811.1;UHC30861.1;UFK65008.1;UCN19702.1;UCN17936.1;QPB66792.1;QLQ62682.1;UAW62100.1;UAW59822.1;TSB20179.1;TGY57605.1;TGY45507.1;TGB09959.1;ROV64135.1;OYS90171.1;QKT14797.1;RNF36833.1;RMX26835.1;RMX24877.1;QWS03759.1…	ABQ83719.1 LSU ribosomal protein L14P [Limosilactobacillus reuteri subsp. reuteri];UYQ74637.1 50S ribosomal protein L14 [Limosilactobacillus reuteri];UGQ32266.1 50S ribosomal protein L14 [Limosilactobacillus reuteri];UFK67756.1 50S ribosomal protein L14 [L	155	12	12	12	64.8	13.144	36239000	31269000	33754000	39147000	38641000	38894000	0.867846	0.655113
ABQ83720.1	ABQ83720.1;WLC95394.1;UIT55373.1;TSB20180.1;UNL36487.1;WP_229282769.1;WP_003664551.1;WLR79144.1;OYS95740.1;VTZ91894.1;KEQ20231.1;UZM90674.1;UYQ74638.1;UXE88813.1;UUW68054.1;UPG79479.1;UNL41248.1;QQR14258.1;TGY57606.1;QWS03760.1;RMX24876.1;RMX26836.1;OYS48732.1;WJK31854.1;UIN25810.1;UGQ32267.1;UFK67757.1;UFK65009.1;UCN19701.1;UCN17935.1;UAW62101.1;UAW59823.1;UHC30862.1;TGY45508.1;TGB09960.1;ROV641…	ABQ83720.1 SSU ribosomal protein S17P [Limosilactobacillus reuteri subsp. reuteri];WLC95394.1 30S ribosomal protein S17 [Limosilactobacillus reuteri];UIT55373.1 30S ribosomal protein S17 [Limosilactobacillus reuteri];TSB20180.1 30S ribosomal protein S17 [L	157	8	8	8	59.1	10.168	27219000	26669000	26944000	31782000	26215000	28998500	0.929152	0.820966
WP_003664552.1	WP_003664552.1;UZM90673.1;UCN17934.1;UGQ32268.1;UCN19700.1;UFK65010.1;WLC95395.1;WJK31855.1;VTZ91896.1;UYQ74639.1;UFK67758.1;UUW68055.1;QKT14795.1;UPG79480.1;UNL41247.1;UNL36488.1;UIT55374.1;UIN25809.1;UAW62102.1;QLL76600.1;QPB66794.1;QQR14257.1;sp|B2G8X0.1|RL29_LIMRJ;QLQ62684.1;ROV64137.1;UAW59824.1;TSB20181.1;TGY57607.1;TGY45509.1;TGB09961.1;sp|A5VLJ7.1|RL29_LIMRD;OYS95626.1;RNF36831.1;OYS90173…	WP_003664552.1 MULTISPECIES: 50S ribosomal protein L29 [Limosilactobacillus];UZM90673.1 50S ribosomal protein L29 [Limosilactobacillus reuteri];UCN17934.1 50S ribosomal protein L29 [Limosilactobacillus reuteri];UGQ32268.1 50S ribosomal protein L29 [Limosil	154	8	8	8	67.6	8.0041	46487000	44923000	45705000	50987000	45133000	48060000	0.950999	0.879763
ABQ83722.1	ABQ83722.1;VTZ91898.1;UIN25808.1;UHC30864.1;WP_063164400.1;WP_003664555.1;WLR79142.1;WLC95396.1;WJK31856.1;UYQ74640.1;WP_134989425.1;QLL76601.1;UXE88815.1;UUW68056.1;UPG79481.1;UNL41246.1;UNL36489.1;UIT55375.1;UGQ32269.1;UFK67759.1;UFK65011.1;QWS03762.1;QQR14256.1;UCN19699.1;UCN17933.1;UAW62103.1;UAW59825.1;TSB20182.1;TGY57608.1;sp|B2G8X1.1|RL16_LIMRJ;OYS95627.1;QLQ62685.1;sp|A5VLJ8.1|RL16_LIMRD;…	ABQ83722.1 LSU ribosomal protein L16P [Limosilactobacillus reuteri subsp. reuteri];VTZ91898.1 50S ribosomal protein L16 [Limosilactobacillus reuteri];UIN25808.1 50S ribosomal protein L16 [Limosilactobacillus reuteri];UHC30864.1 50S ribosomal protein L16 [L	155	9	9	9	53.5	16.006	31644000	36339000	33991500	36507000	38273000	37390000	0.909107	0.766685
ABQ83723.1	ABQ83723.1;WJK31857.1;UFK67760.1;UHC30865.1;UIT55376.1;UIN25807.1;WP_144226602.1;WP_003664556.1;WLC95397.1;UZM90671.1;QLL76602.1;UGQ32270.1;UYQ74641.1;UXE88816.1;UUW68057.1;UPG79482.1;UNL41245.1;UNL36490.1;OTA81044.1;RMX24873.1;RMX26839.1;RNF36829.1;OYS93377.1;TSB20183.1;TGY57609.1;TGY45511.1;UFK65012.1;UCN19698.1;UCN17932.1;UAW62104.1;UAW59826.1;TGB09963.1;QPB66796.1;QQR14255.1;QLQ62686.1;sp|A5V…	ABQ83723.1 SSU ribosomal protein S3P [Limosilactobacillus reuteri subsp. reuteri];WJK31857.1 30S ribosomal protein S3 [Limosilactobacillus reuteri];UFK67760.1 30S ribosomal protein S3 [Limosilactobacillus reuteri];UHC30865.1 30S ribosomal protein S3 [Limos	156	17	17	17	62.4	24.696	93740000	72820000	83280000	83113000	81048000	82080500	1.01461	0.962827
ABQ83725.1	ABQ83725.1;WJK31859.1;UYQ74643.1;UZM90669.1;WP_134989427.1;WP_094501166.1;WP_003664560.1;WLR79139.1;WLC95399.1;UGQ32272.1;UFK65014.1;OYS95630.1;UHC30867.1;UXE88818.1;UUW68059.1;UPG79484.1;UNL41243.1;UNL36492.1;OYS98938.1;TGY45513.1;UIN25805.1;TGY57611.1;sp|B2G8X4.1|RS19_LIMRJ;TGB09965.1;UCN19696.1;UCN17930.1;UAW62106.1;UAW59828.1;TSB20185.1;QQR14253.1;QWS03765.1;QPB66798.1;UFK67762.1;sp|A5VLK1.1|…	ABQ83725.1 SSU ribosomal protein S19P [Limosilactobacillus reuteri subsp. reuteri];WJK31859.1 30S ribosomal protein S19 [Limosilactobacillus reuteri];UYQ74643.1 30S ribosomal protein S19 [Limosilactobacillus reuteri];UZM90669.1 30S ribosomal protein S19 [L	158	7	7	7	56.5	10.401	25158000	30037000	27597500	32504000	28238000	30371000	0.908679	0.765527
ABQ83726.1	ABQ83726.1;VTZ91906.1;QLL76605.1;QLQ62689.1;QPB66799.1;QWS03766.1;WP_003664563.1;UNL41242.1;UNL36493.1;PWT49297.1;WLR79138.1;UPG79485.1;UUW68060.1;UXE88819.1;UYQ74644.1;UZM90668.1;WJK31860.1;OON66156.1;UIT55379.1;WP_168240622.1;OYS87947.1;OYT05917.1;KGE70383.1;KRK50594.1;OAV47914.1;OCW62084.1;OCW66390.1;OCW66524.1;OCW68337.1;OCX47209.1;OTA48945.1;OFB59265.1;QKT14790.1;QIZ04861.1;QDR72009.1;QDK480…	ABQ83726.1 LSU ribosomal protein L2P [Limosilactobacillus reuteri subsp. reuteri];VTZ91906.1 50S ribosomal protein L2 [Limosilactobacillus reuteri];QLL76605.1 50S ribosomal protein L2 [Limosilactobacillus reuteri];QLQ62689.1 50S ribosomal protein L2 [Limos	159	26	26	1	68.7	30.47	100010000	105210000	102610000	105040000	88088000	96564000	1.06261	0.867383
ABQ83727.1	ABQ83727.1;OPG88060.1;PWT60929.1;UHC30869.1;TSB20187.1;WP_003664564.1;TGY57613.1;WLR79137.1;OYT05918.1;WJK31861.1;UGQ32274.1;UAW59830.1;UAW62108.1;UCN17928.1;UCN19694.1;UFK65016.1;UFK67764.1;TGB09967.1;UZM90667.1;UNL36494.1;UNL41241.1;UPG79486.1;UUW68061.1;UXE88820.1;UYQ74645.1;VTZ91908.1;OYS66733.1;OYS85048.1;KRK50593.1;OAV47913.1;OFB59266.1;PWT55557.1;PWT54164.1;PWT49296.1;sp|A5VLK3.1|RL23_LIMR…	ABQ83727.1 LSU ribosomal protein L23P [Limosilactobacillus reuteri subsp. reuteri];OPG88060.1 50S ribosomal protein L23 [Limosilactobacillus reuteri];PWT60929.1 50S ribosomal protein L23 [Limosilactobacillus reuteri];UHC30869.1 50S ribosomal protein L23 [L	143	13	13	2	71.4	11.25	56483000	62929000	59706000	65917000	60086000	63001500	0.947692	0.8709
ABQ83728.1	ABQ83728.1;WJK31862.1;UFK67765.1;UFK65017.1;UCN19693.1;UCN17927.1;UAW62109.1;OYS59249.1;UZM90666.1;WLR79136.1;OCX47211.1;WLC95402.1;WP_229279141.1;WP_086141357.1;WP_003664566.1;UAW59831.1;TGB09968.1;PIN31235.1;UGQ32275.1;UHC30870.1;UIN25802.1;UIT55381.1;OCW68339.1;OCW66526.1;OCW66388.1;OYS99173.1;OYS60697.1;OYT05657.1;TGY57614.1;TSB20188.1;TGY45516.1;UYQ74646.1;UXE88821.1;UUW68062.1;UPG79487.1;UN…	ABQ83728.1 LSU ribosomal protein L4P [Limosilactobacillus reuteri subsp. reuteri];WJK31862.1 50S ribosomal protein L4 [Limosilactobacillus reuteri];UFK67765.1 50S ribosomal protein L4 [Limosilactobacillus reuteri];UFK65017.1 50S ribosomal protein L4 [Limos	164	12	12	2	67.6	22.29	63041000	71971000	67506000	69670000	83112000	76391000	0.88369	0.697825
ABQ83729.1	ABQ83729.1;UNL41239.1;UZM90665.1;UHC30871.1;UYQ74647.1;UXE88822.1;UUW68063.1;UPG79488.1;UIT55382.1;WLC95403.1;UIN25801.1;UGQ32276.1;UFK67766.1;UCN19692.1;PWT54162.1;PWT70029.1;WJK31863.1;WP_003664567.1;OCW71607.1;KRK50591.1;KEQ20239.1;OCW68340.1;OCW66527.1;OCW66387.1;OCW62081.1;OAV47911.1;OTA74344.1;WP_065869186.1;PTS15806.1;UFK65018.1;PTV02857.1;VTZ91912.1;WP_257497253.1;WP_085680811.1;PWT67306.…	ABQ83729.1 LSU ribosomal protein L3P [Limosilactobacillus reuteri subsp. reuteri];UNL41239.1 50S ribosomal protein L3 [Limosilactobacillus reuteri];UZM90665.1 50S ribosomal protein L3 [Limosilactobacillus reuteri];UHC30871.1 50S ribosomal protein L3 [Limos	163	16	16	16	65.8	23.757	56939000	57364000	57151500	63743000	58948000	61345500	0.931633	0.82767
ABQ83730.1	ABQ83730.1;OYS95635.1;UIT55383.1;UNL36496.1;WP_066035810.1;UNL41238.1;WP_003672692.1;WP_241545427.1;WP_229305532.1;WP_153701458.1;WP_063164399.1;UXE88823.1;WP_003664569.1;UPG79489.1;WLC95404.1;WJK31864.1;VTZ91914.1;UZM90664.1;UYQ74648.1;RNF36822.1;sp|A5VLK6.1|RS10_LIMRD;sp|B2G8X9.1|RS10_LIMRJ;UFK67767.1;OYS98943.1;OYT05659.1;UCN17925.1;OYS99175.1;UIN25800.1;UHC30872.1;UGQ32277.1;UFK65019.1;TGB099…	ABQ83730.1 SSU ribosomal protein S10P [Limosilactobacillus reuteri subsp. reuteri];OYS95635.1 30S ribosomal protein S10 [Limosilactobacillus reuteri];UIT55383.1 30S ribosomal protein S10 [Limosilactobacillus reuteri];UNL36496.1 30S ribosomal protein S10 [L	162	13	13	13	74.5	11.777	52535000	46893000	49714000	45952000	43097000	44524500	1.11655	0.767272
ABQ83733.1	ABQ83733.1;WJK31867.1;UFK67769.1;UFK65021.1;UCN19688.1;UCN17922.1;UAW62113.1;VTZ88400.1;WLC95409.1;TGY64563.1;WP_003668788.1;WLR79131.1;TGB09972.1;TSB20192.1;UIN25794.1;PWT37070.1;UGQ32279.1;PTM28167.1;OTA42487.1;UIT55389.1;OON66162.1;OJI10932.1;OFB59272.1;OAV47907.1;OYS94023.1;OYS53652.1;UAW59835.1;UHC30874.1;UZM90661.1;UYQ74651.1;UXE88826.1;UPG79491.1;UNL41236.1;UNL36499.1;PTM30188.1;PWT55552.1…	ABQ83733.1 SSU ribosomal protein S7P [Limosilactobacillus reuteri subsp. reuteri];WJK31867.1 30S ribosomal protein S7 [Limosilactobacillus reuteri];UFK67769.1 30S ribosomal protein S7 [Limosilactobacillus reuteri];UFK65021.1 30S ribosomal protein S7 [Limos	155	15	15	15	71.2	17.985	59723000	61234000	60478500	71019000	61720000	66369500	0.911239	0.772468
ABQ83734.1	ABQ83734.1;WLC95410.1;TSB20193.1;UNL36500.1;WP_107721656.1;WP_003668789.1;WP_003664576.1;WLR79130.1;OYS95503.1;VTZ88401.1;OYS68758.1;UZM90660.1;UYQ74652.1;UXE88827.1;UUW68067.1;UPG79492.1;UNL41235.1;RMX24861.1;UIT55390.1;TGY64562.1;RMX26849.1;RNF36818.1;WJK31868.1;UIN25793.1;UGQ32280.1;UFK67770.1;UFK65022.1;UCN19687.1;UCN17921.1;UAW62114.1;UAW59836.1;UHC30875.1;TGY44943.1;TGB09973.1;sp|B2G8Y2.1|R…	ABQ83734.1 SSU ribosomal protein S12P [Limosilactobacillus reuteri subsp. reuteri];WLC95410.1 30S ribosomal protein S12 [Limosilactobacillus reuteri];TSB20193.1 30S ribosomal protein S12 [Limosilactobacillus reuteri];UNL36500.1 30S ribosomal protein S12 [L	157	9	9	9	60.4	15.503	25850000	28229000	27039500	26251000	23242000	24746500	1.09266	0.810635
PTS15817.1	PTS15817.1;RNF38060.1;TGB09980.1;OCW62116.1;AMY14543.1;CCC03391.1;CUR38789.1;CUR40011.1;OCW66422.1;CUR43093.1;EDX42900.1;AXX74742.1;EGC14343.1;KEQ20083.1;KGE70397.1;KRK50579.1;OAV47899.1;CUU12061.1;PTS29516.1;OJI10924.1;OCW66538.1;AKP01706.1;OTA86172.1;EEI09504.1;PWT31610.1;OCW71621.1;OPG88026.1;OTA43670.1;OTA47052.1;OTA47893.1;OCW68351.1;OTA50690.1;OTA58196.1;OTA66169.1;OTA72101.1;OTA72928.1;OTA…	PTS15817.1 CtsR family transcriptional regulator [Limosilactobacillus reuteri];RNF38060.1 CtsR family transcriptional regulator [Limosilactobacillus reuteri];TGB09980.1 CtsR family transcriptional regulator [Limosilactobacillus reuteri];OCW62116.1 CtsR fam	166	11	11	11	63.2	17.693	1127600	914290	1020945	897640	869070	883355	1.15576	0.759101
OTA82637.1	OTA82637.1;OTA47046.1;QDK47990.1;CUR36915.1;CCC03392.1;BAG25922.1;OAV47898.1;OFB56551.1;OJI10923.1;OTA43671.1;OTA47894.1;EEI09505.1;OTA48658.1;OTA50689.1;KRK50578.1;OTA57559.1;OTA66170.1;QWS03783.1;CUU12060.1;RNF36811.1;EGC14344.1;OTA72100.1;OTA58195.1;PWT31609.1;PWT56500.1;ABQ83742.1;OTA78469.1;OTA84095.1;UNL41227.1;PTS15818.1;PTS29517.1;OTA77336.1;PWT38816.1;OTA72927.1;PWT42375.1;AMY14542.1;OTA…	OTA82637.1 alcohol dehydrogenase AdhP [Limosilactobacillus reuteri];OTA47046.1 alcohol dehydrogenase AdhP [Limosilactobacillus reuteri];QDK47990.1 alcohol dehydrogenase AdhP [Limosilactobacillus reuteri];CUR36915.1 Alcohol dehydrogenase [Limosilactobacillu	181	23	23	3	76.9	36.158	183860000	194720000	189290000	129450000	131400000	130425000	1.45133	0.327631
WP_225417111.1	WP_225417111.1;WP_229392735.1;WP_094529211.1;WP_229304464.1;WP_098035497.1;WP_229287502.1;WP_273774506.1;WP_273773798.1;WP_271901139.1;WP_240844069.1;WP_229407307.1;WP_229288460.1;WLC95423.1;WP_109913645.1;WP_229286124.1;WP_102815782.1;WP_229276791.1;WP_229272857.1;WP_181462691.1;WP_153706459.1;WP_152701033.1;WP_142499051.1;WP_094511782.1;WP_003664595.1;WP_107690497.1;WP_078010120.1;PWT42378.1;WP…	WP_225417111.1 amino acid permease, partial [Limosilactobacillus reuteri];WP_229392735.1 amino acid permease [Limosilactobacillus reuteri];WP_094529211.1 amino acid permease [Limosilactobacillus reuteri];WP_229304464.1 amino acid permease [Limosilactobacil	194	4	4	4	8.6	34.679	225570	193890	209730	162920	138940	150930	1.38958	0.640567
WP_255323975.1	WP_255323975.1;WP_228341967.1;WP_102815780.1;WP_094502648.1;WP_094504786.1;WP_229306733.1;WP_229305756.1;WP_229286120.1;WP_229279131.1;WP_229275368.1;WP_229271881.1;WP_162216360.1;PUH35450.1;UUW68082.1;WP_153706458.1;WP_153704525.1;WP_153703177.1;WP_153700619.1;WP_134989449.1;WP_134907904.1;WP_122481521.1;WP_107690498.1;WP_086132246.1;WP_086118085.1;UXE88854.1;UZM90645.1;UYQ74668.1;WP_003674916.1…	WP_255323975.1 threonine/serine exporter family protein, partial [Limosilactobacillus reuteri];WP_228341967.1 threonine/serine exporter family protein [Limosilactobacillus reuteri];WP_102815780.1 threonine/serine exporter family protein [Limosilactobacillu	187	1	1	1	9.7	14.115	203620	195630	199625	150820	111980	131400	1.51922	0.528355
ABQ83755.1	ABQ83755.1;QIZ04888.1;OYS72302.1;QDR71979.1;QKT14762.1;QDK47979.1;OYS74968.1;PWT69034.1;OTA48646.1;OTA58183.1;OTA58256.1;OTA66183.1;OTA67557.1;OTA71018.1;OTA73299.1;OTA75362.1;OTA75974.1;OTA82650.1;OTA84082.1;OTA86186.1;OUN50242.1;OUP90571.1;OYS44705.1;OTA47033.1;OPG87996.1;OTA48155.1;OTA43684.1;OON64890.1;CUU12046.1;UIN25770.1;UHC30897.1;AKP01721.1;UFK67790.1;UPG79514.1;UXE88860.1;UYQ74674.1;UZM…	ABQ83755.1 UspA domain protein [Limosilactobacillus reuteri subsp. reuteri];QIZ04888.1 universal stress protein [Limosilactobacillus reuteri];OYS72302.1 universal stress protein [Limosilactobacillus reuteri];QDR71979.1 universal stress protein [Limosilacto	170	14	14	14	78.5	17.57	14625000	14348000	14486500	11668000	13148000	12408000	1.16751	0.680212
ABQ83756.1	ABQ83756.1;PWT47512.1;OAV47244.1;OJI10909.1;OON64889.1;OPG87997.1;OTA43685.1;PIN30752.1;CUU12045.1;PTM26834.1;PTS16458.1;RMX26877.1;QPB66828.1;QLL76633.1;QIZ04889.1;QDK47978.1;PUH35514.1;RNF36798.1;QBE46142.1;AGR64653.1;PWT66349.1;PTM28969.1;PWT64120.1;PWT59526.1;PWT51812.1;PWT69035.1;PWT54380.1;PWT44086.1;UFK65044.1;PTS29830.1;KRK51994.1;KGE70413.1;EGC14359.1;PWT58238.1;WP_276613272.1;WP_2795371…	ABQ83756.1 amino acid ABC transporter ATP-binding protein, PAAT family [Limosilactobacillus reuteri subsp. reuteri];PWT47512.1 amino acid ABC transporter ATP-binding protein [Limosilactobacillus reuteri];OAV47244.1 amino acid ABC transporter ATP-binding pr	195	13	13	13	50.4	27.486	3270400	3547700	3409050	2810900	2419200	2615050	1.30363	0.539574
OTA47502.1	OTA47502.1;UPG79517.1;UNL36520.1;UIT55416.1;WP_094502645.1;UFK67794.1;UGQ32305.1;WP_229392739.1;WP_109884194.1;WP_098046626.1;WP_229276794.1;WP_229268331.1;WP_170090594.1;WP_162216359.1;WP_153706452.1;WP_152720499.1;WP_139561411.1;UIN25767.1;UFK65047.1;UNL41203.1;UUW68091.1;PWT47509.1;UXE88863.1;OCW69271.1;OCW67547.1;PTM26837.1;PTS16461.1;WJK31902.1;VTZ88427.1;UZM90636.1;WP_078009675.1;WP_0192531…	OTA47502.1 glutamine ABC transporter permease, partial [Limosilactobacillus reuteri];UPG79517.1 amino acid ABC transporter permease [Limosilactobacillus reuteri];UNL36520.1 amino acid ABC transporter permease [Limosilactobacillus reuteri];UIT55416.1 amino	176	2	2	2	17.1	19.55	773610	953160	863385	708950	769310	739130	1.16811	0.738569
WP_225357161.1	WP_225357161.1;WP_219178553.1;OPG88005.1;OON64881.1;OJI10901.1;OCW67905.1;PWT62685.1;UAW62151.1;PWT66341.1;OCX46651.1;WP_261296149.1;WP_182590132.1;OTA43693.1;WP_134989461.1;WP_134907277.1;WP_124216122.1;WP_122481527.1;WP_107721669.1;WP_102815767.1;WP_273774503.1;OTA71027.1;OTA67548.1;OTA42698.1;OTA47024.1;WP_094504782.1;OTA48637.1;KGE70421.1;AKP01730.1;AGR64661.1;AGN98664.1;AEI56845.1;ABS84214.1…	WP_225357161.1 MDR family MFS transporter [Limosilactobacillus reuteri];WP_219178553.1 MDR family MFS transporter [Limosilactobacillus reuteri];OPG88005.1 MFS transporter [Limosilactobacillus reuteri];OON64881.1 MFS transporter [Limosilactobacillus reuteri	223	4	4	4	5.5	55.642	307950	449330	378640	317710	501760	409735	0.924109	0.766794
EGC14370.1	EGC14370.1;VTZ88435.1;OYT06824.1;EEI66036.1;WP_289218660.1;WJK31910.1;WP_285143051.1;EEI09404.1;KRK51983.1;AEI56851.1;AGR64663.1;WP_086118082.1;WP_124216119.1;OTA47021.1;WP_260245595.1;WP_285227566.1;WP_230212764.1;WP_086142539.1;WP_229407305.1;WP_122481530.1;WP_117114938.1;UCN17889.1;UXE88872.1;WP_109913648.1;WP_152701027.1;OYS57407.1;OYS52387.1;OYS52032.1;OYS51589.1;OYS48779.1;OYS46911.1;OXE604…	EGC14370.1 hypothetical protein HMPREF0536_11507 [Limosilactobacillus reuteri MM4-1A];VTZ88435.1 Phosphatidylglycerol lysyltransferase [Limosilactobacillus reuteri];OYT06824.1 TIGR00374 family protein [Limosilactobacillus reuteri];EEI66036.1 hypothetical p	233	8	8	8	12.3	99.837	97603	149860	123732	50377	67191	58784	2.10485	0.219209
ABQ83770.1	ABQ83770.1;QQR15617.1;OYS48781.1;OYS88665.1;OXE60851.1;OUL52691.1;OYS63235.1;OYS52034.1;OYS91881.1;OYS57752.1;OYS70279.1;OYS46913.1;WP_229272863.1;EEI09407.1;OYS52385.1;OTA84067.1;KEK16710.1;OCW66933.1;OCW62958.1;OCW62752.1;OAV47258.1;WP_267866944.1;CUR43123.1;PUH35429.1;AGN98658.1;CUR39973.1;QKT14748.1;QDK47963.1;QBE46156.1;PTS29844.1;WP_134989468.1;WP_094512493.1;AGR64666.1;AEI56854.1;WP_153703…	ABQ83770.1 major facilitator superfamily MFS_1 [Limosilactobacillus reuteri subsp. reuteri];QQR15617.1 MFS transporter [Limosilactobacillus reuteri];OYS48781.1 MFS transporter [Limosilactobacillus reuteri];OYS88665.1 MFS transporter [Limosilactobacillus re	236	2	2	2	4.2	56.36	56471	63932	60201.5	32434	40092	36263	1.66014	0.427637
ABQ83773.1	ABQ83773.1;KRK51977.1;OXE60436.1;PTS16475.1;OTA67539.1;OTA71036.1;OTA73317.1;PTS29847.1;OCW62734.1;AKP01739.1;ANU51830.1;AWD63055.1;AXX74702.1;BAG25953.1;CCC03423.1;CUR36947.1;CUR38408.1;OCW62940.1;OCW66928.1;CUR39970.1;EDX42932.1;EEI09410.1;EGC14376.1;KEK15918.1;KEK16707.1;OUL52668.1;OTA84064.1;OTA82668.1;OJI10892.1;WP_229308638.1;WP_229392979.1;WP_229408543.1;WP_229279120.1;PWT68929.1;WP_229269…	ABQ83773.1 transcriptional regulator, LysR family [Limosilactobacillus reuteri subsp. reuteri];KRK51977.1 LysR family transcriptional regulator [Limosilactobacillus reuteri subsp. reuteri];OXE60436.1 LysR family transcriptional regulator [Limosilactobacill	190	11	11	11	49.2	33.598	820580	857290	838935	661960	750420	706190	1.18797	0.706383
OTA90269.1	OTA90269.1;KGE70211.1;EEI09411.1;EGC14377.1;AWD63056.1;ANU51831.1;QBE46160.1;AKP01740.1;KEK15919.1;KEK16706.1;OTA48174.1;OON64871.1;KRK51976.1;OAV47262.1;OCW62941.1;OCW66927.1;OCW67896.1;QPB66846.1;OCX46661.1;OFB58808.1;EDX42933.1;BAG25954.1;CCC03424.1;CUR36948.1;OYS58465.1;OYS62778.1;OYS68717.1;OYS72283.1;OTA58275.1;OYS74949.1;OYS87533.1;OYT00665.1;OYT06260.1;OYT06478.1;OYT06831.1;PTS16476.1;OTA…	OTA90269.1 anion permease, partial [Limosilactobacillus reuteri];KGE70211.1 2-oxoglutarate translocator [Limosilactobacillus reuteri];EEI09411.1 transporter, DASS family [Limosilactobacillus reuteri MM2-3];EGC14377.1 transporter, DASS family [Limosilactoba	198	3	3	3	7.5	50.714	148030	255470	201750	123230	127260	125245	1.61084	0.460546
ABQ83800.1	ABQ83800.1;OCW69771.1;UGQ32345.1;OJI10865.1;AKP01769.1;OFB59046.1;OTA58524.1;OCW69473.1;ANU51859.1;AWD63099.1;CCC03455.1;CUR37606.1;CUR44205.1;CUU11988.1;EDX42970.1;EGC14406.1;KEK16511.1;KEQ20126.1;OYS51551.1;KGE72256.1;OAV47287.1;OCW62422.1;OCW64214.1;OYS60974.1;OYS58322.1;OYS56149.1;OYS97423.1;WP_003664702.1;WP_019252430.1;WP_134989496.1;WP_252413702.1;UZM90582.1;VTZ88672.1;UUW68150.1;UHC30940.…	ABQ83800.1 TrkA-N domain protein [Limosilactobacillus reuteri subsp. reuteri];OCW69771.1 potassium transporter Trk [Limosilactobacillus reuteri];UGQ32345.1 TrkA family potassium uptake protein [Limosilactobacillus reuteri];OJI10865.1 potassium transporter	172	7	7	7	38.7	24.531	535030	583760	559395	295300	383440	339370	1.64833	0.4353
OJI10822.1	OJI10822.1;AGN98575.1;AMY14434.1;BAG26029.1;CCC03482.1;CUR36599.1;CUR44026.1;CUU11956.1;OTA64349.1;KEK13931.1;KEK14961.1;OAV47206.1;OFB59461.1;OPG87869.1;OTA46511.1;OTA46792.1;OTA48729.1;OTA52950.1;OTA58213.1;OTA54429.1;KEQ20179.1;AKP01830.1;OTA58048.1;OTA76290.1;TGY64599.1;OTA77208.1;OTA84329.1;OTA89960.1;OTA92721.1;PTS14197.1;OTA74602.1;PTS26825.1;PWT29635.1;QBE46246.1;QDK47908.1;QKT14693.1;QPB…	OJI10822.1 glycerol phosphate lipoteichoic acid synthase [Limosilactobacillus reuteri];AGN98575.1 phosphoglycerol transferase [Limosilactobacillus reuteri I5007];AMY14434.1 glycerol phosphate lipoteichoic acid synthase [Limosilactobacillus reuteri];BAG2602	195	20	20	1	39.8	80.126	2540000	2014800	2277400	1739300	1612000	1675650	1.35911	0.471724
UNL36622.1	UNL36622.1;OJI10812.1;UPG77788.1;UAW59964.1;TGY64611.1;QKT14682.1;QLQ61455.1;OYS55040.1;OYT01557.1;OCW63085.1;OCW64594.1;OCW67028.1;OCW67961.1;OCX49290.1;OFB59490.1;OAV47637.1;AGR64744.1;OTA74592.1;KRK50486.1;OTA49682.1;OTA52960.1;OTA54419.1;OTA58131.1;OTA58223.1;OTA64359.1;OTA73951.1;OTA46501.1;OPG87880.1;OTA46782.1;KEQ20191.1;UNL41073.1;UHC31008.1;UGQ32413.1;UFK67945.1;VTZ90652.1;WJK30022.1;WLR…	UNL36622.1 TetR/AcrR family transcriptional regulator, partial [Limosilactobacillus reuteri];OJI10812.1 TetR family transcriptional regulator [Limosilactobacillus reuteri];UPG77788.1 TetR/AcrR family transcriptional regulator [Limosilactobacillus reuteri];	175	5	5	2	40.4	19.287	508940	173480	341210	335640	260410	298025	1.1449	0.911136
WP_271901485.1	WP_271901485.1;WP_109884786.1;WP_094511891.1;WP_229308858.1;WP_229286701.1;WP_229271353.1;WP_153705094.1;WP_152718041.1;WP_144227594.1;WP_003669028.1;WP_003664828.1;WP_003672397.1;WP_094501331.1;WP_085719723.1;WP_085650404.1;WP_019254191.1;WP_019251543.1;WP_003675036.1;PWT57213.1;UNL36623.1;UAW62293.1;UPG77789.1;OYT01556.1;WJK30023.1;VTZ90650.1;UZM90525.1;UYQ74800.1;UXE88993.1;UUW68244.1;WLR78977…	WP_271901485.1 PspC domain-containing protein [Limosilactobacillus reuteri];WP_109884786.1 PspC domain-containing protein [Limosilactobacillus reuteri];WP_094511891.1 PspC domain-containing protein [Limosilactobacillus reuteri];WP_229308858.1 PspC domain-c	158	1	1	1	15.7	9.2887	1368700	1403500	1386100	613430	646970	630200	2.19946	0.0516114
UHC31015.1	UHC31015.1;WP_229398523.1;OYS64200.1;WP_085719719.1;AXX74583.1;WP_153701006.1;WP_113897230.1;WP_273773705.1;WP_271901476.1;WP_260235193.1;UIN25616.1;OYS55033.1;WP_229284855.1;WP_229283927.1;WP_229281195.1;WP_229279043.1;AGR64752.1;WP_229269187.1;WP_086879138.1;OUL52478.1;UGQ32420.1;WP_020843343.1;OTA52967.1;OTA54412.1;OYS50556.1;OYS49177.1;UPG77795.1;OXE60332.1;OUP88019.1;OUN46604.1;OTA92738.1;OT…	UHC31015.1 amino acid permease [Limosilactobacillus reuteri];WP_229398523.1 amino acid permease [Limosilactobacillus reuteri];OYS64200.1 amino acid permease [Limosilactobacillus reuteri];WP_085719719.1 amino acid permease [Limosilactobacillus reuteri];AXX7	215	3	3	3	6.5	50.11	742130	582170	662150	688140	611900	650020	1.01866	0.987394
UNL36631.1	UNL36631.1;AKP01853.1;OYS53138.1;OYS55030.1;OYS56372.1;OYS64203.1;OYS67020.1;OYS70008.1;OYS71218.1;OTA46772.1;OYS81884.1;OTA45907.1;OJI10801.1;AGN98554.1;AGR64754.1;AMY14414.1;OCW63075.1;AXX74581.1;BAG26050.1;CCC03503.1;CUR37908.1;CUR44004.1;CUU11934.1;EEI09234.1;EGC14495.1;KEK14942.1;KEQ20199.1;KGE71159.1;KRK50476.1;OAV46775.1;OYS50553.1;OYS49174.1;OYS47007.1;OTA92741.1;WP_109884798.1;WP_1138972…	UNL36631.1 ABC transporter substrate-binding protein, partial [Limosilactobacillus reuteri];AKP01853.1 extracellular solute-binding protein [Limosilactobacillus reuteri];OYS53138.1 spermidine/putrescine ABC transporter substrate-binding protein [Limosilact	216	10	10	10	39.5	40.768	526250	532110	529180	405120	309100	357110	1.48184	0.558667
ABQ83888.1	ABQ83888.1;KRK50471.1;QPB66960.1;OYS64208.1;OYS56377.1;OYS55025.1;OYS53133.1;OYS50548.1;OYS49169.1;OYS47002.1;OXE60324.1;OUP84705.1;OUN42499.1;OPG87893.1;OFB57564.1;OCX49305.1;OYS67015.1;OCW67947.1;OCW64579.1;OCW63070.1;OCW61825.1;QQR14094.1;WLR78964.1;QWS03916.1;WJK30036.1;WP_260241496.1;WP_229303489.1;WP_229280173.1;WP_229272924.1;WP_168240675.1;WP_153707527.1;WP_003669047.1;WLC95567.1;UUW68258…	ABQ83888.1 prolinase, Serine peptidase, MEROPS family S33 [Limosilactobacillus reuteri subsp. reuteri];KRK50471.1 proline-specific peptidase [Limosilactobacillus reuteri subsp. reuteri];QPB66960.1 proline iminopeptidase-family hydrolase [Limosilactobacillu	129	16	16	0	59.1	34.841	6646900	7961000	7303950	6857100	8321500	7589300	0.962401	0.910196
[truncated: 1,029 more rows]

## Sheet: OsmC_vs_36E
Protein	ProteinGroup	FastaHeaders	Proteins	Peptides	RazorUniquePeptides	UniquePeptides	Coverage	MolWeight	LFQ intensity OsmC-1	LFQ intensity OsmC-2	average OsmC	LFQ intensity 36E-1	LFQ intensity 36E-2	average 36E	OsmC/36E	Significance B
[truncated: 1,548 more rows]

## Sheet: Glu_vs_36E
Protein	ProteinGroup	FastaHeaders	Proteins	Peptides	RazorUniquePeptides	UniquePeptides	Coverage	MolWeight	LFQ intensity Glu-1	LFQ intensity Glu-2	average Glu	LFQ intensity 36E-1	LFQ intensity 36E-2	average 36E	Glu/36E	Significance B
[truncated: 1,582 more rows]
